# Supplementary material for: A mathematical model that predicts human biological age from physiological traits identifies environmental and genetic factors that influence aging
Source: eLife. 2025 Jun 11;13:RP92092. doi: 10.7554/eLife.92092 (PMC12158426; doi:10.7554/eLife.92092)
Supplement: Supplementary file 6. [file elife-92092-supp6.xlsx]

## Sheet: Sheet1
Row #	UKBB field_id #	Size effect	correlation to dAge p-value	Number of participants	Description of the Field
1	90112	-0.133971	1.00601e-15	47484	Fraction acceleration <= 25 milli-gravities
2	90113	-0.142237	1.57252e-17	47484	Fraction acceleration <= 30 milli-gravities
3	90114	-0.14629	1.87247e-18	47484	Fraction acceleration <= 35 milli-gravities
4	90115	-0.145537	2.79322e-18	47484	Fraction acceleration <= 40 milli-gravities
5	90116	-0.145364	3.06075e-18	47484	Fraction acceleration <= 45 milli-gravities
6	90117	-0.144129	5.86501e-18	47484	Fraction acceleration <= 50 milli-gravities
7	90118	-0.143962	6.404e-18	47484	Fraction acceleration <= 55 milli-gravities
8	90119	-0.139186	7.50621e-17	47484	Fraction acceleration <= 60 milli-gravities
9	90120	-0.13327	1.41559e-15	47484	Fraction acceleration <= 65 milli-gravities
10	90121	-0.127072	2.6879e-14	47484	Fraction acceleration <= 70 milli-gravities
11	90122	-0.12269	1.98408e-13	47484	Fraction acceleration <= 75 milli-gravities
12	90123	-0.116707	2.72367e-12	47484	Fraction acceleration <= 80 milli-gravities
13	90124	-0.116436	3.05843e-12	47484	Fraction acceleration <= 85 milli-gravities
14	90125	-0.110971	2.98081e-11	47484	Fraction acceleration <= 90 milli-gravities
15	90126	-0.105858	2.28166e-10	47484	Fraction acceleration <= 95 milli-gravities
16	90127	-0.101208	1.34104e-09	47484	Fraction acceleration <= 100 milli-gravities
17	90128	-0.0780378	2.95185e-06	47484	Fraction acceleration <= 125 milli-gravities
18	90129	-0.0609147	0.000263902	47484	Fraction acceleration <= 150 milli-gravities
19	90130	-0.0507285	0.00237974	47484	Fraction acceleration <= 175 milli-gravities
20	19	0.7043	3.71362e-09	146508	Heel ultrasound method
21	90131	-0.042276	0.011343	47484	Fraction acceleration <= 200 milli-gravities
22	21	4.18703	0.0288961	215789	Weight method
23	90132	-0.0328967	0.0488169	47484	Fraction acceleration <= 225 milli-gravities
24	23	0.933552	2.74936e-06	199714	Spirometry method
25	90133	-0.0237295	0.155272	47484	Fraction acceleration <= 250 milli-gravities
26	90134	-0.0148704	0.373155	47484	Fraction acceleration <= 275 milli-gravities
27	90135	-0.0085112	0.610242	47484	Fraction acceleration <= 300 milli-gravities
28	90136	-0.0020356	0.90297	47484	Fraction acceleration <= 325 milli-gravities
29	90137	0.00368998	0.825101	47484	Fraction acceleration <= 350 milli-gravities
30	90138	0.00532874	0.749626	47484	Fraction acceleration <= 375 milli-gravities
31	90139	0.00992377	0.552294	47484	Fraction acceleration <= 400 milli-gravities
32	31	0	1	215934	Sex
33	90140	0.0129153	0.439234	47484	Fraction acceleration <= 425 milli-gravities
34	90141	0.0143542	0.389975	47484	Fraction acceleration <= 450 milli-gravities
35	34	0.0168735	0.0397239	215934	Year of birth
36	35	0	1	545184	Was blood sampling attempted
37	90142	0.0138018	0.408477	47484	Fraction acceleration <= 475 milli-gravities
38	90143	0.0138851	0.405653	47484	Fraction acceleration <= 500 milli-gravities
39	90144	0.0147534	0.37693	47484	Fraction acceleration <= 600 milli-gravities
40	90145	0.0109568	0.511699	47484	Fraction acceleration <= 700 milli-gravities
41	90146	0.00493759	0.767454	47484	Fraction acceleration <= 800 milli-gravities
42	90147	0.00106847	0.948979	47484	Fraction acceleration <= 900 milli-gravities
43	90148	-0.00116714	0.944274	47484	Fraction acceleration <= 1000 milli-gravities
44	90149	-0.00306598	0.854313	47484	Fraction acceleration <= 1100 milli-gravities
45	90150	-0.00438865	0.79268	47484	Fraction acceleration <= 1200 milli-gravities
46	90151	-0.00493709	0.767476	47484	Fraction acceleration <= 1300 milli-gravities
47	46	-0.941127	0	215013	Hand grip strength (left)
48	47	-0.937526	0	215057	Hand grip strength (right)
49	90152	-0.00551479	0.741192	47484	Fraction acceleration <= 1400 milli-gravities
50	90153	-0.00581562	0.727621	47484	Fraction acceleration <= 1500 milli-gravities
51	90154	-0.00714981	0.668509	47484	Fraction acceleration <= 1600 milli-gravities
52	90155	-0.00814459	0.625711	47484	Fraction acceleration <= 1700 milli-gravities
53	52	0.082128	0.04567	215934	Month of birth
54	90156	-0.0096692	0.562535	47484	Fraction acceleration <= 1800 milli-gravities
55	54	0	1	546459	UK Biobank assessment centre
56	55	0.401551	6.91138e-21	215934	Month of attending assessment centre
57	90159	-0.0165566	0.32141	47484	Error tolerance before calibration
58	90160	-0.0347354	0.0374966	47484	Error tolerance after calibration
59	90161	0.00696904	0.676409	47484	Calibration coefficients - x offset
60	90171	-0.0541127	0.00119139	47484	Calibration - number of static points
61	90163	0.0125664	0.451694	47484	Calibration coefficients - z offset
62	90164	-0.0440948	0.00826891	47484	Calibration coefficients - x slope
63	62	1.4087	7.71427e-76	215933	Willing to attempt cognitive tests
64	90166	-0.0223969	0.17981	47484	Calibration coefficients - z slope
65	90167	-0.0292749	0.0795552	47484	Calibration coefficients - x temp
66	90168	-0.00128726	0.93855	47484	Calibration coefficients - y temp
67	90169	0.0332916	0.0461692	47484	Calibration coefficients - z temp
68	90179	-0.0307387	0.0656301	47484	Device ID
69	90180	-0.00432391	0.79567	47484	Interrupted recording periods
70	68	0.18625	3.23584e-114	215932	Number of blood samples taken
71	90182	-0.0048899	0.769636	47484	Data recording errors
72	90183	0.0127021	0.446825	47484	Readings exceeding +/-8 gravities before calibration
73	90184	-0.064764	0.000104905	47484	Maximum readings exceeding +/-8 gravities before calibration in a 5 second epoch
74	90185	0.00441567	0.791433	47484	Readings exceeding +/-8 gravities after calibration
75	74	0.103752	1.15119e-36	215927	Fasting time
76	90186	-0.0645994	0.000109238	47484	Maximum readings exceeding +/-8 gravities after calibration in a 5 second epoch
77	90187	-0.0191168	0.252253	47484	Total data readings
78	90181	-0.0324102	0.0522517	47484	Duration of interrupted recording periods
79	90188	-0.0175229	0.293978	47484	Sample rate average
80	77	-0.122931	1.08547e-05	19598	Heel bone ultrasound T-score, manual entry
81	78	-0.082377	1.00605e-14	125881	Heel bone mineral density (BMD) T-score, automated
82	90191	-0.015622	0.349484	47484	Sample rate maximum
83	90190	0.0178213	0.285832	47484	Sample rate minimum
84	90189	-0.0252574	0.130367	47484	Sample rate standard deviation
85	84	-0.0301649	0.264257	21412	Cancer year/age first occurred
86	90192	-0.0201623	0.227237	47484	Temperature average
87	90195	-0.0461169	0.0057447	47484	Temperature maximum
88	87	-0.173393	5.8204e-71	159444	Non-cancer illness year/age first occurred
89	90194	0.00436589	0.793731	47484	Temperature minimum
90	90193	-0.0620657	0.000201344	47484	Temperature standard deviation
91	3	0.391997	0	215929	Verbal interview duration
92	92	-0.0565474	5.52091e-10	176841	Operation year/age first occurred
93	93	0.245615	2.11153e-19	19219	Systolic blood pressure, manual reading
94	94	0.148121	5.68867e-08	19219	Diastolic blood pressure, manual reading
95	95	-0.0804494	0.00320355	19219	Pulse rate (during blood-pressure measurement)
96	96	0.287533	8.02645e-270	215929	Time since interview start at which blood pressure screen(s) shown
97	102	0.137298	3.76021e-59	203118	Pulse rate, automated reading
98	41066	0.101562	0.00153627	12195	Episodes containing "Number of weeks of gestation" data
99	41067	0.101697	0.00151414	12195	Episodes containing "Delivery place" data
100	41068	0.101562	0.00153627	12195	Episodes containing "Delivery method" data
101	41069	0.101562	0.00153627	12195	Episodes containing "Birth order" data
102	41070	0.175214	9.02173e-06	8002	Episodes containing "Date of birth of baby" data
103	111	0	1	522010	Aide-memoire completed
104	41072	0.101562	0.00153627	12195	Episodes containing "Resuscitation method" data
105	41073	0.0864446	0.00913588	11445	Episodes containing "Sex of baby" data
106	41071	0.105967	0.000949103	12195	Episodes containing "Status of baby at birth" data
107	41075	0.101562	0.00153627	12195	Episodes containing "Status of person conducting delivery" data
108	41076	0.67203	1.49048e-26	4258	Episodes containing "Diagnoses - secondary ICD9" data
109	41077	0	1	0	0
110	41078	0.355192	2.74201e-253	140524	Episodes containing "Diagnoses - secondary ICD10" data
111	41079	0.554033	4.90084e-05	1384	Episodes containing "Diagnoses - secondary ICD10 addendum" data
112	120	0.104234	1.12322e-09	215929	Birth weight known
113	41074	0.0925979	0.00389822	12181	Episodes containing "Weight of baby" data
114	41082	0.232055	3.13707e-115	145828	Episodes containing "Dates of operations" data
115	41083	0.256548	2.46998e-166	171583	Episodes containing "Episode start date" data
116	41084	0.2564	3.862e-166	171580	Episodes containing "Episode end date" data
117	41085	0.255577	2.31946e-167	173659	Episodes containing "Duration of episode" data
118	41086	0.276285	2.03751e-179	159096	Episodes containing "Episode order" data
119	41087	0.279597	5.97856e-175	151413	Episodes containing "Episode status" data
120	41088	0.279601	6.00499e-175	151409	Episodes containing "Duration of episode within HES data year" data
121	129	-0.0758324	6.45174e-20	210429	Place of birth in UK - north co-ordinate
122	130	-0.0106841	0.198052	210429	Place of birth in UK - east co-ordinate
123	41089	0.279606	5.93158e-175	151409	Episodes containing "Beginning of spell indicator" data
124	132	0	1	370345	Job code
125	41092	0.246568	1.46272e-108	123149	Episodes containing "Current PCT responsible for patient" data
126	134	0.331234	0	215929	Number of self-reported cancers
127	135	0.631079	0	215929	Number of self-reported non-cancer illnesses
128	136	0.568431	0	215929	Number of operations, self-reported
129	137	0.408602	0	215929	Number of treatments/medications taken
130	41094	0.255858	2.24962e-67	70395	Episodes containing "Administrative and legal status of patient" data
131	41096	0.276343	1.01874e-190	169586	Episodes containing "Date of admission to hospital" data
132	41095	0.213258	2.1302e-101	150672	Episodes containing "Date of decision to admit to hospital" data
133	41101	0.26061	9.13449e-170	169555	Episodes containing "Date of discharge from hospital" data
134	41100	0.190668	4.47179e-47	88618	Episodes containing "First regular day or night of admission to hosp" data
135	41103	0.292036	5.46605e-225	178722	Episodes containing "Destination on discharge from hospital" data (polymorphic)
136	41098	0.293786	2.061e-230	180638	Episodes containing "Method of admission to hospital" data (polymorphic)
137	41102	0.293823	1.7825e-230	180637	Episodes containing "Method of discharge from hospital" data (polymorphic)
138	41099	0.293785	2.06731e-230	180638	Episodes containing "Source of admission to hospital" data (polymorphic)
139	41105	-0.0326916	0.951612	56	Episodes containing "External cause - ICD10 addendum" data
140	41104	0.325075	5.89964e-37	26478	Episodes containing "External cause - ICD10" data
141	41109	0.292012	6.03472e-225	178722	Episodes containing "Patient classification on admission" data (polymorphic)
142	41110	0.290658	6.88944e-208	166014	Episodes containing "Intended management of patient" data (polymorphic)
143	41111	0.290675	6.61126e-208	166011	Episodes containing "Main speciality of consultant" data (polymorphic)
144	41112	0.29379	2.0364e-230	180637	Episodes containing "Treatment speciality of consultant" data (polymorphic)
145	41113	0.0850971	0.0380848	7327	Episodes containing "Date of first antenatal assessment" data
146	41114	0.0360771	0.43133	5912	Episodes containing "Gestation period at first antenatal assessment" data
147	41115	0.0932635	0.0184178	7977	Episodes containing "Antenatal stay" data
148	41116	0.063104	0.049071	12195	Episodes containing "Intended delivery place" data
149	41117	0.063104	0.049071	12195	Episodes containing "Reason for changing delivery place" data
150	41118	0.063104	0.049071	12195	Episodes containing "Anaesthetic administered during delivery" data
151	41119	0.063104	0.049071	12195	Episodes containing "Anaesthetic administered post delivery" data
152	41120	0.063104	0.049071	12195	Episodes containing "Delivery onset method" data
153	41121	0.063104	0.049071	12195	Episodes containing "Number of babies delivered from single pregnancy" data
154	41122	0.0864719	0.0291542	7943	Episodes containing "Postnatal stay" data
155	41123	0.283001	3.3965e-182	153552	Episodes containing "Level of neonatal care" data
156	41124	0.0926555	0.0189696	7999	Episodes containing "Mother age on date of delivery" data
157	41125	0.063257	0.0485241	12195	Episodes containing "Number of previous pregnancies" data
158	33	0	1	0	0
159	41132	0.279597	5.97856e-175	151413	Episodes containing "Episode type" data
160	41142	0.255305	6.12741e-165	171763	Episodes containing "Diagnoses - main ICD10" data
161	41143	0.322524	0.0342347	1017	Episodes containing "Diagnoses - main ICD10 - addendum" data
162	41144	0.371299	8.16253e-22	10357	Episodes containing "Diagnoses - main ICD9" data
163	41145	0	1	0	0
164	41146	0.252071	3.3578e-161	172033	Episodes containing "Operative procedure - main OPCS4" data
165	41147	0	1	0	0
166	41148	0.217006	1.10296e-116	167114	Episodes containing "Date of operation" data
167	189	0.118598	2.34894e-47	215680	Townsend deprivation index at recruitment
168	190	-2.41997	0.0297819	412	Reason lost to follow-up
169	191	0	1	1299	Date lost to follow-up
170	37	0	1	10011	Blood pressure manual sphygmomanometer device ID
171	38	0	1	552478	Hand grip dynamometer device ID
172	39	0	1	552721	Height measure device ID
173	200	0	1	502534	Date of consenting to join UK Biobank
174	40	0	1	529904	Manual scales device ID
175	41	0	1	552655	Seating box device ID
176	42	0	1	540659	Spirometer device ID
177	43	0	1	552667	Impedance device ID
178	44	0	1	552734	Tape measure device ID
179	45	0	1	551113	Heel ultrasound device id
180	41200	0	1	1655338	Operative procedures - main OPCS4
181	41201	0	1	85557	External causes
182	41202	0	1	1725736	Diagnoses - main ICD10
183	41203	0	1	42834	Diagnoses - main ICD9
184	41204	0	1	2066420	Diagnoses - secondary ICD10
185	41205	0	1	17292	Diagnoses - secondary ICD9
186	48	0.339468	0	215650	Waist circumference
187	49	0.0750373	5.88925e-20	215633	Hip circumference
188	41206	0.0707803	7.28296e-14	166014	Intended management of patient (polymorphic)
189	41207	0	1	1096286	Main speciality of consultant (polymorphic)
190	41210	0	1	1685115	Operative procedures - secondary OPCS4
191	41211	0	1	540119	Destinations on discharge from hospital (polymorphic)
192	50	-0.574129	0	215607	Standing height
193	41212	0	1	1003488	Methods of admission to hospital (polymorphic)
194	41214	0	1	99075	Carer support indicators
195	41215	0.12079	0.231093	19975	Detention categories
196	41216	0	1	42	Legal statuses
197	41217	15.5161	0.010455	18	Mental categories
198	41218	1.31986	0.00297705	151413	History of psychiatric care on admission
199	41219	0.458813	0.0714894	12195	Anaesthetics administered during delivery
200	41220	-1.59539	0.109997	12195	Anaesthetics administered post delivery
201	41221	0	1	0	0
202	41222	0.548101	2.93437e-06	12195	Delivery onset methods
203	41223	-1.08932	0.0256982	12195	Delivery places
204	41224	0.36789	0.0546216	12195	Intended delivery places
205	41225	0.835934	0.0316483	12195	Resuscitation methods
206	41226	-0.501823	0.503081	11445	Sex of baby
207	41227	1.32295	0.195971	12195	Status of baby at birth
208	41228	-0.519395	1.33759e-10	12195	Statuses of person conducting delivery
209	41229	0	1	301256	PCT responsible for patient data
210	41230	0	1	489215	PCT where patients GP was registered
211	41231	-0.448491	1.48878e-19	151413	Hospital episode type
212	41232	0	1	152083	Administrative and legal statuses
213	53	0	1	546533	Date of attending assessment centre
214	41233	0.206211	2.19561e-114	180638	Sources of admission to hospital (polymorphic)
215	41235	0.248725	1.23663e-132	145922	Spells in hospital
216	41236	0.264711	5.06306e-153	148585	Episodes containing "Method of admission to hospital" data (recoded)
217	41237	0.264699	5.19592e-153	148584	Episodes containing "Source of admission to hospital" data (recoded)
218	41238	0.264769	4.35152e-153	148585	Episodes containing "Method of discharge from hospital" data (recoded)
219	41239	0.262357	2.23106e-147	145919	Episodes containing "Destination on discharge from hospital" data (recoded)
220	41240	0.227915	2.07707e-90	120137	Episodes containing "Patient classification on admission" data (recoded)
221	41241	0.259356	2.61884e-133	134292	Episodes containing "Intended management of patient" data (recoded)
222	41242	0.259342	2.74702e-133	134288	Episodes containing "Main speciality of consultant" data (recoded)
223	41243	0.266167	7.14025e-154	147849	Episodes containing "Treatment speciality of consultant" data (recoded)
224	41244	0.293514	1.90817e-12	134292	Intended management of patient (recoded)
225	41245	0	1	661851	Main speciality of consultant (recoded)
226	41246	0	1	738111	Treatment speciality of consultant (recoded)
227	41247	0	1	390969	Patient classification on admission (recoded)
228	41248	0	1	400558	Destinations on discharge from hospital (recoded)
229	41249	0	1	682470	Methods of admission to hospital (recoded)
230	41250	0	1	403170	Methods of discharge from hospital (recoded)
231	41251	0	1	376783	Sources of admission to hospital (recoded)
232	41252	0.255725	1.45797e-167	173665	Episodes containing "Inpatient record format" data
233	41253	-0.356468	2.09352e-29	173665	Inpatient record format
234	41254	0	1	0	0
235	41255	0	1	0	0
236	41256	0	1	0	0
237	41257	0	1	0	0
238	41258	0	1	0	0
239	41260	0	1	1655318	Date of first operative procedure - main OPCS4
240	41262	0	1	1725736	Date of first in-patient diagnosis - main ICD10
241	41263	0	1	0	0
242	41270	0	1	0	Diagnoses - ICD10
243	41271	0	1	0	0
244	41272	0	1	0	Operative procedures - OPCS4
245	41273	0	1	0	0
246	41274	0	1	0	0
247	41280	0	1	4129721	Date of first in-patient diagnosis - ICD10
248	41281	0	1	0	0
249	41282	0	1	3639160	Date of first operative procedure - OPCS4
250	41283	0	1	0	0
251	393	0	1	0	0
252	42022	0	1	0	0
253	396	0	1	215934	Number of columns displayed in round
254	397	0	1	215934	Number of rows displayed in round
255	398	-0.196356	9.58895e-127	215934	Number of correct matches in round
256	399	0.261363	3.31018e-223	215934	Number of incorrect matches in round
257	400	0.483347	0	212736	Time to complete round
258	401	0	1	6596064	Index for card A in round
259	402	0	1	6596064	Index for card B in round
260	403	0.0239102	0.0035845	215414	Number of times snap-button pressed
261	404	0.881105	0	214722	Duration to first press of snap-button in each round
262	24504	0.0459935	1.63367e-07	187746	Domestic garden percentage, buffer 300m
263	25000	0.307209	4.86974e-11	6266	Volumetric scaling from T1 head image to standard space
264	25001	0.099539	0.033417	6266	Volume of peripheral cortical grey matter (normalised for head size)
265	25002	-0.17763	0.000146311	6266	Volume of peripheral cortical grey matter
266	25003	0.0473837	0.311348	6266	Volume of ventricular cerebrospinal fluid (normalised for head size)
267	25004	0.00588467	0.899949	6266	Volume of ventricular cerebrospinal fluid
268	25005	0.0874312	0.06173	6266	Volume of grey matter (normalised for head size)
269	25006	-0.206682	9.9063e-06	6266	Volume of grey matter
270	25007	0.107343	0.0217979	6266	Volume of white matter (normalised for head size)
271	25008	-0.166892	0.000360461	6266	Volume of white matter
272	25009	0.115451	0.0136168	6266	Volume of brain, grey+white matter (normalised for head size)
273	25010	-0.200021	1.89798e-05	6266	Volume of brain, grey+white matter
274	25011	-0.289059	6.3163e-10	6262	Volume of thalamus (left)
275	25012	-0.270147	7.61692e-09	6262	Volume of thalamus (right)
276	25013	-0.214031	4.77397e-06	6262	Volume of caudate (left)
277	25014	-0.219175	2.80493e-06	6262	Volume of caudate (right)
278	25015	-0.17267	0.00022478	6262	Volume of putamen (left)
279	25016	-0.130422	0.00533555	6262	Volume of putamen (right)
280	25017	-0.144051	0.00208815	6262	Volume of pallidum (left)
281	25018	-0.159399	0.000660289	6262	Volume of pallidum (right)
282	25019	-0.169429	0.000294513	6262	Volume of hippocampus (left)
283	25020	-0.180105	0.000118869	6262	Volume of hippocampus (right)
284	25021	-0.133283	0.00441073	6262	Volume of amygdala (left)
285	25022	-0.0876935	0.0610726	6262	Volume of amygdala (right)
286	25023	-0.132416	0.00467424	6262	Volume of accumbens (left)
287	25024	-0.0484778	0.300532	6262	Volume of accumbens (right)
288	25025	-0.279414	2.29462e-09	6262	Volume of brain stem + 4th ventricle
289	25026	-0.0859079	0.0293952	8632	Median T2star in thalamus (left)
290	25027	-0.0803505	0.0416294	8632	Median T2star in thalamus (right)
291	25028	-0.0626757	0.112059	8632	Median T2star in caudate (left)
292	25029	-0.0666853	0.090899	8632	Median T2star in caudate (right)
293	25030	-0.106164	0.00710438	8632	Median T2star in putamen (left)
294	25031	-0.135489	0.000590459	8632	Median T2star in putamen (right)
295	25032	-0.0593356	0.132501	8632	Median T2star in pallidum (left)
296	25033	-0.0350056	0.374839	8632	Median T2star in pallidum (right)
297	25034	-0.112749	0.00425007	8632	Median T2star in hippocampus (left)
298	25035	-0.120021	0.00233878	8632	Median T2star in hippocampus (right)
299	25036	-0.0186812	0.635793	8632	Median T2star in amygdala (left)
300	25037	-0.105422	0.00751514	8632	Median T2star in amygdala (right)
301	25038	0.057637	0.143949	8632	Median T2star in accumbens (left)
302	25039	0.0359671	0.361863	8632	Median T2star in accumbens (right)
303	25040	0.0430758	0.388033	5513	Median BOLD effect (in group-defined mask) for shapes activation
304	25042	-0.0230998	0.643449	5513	Median z-statistic (in group-defined mask) for shapes activation
305	25044	-0.00301387	0.951843	5513	Median BOLD effect (in group-defined mask) for faces activation
306	25046	-0.0696747	0.162631	5513	Median z-statistic (in group-defined mask) for faces activation
307	25048	-0.13733	0.00590882	5513	Median BOLD effect (in group-defined mask) for faces-shapes contrast
308	25050	-0.170214	0.000643476	5513	Median z-statistic (in group-defined mask) for faces-shapes contrast
309	25052	-0.13498	0.00681684	5513	Median BOLD effect (in group-defined amygdala activation mask) for faces-shapes contrast
310	25054	-0.14596	0.0034344	5513	Median z-statistic (in group-defined amygdala activation mask) for faces-shapes contrast
311	25056	-0.0697317	0.159372	5595	Mean FA in middle cerebellar peduncle on FA skeleton
312	25057	-0.0355318	0.473383	5595	Mean FA in pontine crossing tract on FA skeleton
313	25058	-0.109921	0.0265208	5595	Mean FA in genu of corpus callosum on FA skeleton
314	25059	-0.126012	0.010977	5595	Mean FA in body of corpus callosum on FA skeleton
315	25060	-0.0450762	0.363038	5595	Mean FA in splenium of corpus callosum on FA skeleton
316	25061	-0.105454	0.0333107	5595	Mean FA in fornix on FA skeleton
317	25062	-0.0448921	0.365001	5595	Mean FA in corticospinal tract on FA skeleton (right)
318	25063	-0.0648687	0.190522	5595	Mean FA in corticospinal tract on FA skeleton (left)
319	25064	-0.237159	1.66476e-06	5595	Mean FA in medial lemniscus on FA skeleton (right)
320	25065	-0.251063	3.94004e-07	5595	Mean FA in medial lemniscus on FA skeleton (left)
321	25066	-0.151208	0.00227035	5595	Mean FA in inferior cerebellar peduncle on FA skeleton (right)
322	25067	-0.0946462	0.0561195	5595	Mean FA in inferior cerebellar peduncle on FA skeleton (left)
323	25068	-0.25213	3.51601e-07	5595	Mean FA in superior cerebellar peduncle on FA skeleton (right)
324	25069	-0.265309	8.30575e-08	5595	Mean FA in superior cerebellar peduncle on FA skeleton (left)
325	25070	-0.144728	0.00348384	5595	Mean FA in cerebral peduncle on FA skeleton (right)
326	25071	-0.132142	0.00764765	5595	Mean FA in cerebral peduncle on FA skeleton (left)
327	25072	-0.0766077	0.12211	5595	Mean FA in anterior limb of internal capsule on FA skeleton (right)
328	25073	-0.100075	0.0434144	5595	Mean FA in anterior limb of internal capsule on FA skeleton (left)
329	25074	-0.0819194	0.0982918	5595	Mean FA in posterior limb of internal capsule on FA skeleton (right)
330	25075	-0.0966569	0.0510929	5595	Mean FA in posterior limb of internal capsule on FA skeleton (left)
331	25076	-0.100968	0.0415773	5595	Mean FA in retrolenticular part of internal capsule on FA skeleton (right)
332	25077	-0.162934	0.00100429	5595	Mean FA in retrolenticular part of internal capsule on FA skeleton (left)
333	25078	-0.0972319	0.0497266	5595	Mean FA in anterior corona radiata on FA skeleton (right)
334	25079	-0.12453	0.0119534	5595	Mean FA in anterior corona radiata on FA skeleton (left)
335	25080	-0.0582441	0.23986	5595	Mean FA in superior corona radiata on FA skeleton (right)
336	25081	-0.0704634	0.155039	5595	Mean FA in superior corona radiata on FA skeleton (left)
337	25082	-0.0641623	0.195396	5595	Mean FA in posterior corona radiata on FA skeleton (right)
338	25083	-0.0878235	0.0763326	5595	Mean FA in posterior corona radiata on FA skeleton (left)
339	25084	-0.137642	0.00546381	5595	Mean FA in posterior thalamic radiation on FA skeleton (right)
340	25085	-0.143336	0.00381149	5595	Mean FA in posterior thalamic radiation on FA skeleton (left)
341	25086	-0.0678881	0.170694	5595	Mean FA in sagittal stratum on FA skeleton (right)
342	25087	-0.102276	0.0390037	5595	Mean FA in sagittal stratum on FA skeleton (left)
343	25088	-0.120213	0.0152524	5595	Mean FA in external capsule on FA skeleton (right)
344	25089	-0.104631	0.0347131	5595	Mean FA in external capsule on FA skeleton (left)
345	25090	-0.112476	0.0232022	5595	Mean FA in cingulum cingulate gyrus on FA skeleton (right)
346	25091	-0.1124	0.0232946	5595	Mean FA in cingulum cingulate gyrus on FA skeleton (left)
347	25092	-0.114728	0.020582	5595	Mean FA in cingulum hippocampus on FA skeleton (right)
348	25093	-0.127477	0.0100811	5595	Mean FA in cingulum hippocampus on FA skeleton (left)
349	25094	-0.172021	0.000514766	5595	Mean FA in fornix cres+stria terminalis on FA skeleton (right)
350	25095	-0.177479	0.000339308	5595	Mean FA in fornix cres+stria terminalis on FA skeleton (left)
351	25096	-0.100931	0.0416518	5595	Mean FA in superior longitudinal fasciculus on FA skeleton (right)
352	25097	-0.132129	0.00765357	5595	Mean FA in superior longitudinal fasciculus on FA skeleton (left)
353	25098	-0.174468	0.000427635	5595	Mean FA in superior fronto-occipital fasciculus on FA skeleton (right)
354	25099	-0.163976	0.000931704	5595	Mean FA in superior fronto-occipital fasciculus on FA skeleton (left)
355	25100	-0.13365	0.00698218	5595	Mean FA in uncinate fasciculus on FA skeleton (right)
356	25101	-0.0950753	0.0550134	5595	Mean FA in uncinate fasciculus on FA skeleton (left)
357	25102	-0.0408465	0.409806	5595	Mean FA in tapetum on FA skeleton (right)
358	25103	-0.0236696	0.632923	5595	Mean FA in tapetum on FA skeleton (left)
359	25104	0.0591794	0.232395	5595	Mean MD in middle cerebellar peduncle on FA skeleton
360	25105	0.0251448	0.611885	5595	Mean MD in pontine crossing tract on FA skeleton
361	25106	0.113725	0.0217157	5595	Mean MD in genu of corpus callosum on FA skeleton
362	25107	0.116476	0.0187296	5595	Mean MD in body of corpus callosum on FA skeleton
363	25108	0.0893638	0.0713148	5595	Mean MD in splenium of corpus callosum on FA skeleton
364	25109	0.105803	0.0327315	5595	Mean MD in fornix on FA skeleton
365	25110	0.00901707	0.855623	5595	Mean MD in corticospinal tract on FA skeleton (right)
366	25111	0.0288878	0.559952	5595	Mean MD in corticospinal tract on FA skeleton (left)
367	25112	0.0796648	0.107905	5595	Mean MD in medial lemniscus on FA skeleton (right)
368	25113	0.0906996	0.0671851	5595	Mean MD in medial lemniscus on FA skeleton (left)
369	25114	0.0428287	0.387458	5595	Mean MD in inferior cerebellar peduncle on FA skeleton (right)
370	25115	0.00297289	0.952165	5595	Mean MD in inferior cerebellar peduncle on FA skeleton (left)
371	25116	0.107549	0.0299602	5595	Mean MD in superior cerebellar peduncle on FA skeleton (right)
372	25117	0.142322	0.0040676	5595	Mean MD in superior cerebellar peduncle on FA skeleton (left)
373	25118	0.060211	0.224353	5595	Mean MD in cerebral peduncle on FA skeleton (right)
374	25119	0.0731653	0.139812	5595	Mean MD in cerebral peduncle on FA skeleton (left)
375	25120	0.0400395	0.419119	5595	Mean MD in anterior limb of internal capsule on FA skeleton (right)
376	25121	0.0367351	0.458531	5595	Mean MD in anterior limb of internal capsule on FA skeleton (left)
377	25122	0.0679926	0.170036	5595	Mean MD in posterior limb of internal capsule on FA skeleton (right)
378	25123	0.0902655	0.0685049	5595	Mean MD in posterior limb of internal capsule on FA skeleton (left)
379	25124	0.0875591	0.0772222	5595	Mean MD in retrolenticular part of internal capsule on FA skeleton (right)
380	25125	0.102806	0.0380018	5595	Mean MD in retrolenticular part of internal capsule on FA skeleton (left)
381	25126	0.0780544	0.115216	5595	Mean MD in anterior corona radiata on FA skeleton (right)
382	25127	0.0883379	0.0746259	5595	Mean MD in anterior corona radiata on FA skeleton (left)
383	25128	0.114414	0.0209316	5595	Mean MD in superior corona radiata on FA skeleton (right)
384	25129	0.134147	0.00677417	5595	Mean MD in superior corona radiata on FA skeleton (left)
385	25130	0.123698	0.0125354	5595	Mean MD in posterior corona radiata on FA skeleton (right)
386	25131	0.131699	0.00785386	5595	Mean MD in posterior corona radiata on FA skeleton (left)
387	25132	0.0974302	0.0492628	5595	Mean MD in posterior thalamic radiation on FA skeleton (right)
388	25133	0.114748	0.0205595	5595	Mean MD in posterior thalamic radiation on FA skeleton (left)
389	25134	0.0372892	0.451781	5595	Mean MD in sagittal stratum on FA skeleton (right)
390	25135	0.0678659	0.170834	5595	Mean MD in sagittal stratum on FA skeleton (left)
391	25136	0.111708	0.0241592	5595	Mean MD in external capsule on FA skeleton (right)
392	25137	0.129665	0.00886527	5595	Mean MD in external capsule on FA skeleton (left)
393	25138	0.0535573	0.279809	5595	Mean MD in cingulum cingulate gyrus on FA skeleton (right)
394	25139	0.05454	0.271079	5595	Mean MD in cingulum cingulate gyrus on FA skeleton (left)
395	25140	0.0677431	0.171609	5595	Mean MD in cingulum hippocampus on FA skeleton (right)
396	25141	0.105147	0.0338286	5595	Mean MD in cingulum hippocampus on FA skeleton (left)
397	25142	0.219216	9.54307e-06	5595	Mean MD in fornix cres+stria terminalis on FA skeleton (right)
398	25143	0.25212	3.51979e-07	5595	Mean MD in fornix cres+stria terminalis on FA skeleton (left)
399	25144	0.0993875	0.0448747	5595	Mean MD in superior longitudinal fasciculus on FA skeleton (right)
400	25145	0.130302	0.00853639	5595	Mean MD in superior longitudinal fasciculus on FA skeleton (left)
401	25146	0.0687869	0.165101	5595	Mean MD in superior fronto-occipital fasciculus on FA skeleton (right)
402	25147	0.0982434	0.0473979	5595	Mean MD in superior fronto-occipital fasciculus on FA skeleton (left)
403	25148	0.141586	0.00426312	5595	Mean MD in uncinate fasciculus on FA skeleton (right)
404	25149	0.0751211	0.129527	5595	Mean MD in uncinate fasciculus on FA skeleton (left)
405	25150	0.0560049	0.258415	5595	Mean MD in tapetum on FA skeleton (right)
406	25151	0.0611589	0.217142	5595	Mean MD in tapetum on FA skeleton (left)
407	25152	-0.190239	0.000122422	5595	Mean MO in middle cerebellar peduncle on FA skeleton
408	25153	0.0260562	0.599045	5595	Mean MO in pontine crossing tract on FA skeleton
409	25154	-0.0828684	0.0944556	5595	Mean MO in genu of corpus callosum on FA skeleton
410	25155	-0.155775	0.00166281	5595	Mean MO in body of corpus callosum on FA skeleton
411	25156	-0.0185688	0.707892	5595	Mean MO in splenium of corpus callosum on FA skeleton
412	25157	-0.0703738	0.155564	5595	Mean MO in fornix on FA skeleton
413	25158	-0.00574564	0.907702	5595	Mean MO in corticospinal tract on FA skeleton (right)
414	25159	-0.0478723	0.334034	5595	Mean MO in corticospinal tract on FA skeleton (left)
415	25160	-0.0953944	0.054203	5595	Mean MO in medial lemniscus on FA skeleton (right)
416	25161	-0.119705	0.0156892	5595	Mean MO in medial lemniscus on FA skeleton (left)
417	25162	-0.0802936	0.105152	5595	Mean MO in inferior cerebellar peduncle on FA skeleton (right)
418	25163	-0.0429607	0.385996	5595	Mean MO in inferior cerebellar peduncle on FA skeleton (left)
419	25164	-0.115632	0.019605	5595	Mean MO in superior cerebellar peduncle on FA skeleton (right)
420	25165	-0.0688727	0.164574	5595	Mean MO in superior cerebellar peduncle on FA skeleton (left)
421	25166	-0.0918081	0.0639093	5595	Mean MO in cerebral peduncle on FA skeleton (right)
422	25167	-0.0401199	0.418185	5595	Mean MO in cerebral peduncle on FA skeleton (left)
423	25168	0.0809531	0.102325	5595	Mean MO in anterior limb of internal capsule on FA skeleton (right)
424	25169	0.0446338	0.367767	5595	Mean MO in anterior limb of internal capsule on FA skeleton (left)
425	25170	0.0540989	0.274974	5595	Mean MO in posterior limb of internal capsule on FA skeleton (right)
426	25171	0.0479752	0.332996	5595	Mean MO in posterior limb of internal capsule on FA skeleton (left)
427	25172	-0.0597068	0.228258	5595	Mean MO in retrolenticular part of internal capsule on FA skeleton (right)
428	25173	-0.106673	0.0313257	5595	Mean MO in retrolenticular part of internal capsule on FA skeleton (left)
429	25174	-0.0659589	0.183175	5595	Mean MO in anterior corona radiata on FA skeleton (right)
430	25175	-0.0493356	0.319469	5595	Mean MO in anterior corona radiata on FA skeleton (left)
431	25176	-0.00159772	0.974281	5595	Mean MO in superior corona radiata on FA skeleton (right)
432	25177	-0.00824912	0.8678	5595	Mean MO in superior corona radiata on FA skeleton (left)
433	25178	0.00867691	0.861013	5595	Mean MO in posterior corona radiata on FA skeleton (right)
434	25179	0.042326	0.393053	5595	Mean MO in posterior corona radiata on FA skeleton (left)
435	25180	-0.110381	0.0258943	5595	Mean MO in posterior thalamic radiation on FA skeleton (right)
436	25181	-0.0713757	0.149762	5595	Mean MO in posterior thalamic radiation on FA skeleton (left)
437	25182	-0.0556915	0.261089	5595	Mean MO in sagittal stratum on FA skeleton (right)
438	25183	-0.0187103	0.70577	5595	Mean MO in sagittal stratum on FA skeleton (left)
439	25184	0.00868502	0.860884	5595	Mean MO in external capsule on FA skeleton (right)
440	25185	0.0602099	0.224362	5595	Mean MO in external capsule on FA skeleton (left)
441	25186	-0.0547654	0.269103	5595	Mean MO in cingulum cingulate gyrus on FA skeleton (right)
442	25187	-0.0859891	0.0826798	5595	Mean MO in cingulum cingulate gyrus on FA skeleton (left)
443	25188	-0.0821819	0.0972184	5595	Mean MO in cingulum hippocampus on FA skeleton (right)
444	25189	-0.0577738	0.243677	5595	Mean MO in cingulum hippocampus on FA skeleton (left)
445	25190	-0.0555341	0.262439	5595	Mean MO in fornix cres+stria terminalis on FA skeleton (right)
446	25191	-0.0369898	0.455421	5595	Mean MO in fornix cres+stria terminalis on FA skeleton (left)
447	25192	-0.0343739	0.48792	5595	Mean MO in superior longitudinal fasciculus on FA skeleton (right)
448	25193	-0.0452478	0.361213	5595	Mean MO in superior longitudinal fasciculus on FA skeleton (left)
449	25194	0.064226	0.194953	5595	Mean MO in superior fronto-occipital fasciculus on FA skeleton (right)
450	25195	0.014741	0.766124	5595	Mean MO in superior fronto-occipital fasciculus on FA skeleton (left)
451	25196	0.0179951	0.716521	5595	Mean MO in uncinate fasciculus on FA skeleton (right)
452	25197	-0.0081146	0.869937	5595	Mean MO in uncinate fasciculus on FA skeleton (left)
453	25198	-0.0606639	0.220887	5595	Mean MO in tapetum on FA skeleton (right)
454	25199	-0.0468952	0.343995	5595	Mean MO in tapetum on FA skeleton (left)
455	25200	0.00813639	0.869591	5595	Mean L1 in middle cerebellar peduncle on FA skeleton
456	25201	0.022458	0.650428	5595	Mean L1 in pontine crossing tract on FA skeleton
457	25202	0.0766039	0.122129	5595	Mean L1 in genu of corpus callosum on FA skeleton
458	25203	0.0616313	0.213611	5595	Mean L1 in body of corpus callosum on FA skeleton
459	25204	0.079136	0.110264	5595	Mean L1 in splenium of corpus callosum on FA skeleton
460	25205	0.108233	0.0289319	5595	Mean L1 in fornix on FA skeleton
461	25206	-0.0155085	0.754329	5595	Mean L1 in corticospinal tract on FA skeleton (right)
462	25207	-0.00329318	0.947019	5595	Mean L1 in corticospinal tract on FA skeleton (left)
463	25208	-0.0377507	0.446201	5595	Mean L1 in medial lemniscus on FA skeleton (right)
464	25209	-0.0333662	0.500766	5595	Mean L1 in medial lemniscus on FA skeleton (left)
465	25210	-0.10219	0.0391685	5595	Mean L1 in inferior cerebellar peduncle on FA skeleton (right)
466	25211	-0.0787079	0.112203	5595	Mean L1 in inferior cerebellar peduncle on FA skeleton (left)
467	25212	-0.051366	0.299957	5595	Mean L1 in superior cerebellar peduncle on FA skeleton (right)
468	25213	-0.0299133	0.546104	5595	Mean L1 in superior cerebellar peduncle on FA skeleton (left)
469	25214	-0.0342988	0.488872	5595	Mean L1 in cerebral peduncle on FA skeleton (right)
470	25215	-0.0198081	0.689381	5595	Mean L1 in cerebral peduncle on FA skeleton (left)
471	25216	0.00975732	0.843917	5595	Mean L1 in anterior limb of internal capsule on FA skeleton (right)
472	25217	-0.00984471	0.842537	5595	Mean L1 in anterior limb of internal capsule on FA skeleton (left)
473	25218	0.00939229	0.849685	5595	Mean L1 in posterior limb of internal capsule on FA skeleton (right)
474	25219	0.0186763	0.706279	5595	Mean L1 in posterior limb of internal capsule on FA skeleton (left)
475	25220	0.0183757	0.710793	5595	Mean L1 in retrolenticular part of internal capsule on FA skeleton (right)
476	25221	-0.0144391	0.770778	5595	Mean L1 in retrolenticular part of internal capsule on FA skeleton (left)
477	25222	0.0210264	0.671362	5595	Mean L1 in anterior corona radiata on FA skeleton (right)
478	25223	0.0243052	0.623821	5595	Mean L1 in anterior corona radiata on FA skeleton (left)
479	25224	0.0914196	0.0650421	5595	Mean L1 in superior corona radiata on FA skeleton (right)
480	25225	0.101059	0.0413928	5595	Mean L1 in superior corona radiata on FA skeleton (left)
481	25226	0.118117	0.0171254	5595	Mean L1 in posterior corona radiata on FA skeleton (right)
482	25227	0.116304	0.018905	5595	Mean L1 in posterior corona radiata on FA skeleton (left)
483	25228	0.00604434	0.902927	5595	Mean L1 in posterior thalamic radiation on FA skeleton (right)
484	25229	0.0291256	0.556725	5595	Mean L1 in posterior thalamic radiation on FA skeleton (left)
485	25230	-0.0182587	0.712552	5595	Mean L1 in sagittal stratum on FA skeleton (right)
486	25231	-0.00324979	0.947716	5595	Mean L1 in sagittal stratum on FA skeleton (left)
487	25232	0.0621087	0.210084	5595	Mean L1 in external capsule on FA skeleton (right)
488	25233	0.0976246	0.0488114	5595	Mean L1 in external capsule on FA skeleton (left)
489	25234	-0.0244037	0.622416	5595	Mean L1 in cingulum cingulate gyrus on FA skeleton (right)
490	25235	-0.0282598	0.568514	5595	Mean L1 in cingulum cingulate gyrus on FA skeleton (left)
491	25236	-0.0369303	0.456146	5595	Mean L1 in cingulum hippocampus on FA skeleton (right)
492	25237	-0.00345147	0.944477	5595	Mean L1 in cingulum hippocampus on FA skeleton (left)
493	25238	0.144626	0.00350691	5595	Mean L1 in fornix cres+stria terminalis on FA skeleton (right)
494	25239	0.154563	0.00180749	5595	Mean L1 in fornix cres+stria terminalis on FA skeleton (left)
495	25240	0.0462792	0.350371	5595	Mean L1 in superior longitudinal fasciculus on FA skeleton (right)
496	25241	0.0550895	0.266279	5595	Mean L1 in superior longitudinal fasciculus on FA skeleton (left)
497	25242	-0.0118936	0.810336	5595	Mean L1 in superior fronto-occipital fasciculus on FA skeleton (right)
498	25243	0.0373068	0.451566	5595	Mean L1 in superior fronto-occipital fasciculus on FA skeleton (left)
499	25244	0.0349215	0.481016	5595	Mean L1 in uncinate fasciculus on FA skeleton (right)
500	25245	0.0155119	0.754278	5595	Mean L1 in uncinate fasciculus on FA skeleton (left)
501	670	-0.930664	3.73981e-07	215934	Type of accommodation lived in
502	25246	0.0484752	0.327982	5595	Mean L1 in tapetum on FA skeleton (right)
503	25247	0.0513967	0.299668	5595	Mean L1 in tapetum on FA skeleton (left)
504	25248	0.106854	0.0310394	5595	Mean L2 in middle cerebellar peduncle on FA skeleton
505	25249	0.0122741	0.804389	5595	Mean L2 in pontine crossing tract on FA skeleton
506	25250	0.117735	0.0174882	5595	Mean L2 in genu of corpus callosum on FA skeleton
507	25251	0.132869	0.00732016	5595	Mean L2 in body of corpus callosum on FA skeleton
508	25252	0.0463671	0.349457	5595	Mean L2 in splenium of corpus callosum on FA skeleton
509	25253	0.107162	0.0305563	5595	Mean L2 in fornix on FA skeleton
510	25254	0.0230968	0.641174	5595	Mean L2 in corticospinal tract on FA skeleton (right)
511	680	0.738346	8.03131e-08	215483	Own or rent accommodation lived in
512	25255	0.0523796	0.29052	5595	Mean L2 in corticospinal tract on FA skeleton (left)
513	25256	0.172353	0.000502054	5595	Mean L2 in medial lemniscus on FA skeleton (right)
514	25257	0.18667	0.000163859	5595	Mean L2 in medial lemniscus on FA skeleton (left)
515	25258	0.122622	0.0133242	5595	Mean L2 in inferior cerebellar peduncle on FA skeleton (right)
516	25259	0.0536079	0.279355	5595	Mean L2 in inferior cerebellar peduncle on FA skeleton (left)
517	25260	0.216257	1.25734e-05	5595	Mean L2 in superior cerebellar peduncle on FA skeleton (right)
518	25261	0.230043	3.37858e-06	5595	Mean L2 in superior cerebellar peduncle on FA skeleton (left)
519	25262	0.108446	0.0286177	5595	Mean L2 in cerebral peduncle on FA skeleton (right)
520	25263	0.0930086	0.0605117	5595	Mean L2 in cerebral peduncle on FA skeleton (left)
521	25264	0.0120732	0.807528	5595	Mean L2 in anterior limb of internal capsule on FA skeleton (right)
522	25265	0.0360902	0.466458	5595	Mean L2 in anterior limb of internal capsule on FA skeleton (left)
523	25266	0.0289848	0.558633	5595	Mean L2 in posterior limb of internal capsule on FA skeleton (right)
524	25267	0.0438501	0.376238	5595	Mean L2 in posterior limb of internal capsule on FA skeleton (left)
525	25268	0.106056	0.0323179	5595	Mean L2 in retrolenticular part of internal capsule on FA skeleton (right)
526	25269	0.154995	0.00175466	5595	Mean L2 in retrolenticular part of internal capsule on FA skeleton (left)
527	25270	0.103539	0.0366495	5595	Mean L2 in anterior corona radiata on FA skeleton (right)
528	25271	0.104351	0.0352014	5595	Mean L2 in anterior corona radiata on FA skeleton (left)
529	25272	0.106485	0.0316249	5595	Mean L2 in superior corona radiata on FA skeleton (right)
530	699	0.105228	1.26522e-37	215511	Length of time at current address
531	25273	0.128638	0.00941887	5595	Mean L2 in superior corona radiata on FA skeleton (left)
532	25274	0.110321	0.0259749	5595	Mean L2 in posterior corona radiata on FA skeleton (right)
533	25275	0.120684	0.0148574	5595	Mean L2 in posterior corona radiata on FA skeleton (left)
534	25276	0.140488	0.00457074	5595	Mean L2 in posterior thalamic radiation on FA skeleton (right)
535	25277	0.153034	0.00200649	5595	Mean L2 in posterior thalamic radiation on FA skeleton (left)
536	25278	0.0689818	0.163906	5595	Mean L2 in sagittal stratum on FA skeleton (right)
537	25279	0.0856493	0.0839016	5595	Mean L2 in sagittal stratum on FA skeleton (left)
538	25280	0.10404	0.0357493	5595	Mean L2 in external capsule on FA skeleton (right)
539	25281	0.105281	0.0336028	5595	Mean L2 in external capsule on FA skeleton (left)
540	709	-0.047123	9.67949e-09	214839	Number in household
541	25282	0.0719346	0.146599	5595	Mean L2 in cingulum cingulate gyrus on FA skeleton (right)
542	25283	0.0907211	0.0671202	5595	Mean L2 in cingulum cingulate gyrus on FA skeleton (left)
543	25284	0.121087	0.0145265	5595	Mean L2 in cingulum hippocampus on FA skeleton (right)
544	25285	0.134984	0.00643711	5595	Mean L2 in cingulum hippocampus on FA skeleton (left)
545	25286	0.206934	2.93022e-05	5595	Mean L2 in fornix cres+stria terminalis on FA skeleton (right)
546	25287	0.224426	5.82367e-06	5595	Mean L2 in fornix cres+stria terminalis on FA skeleton (left)
547	25288	0.111882	0.02394	5595	Mean L2 in superior longitudinal fasciculus on FA skeleton (right)
548	25289	0.133813	0.00691344	5595	Mean L2 in superior longitudinal fasciculus on FA skeleton (left)
549	25290	0.0749587	0.130358	5595	Mean L2 in superior fronto-occipital fasciculus on FA skeleton (right)
550	25291	0.102079	0.0393819	5595	Mean L2 in superior fronto-occipital fasciculus on FA skeleton (left)
551	25292	0.126977	0.0103795	5595	Mean L2 in uncinate fasciculus on FA skeleton (right)
552	25293	0.0762946	0.123644	5595	Mean L2 in uncinate fasciculus on FA skeleton (left)
553	25294	0.0628008	0.205047	5595	Mean L2 in tapetum on FA skeleton (right)
554	25295	0.0706852	0.153743	5595	Mean L2 in tapetum on FA skeleton (left)
555	25296	0.0479122	0.333632	5595	Mean L3 in middle cerebellar peduncle on FA skeleton
556	25297	0.0404769	0.414056	5595	Mean L3 in pontine crossing tract on FA skeleton
557	25298	0.107757	0.0296446	5595	Mean L3 in genu of corpus callosum on FA skeleton
558	25299	0.114385	0.0209636	5595	Mean L3 in body of corpus callosum on FA skeleton
559	728	0.961754	1.02506e-10	215483	Number of vehicles in household
560	25300	0.0732861	0.139159	5595	Mean L3 in splenium of corpus callosum on FA skeleton
561	25301	0.0993847	0.0448806	5595	Mean L3 in fornix on FA skeleton
562	25302	0.0273973	0.580375	5595	Mean L3 in corticospinal tract on FA skeleton (right)
563	25303	0.0445291	0.368891	5595	Mean L3 in corticospinal tract on FA skeleton (left)
564	25304	0.139507	0.00486256	5595	Mean L3 in medial lemniscus on FA skeleton (right)
565	25305	0.156212	0.00161333	5595	Mean L3 in medial lemniscus on FA skeleton (left)
566	25306	0.121037	0.0145667	5595	Mean L3 in inferior cerebellar peduncle on FA skeleton (right)
567	25307	0.0495833	0.317044	5595	Mean L3 in inferior cerebellar peduncle on FA skeleton (left)
568	25308	0.204512	3.63002e-05	5595	Mean L3 in superior cerebellar peduncle on FA skeleton (right)
569	738	-0.810524	4.68559e-142	215483	Average total household income before tax
570	25309	0.248578	5.1263e-07	5595	Mean L3 in superior cerebellar peduncle on FA skeleton (left)
571	25310	0.13729	0.00558447	5595	Mean L3 in cerebral peduncle on FA skeleton (right)
572	25311	0.151521	0.002223	5595	Mean L3 in cerebral peduncle on FA skeleton (left)
573	25312	0.085362	0.0849456	5595	Mean L3 in anterior limb of internal capsule on FA skeleton (right)
574	25313	0.0801368	0.105833	5595	Mean L3 in anterior limb of internal capsule on FA skeleton (left)
575	25314	0.132951	0.0072838	5595	Mean L3 in posterior limb of internal capsule on FA skeleton (right)
576	25315	0.153139	0.00199215	5595	Mean L3 in posterior limb of internal capsule on FA skeleton (left)
577	25316	0.100768	0.041982	5595	Mean L3 in retrolenticular part of internal capsule on FA skeleton (right)
578	25317	0.131375	0.00800763	5595	Mean L3 in retrolenticular part of internal capsule on FA skeleton (left)
579	25318	0.0862069	0.0819046	5595	Mean L3 in anterior corona radiata on FA skeleton (right)
580	25319	0.110167	0.0261846	5595	Mean L3 in anterior corona radiata on FA skeleton (left)
581	25320	0.100987	0.0415379	5595	Mean L3 in superior corona radiata on FA skeleton (right)
582	25321	0.11576	0.0194698	5595	Mean L3 in superior corona radiata on FA skeleton (left)
583	25322	0.113043	0.0225166	5595	Mean L3 in posterior corona radiata on FA skeleton (right)
584	25323	0.13113	0.00812588	5595	Mean L3 in posterior corona radiata on FA skeleton (left)
585	25324	0.112242	0.0234903	5595	Mean L3 in posterior thalamic radiation on FA skeleton (right)
586	25325	0.131474	0.0079603	5595	Mean L3 in posterior thalamic radiation on FA skeleton (left)
587	25326	0.0490089	0.322684	5595	Mean L3 in sagittal stratum on FA skeleton (right)
588	757	-0.0243314	0.0241279	116360	Time employed in main current job
589	25327	0.0956368	0.0535939	5595	Mean L3 in sagittal stratum on FA skeleton (left)
590	25328	0.145173	0.00338455	5595	Mean L3 in external capsule on FA skeleton (right)
591	25329	0.155496	0.00169512	5595	Mean L3 in external capsule on FA skeleton (left)
592	25330	0.113339	0.0221653	5595	Mean L3 in cingulum cingulate gyrus on FA skeleton (right)
593	25331	0.0954722	0.0540068	5595	Mean L3 in cingulum cingulate gyrus on FA skeleton (left)
594	25332	0.0984036	0.0470374	5595	Mean L3 in cingulum hippocampus on FA skeleton (right)
595	25333	0.135709	0.0061572	5595	Mean L3 in cingulum hippocampus on FA skeleton (left)
596	25334	0.217737	1.09584e-05	5595	Mean L3 in fornix cres+stria terminalis on FA skeleton (right)
597	25335	0.257667	1.93395e-07	5595	Mean L3 in fornix cres+stria terminalis on FA skeleton (left)
598	767	-0.192125	3.25465e-70	114980	Length of working week for main job
599	25336	0.105369	0.0334539	5595	Mean L3 in superior longitudinal fasciculus on FA skeleton (right)
600	25337	0.151309	0.00225497	5595	Mean L3 in superior longitudinal fasciculus on FA skeleton (left)
601	25338	0.132996	0.00726408	5595	Mean L3 in superior fronto-occipital fasciculus on FA skeleton (right)
602	25339	0.136397	0.005902	5595	Mean L3 in superior fronto-occipital fasciculus on FA skeleton (left)
603	25340	0.178735	0.000307774	5595	Mean L3 in uncinate fasciculus on FA skeleton (right)
604	25341	0.108967	0.0278608	5595	Mean L3 in uncinate fasciculus on FA skeleton (left)
605	25342	0.0450792	0.363005	5595	Mean L3 in tapetum on FA skeleton (right)
606	25343	0.0487963	0.324788	5595	Mean L3 in tapetum on FA skeleton (left)
607	25344	0.0254397	0.607717	5595	Mean ICVF in middle cerebellar peduncle on FA skeleton
608	777	0.0237323	0.0282979	115646	Frequency of travelling from home to job workplace
609	25345	-0.00866083	0.861268	5595	Mean ICVF in pontine crossing tract on FA skeleton
610	25346	-0.0212758	0.667695	5595	Mean ICVF in genu of corpus callosum on FA skeleton
611	25347	-0.0189882	0.701607	5595	Mean ICVF in body of corpus callosum on FA skeleton
612	25348	-0.0680448	0.169708	5595	Mean ICVF in splenium of corpus callosum on FA skeleton
613	25349	-0.05242	0.290148	5595	Mean ICVF in fornix on FA skeleton
614	25350	-0.00857783	0.862584	5595	Mean ICVF in corticospinal tract on FA skeleton (right)
615	25351	-0.00648741	0.895851	5595	Mean ICVF in corticospinal tract on FA skeleton (left)
616	25352	-0.0362018	0.465081	5595	Mean ICVF in medial lemniscus on FA skeleton (right)
617	25353	-0.00336329	0.945893	5595	Mean ICVF in medial lemniscus on FA skeleton (left)
618	25354	0.0213758	0.666229	5595	Mean ICVF in inferior cerebellar peduncle on FA skeleton (right)
619	25355	0.00606869	0.902538	5595	Mean ICVF in inferior cerebellar peduncle on FA skeleton (left)
620	25356	-0.0900971	0.0690226	5595	Mean ICVF in superior cerebellar peduncle on FA skeleton (right)
621	25357	-0.119406	0.0159511	5595	Mean ICVF in superior cerebellar peduncle on FA skeleton (left)
622	25358	0.00883988	0.85843	5595	Mean ICVF in cerebral peduncle on FA skeleton (right)
623	25359	0.0013974	0.977505	5595	Mean ICVF in cerebral peduncle on FA skeleton (left)
624	25360	-0.00757518	0.878513	5595	Mean ICVF in anterior limb of internal capsule on FA skeleton (right)
625	25361	-0.0248005	0.616768	5595	Mean ICVF in anterior limb of internal capsule on FA skeleton (left)
626	25362	-0.0131872	0.790165	5595	Mean ICVF in posterior limb of internal capsule on FA skeleton (right)
627	796	-0.0735522	9.12007e-11	104499	Distance between home and job workplace
628	25364	-0.0422888	0.39347	5595	Mean ICVF in retrolenticular part of internal capsule on FA skeleton (right)
629	25365	-0.056767	0.251991	5595	Mean ICVF in retrolenticular part of internal capsule on FA skeleton (left)
630	25366	-0.0437229	0.377624	5595	Mean ICVF in anterior corona radiata on FA skeleton (right)
631	25367	-0.0566114	0.253294	5595	Mean ICVF in anterior corona radiata on FA skeleton (left)
632	25368	-0.0830315	0.0938087	5595	Mean ICVF in superior corona radiata on FA skeleton (right)
633	25369	-0.08788	0.0761436	5595	Mean ICVF in superior corona radiata on FA skeleton (left)
634	25370	-0.0651632	0.188516	5595	Mean ICVF in posterior corona radiata on FA skeleton (right)
635	25371	-0.0667275	0.178124	5595	Mean ICVF in posterior corona radiata on FA skeleton (left)
636	25372	-0.0440503	0.374063	5595	Mean ICVF in posterior thalamic radiation on FA skeleton (right)
637	806	-1.33816	0.00147706	116756	Job involves mainly walking or standing
638	25374	0.00198825	0.967998	5595	Mean ICVF in sagittal stratum on FA skeleton (right)
639	25375	-0.0461466	0.351754	5595	Mean ICVF in sagittal stratum on FA skeleton (left)
640	25376	-0.0604641	0.222411	5595	Mean ICVF in external capsule on FA skeleton (right)
641	25377	-0.0863394	0.0814359	5595	Mean ICVF in external capsule on FA skeleton (left)
642	25378	-0.0828472	0.0945398	5595	Mean ICVF in cingulum cingulate gyrus on FA skeleton (right)
643	25379	-0.0674154	0.173692	5595	Mean ICVF in cingulum cingulate gyrus on FA skeleton (left)
644	25380	-0.0280494	0.571397	5595	Mean ICVF in cingulum hippocampus on FA skeleton (right)
645	25381	-0.0756835	0.126682	5595	Mean ICVF in cingulum hippocampus on FA skeleton (left)
646	25382	0.0161001	0.745277	5595	Mean ICVF in fornix cres+stria terminalis on FA skeleton (right)
647	816	-1.53737	0.00189297	116756	Job involves heavy manual or physical work
648	25384	-0.042737	0.388475	5595	Mean ICVF in superior longitudinal fasciculus on FA skeleton (right)
649	25385	-0.0849769	0.0863616	5595	Mean ICVF in superior longitudinal fasciculus on FA skeleton (left)
650	25386	-0.0619729	0.211083	5595	Mean ICVF in superior fronto-occipital fasciculus on FA skeleton (right)
651	25387	-0.109083	0.0276944	5595	Mean ICVF in superior fronto-occipital fasciculus on FA skeleton (left)
652	25388	-0.133237	0.00715892	5595	Mean ICVF in uncinate fasciculus on FA skeleton (right)
653	25389	-0.087701	0.0767436	5595	Mean ICVF in uncinate fasciculus on FA skeleton (left)
654	25390	-0.0217774	0.660347	5595	Mean ICVF in tapetum on FA skeleton (right)
655	25391	0.0343815	0.487824	5595	Mean ICVF in tapetum on FA skeleton (left)
656	25392	0.073349	0.13882	5595	Mean OD in middle cerebellar peduncle on FA skeleton
657	826	-1.01445	0.00893063	116756	Job involves shift work
658	25394	0.0562333	0.256478	5595	Mean OD in genu of corpus callosum on FA skeleton
659	25395	0.0922676	0.0625908	5595	Mean OD in body of corpus callosum on FA skeleton
660	25396	0.0182637	0.712477	5595	Mean OD in splenium of corpus callosum on FA skeleton
661	25397	0.0989538	0.0458175	5595	Mean OD in fornix on FA skeleton
662	25398	0.0429353	0.386278	5595	Mean OD in corticospinal tract on FA skeleton (right)
663	25399	0.06405	0.196179	5595	Mean OD in corticospinal tract on FA skeleton (left)
664	25400	0.158173	0.00140751	5595	Mean OD in medial lemniscus on FA skeleton (right)
665	25401	0.203546	3.95146e-05	5595	Mean OD in medial lemniscus on FA skeleton (left)
666	25402	0.14731	0.00294289	5595	Mean OD in inferior cerebellar peduncle on FA skeleton (right)
667	25403	0.100562	0.0424032	5595	Mean OD in inferior cerebellar peduncle on FA skeleton (left)
668	25404	0.22841	3.96335e-06	5595	Mean OD in superior cerebellar peduncle on FA skeleton (right)
669	25405	0.224858	5.58761e-06	5595	Mean OD in superior cerebellar peduncle on FA skeleton (left)
670	25406	0.103821	0.0361416	5595	Mean OD in cerebral peduncle on FA skeleton (right)
671	25407	0.10607	0.0322951	5595	Mean OD in cerebral peduncle on FA skeleton (left)
672	25408	0.0972626	0.0496545	5595	Mean OD in anterior limb of internal capsule on FA skeleton (right)
673	25409	0.145151	0.00338944	5595	Mean OD in anterior limb of internal capsule on FA skeleton (left)
674	25410	0.0255894	0.605606	5595	Mean OD in posterior limb of internal capsule on FA skeleton (right)
675	25411	0.00784754	0.874181	5595	Mean OD in posterior limb of internal capsule on FA skeleton (left)
676	845	-0.244505	9.03653e-134	149411	Age completed full time education
677	25413	0.11648	0.0187256	5595	Mean OD in retrolenticular part of internal capsule on FA skeleton (left)
678	25414	0.0723865	0.144078	5595	Mean OD in anterior corona radiata on FA skeleton (right)
679	25415	0.0930149	0.0604942	5595	Mean OD in anterior corona radiata on FA skeleton (left)
680	25416	-0.0347382	0.483321	5595	Mean OD in superior corona radiata on FA skeleton (right)
681	25417	-0.0386686	0.435222	5595	Mean OD in superior corona radiata on FA skeleton (left)
682	25418	0.01124	0.820576	5595	Mean OD in posterior corona radiata on FA skeleton (right)
683	25419	-0.0382504	0.440206	5595	Mean OD in posterior corona radiata on FA skeleton (left)
684	25420	0.119509	0.0158602	5595	Mean OD in posterior thalamic radiation on FA skeleton (right)
685	25421	0.0859144	0.0829472	5595	Mean OD in posterior thalamic radiation on FA skeleton (left)
686	25422	0.0828589	0.0944933	5595	Mean OD in sagittal stratum on FA skeleton (right)
687	25423	0.0694928	0.160806	5595	Mean OD in sagittal stratum on FA skeleton (left)
688	25424	0.0576635	0.244578	5595	Mean OD in external capsule on FA skeleton (right)
689	25425	0.0283488	0.567297	5595	Mean OD in external capsule on FA skeleton (left)
690	25426	0.134948	0.00645122	5595	Mean OD in cingulum cingulate gyrus on FA skeleton (right)
691	25427	0.121528	0.0141715	5595	Mean OD in cingulum cingulate gyrus on FA skeleton (left)
692	25428	0.0823785	0.0964205	5595	Mean OD in cingulum hippocampus on FA skeleton (right)
693	25429	0.0501606	0.311443	5595	Mean OD in cingulum hippocampus on FA skeleton (left)
694	25430	0.0811937	0.101308	5595	Mean OD in fornix cres+stria terminalis on FA skeleton (right)
695	864	0.174877	4.50319e-100	212070	Number of days/week walked 10+ minutes
696	25432	0.0716576	0.14816	5595	Mean OD in superior longitudinal fasciculus on FA skeleton (right)
697	25433	0.096623	0.0511742	5595	Mean OD in superior longitudinal fasciculus on FA skeleton (left)
698	25434	0.105113	0.0338869	5595	Mean OD in superior fronto-occipital fasciculus on FA skeleton (right)
699	25435	0.0981833	0.0475334	5595	Mean OD in superior fronto-occipital fasciculus on FA skeleton (left)
700	25436	0.0174083	0.725386	5595	Mean OD in uncinate fasciculus on FA skeleton (right)
701	25437	0.0553114	0.264358	5595	Mean OD in uncinate fasciculus on FA skeleton (left)
702	25438	0.0666621	0.17855	5595	Mean OD in tapetum on FA skeleton (right)
703	25439	0.0631399	0.202612	5595	Mean OD in tapetum on FA skeleton (left)
704	25440	0.0794119	0.109028	5595	Mean ISOVF in middle cerebellar peduncle on FA skeleton
705	874	-0.0769653	4.76815e-18	180307	Duration of walks
706	25442	0.146963	0.0030108	5595	Mean ISOVF in genu of corpus callosum on FA skeleton
707	25443	0.138264	0.00525629	5595	Mean ISOVF in body of corpus callosum on FA skeleton
708	25444	0.0607506	0.220227	5595	Mean ISOVF in splenium of corpus callosum on FA skeleton
709	25445	0.125014	0.0116262	5595	Mean ISOVF in fornix on FA skeleton
710	25446	0.0146252	0.767908	5595	Mean ISOVF in corticospinal tract on FA skeleton (right)
711	25447	0.0240124	0.628007	5595	Mean ISOVF in corticospinal tract on FA skeleton (left)
712	25448	0.0878581	0.0762167	5595	Mean ISOVF in medial lemniscus on FA skeleton (right)
713	25449	0.115105	0.0201692	5595	Mean ISOVF in medial lemniscus on FA skeleton (left)
714	25450	0.0890877	0.0721939	5595	Mean ISOVF in inferior cerebellar peduncle on FA skeleton (right)
715	884	0.280463	2.43196e-245	203501	Number of days/week of moderate physical activity 10+ minutes
716	25452	0.0881634	0.0752012	5595	Mean ISOVF in superior cerebellar peduncle on FA skeleton (right)
717	25453	0.120371	0.0151188	5595	Mean ISOVF in superior cerebellar peduncle on FA skeleton (left)
718	25454	0.0744339	0.133072	5595	Mean ISOVF in cerebral peduncle on FA skeleton (right)
719	25455	0.101449	0.0406136	5595	Mean ISOVF in cerebral peduncle on FA skeleton (left)
720	25456	0.0790636	0.11059	5595	Mean ISOVF in anterior limb of internal capsule on FA skeleton (right)
721	25457	0.059733	0.228054	5595	Mean ISOVF in anterior limb of internal capsule on FA skeleton (left)
722	25458	0.0924657	0.0620291	5595	Mean ISOVF in posterior limb of internal capsule on FA skeleton (right)
723	25459	0.0839396	0.0902706	5595	Mean ISOVF in posterior limb of internal capsule on FA skeleton (left)
724	25460	0.104126	0.0355982	5595	Mean ISOVF in retrolenticular part of internal capsule on FA skeleton (right)
725	894	0.0676553	8.11254e-13	156101	Duration of moderate activity
726	25462	0.10556	0.0331349	5595	Mean ISOVF in anterior corona radiata on FA skeleton (right)
727	25463	0.120797	0.0147642	5595	Mean ISOVF in anterior corona radiata on FA skeleton (left)
728	25464	0.101223	0.0410644	5595	Mean ISOVF in superior corona radiata on FA skeleton (right)
729	25465	0.118892	0.0164107	5595	Mean ISOVF in superior corona radiata on FA skeleton (left)
730	25466	0.141888	0.00418199	5595	Mean ISOVF in posterior corona radiata on FA skeleton (right)
731	25467	0.151037	0.00229665	5595	Mean ISOVF in posterior corona radiata on FA skeleton (left)
732	25468	0.0950822	0.054996	5595	Mean ISOVF in posterior thalamic radiation on FA skeleton (right)
733	25469	0.110294	0.0260119	5595	Mean ISOVF in posterior thalamic radiation on FA skeleton (left)
734	25470	0.100678	0.0421662	5595	Mean ISOVF in sagittal stratum on FA skeleton (right)
735	904	-0.116944	2.23411e-44	204336	Number of days/week of vigorous physical activity 10+ minutes
736	25472	0.188757	0.000138256	5595	Mean ISOVF in external capsule on FA skeleton (right)
737	25473	0.166711	0.000763686	5595	Mean ISOVF in external capsule on FA skeleton (left)
738	25474	-0.00712804	0.885633	5595	Mean ISOVF in cingulum cingulate gyrus on FA skeleton (right)
739	25475	-0.000345665	0.994435	5595	Mean ISOVF in cingulum cingulate gyrus on FA skeleton (left)
740	25476	0.0809593	0.102298	5595	Mean ISOVF in cingulum hippocampus on FA skeleton (right)
741	25477	0.0756056	0.127072	5595	Mean ISOVF in cingulum hippocampus on FA skeleton (left)
742	25478	0.232285	2.70933e-06	5595	Mean ISOVF in fornix cres+stria terminalis on FA skeleton (right)
743	25479	0.260145	1.47414e-07	5595	Mean ISOVF in fornix cres+stria terminalis on FA skeleton (left)
744	25480	0.12103	0.0145725	5595	Mean ISOVF in superior longitudinal fasciculus on FA skeleton (right)
745	914	0.0439334	6.96238e-05	109576	Duration of vigorous activity
746	25482	0.0579528	0.242219	5595	Mean ISOVF in superior fronto-occipital fasciculus on FA skeleton (right)
747	25483	0.072506	0.143417	5595	Mean ISOVF in superior fronto-occipital fasciculus on FA skeleton (left)
748	25484	0.0760773	0.124718	5595	Mean ISOVF in uncinate fasciculus on FA skeleton (right)
749	25485	0.103215	0.0372418	5595	Mean ISOVF in uncinate fasciculus on FA skeleton (left)
750	25486	0.0497139	0.315771	5595	Mean ISOVF in tapetum on FA skeleton (right)
751	25487	0.0769464	0.120468	5595	Mean ISOVF in tapetum on FA skeleton (left)
752	25488	-0.0709753	0.152061	5595	Weighted-mean FA in tract acoustic radiation (left)
753	25489	-0.0582091	0.240143	5595	Weighted-mean FA in tract acoustic radiation (right)
754	25490	-0.0650319	0.189409	5595	Weighted-mean FA in tract anterior thalamic radiation (left)
755	924	-1.83412	1.31112e-19	215224	Usual walking pace
756	25492	-0.0195656	0.692989	5595	Weighted-mean FA in tract cingulate gyrus part of cingulum (left)
757	25493	-0.0580824	0.241167	5595	Weighted-mean FA in tract cingulate gyrus part of cingulum (right)
758	25494	-0.0083879	0.865597	5595	Weighted-mean FA in tract parahippocampal part of cingulum (left)
759	25495	-0.107676	0.0297672	5595	Weighted-mean FA in tract parahippocampal part of cingulum (right)
760	25496	-0.0149945	0.762222	5595	Weighted-mean FA in tract corticospinal tract (left)
761	25497	-0.00384883	0.938096	5595	Weighted-mean FA in tract corticospinal tract (right)
762	25498	0.00141038	0.977296	5595	Weighted-mean FA in tract forceps major
763	25499	-0.0552304	0.265059	5595	Weighted-mean FA in tract forceps minor
764	25500	-0.101731	0.0400582	5595	Weighted-mean FA in tract inferior fronto-occipital fasciculus (left)
765	25501	-0.0878007	0.0764089	5595	Weighted-mean FA in tract inferior fronto-occipital fasciculus (right)
766	25502	-0.105872	0.032618	5595	Weighted-mean FA in tract inferior longitudinal fasciculus (left)
767	25503	-0.110267	0.0260479	5595	Weighted-mean FA in tract inferior longitudinal fasciculus (right)
768	25504	0.0587688	0.235651	5595	Weighted-mean FA in tract middle cerebellar peduncle
769	25505	-0.143064	0.00387885	5595	Weighted-mean FA in tract medial lemniscus (left)
770	25506	-0.12957	0.00891503	5595	Weighted-mean FA in tract medial lemniscus (right)
771	25507	-0.103273	0.0371349	5595	Weighted-mean FA in tract posterior thalamic radiation (left)
772	25508	-0.118086	0.0171551	5595	Weighted-mean FA in tract posterior thalamic radiation (right)
773	25509	-0.114088	0.0212994	5595	Weighted-mean FA in tract superior longitudinal fasciculus (left)
774	943	-1.24193	0.00103934	215224	Frequency of stair climbing in last 4 weeks
775	25511	-0.0503638	0.309486	5595	Weighted-mean FA in tract superior thalamic radiation (left)
776	25512	-0.0563604	0.255404	5595	Weighted-mean FA in tract superior thalamic radiation (right)
777	25513	-0.00768648	0.876742	5595	Weighted-mean FA in tract uncinate fasciculus (left)
778	25514	-0.0681899	0.1688	5595	Weighted-mean FA in tract uncinate fasciculus (right)
779	25515	0.0624026	0.207935	5595	Weighted-mean MD in tract acoustic radiation (left)
780	25516	0.0651603	0.188536	5595	Weighted-mean MD in tract acoustic radiation (right)
781	25517	0.0538846	0.27688	5595	Weighted-mean MD in tract anterior thalamic radiation (left)
782	25518	0.052366	0.290645	5595	Weighted-mean MD in tract anterior thalamic radiation (right)
783	25519	0.03436	0.488097	5595	Weighted-mean MD in tract cingulate gyrus part of cingulum (left)
784	25520	0.0732424	0.139395	5595	Weighted-mean MD in tract cingulate gyrus part of cingulum (right)
785	25521	0.0555145	0.262608	5595	Weighted-mean MD in tract parahippocampal part of cingulum (left)
786	25522	0.130644	0.00836476	5595	Weighted-mean MD in tract parahippocampal part of cingulum (right)
787	25523	0.0439516	0.375134	5595	Weighted-mean MD in tract corticospinal tract (left)
788	25524	0.0374169	0.450232	5595	Weighted-mean MD in tract corticospinal tract (right)
789	25525	0.0354412	0.474511	5595	Weighted-mean MD in tract forceps major
790	25526	0.0927858	0.0611308	5595	Weighted-mean MD in tract forceps minor
791	25527	0.0816452	0.0994232	5595	Weighted-mean MD in tract inferior fronto-occipital fasciculus (left)
792	25528	0.0347431	0.483258	5595	Weighted-mean MD in tract inferior fronto-occipital fasciculus (right)
793	25529	0.102977	0.0376818	5595	Weighted-mean MD in tract inferior longitudinal fasciculus (left)
794	25530	0.0847761	0.0871073	5595	Weighted-mean MD in tract inferior longitudinal fasciculus (right)
795	25531	0.0387841	0.433852	5595	Weighted-mean MD in tract middle cerebellar peduncle
796	25532	0.0440901	0.373631	5595	Weighted-mean MD in tract medial lemniscus (left)
797	25533	0.047339	0.339447	5595	Weighted-mean MD in tract medial lemniscus (right)
798	25534	0.152561	0.00207202	5595	Weighted-mean MD in tract posterior thalamic radiation (left)
799	25535	0.147368	0.00293165	5595	Weighted-mean MD in tract posterior thalamic radiation (right)
800	25536	0.130925	0.00822546	5595	Weighted-mean MD in tract superior longitudinal fasciculus (left)
801	25537	0.104393	0.035127	5595	Weighted-mean MD in tract superior longitudinal fasciculus (right)
802	971	-0.456873	0.482557	159123	Frequency of walking for pleasure in last 4 weeks
803	25539	0.100289	0.0429681	5595	Weighted-mean MD in tract superior thalamic radiation (right)
804	25540	0.015535	0.753924	5595	Weighted-mean MD in tract uncinate fasciculus (left)
805	25541	0.0573821	0.246888	5595	Weighted-mean MD in tract uncinate fasciculus (right)
806	25542	0.0348509	0.481903	5595	Weighted-mean MO in tract acoustic radiation (left)
807	25543	0.0310048	0.531555	5595	Weighted-mean MO in tract acoustic radiation (right)
808	25544	0.00172539	0.972227	5595	Weighted-mean MO in tract anterior thalamic radiation (left)
809	25545	-0.03777	0.445969	5595	Weighted-mean MO in tract anterior thalamic radiation (right)
810	25546	-0.069437	0.161142	5595	Weighted-mean MO in tract cingulate gyrus part of cingulum (left)
811	25547	-0.0245634	0.620141	5595	Weighted-mean MO in tract cingulate gyrus part of cingulum (right)
812	981	1.00673	0.0993324	159123	Duration walking for pleasure
813	25549	-0.09951	0.0446115	5595	Weighted-mean MO in tract parahippocampal part of cingulum (right)
814	25550	-0.0395952	0.4243	5595	Weighted-mean MO in tract corticospinal tract (left)
815	25551	0.000397695	0.993597	5595	Weighted-mean MO in tract corticospinal tract (right)
816	25552	0.0313104	0.527517	5595	Weighted-mean MO in tract forceps major
817	25553	0.0362751	0.464178	5595	Weighted-mean MO in tract forceps minor
818	25554	-0.0365477	0.460827	5595	Weighted-mean MO in tract inferior fronto-occipital fasciculus (left)
819	25555	-0.0918739	0.063719	5595	Weighted-mean MO in tract inferior fronto-occipital fasciculus (right)
820	25556	-0.00569347	0.908537	5595	Weighted-mean MO in tract inferior longitudinal fasciculus (left)
821	25557	-0.091206	0.065672	5595	Weighted-mean MO in tract inferior longitudinal fasciculus (right)
822	991	-0.990852	0.240791	15042	Frequency of strenuous sports in last 4 weeks
823	25559	-0.242437	9.72152e-07	5595	Weighted-mean MO in tract medial lemniscus (left)
824	25560	-0.136045	0.00603136	5595	Weighted-mean MO in tract medial lemniscus (right)
825	25561	0.0306422	0.536367	5595	Weighted-mean MO in tract posterior thalamic radiation (left)
826	25562	-0.0590644	0.233303	5595	Weighted-mean MO in tract posterior thalamic radiation (right)
827	25563	0.0265454	0.592203	5595	Weighted-mean MO in tract superior longitudinal fasciculus (left)
828	25564	0.00757578	0.878504	5595	Weighted-mean MO in tract superior longitudinal fasciculus (right)
829	25565	0.0293543	0.553631	5595	Weighted-mean MO in tract superior thalamic radiation (left)
830	25566	-0.00823362	0.868047	5595	Weighted-mean MO in tract superior thalamic radiation (right)
831	25567	0.0772515	0.119004	5595	Weighted-mean MO in tract uncinate fasciculus (left)
832	1001	-0.377453	0.648163	15042	Duration of strenuous sports
833	25569	0.0413452	0.404112	5595	Weighted-mean L1 in tract acoustic radiation (left)
834	25570	0.0499769	0.313218	5595	Weighted-mean L1 in tract acoustic radiation (right)
835	25571	0.0274981	0.578982	5595	Weighted-mean L1 in tract anterior thalamic radiation (left)
836	25572	0.035711	0.471154	5595	Weighted-mean L1 in tract anterior thalamic radiation (right)
837	25573	0.00412844	0.933609	5595	Weighted-mean L1 in tract cingulate gyrus part of cingulum (left)
838	25574	0.0239909	0.628316	5595	Weighted-mean L1 in tract cingulate gyrus part of cingulum (right)
839	25575	0.0583922	0.238667	5595	Weighted-mean L1 in tract parahippocampal part of cingulum (left)
840	25576	0.0991547	0.0453788	5595	Weighted-mean L1 in tract parahippocampal part of cingulum (right)
841	25577	0.0362889	0.464007	5595	Weighted-mean L1 in tract corticospinal tract (left)
842	1011	-1.14802	6.82268e-13	114709	Frequency of light DIY in last 4 weeks
843	25579	0.0589032	0.234582	5595	Weighted-mean L1 in tract forceps major
844	25580	0.0832851	0.0928094	5595	Weighted-mean L1 in tract forceps minor
845	25581	0.0232303	0.639247	5595	Weighted-mean L1 in tract inferior fronto-occipital fasciculus (left)
846	25582	-0.0233772	0.63713	5595	Weighted-mean L1 in tract inferior fronto-occipital fasciculus (right)
847	25583	0.056351	0.255483	5595	Weighted-mean L1 in tract inferior longitudinal fasciculus (left)
848	25584	0.0255044	0.606804	5595	Weighted-mean L1 in tract inferior longitudinal fasciculus (right)
849	25585	0.0520307	0.293746	5595	Weighted-mean L1 in tract middle cerebellar peduncle
850	25586	-0.0509954	0.303457	5595	Weighted-mean L1 in tract medial lemniscus (left)
851	25587	-0.0218459	0.659346	5595	Weighted-mean L1 in tract medial lemniscus (right)
852	1021	-1.02769	1.54729e-11	114709	Duration of light DIY
853	25589	0.0920087	0.0633309	5595	Weighted-mean L1 in tract posterior thalamic radiation (right)
854	25590	0.0937948	0.0583686	5595	Weighted-mean L1 in tract superior longitudinal fasciculus (left)
855	25591	0.0788788	0.111426	5595	Weighted-mean L1 in tract superior longitudinal fasciculus (right)
856	25592	0.113067	0.022488	5595	Weighted-mean L1 in tract superior thalamic radiation (left)
857	25593	0.0785275	0.113029	5595	Weighted-mean L1 in tract superior thalamic radiation (right)
858	25594	0.022754	0.646134	5595	Weighted-mean L1 in tract uncinate fasciculus (left)
859	25595	0.0353421	0.475748	5595	Weighted-mean L1 in tract uncinate fasciculus (right)
860	25596	0.0579685	0.242092	5595	Weighted-mean L2 in tract acoustic radiation (left)
861	25597	0.0611799	0.216984	5595	Weighted-mean L2 in tract acoustic radiation (right)
862	1031	-1.03512	4.74592e-07	215934	Frequency of friend/family visits
863	25599	0.057672	0.244509	5595	Weighted-mean L2 in tract anterior thalamic radiation (right)
864	25600	0.055585	0.262002	5595	Weighted-mean L2 in tract cingulate gyrus part of cingulum (left)
865	25601	0.0645712	0.192564	5595	Weighted-mean L2 in tract cingulate gyrus part of cingulum (right)
866	25602	0.0594701	0.230108	5595	Weighted-mean L2 in tract parahippocampal part of cingulum (left)
867	25603	0.145167	0.0033859	5595	Weighted-mean L2 in tract parahippocampal part of cingulum (right)
868	25604	0.0411499	0.406336	5595	Weighted-mean L2 in tract corticospinal tract (left)
869	25605	0.0311318	0.529876	5595	Weighted-mean L2 in tract corticospinal tract (right)
870	25606	0.0161208	0.744961	5595	Weighted-mean L2 in tract forceps major
871	25607	0.0812052	0.10126	5595	Weighted-mean L2 in tract forceps minor
872	42001	-0.655259	0.000205485	3939	Source of myocardial infarction report
873	25609	0.070479	0.154947	5595	Weighted-mean L2 in tract inferior fronto-occipital fasciculus (right)
874	42003	0	1	884	Source of STEMI report
875	25611	0.11802	0.0172172	5595	Weighted-mean L2 in tract inferior longitudinal fasciculus (right)
876	42005	-0.00881074	0.983857	1500	Source of NSTEMI report
877	25613	0.116826	0.0183766	5595	Weighted-mean L2 in tract medial lemniscus (left)
878	42007	-0.578038	4.62119e-05	4329	Source of stroke report
879	25615	0.160981	0.00115469	5595	Weighted-mean L2 in tract posterior thalamic radiation (left)
880	42009	-0.293408	0.931307	1748	Source of ischaemic stroke report
881	1050	0.200713	7.7963e-125	201883	Time spend outdoors in summer
882	42011	-0.858796	0.190553	448	Source of intracerebral haemorrhage report
883	25619	0.115912	0.0193106	5595	Weighted-mean L2 in tract superior thalamic radiation (left)
884	42013	-0.384557	0.357431	703	Source of subarachnoid haemorrhage report
885	25621	0.00525712	0.915519	5595	Weighted-mean L2 in tract uncinate fasciculus (left)
886	42015	0	1	0	0
887	25623	0.0793085	0.10949	5595	Weighted-mean L3 in tract acoustic radiation (left)
888	42017	0	1	0	0
889	25625	0.0733034	0.139066	5595	Weighted-mean L3 in tract anterior thalamic radiation (left)
890	42019	0	1	0	0
891	1060	0.229591	5.4353e-163	202119	Time spent outdoors in winter
892	42021	0	1	0	0
893	25629	0.0419476	0.397298	5595	Weighted-mean L3 in tract parahippocampal part of cingulum (left)
894	42023	0	1	0	0
895	25631	0.032807	0.50797	5595	Weighted-mean L3 in tract corticospinal tract (left)
896	42025	0	1	0	0
897	25633	0.018667	0.70642	5595	Weighted-mean L3 in tract forceps major
898	42027	0	1	0	0
899	25635	0.108935	0.0279067	5595	Weighted-mean L3 in tract inferior fronto-occipital fasciculus (left)
900	42029	0	1	0	0
901	1070	0.266309	1.68599e-230	214022	Time spent watching television (TV)
902	42031	0	1	0	0
903	25639	0.00590272	0.905191	5595	Weighted-mean L3 in tract middle cerebellar peduncle
904	42033	0	1	0	0
905	25641	0.0720686	0.145848	5595	Weighted-mean L3 in tract medial lemniscus (right)
906	42035	0	1	0	0
907	25643	0.149943	0.00247133	5595	Weighted-mean L3 in tract posterior thalamic radiation (right)
908	42037	0	1	0	0
909	25645	0.113638	0.0218163	5595	Weighted-mean L3 in tract superior longitudinal fasciculus (right)
910	25646	0.126912	0.0104189	5595	Weighted-mean L3 in tract superior thalamic radiation (left)
911	1080	-0.150542	7.24177e-75	214360	Time spent using computer
912	25648	0.0157261	0.750996	5595	Weighted-mean L3 in tract uncinate fasciculus (left)
913	25649	0.0684226	0.167351	5595	Weighted-mean L3 in tract uncinate fasciculus (right)
914	25650	-0.0373936	0.450515	5595	Weighted-mean ICVF in tract acoustic radiation (left)
915	25651	-0.0276676	0.576645	5595	Weighted-mean ICVF in tract acoustic radiation (right)
916	25652	-0.0377706	0.445961	5595	Weighted-mean ICVF in tract anterior thalamic radiation (left)
917	25653	0.00461386	0.925824	5595	Weighted-mean ICVF in tract anterior thalamic radiation (right)
918	25654	-0.0266796	0.590332	5595	Weighted-mean ICVF in tract cingulate gyrus part of cingulum (left)
919	25655	-0.0446014	0.368114	5595	Weighted-mean ICVF in tract cingulate gyrus part of cingulum (right)
920	25656	-0.0150827	0.760866	5595	Weighted-mean ICVF in tract parahippocampal part of cingulum (left)
921	1090	-0.160371	4.11405e-84	212611	Time spent driving
922	25658	0.00497264	0.920075	5595	Weighted-mean ICVF in tract corticospinal tract (left)
923	25659	-0.0272742	0.582077	5595	Weighted-mean ICVF in tract corticospinal tract (right)
924	25660	0.00378958	0.939047	5595	Weighted-mean ICVF in tract forceps major
925	25661	-0.0109626	0.824931	5595	Weighted-mean ICVF in tract forceps minor
926	25662	-0.0495506	0.317364	5595	Weighted-mean ICVF in tract inferior fronto-occipital fasciculus (left)
927	25663	-0.0100676	0.83902	5595	Weighted-mean ICVF in tract inferior fronto-occipital fasciculus (right)
928	25664	-0.0422142	0.394305	5595	Weighted-mean ICVF in tract inferior longitudinal fasciculus (left)
929	25665	-0.0162997	0.742231	5595	Weighted-mean ICVF in tract inferior longitudinal fasciculus (right)
930	25666	0.0621829	0.20954	5595	Weighted-mean ICVF in tract middle cerebellar peduncle
931	1100	-2.49304	0	215934	Drive faster than motorway speed limit
932	25668	0.0071335	0.885546	5595	Weighted-mean ICVF in tract medial lemniscus (right)
933	25669	-0.0258992	0.601247	5595	Weighted-mean ICVF in tract posterior thalamic radiation (left)
934	25670	0.0148209	0.764893	5595	Weighted-mean ICVF in tract posterior thalamic radiation (right)
935	25671	-0.0757565	0.126315	5595	Weighted-mean ICVF in tract superior longitudinal fasciculus (left)
936	25672	-0.0524062	0.290275	5595	Weighted-mean ICVF in tract superior longitudinal fasciculus (right)
937	25673	-0.0660194	0.182774	5595	Weighted-mean ICVF in tract superior thalamic radiation (left)
938	25674	-0.0538451	0.277232	5595	Weighted-mean ICVF in tract superior thalamic radiation (right)
939	25675	-0.0299624	0.545446	5595	Weighted-mean ICVF in tract uncinate fasciculus (left)
940	25676	-0.0527442	0.287175	5595	Weighted-mean ICVF in tract uncinate fasciculus (right)
941	1110	-1.86121	1.07153e-24	215934	Length of mobile phone use
942	25678	-0.000687453	0.988932	5595	Weighted-mean OD in tract acoustic radiation (right)
943	25679	0.0766362	0.121972	5595	Weighted-mean OD in tract anterior thalamic radiation (left)
944	25680	0.0484714	0.32802	5595	Weighted-mean OD in tract anterior thalamic radiation (right)
945	25681	0.00606835	0.902544	5595	Weighted-mean OD in tract cingulate gyrus part of cingulum (left)
946	25682	0.0614279	0.215126	5595	Weighted-mean OD in tract cingulate gyrus part of cingulum (right)
947	25683	-0.0149336	0.763159	5595	Weighted-mean OD in tract parahippocampal part of cingulum (left)
948	25684	0.0717049	0.147893	5595	Weighted-mean OD in tract parahippocampal part of cingulum (right)
949	25685	-0.030075	0.543937	5595	Weighted-mean OD in tract corticospinal tract (left)
950	25686	-0.045729	0.356128	5595	Weighted-mean OD in tract corticospinal tract (right)
951	1120	-1.3052	0.000765035	184022	Weekly usage of mobile phone in last 3 months
952	25688	0.0395055	0.42535	5595	Weighted-mean OD in tract forceps minor
953	25689	0.0777003	0.116875	5595	Weighted-mean OD in tract inferior fronto-occipital fasciculus (left)
954	25690	0.133051	0.0072401	5595	Weighted-mean OD in tract inferior fronto-occipital fasciculus (right)
955	25691	0.0608351	0.219586	5595	Weighted-mean OD in tract inferior longitudinal fasciculus (left)
956	25692	0.126007	0.0109799	5595	Weighted-mean OD in tract inferior longitudinal fasciculus (right)
957	25693	-0.0462766	0.350398	5595	Weighted-mean OD in tract middle cerebellar peduncle
958	25694	0.166255	0.000789569	5595	Weighted-mean OD in tract medial lemniscus (left)
959	25695	0.12702	0.0103532	5595	Weighted-mean OD in tract medial lemniscus (right)
960	25696	0.0198121	0.689321	5595	Weighted-mean OD in tract posterior thalamic radiation (left)
961	1130	-1.5587	1.41708e-19	184022	Hands-free device/speakerphone use with mobile phone in last 3 month
962	25698	0.0577732	0.243682	5595	Weighted-mean OD in tract superior longitudinal fasciculus (left)
963	25699	0.0280387	0.571543	5595	Weighted-mean OD in tract superior longitudinal fasciculus (right)
964	25700	-0.020604	0.677589	5595	Weighted-mean OD in tract superior thalamic radiation (left)
965	25701	0.010212	0.836743	5595	Weighted-mean OD in tract superior thalamic radiation (right)
966	25702	-0.0597046	0.228276	5595	Weighted-mean OD in tract uncinate fasciculus (left)
967	25703	-0.00645043	0.896441	5595	Weighted-mean OD in tract uncinate fasciculus (right)
968	25704	0.0584285	0.238375	5595	Weighted-mean ISOVF in tract acoustic radiation (left)
969	25705	0.0626363	0.206236	5595	Weighted-mean ISOVF in tract acoustic radiation (right)
970	25706	0.048192	0.330816	5595	Weighted-mean ISOVF in tract anterior thalamic radiation (left)
971	1140	-0.781836	0.0959922	184022	Difference in mobile phone use compared to two years previously
972	25708	-0.0151986	0.759085	5595	Weighted-mean ISOVF in tract cingulate gyrus part of cingulum (left)
973	25709	0.0297907	0.547751	5595	Weighted-mean ISOVF in tract cingulate gyrus part of cingulum (right)
974	25710	0.0477771	0.334997	5595	Weighted-mean ISOVF in tract parahippocampal part of cingulum (left)
975	25711	0.114695	0.0206187	5595	Weighted-mean ISOVF in tract parahippocampal part of cingulum (right)
976	25712	0.0820487	0.097762	5595	Weighted-mean ISOVF in tract corticospinal tract (left)
977	25713	0.050798	0.305333	5595	Weighted-mean ISOVF in tract corticospinal tract (right)
978	25714	0.026972	0.586266	5595	Weighted-mean ISOVF in tract forceps major
979	25715	0.100589	0.0423489	5595	Weighted-mean ISOVF in tract forceps minor
980	25716	0.0848009	0.0870151	5595	Weighted-mean ISOVF in tract inferior fronto-occipital fasciculus (left)
981	1150	-0.992031	0.000448728	184022	Usual side of head for mobile phone use
982	25718	0.123283	0.0128347	5595	Weighted-mean ISOVF in tract inferior longitudinal fasciculus (left)
983	25719	0.118542	0.0167302	5595	Weighted-mean ISOVF in tract inferior longitudinal fasciculus (right)
984	25720	0.0563147	0.25579	5595	Weighted-mean ISOVF in tract middle cerebellar peduncle
985	25721	0.101049	0.0414134	5595	Weighted-mean ISOVF in tract medial lemniscus (left)
986	25722	0.073577	0.137596	5595	Weighted-mean ISOVF in tract medial lemniscus (right)
987	25723	0.170922	0.000559046	5595	Weighted-mean ISOVF in tract posterior thalamic radiation (left)
988	25724	0.203853	3.84635e-05	5595	Weighted-mean ISOVF in tract posterior thalamic radiation (right)
989	25725	0.114533	0.0207979	5595	Weighted-mean ISOVF in tract superior longitudinal fasciculus (left)
990	25726	0.103869	0.0360542	5595	Weighted-mean ISOVF in tract superior longitudinal fasciculus (right)
991	1160	-0.0434678	1.23895e-07	214528	Sleep duration
992	25728	0.0919486	0.0635037	5595	Weighted-mean ISOVF in tract superior thalamic radiation (right)
993	25729	-0.0100248	0.839696	5595	Weighted-mean ISOVF in tract uncinate fasciculus (left)
994	25730	0.0202815	0.682358	5595	Weighted-mean ISOVF in tract uncinate fasciculus (right)
995	25731	0.0761908	0.103527	6266	Discrepancy between T1 brain image and standard-space brain template (linearly-aligned)
996	25732	0.0377287	0.420187	6266	Discrepancy between T1 brain image and standard-space brain template (nonlinearly-aligned)
997	25733	0.0735648	0.115981	6266	Amount of warping applied to non-linearly align T1 brain image to standard-space
998	25734	0.144354	0.00203352	6266	Inverted signal-to-noise ratio in T1
999	25735	0.105877	0.0236653	6266	Inverted contrast-to-noise ratio in T1
1000	25736	0.0875802	0.0716544	5796	Discrepancy between T2 FLAIR brain image and T1 brain image
1001	25746	0.0475399	0.231962	8509	Number of dMRI outlier slices detected and corrected
1002	1170	-2.04092	1.76593e-05	215934	Getting up in morning
1003	25739	0.07691	0.112642	5821	Discrepancy between rfMRI brain image and T1 brain image
1004	25740	0.0706653	0.156549	5516	Discrepancy between tfMRI brain image and T1 brain image
1005	25741	0.312679	1.0433e-10	5821	Mean rfMRI head motion, averaged across space and time points
1006	25742	0.200883	5.57477e-05	5516	Mean tfMRI head motion, averaged across space and time points
1007	25743	0.19965	3.77618e-05	5821	Inverted temporal signal-to-noise ratio in pre-processed rfMRI
1008	25744	-0.0738689	0.127586	5821	Inverted temporal signal-to-noise ratio in artefact-cleaned pre-processed rfMRI
1009	25745	0.0873484	0.0798876	5516	Inverted temporal signal-to-noise ratio in pre-processed tfMRI
1010	25747	0	1	0	0
1011	1180	-1.34638	2.58716e-11	215934	Morning/evening person (chronotype)
1012	25749	0	1	0	0
1013	25756	-0.0287433	0.440826	9611	Scanner lateral (X) brain position
1014	25758	0.00511682	0.890862	9611	Scanner longitudinal (Z) brain position
1015	25759	-0.0114102	0.759012	9652	Scanner table position
1016	25761	0.0475562	0.340601	5513	90th percentile of BOLD effect (in group-defined mask) for shapes activation
1017	25762	-0.0241494	0.628446	5513	90th percentile of z-statistic (in group-defined mask) for shapes activation
1018	25763	-0.0321698	0.519162	5513	90th percentile of BOLD effect (in group-defined mask) for faces activation
1019	25764	-0.082948	0.0964452	5513	90th percentile of z-statistic (in group-defined mask) for faces activation
1020	25765	-0.11726	0.0187601	5513	90th percentile of BOLD effect (in group-defined mask) for faces-shapes contrast
1021	1190	-1.50224	0.0010288	215934	Nap during day
1022	25766	-0.14653	0.00331026	5513	90th percentile of z-statistic (in group-defined mask) for faces-shapes contrast
1023	25767	-0.0537309	0.281602	5513	90th percentile of BOLD effect (in group-defined amygdala activation mask) for faces-shapes contrast
1024	25768	-0.128768	0.00985	5513	90th percentile of z-statistic (in group-defined amygdala activation mask) for faces-shapes contrast
1025	1200	-0.668278	0.0965369	215934	Sleeplessness / insomnia
1026	25780	0.427111	0.121901	1988	Acquisition protocol phase.
1027	25781	0.069808	0.151153	5795	Total volume of white matter hyperintensities (from T1 and T2_FLAIR images)
1028	25782	-0.110619	0.0181003	6265	Volume of grey matter in Frontal Pole (left)
1029	25783	-0.0890983	0.0569651	6265	Volume of grey matter in Frontal Pole (right)
1030	25784	-0.143862	0.00210991	6265	Volume of grey matter in Insular Cortex (left)
1031	25785	-0.132746	0.00455947	6265	Volume of grey matter in Insular Cortex (right)
1032	1210	0	1	506216	Snoring
1033	25786	-0.142262	0.00236509	6265	Volume of grey matter in Superior Frontal Gyrus (left)
1034	25787	-0.0715663	0.126282	6265	Volume of grey matter in Superior Frontal Gyrus (right)
1035	25788	-0.0254559	0.586585	6265	Volume of grey matter in Middle Frontal Gyrus (left)
1036	25789	-0.0191419	0.682607	6265	Volume of grey matter in Middle Frontal Gyrus (right)
1037	25790	-0.0895901	0.055609	6265	Volume of grey matter in Inferior Frontal Gyrus, pars triangularis (left)
1038	25791	-0.0780771	0.095305	6265	Volume of grey matter in Inferior Frontal Gyrus, pars triangularis (right)
1039	25792	-0.0592326	0.205729	6265	Volume of grey matter in Inferior Frontal Gyrus, pars opercularis (left)
1040	25793	-0.0974985	0.0372414	6265	Volume of grey matter in Inferior Frontal Gyrus, pars opercularis (right)
1041	25794	-0.10212	0.0291185	6265	Volume of grey matter in Precentral Gyrus (left)
1042	1220	-1.75652	1.33162e-07	215934	Daytime dozing / sleeping (narcolepsy)
1043	25795	-0.0996	0.0333352	6265	Volume of grey matter in Precentral Gyrus (right)
1044	25796	-0.110405	0.0183254	6265	Volume of grey matter in Temporal Pole (left)
1045	25797	-0.0982173	0.0358636	6265	Volume of grey matter in Temporal Pole (right)
1046	25798	-0.0763418	0.102896	6265	Volume of grey matter in Superior Temporal Gyrus, anterior division (left)
1047	25799	-0.11446	0.0144591	6265	Volume of grey matter in Superior Temporal Gyrus, anterior division (right)
1048	25800	-0.0622485	0.183572	6265	Volume of grey matter in Superior Temporal Gyrus, posterior division (left)
1049	25801	-0.109156	0.0196858	6265	Volume of grey matter in Superior Temporal Gyrus, posterior division (right)
1050	25802	-0.0754359	0.107046	6265	Volume of grey matter in Middle Temporal Gyrus, anterior division (left)
1051	25803	-0.159327	0.000661423	6265	Volume of grey matter in Middle Temporal Gyrus, anterior division (right)
1052	25804	-0.0707998	0.130393	6265	Volume of grey matter in Middle Temporal Gyrus, posterior division (left)
1053	25805	-0.133439	0.00435244	6265	Volume of grey matter in Middle Temporal Gyrus, posterior division (right)
1054	25806	-0.0350128	0.454488	6265	Volume of grey matter in Middle Temporal Gyrus, temporooccipital part (left)
1055	25807	-0.0985302	0.0352777	6265	Volume of grey matter in Middle Temporal Gyrus, temporooccipital part (right)
1056	25808	-0.101101	0.0307639	6265	Volume of grey matter in Inferior Temporal Gyrus, anterior division (left)
1057	25809	-0.085971	0.0662474	6265	Volume of grey matter in Inferior Temporal Gyrus, anterior division (right)
1058	25810	-0.07975	0.0884179	6265	Volume of grey matter in Inferior Temporal Gyrus, posterior division (left)
1059	25811	-0.0902182	0.053916	6265	Volume of grey matter in Inferior Temporal Gyrus, posterior division (right)
1060	25812	-0.0867594	0.0637972	6265	Volume of grey matter in Inferior Temporal Gyrus, temporooccipital part (left)
1061	1239	-1.62365	3.346e-06	215934	Current tobacco smoking
1062	25813	-0.0756921	0.105859	6265	Volume of grey matter in Inferior Temporal Gyrus, temporooccipital part (right)
1063	25814	-0.18434	8.13841e-05	6265	Volume of grey matter in Postcentral Gyrus (left)
1064	25815	-0.162404	0.000518707	6265	Volume of grey matter in Postcentral Gyrus (right)
1065	25816	-0.0695917	0.137084	6265	Volume of grey matter in Superior Parietal Lobule (left)
1066	25817	-0.0908955	0.0521388	6265	Volume of grey matter in Superior Parietal Lobule (right)
1067	25818	-0.0875719	0.0613511	6265	Volume of grey matter in Supramarginal Gyrus, anterior division (left)
1068	25819	-0.147613	0.00160759	6265	Volume of grey matter in Supramarginal Gyrus, anterior division (right)
1069	25820	-0.0254367	0.586868	6265	Volume of grey matter in Supramarginal Gyrus, posterior division (left)
1070	25821	-0.148269	0.00153198	6265	Volume of grey matter in Supramarginal Gyrus, posterior division (right)
1071	1249	-0.969727	6.92614e-12	201328	Past tobacco smoking
1072	25822	-0.0295334	0.528108	6265	Volume of grey matter in Angular Gyrus (left)
1073	25823	-0.0504207	0.281423	6265	Volume of grey matter in Angular Gyrus (right)
1074	25824	-0.140959	0.00259329	6265	Volume of grey matter in Lateral Occipital Cortex, superior division (left)
1075	25825	-0.0453637	0.332502	6265	Volume of grey matter in Lateral Occipital Cortex, superior division (right)
1076	25826	-0.0415223	0.375068	6265	Volume of grey matter in Lateral Occipital Cortex, inferior division (left)
1077	25827	-0.0282481	0.546217	6265	Volume of grey matter in Lateral Occipital Cortex, inferior division (right)
1078	25828	-0.0814776	0.0817323	6265	Volume of grey matter in Intracalcarine Cortex (left)
1079	25829	-0.0660178	0.15843	6265	Volume of grey matter in Intracalcarine Cortex (right)
1080	25830	-0.0418104	0.371764	6265	Volume of grey matter in Frontal Medial Cortex (left)
1081	1259	-0.851591	6.85199e-05	201328	Smoking/smokers in household
1082	25831	-0.0387966	0.407224	6265	Volume of grey matter in Frontal Medial Cortex (right)
1083	25832	-0.0891309	0.0568743	6265	Volume of grey matter in Juxtapositional Lobule Cortex (formerly Supplementary Motor Cortex) (left)
1084	25833	-0.151115	0.00124036	6265	Volume of grey matter in Juxtapositional Lobule Cortex (formerly Supplementary Motor Cortex) (right)
1085	25834	-0.175415	0.000177342	6265	Volume of grey matter in Subcallosal Cortex (left)
1086	25835	-0.189554	5.08102e-05	6265	Volume of grey matter in Subcallosal Cortex (right)
1087	25836	-0.0932991	0.0462225	6265	Volume of grey matter in Paracingulate Gyrus (left)
1088	25837	-0.0781074	0.0951764	6265	Volume of grey matter in Paracingulate Gyrus (right)
1089	25838	0.0829476	0.0763724	6265	Volume of grey matter in Cingulate Gyrus, anterior division (left)
1090	25839	-0.0207596	0.657428	6265	Volume of grey matter in Cingulate Gyrus, anterior division (right)
1091	1269	0.026909	0.00150484	196702	Exposure to tobacco smoke at home
1092	25840	-0.124731	0.00769356	6265	Volume of grey matter in Cingulate Gyrus, posterior division (left)
1093	25841	-0.121382	0.00949648	6265	Volume of grey matter in Cingulate Gyrus, posterior division (right)
1094	25842	-0.119848	0.010442	6265	Volume of grey matter in Precuneous Cortex (left)
1095	25843	-0.128222	0.00614631	6265	Volume of grey matter in Precuneous Cortex (right)
1096	25844	-0.0397776	0.395466	6265	Volume of grey matter in Cuneal Cortex (left)
1097	25845	-0.0993785	0.0337297	6265	Volume of grey matter in Cuneal Cortex (right)
1098	25846	-0.190134	4.81787e-05	6265	Volume of grey matter in Frontal Orbital Cortex (left)
1099	25847	-0.15159	0.001197	6265	Volume of grey matter in Frontal Orbital Cortex (right)
1100	25848	-0.180058	0.000118777	6265	Volume of grey matter in Parahippocampal Gyrus, anterior division (left)
1101	1279	0.0769265	1.6112e-18	182975	Exposure to tobacco smoke outside home
1102	25849	-0.142636	0.00230294	6265	Volume of grey matter in Parahippocampal Gyrus, anterior division (right)
1103	25850	-0.127481	0.00644915	6265	Volume of grey matter in Parahippocampal Gyrus, posterior division (left)
1104	25851	-0.117574	0.0119974	6265	Volume of grey matter in Parahippocampal Gyrus, posterior division (right)
1105	25852	-0.172821	0.000220945	6265	Volume of grey matter in Lingual Gyrus (left)
1106	25853	-0.177265	0.000151326	6265	Volume of grey matter in Lingual Gyrus (right)
1107	25854	-0.20742	9.23539e-06	6265	Volume of grey matter in Temporal Fusiform Cortex, anterior division (left)
1108	51	-0.568629	0	215600	Seated height
1109	25855	-0.0759895	0.104494	6265	Volume of grey matter in Temporal Fusiform Cortex, anterior division (right)
1110	25856	-0.094616	0.0432279	6265	Volume of grey matter in Temporal Fusiform Cortex, posterior division (left)
1111	1289	-0.0181824	0.02703	214341	Cooked vegetable intake
1112	25857	-0.12194	0.00917203	6265	Volume of grey matter in Temporal Fusiform Cortex, posterior division (right)
1113	25858	-0.0139598	0.765545	6265	Volume of grey matter in Temporal Occipital Fusiform Cortex (left)
1114	25859	-0.0866512	0.064129	6265	Volume of grey matter in Temporal Occipital Fusiform Cortex (right)
1115	25860	-0.102547	0.0284504	6265	Volume of grey matter in Occipital Fusiform Gyrus (left)
1116	25861	-0.0915314	0.0505152	6265	Volume of grey matter in Occipital Fusiform Gyrus (right)
1117	25862	-0.114852	0.014126	6265	Volume of grey matter in Frontal Operculum Cortex (left)
1118	25863	-0.133002	0.00448188	6265	Volume of grey matter in Frontal Operculum Cortex (right)
1119	25864	-0.0610259	0.192331	6265	Volume of grey matter in Central Opercular Cortex (left)
1120	25865	-0.131721	0.00488254	6265	Volume of grey matter in Central Opercular Cortex (right)
1121	1299	-0.0331028	5.78873e-05	213991	Salad / raw vegetable intake
1122	25867	-0.0288009	0.53839	6265	Volume of grey matter in Parietal Operculum Cortex (right)
1123	25868	-0.0802292	0.0865208	6265	Volume of grey matter in Planum Polare (left)
1124	25869	-0.118953	0.0110315	6265	Volume of grey matter in Planum Polare (right)
1125	25870	-0.091136	0.0515196	6265	Volume of grey matter in Heschl's Gyrus (includes H1 and H2) (left)
1126	25871	-0.130431	0.00531806	6265	Volume of grey matter in Heschl's Gyrus (includes H1 and H2) (right)
1127	25872	-0.0686663	0.142386	6265	Volume of grey matter in Planum Temporale (left)
1128	25873	-0.088838	0.057694	6265	Volume of grey matter in Planum Temporale (right)
1129	25874	-0.0322455	0.490927	6265	Volume of grey matter in Supracalcarine Cortex (left)
1130	25875	-0.0362656	0.438506	6265	Volume of grey matter in Supracalcarine Cortex (right)
1131	1309	-0.0733676	4.06703e-19	215367	Fresh fruit intake
1132	25877	-0.122887	0.00864419	6265	Volume of grey matter in Occipital Pole (right)
1133	25878	-0.231671	7.27889e-07	6265	Volume of grey matter in Thalamus (left)
1134	25879	-0.202467	1.5027e-05	6265	Volume of grey matter in Thalamus (right)
1135	25880	-0.0965783	0.0390708	6265	Volume of grey matter in Caudate (left)
1136	25881	-0.115543	0.0135562	6265	Volume of grey matter in Caudate (right)
1137	25882	-0.0679485	0.146606	6265	Volume of grey matter in Putamen (left)
1138	25883	-0.126654	0.00680272	6265	Volume of grey matter in Putamen (right)
1139	25884	0.0299219	0.522695	6265	Volume of grey matter in Pallidum (left)
1140	25885	0.00414003	0.929528	6265	Volume of grey matter in Pallidum (right)
1141	1319	-0.10385	1.85396e-36	213976	Dried fruit intake
1142	25887	-0.189138	5.2776e-05	6265	Volume of grey matter in Hippocampus (right)
1143	25888	-0.194602	3.18358e-05	6265	Volume of grey matter in Amygdala (left)
1144	25889	-0.20735	9.29955e-06	6265	Volume of grey matter in Amygdala (right)
1145	25890	-0.194145	3.32255e-05	6265	Volume of grey matter in Ventral Striatum (left)
1146	25891	-0.201052	1.72337e-05	6265	Volume of grey matter in Ventral Striatum (right)
1147	25892	-0.0635056	0.174878	6265	Volume of grey matter in Brain-Stem
1148	25893	-0.172229	0.000232213	6265	Volume of grey matter in I-IV Cerebellum (left)
1149	25894	-0.130893	0.0051582	6265	Volume of grey matter in I-IV Cerebellum (right)
1150	25895	-0.17444	0.000192678	6265	Volume of grey matter in V Cerebellum (left)
1151	1329	-1.55183	0.00246096	215934	Oily fish intake
1152	25897	-0.166128	0.000384385	6265	Volume of grey matter in VI Cerebellum (left)
1153	25898	-0.131847	0.00484162	6265	Volume of grey matter in Vermis VI Cerebellum
1154	25899	-0.181124	0.000108184	6265	Volume of grey matter in VI Cerebellum (right)
1155	25900	-0.107548	0.0215669	6265	Volume of grey matter in Crus I Cerebellum (left)
1156	25901	0.0264146	0.572569	6265	Volume of grey matter in Vermis Crus I Cerebellum
1157	25902	-0.134442	0.00406767	6265	Volume of grey matter in Crus I Cerebellum (right)
1158	25903	-0.149856	0.00136236	6265	Volume of grey matter in Crus II Cerebellum (left)
1159	25904	-0.125518	0.00731694	6265	Volume of grey matter in Vermis Crus II Cerebellum
1160	25905	-0.155966	0.000858522	6265	Volume of grey matter in Crus II Cerebellum (right)
1161	1339	0.714478	0.245322	215934	Non-oily fish intake
1162	25907	-0.112895	0.0158564	6265	Volume of grey matter in Vermis VIIb Cerebellum
1163	25908	-0.185815	7.13143e-05	6265	Volume of grey matter in VIIb Cerebellum (right)
1164	25909	-0.179717	0.00012236	6265	Volume of grey matter in VIIIa Cerebellum (left)
1165	25910	-0.147882	0.00157615	6265	Volume of grey matter in Vermis VIIIa Cerebellum
1166	25911	-0.231065	7.78121e-07	6265	Volume of grey matter in VIIIa Cerebellum (right)
1167	25912	-0.23157	7.36035e-07	6265	Volume of grey matter in VIIIb Cerebellum (left)
1168	25913	-0.172664	0.00022389	6265	Volume of grey matter in Vermis VIIIb Cerebellum
1169	25914	-0.200951	1.74026e-05	6265	Volume of grey matter in VIIIb Cerebellum (right)
1170	25915	-0.209096	7.81326e-06	6265	Volume of grey matter in IX Cerebellum (left)
1171	1349	-1.39997	0.0274964	215934	Processed meat intake
1172	25917	-0.200945	1.74126e-05	6265	Volume of grey matter in IX Cerebellum (right)
1173	25918	-0.211019	6.43997e-06	6265	Volume of grey matter in X Cerebellum (left)
1174	25919	-0.0497725	0.287655	6265	Volume of grey matter in Vermis X Cerebellum
1175	25920	-0.184217	8.22845e-05	6265	Volume of grey matter in X Cerebellum (right)
1176	1359	-1.28346	0.0804504	215934	Poultry intake
1177	1369	-1.16698	0.0448094	215934	Beef intake
1178	1379	-1.6627	0.00134828	215934	Lamb/mutton intake
1179	1389	-1.84359	0.000430766	215934	Pork intake
1180	1408	-1.05274	0.150828	211073	Cheese intake
1181	1418	-0.87214	0.306325	215934	Milk type used
1182	1428	-1.11809	0.0517087	215934	Spread type
1183	1438	0.120278	2.44537e-48	213742	Bread intake
1184	1448	0.645512	0.137138	206342	Bread type
1185	1458	-0.0539206	5.10836e-11	215525	Cereal intake
1186	1468	-0.658317	0.0349643	182097	Cereal type
1187	1478	1.01804	0.25768	215934	Salt added to food
1188	1488	0.0534724	7.32228e-11	215522	Tea intake
1189	1498	-0.00673009	0.412243	215628	Coffee intake
1190	1508	-1.48945	5.42477e-09	166800	Coffee type
1191	1518	-2.76321	8.14167e-08	215934	Hot drink temperature
1192	1528	0.00667605	0.416933	214633	Water intake
1193	1538	-1.01931	3.44041e-09	215934	Major dietary changes in the last 5 years
1194	1548	-1.38482	0.00341827	215934	Variation in diet
1195	1558	-1.02963	0.00168752	215934	Alcohol intake frequency.
1196	1568	-0.0631508	2.09103e-10	138957	Average weekly red wine intake
1197	1578	0.010951	0.27083	138824	Average weekly champagne plus white wine intake
1198	1588	0.15546	2.96832e-55	139104	Average weekly beer plus cider intake
1199	1598	0.113722	2.71371e-30	138662	Average weekly spirits intake
1200	1608	0.0465442	2.76832e-06	139186	Average weekly fortified wine intake
1201	1618	0	1	278907	Alcohol usually taken with meals
1202	1628	-2.1218	1.45447e-09	198494	Alcohol intake versus 10 years previously
1203	1647	-1.16792	0.358139	215934	Country of birth (UK/elsewhere)
1204	1677	0	1	407529	Breastfed as a baby
1205	1687	-2.37378	0.000796766	215934	Comparative body size at age 10
1206	1697	-0.340656	0.704588	215934	Comparative height size at age 10
1207	100001	-0.0181881	0.395782	30098	Food weight
1208	100002	0.0517098	0.0157626	30098	Energy
1209	100003	0.0721483	0.000754935	30098	Protein
1210	100004	0.0578974	0.0068654	30098	Fat
1211	100005	-0.00787514	0.713113	30098	Carbohydrate
1212	100006	0.0670882	0.00173325	30098	Saturated fat
1213	100007	0.0431919	0.0437339	30098	Polyunsaturated fat
1214	100008	-0.00926379	0.665369	30098	Total sugars
1215	100010	-0.602709	4.80213e-09	30086	Portion size
1216	1707	0.716049	0.28355	215934	Handedness (chirality/laterality)
1217	100009	-0.083499	9.66187e-05	30098	Englyst dietary fibre
1218	100011	-0.0207673	0.332245	30098	Iron
1219	100012	0.0614873	0.00409247	30098	Vitamin B6
1220	100013	0.000863473	0.967843	30098	Vitamin B12
1221	100014	-0.0192109	0.369754	30098	Folate
1222	100015	-0.0267889	0.211026	30098	Vitamin C
1223	100016	-0.019952	0.351577	30098	Potassium
1224	100017	-0.0536256	0.0122858	30098	Magnesium
1225	100020	0	1	458628	Typical diet yesterday
1226	1717	-2.25625	0.00118985	215934	Skin colour
1227	100018	0.0729764	0.000769019	29358	Retinol
1228	100019	-0.0227502	0.288154	30098	Carotene
1229	100021	-0.0128324	0.549088	30098	Vitamin D
1230	100022	0.106194	7.08336e-07	30098	Alcohol
1231	100026	0	1	3494	Daily dietary data credible
1232	100023	0.0119756	0.576077	30098	Starch
1233	100024	0.00821615	0.701275	30098	Calcium
1234	100025	-0.0669635	0.00176796	30098	Vitamin E
1235	1727	-1.36715	4.70583e-05	215934	Ease of skin tanning
1236	1737	-0.127028	1.97349e-41	164007	Childhood sunburn occasions
1237	1747	-0.799629	0.32557	215934	Hair colour (natural, before greying)
1238	1757	-1.75728	1.63898e-07	215934	Facial ageing
1239	1767	0	1	543814	Adopted as a child
1240	1777	0	1	524926	Part of a multiple birth
1241	1787	0	1	460767	Maternal smoking around birth
1242	1797	0	1	530654	Father still alive
1243	1807	-0.133091	1.95382e-43	158681	Father's age at death
1244	10004	0	1	0	Medication for pain relief, constipation, heartburn (pilot)
1245	10005	0	1	0	Medication for smoking cessation, constipation, heartburn, allergies (pilot)
1246	10006	0	1	0	Mouth/teeth dental problems (pilot)
1247	10007	0	1	0	Vitamin and mineral supplements (pilot)
1248	10016	0	1	2926	Regular use of hands-free device/speakerphone with mobile phone (pilot)
1249	26410	0.0295237	0.000859536	184296	Index of Multiple Deprivation (England)
1250	1835	0	1	536069	Mother still alive
1251	26411	0.0484247	4.58434e-08	184296	Income score (England)
1252	26412	0.0334988	0.000155798	184296	Employment score (England)
1253	26413	-0.0795854	2.58494e-19	184296	Health score (England)
1254	26414	0.141325	2.46056e-57	184296	Education score (England)
1255	26415	-0.038691	1.25501e-05	184296	Housing score (England)
1256	26416	-0.0142926	0.106647	184296	Crime score (England)
1257	26417	-0.0404923	4.85023e-06	184296	Living environment score (England)
1258	26418	0.326296	4.57745e-17	9830	Income score (Wales)
1259	26419	0.348416	3.00356e-19	9830	Employment score (Wales)
1260	1845	-0.146855	2.16301e-31	85804	Mother's age
1261	100150	-0.120777	0.134449	25969	Drinking water intake
1262	26420	0.257891	3.30643e-11	9830	Health score (Wales)
1263	26421	0.386104	2.69561e-23	9830	Education score (Wales)
1264	26422	-0.148167	0.000140325	9830	Access to services score (Wales)
1265	26423	0.205229	1.32222e-07	9830	Housing score (Wales)
1266	26424	0.051757	0.183645	9830	Physical environment score (Wales)
1267	26425	0.246057	2.49575e-10	9830	Community safety score (Wales)
1268	26426	0.352597	1.11968e-19	9830	Index of Multiple Deprivation (Wales)
1269	26427	0.682515	1.32268e-117	16690	Index of Multiple Deprivation (Scotland)
1270	26428	0.669426	3.82001e-113	16690	Income score (Scotland)
1271	100160	0.563862	0.0104188	4317	Low calorie drink intake
1272	26429	0.670948	1.16979e-113	16690	Employment score (Scotland)
1273	26430	0.664319	1.98524e-111	16690	Health score (Scotland)
1274	26431	0.691514	1.00294e-120	16690	Education score (Scotland)
1275	26432	0.517966	4.31672e-68	16690	Housing score (Scotland)
1276	26433	-0.109811	0.000232591	16690	Access to services score (Scotland)
1277	26434	0.270318	2.67925e-18	15562	Crime score (Scotland)
1278	10139	0	1	74340	Index for card A in round (pilot)
1279	10140	0	1	74340	Index for card B in round (pilot)
1280	100170	1.12692	0.128885	2170	Fizzy drink intake
1281	102950	-0.297174	0.548931	1273	Omelette intake
1282	1873	0.121398	6.10833e-49	212740	Number of full brothers
1283	100180	0.460114	0.254721	3595	Squash intake
1284	1883	0.113526	4.98709e-43	212771	Number of full sisters
1285	41080	0.240337	4.73874e-129	152247	Episodes containing "Operative procedures - secondary OPCS4" data
1286	5259	0	1	43046	Pressure curve (right)
1287	100190	-0.167175	0.0821538	7258	Orange juice intake
1288	41081	0	1	0	0
1289	100200	-0.420426	0.118075	832	Grapefruit juice intake
1290	100210	2.15346	0.141244	3768	Pure fruit/vegetable juice intake
1291	10105	0	1	3772	Internet user (pilot)
1292	100220	-0.871083	0.00327364	852	Fruit smoothie intake
1293	1920	0	1	543382	Mood swings
1294	10114	0	1	3720	Willing to be contacted by email (pilot)
1295	10115	0	1	0	Why stopped smoking (pilot)
1296	100230	2.88965	0.0114958	1256	Dairy smoothie intake
1297	1930	0	1	535375	Miserableness
1298	41090	0.279597	5.97856e-175	151413	Episodes containing "End of spell indicator" data
1299	100240	0	1	458628	Coffee consumed
1300	1940	0	1	520061	Irritability
1301	10132	0	1	0	Type of progestan-only oral contraceptive used (pilot)
1302	41091	0.258879	1.07625e-157	159058	Episodes containing "Duration of spell" data
1303	10133	0	1	0	Number of columns displayed in round (pilot)
1304	10136	0	1	0	Number of correct matches in round (pilot)
1305	10137	0	1	0	Number of incorrect matches in round (pilot)
1306	10138	0	1	0	Time to complete round (pilot)
1307	100250	-0.140676	0.0708156	14887	Instant coffee intake
1308	10134	0	1	0	Number of rows displayed in round (pilot)
1309	10141	0	1	0	Number of times snap-button pressed (pilot)
1310	1950	0	1	528795	Sensitivity / hurt feelings
1311	41093	0.279597	6.3427e-175	151397	Episodes containing "PCT where patients GP was registered" data
1312	10144	0	1	0	Time taken to complete lights test (pilot)
1313	10145	0	1	0	Pattern of lights displayed (pilot)
1314	10146	0	1	11151	Pattern of lights as remembered (pilot)
1315	10147	0	1	0	Duration to first press of snap-button in each round (pilot)
1316	100260	-0.0840891	0.801757	12459	Added milk to instant coffee
1317	10142	0	1	0	Number of columns displayed (pilot)
1318	10143	0	1	0	Number of rows displayed (pilot)
1319	1960	0	1	533003	Fed-up feelings
1320	100270	-0.185788	0.0932271	5460	Filtered coffee intake
1321	1970	0	1	530485	Nervous feelings
1322	41097	0.193854	2.54991e-82	147885	Episodes containing "Waiting time for hospital admission" data
1323	102970	-0.551358	0.510886	56	Scotch egg intake
1324	100280	-0.152458	0.788765	3832	Added milk to filtered coffee
1325	1980	0	1	530351	Worrier / anxious feelings
1326	100290	1.62813	0.0190446	1842	Cappuccino intake
1327	1990	0	1	525436	Tense / 'highly strung'
1328	100300	0.846259	0.119075	1564	Latte intake
1329	2000	0	1	522244	Worry too long after embarrassment
1330	100310	1.87129	0.0835942	364	Espresso intake
1331	2010	0	1	524336	Suffer from 'nerves'
1332	41106	0.266442	4.30403e-142	137225	Episodes containing "Operation status" data
1333	100320	-0.148232	0.923943	114	Added milk to espresso
1334	2020	0	1	535892	Loneliness, isolation
1335	41107	0.249757	1.83111e-142	153204	Episodes containing "Duration of post-operative stay" data
1336	102980	1.25727	0.057724	474	Other egg intake
1337	41108	0.249572	2.88255e-142	153215	Episodes containing "Duration of pre-operative stay" data
1338	100330	3.24111	0.0106245	289	Other coffee type
1339	2030	0	1	530026	Guilty feelings
1340	2040	0	1	524415	Risk taking
1341	100350	-1.99226	0.491924	181	Added milk to other coffee type
1342	10241	0	1	0	Touchscreen duration (pilot)
1343	2050	-1.0772	1.7641e-17	215934	Frequency of depressed mood in last 2 weeks
1344	100360	-0.497523	6.66179e-05	5037	Decaffeinated coffee
1345	2060	-1.05294	7.97763e-11	215934	Frequency of unenthusiasm / disinterest in last 2 weeks
1346	100370	0.680696	0.287424	3255	Intake of sugar added to coffee
1347	2070	-1.18795	1.32379e-11	215934	Frequency of tenseness / restlessness in last 2 weeks
1348	100380	0.252552	0.436615	2115	Intake of artificial sweetener added to coffee
1349	2080	-1.30891	1.12658e-12	215934	Frequency of tiredness / lethargy in last 2 weeks
1350	100390	0	1	458628	Tea consumed
1351	2090	0	1	541123	Seen doctor (GP) for nerves, anxiety, tension or depression
1352	100400	0.135445	0.175986	21171	Standard tea intake
1353	2100	0	1	542526	Seen a psychiatrist for nerves, anxiety, tension or depression
1354	100410	-0.866089	0.178749	1372	Rooibos tea intake
1355	2110	-0.777475	3.96346e-10	215934	Able to confide
1356	100420	-0.209602	0.483754	1779	Green tea intake
1357	100430	-1.14571	0.0225351	3512	Herbal tea intake
1358	2129	0.845814	1.13781e-190	215934	Answered sexual history questions
1359	100440	-0.487285	0.213095	1006	Other tea intake
1360	2139	-0.0947593	4.96592e-28	191042	Age first had sexual intercourse
1361	2149	-0.0655735	2.05842e-13	178174	Lifetime number of sexual partners
1362	100460	0.282669	0.412611	19404	Added milk to standard tea
1363	2159	0	1	499501	Ever had same-sex intercourse
1364	100470	-0.2964	0.180445	1988	Decaffeinated tea
1365	100480	2.01706	0.00811356	728	Added milk to rooibos tea
1366	2178	0.805818	0.119989	215934	Overall health rating
1367	100490	0.717926	0.00346002	2326	Intake of sugar added to tea
1368	2188	0	1	532227	Long-standing illness, disability or infirmity
1369	100500	-0.852875	0.084512	1796	Intake of artificial sweetener added to tea
1370	100510	0	1	458628	Other non-alcoholic drinks
1371	2207	0	1	544684	Wears glasses or contact lenses
1372	100520	7.1327	0.0607179	1136	Milk intake
1373	2217	-0.0198838	0.0237423	188149	Age started wearing glasses or contact lenses
1374	42024	0	1	0	0
1375	100530	0.161506	0.588136	685	Flavoured milk intake
1376	2227	0	1	543665	Other eye problems
1377	100540	7.75162	0.0477065	584	Low calorie hot chocolate intake
1378	2237	-2.24928	4.61916e-08	215934	Plays computer games
1379	100550	7.1043	0.00860174	1489	Hot chocolate intake
1380	2247	0	1	518881	Hearing difficulty/problems
1381	100560	-1.80661	0.211451	646	Other drink intake
1382	2257	0	1	533633	Hearing difficulty/problems with background noise
1383	2267	2.20476	0.0179381	215934	Use of sun/uv protection
1384	100580	0	1	458628	Alcohol consumed
1385	2277	0.0221062	0.00719747	214465	Frequency of solarium/sunlamp use
1386	100590	0.558431	0.00136806	4602	Red wine intake
1387	2296	-1.19003	7.15182e-09	215934	Falls in the last year
1388	2306	-2.16407	2.11629e-05	215934	Weight change compared with 1 year ago
1389	2316	0	1	533800	Wheeze or whistling in the chest in last year
1390	100630	0.47752	0.211338	1144	Rose wine intake
1391	2335	0	1	539180	Chest pain or discomfort
1392	2345	0	1	548484	Ever had bowel cancer screening
1393	2355	-0.0295014	0.0540187	63735	Most recent bowel cancer screening
1394	2365	0	1	241988	Ever had prostate specific antigen (PSA) test
1395	100670	1.40481	0.00433139	4966	White wine intake
1396	2375	2.43457	0.564864	4	Relative age of first facial hair
1397	2385	0	1	4	Relative age voice broke
1398	2395	4.56797	0.0572512	4	Hair/balding pattern
1399	2405	-0.27765	0.90075	4	Number of children fathered
1400	100710	-0.525939	0.00389246	1962	Beer/cider intake
1401	2415	0	1	4	Had major operations
1402	100720	1.04277	0.0312358	591	Fortified wine intake
1403	10609	0	1	0	Words answer array (pilot)
1404	10610	0	1	3602	Word count (pilot)
1405	10612	0	1	0	Number of words beginning with 'S' (pilot)
1406	100730	1.49837	0.041316	1793	Spirits intake
1407	100740	1.08658	0.266263	378	Other alcohol intake
1408	90037	0.0759048	5.45582e-06	47485	Average acceleration 10:00 - 10:59
1409	2443	0	1	543626	Diabetes diagnosed by doctor
1410	90038	0.0749903	7.06703e-06	47485	Average acceleration 11:00 - 11:59
1411	90039	0.0400325	0.0165017	47485	Average acceleration 12:00 - 12:59
1412	2453	-1.70019	1.58817e-05	215934	Cancer diagnosed by doctor
1413	90040	0.0205832	0.217672	47485	Average acceleration 13:00 - 13:59
1414	100760	0	1	458628	Breakfast cereal consumed
1415	90041	0.0283916	0.0890543	47485	Average acceleration 14:00 - 14:59
1416	2463	0	1	542326	Fractured/broken bones in last 5 years
1417	100770	-0.366639	0.0636546	5214	Porridge intake
1418	90043	0.0492202	0.00319899	47485	Average acceleration 16:00 - 16:59
1419	42026	0	1	0	0
1420	2473	-0.723703	0.011612	215934	Other serious medical condition/disability diagnosed by doctor
1421	2492	0.525767	0.261414	215934	Taking other prescription medications
1422	100800	0.103901	0.374135	4644	Muesli intake
1423	10691	0	1	0	Result ranking (pilot)
1424	10693	0	1	0	Acceptability of each blow result (pilot)
1425	10694	0	1	0	Forced vital capacity (FVC) (pilot)
1426	10695	0	1	0	Forced expiratory volume in 1-second (FEV1) (pilot)
1427	10696	0	1	0	Peak expiratory flow (PEF) (pilot)
1428	10697	0	1	10192	Data points for blow (pilot)
1429	100810	-0.31815	0.183362	947	Oat crunch intake
1430	100820	0.322066	0.3622	725	Sweetened cereal intake
1431	10711	0	1	0	Spirometry method (pilot)
1432	10714	0	1	3430	Spirometry device serial number (pilot)
1433	10717	0	1	0	Number of measurements made (pilot)
1434	100830	0.352061	0.469987	2833	Plain cereal intake
1435	41208	0	1	1227772	Treatment speciality of consultant (polymorphic)
1436	10721	0	1	0	Illness, injury, bereavement, stress in last 2 years (pilot)
1437	10722	0	1	0	Qualifications (pilot)
1438	10723	0	1	0	Vitamin supplements (pilot)
1439	41209	-0.113908	1.03454e-35	178704	Patient classification on admission (polymorphic)
1440	100840	0.0268005	0.849283	3190	Bran cereal intake
1441	100850	0.201214	0.228989	3707	Whole-wheat cereal intake
1442	10740	0	1	0	Frequency of friend/family visits (pilot)
1443	41213	0.0904195	2.24487e-23	180637	Methods of discharge from hospital (polymorphic)
1444	100860	0.303314	0.370445	718	Other cereal intake
1445	10749	0	1	0	Time using mobile phone in last 3 months (pilot)
1446	10767	0	1	0	Spread type (pilot)
1447	100880	1.19955	0.000384804	8881	Dried fruit added to cereal
1448	10776	0	1	0	Bread type/intake (pilot)
1449	100890	-0.478049	0.286494	16870	Milk added to cereal
1450	100900	0.555583	0.170902	3734	Intake of sugar added to cereal
1451	10793	0	1	3660	Hearing difficulty/problems (pilot)
1452	100910	-0.603619	0.0431787	928	Intake of artificial sweetener added to cereal
1453	100920	0.803992	2.12837e-08	30086	Type milk consumed
1454	2624	-0.715842	7.77792e-11	74905	Frequency of heavy DIY in last 4 weeks
1455	10818	0	1	0	Reason for reducing amount of alcohol drunk (pilot)
1456	2634	-0.60824	3.45882e-08	74905	Duration of heavy DIY
1457	10827	0	1	920	Ever stopped smoking for 6+ months (pilot)
1458	100940	0	1	458628	Bread consumed
1459	2644	0	1	143443	Light smokers, at least 100 smokes in lifetime
1460	100950	0.151913	0.0323025	17958	Sliced bread intake
1461	10844	0	1	63	Gestational diabetes only (pilot)
1462	2654	2.16907	0.0833332	105613	Non-butter spread type details
1463	4	0.123172	6.14447e-51	215788	Biometrics duration
1464	10853	0	1	0	Reason former drinker stopped drinking alcohol (pilot)
1465	10854	0	1	0	Other dietary supplements (pilot)
1466	10855	0	1	0	Never eat eggs, dairy, wheat, sugar (pilot)
1467	2664	-1.91137	2.2999e-11	81616	Reason for reducing amount of alcohol drunk
1468	10860	0	1	0	Gas or solid-fuel cooking/heating (pilot)
1469	2674	0	1	294864	Ever had breast cancer screening / mammogram
1470	2684	0.00431212	0.643676	169413	Years since last breast cancer screening / mammogram
1471	10877	0	1	0	Average total household income before tax (pilot)
1472	10886	0	1	0	Difference in mobile phone use compared to one year previously (pilot)
1473	2694	0	1	294559	Ever had cervical smear test
1474	10895	0	1	935	Light smokers, at least 100 smokes in lifetime (pilot)
1475	2704	0.253937	5.71205e-187	189037	Years since last cervical smear test
1476	2714	-0.0468362	1.7686e-08	209885	Age when periods started (menarche)
1477	101020	1.2289	0.164618	2412	Baguette intake
1478	10912	0	1	0	Variation in diet (pilot)
1479	2724	0	1	248497	Had menopause
1480	20081	0.0184749	0.38848	30086	Hour-of-day questionnaire completed
1481	2734	-0.00851345	0.299486	215791	Number of live births
1482	2744	-0.272085	4.93761e-197	173799	Birth weight of first child
1483	2754	-0.313781	6.72699e-225	148061	Age at first live birth
1484	10953	0	1	0	Duration of walks (pilot)
1485	2764	-0.237536	1.59926e-129	147856	Age at last live birth
1486	10962	0	1	0	Duration of moderate physical activity (pilot)
1487	90103	-0.0989271	3.10889e-09	47484	Fraction acceleration <= 12 milli-gravities
1488	2774	0	1	290484	Ever had stillbirth, spontaneous miscarriage or termination
1489	90104	-0.101482	1.21052e-09	47484	Fraction acceleration <= 13 milli-gravities
1490	10971	0	1	0	Duration of vigorous physical activity (pilot)
1491	2784	0	1	294408	Ever taken oral contraceptive pill
1492	101090	-0.634191	0.0600015	877	Bap intake
1493	2794	-0.0261835	0.00390882	171230	Age started oral contraceptive pill
1494	2804	-0.111237	1.48714e-31	155466	Age when last used oral contraceptive pill
1495	2814	0	1	294221	Ever used hormone-replacement therapy (HRT)
1496	2824	-0.25969	1.6568e-41	40437	Age at hysterectomy
1497	2834	0	1	290966	Bilateral oophorectomy (both ovaries removed)
1498	2844	-0.444402	0.0731132	215930	Had other major operations
1499	20104	-0.330451	0.324142	595	Thickness of butter/margarine spread on other bread
1500	20105	0.245768	0.0204679	4852	Liquid used to make porridge
1501	20106	-0.259462	0.010728	9875	Type of yogurt eaten
1502	101160	-0.562546	0.0263937	4090	Bread roll intake
1503	20108	-0.652365	0.527327	1313	Ingredients in canned soup
1504	2867	-0.0878004	1.67024e-06	44309	Age started smoking in former smokers
1505	20109	1.38242	0.118359	2030	Ingredients in homemade soup
1506	2877	-1.0936	0.0330552	44605	Type of tobacco previously smoked
1507	2887	0.132064	6.22345e-13	44194	Number of cigarettes previously smoked daily
1508	2897	0.360472	1.59171e-86	44345	Age stopped smoking
1509	2907	0	1	128605	Ever stopped smoking for 6+ months
1510	2926	-0.0158197	0.408021	40724	Number of unsuccessful stop-smoking attempts
1511	101230	6.87293	0.00869057	540	Naan bread intake
1512	101240	1.45583	0.0633986	567	Garlic bread intake
1513	2936	-2.36883	5.38607e-06	44605	Likelihood of resuming smoking
1514	2946	-0.123247	1.01355e-13	49316	Father's age
1515	101250	1.13316	0.0979937	3907	Crispbread intake
1516	2956	0	1	9190	General pain for 3+ months
1517	101260	-0.382958	0.304123	1174	Oatcakes intake
1518	2966	-0.202869	1.55676e-26	44471	Age high blood pressure diagnosed
1519	101270	0.330003	0.0994704	1712	Other bread intake
1520	20129	-0.059131	0.000132023	54135	Number of columns displayed in round
1521	2976	-1.39926	3.36125e-129	6379	Age diabetes diagnosed
1522	20130	-0.059131	0.000132023	54135	Number of rows displayed in round
1523	2986	0	1	28051	Started insulin within one year diagnosis of diabetes
1524	101300	0	1	296242	Butter/margarine on bread/crackers
1525	3005	0	1	50656	Fracture resulting from simple fall
1526	101310	0.148041	0.0519961	14502	Number of bread slices with butter/margarine
1527	90157	-0.0104117	0.532925	47484	Fraction acceleration <= 1900 milli-gravities
1528	101350	0.696257	0.0780407	1374	Number of baguettes with butter/margarine
1529	90158	-0.0132058	0.429012	47484	Fraction acceleration <= 2000 milli-gravities
1530	3059	0	1	198599	Result ranking
1531	3060	0	1	0	Time of blow measurement
1532	3061	-0.0365128	1.86064e-05	198599	Acceptability of each blow result
1533	3062	-1.17469	0	198599	Forced vital capacity (FVC)
1534	3063	-1.3008	0	198599	Forced expiratory volume in 1-second (FEV1)
1535	3064	-0.98922	0	198599	Peak expiratory flow (PEF)
1536	3065	-0.596239	2.56972e-118	198599	Ordering of blows
1537	3066	0	1	1290743	Data points for blow
1538	90162	-0.0210901	0.206561	47484	Calibration coefficients - y offset
1539	3077	0.302979	0.0276418	215600	Seating box height
1540	3079	0	1	544330	Pace-maker
1541	3081	0.328912	0.000407251	145487	Foot measured for bone density
1542	3082	0	1	321534	Fractured heel
1543	90165	-0.0202019	0.226324	47484	Calibration coefficients - y slope
1544	3083	-0.123018	1.07005e-05	19598	Heel quantitative ultrasound index (QUI), manual entry
1545	3084	-0.129302	3.70074e-06	19598	Heel bone mineral density (BMD), manual entry
1546	101390	-1.43065	0.0367247	314	Number of baps with butter/margarine
1547	3085	-0.102974	0.00022878	19598	Heel Broadband ultrasound attenuation (BUA), manual entry
1548	3088	0	1	541743	Contra-indications for spirometry
1549	3089	0	1	499579	Caffeine drink within last hour
1550	3090	0	1	499579	Used an inhaler for chest within last hour
1551	3086	-0.123637	9.65855e-06	19598	Speed of sound through heel, manual entry
1552	90170	-0.00531785	0.75012	47484	Calibration coefficients - mean temperature
1553	90172	0.0309085	0.0641538	47484	Calibration - minimum x stationary value
1554	90173	-0.0311998	0.0616845	47484	Calibration - maximum x stationary value
1555	101430	-0.636426	0.0255668	2626	Number of bread rolls with butter/margarine
1556	90174	0.0306761	0.0661811	47484	Calibration - minimum y stationary value
1557	3132	0	1	503950	Spirometry device serial number
1558	90175	-0.0191789	0.250716	47484	Calibration - maximum y stationary value
1559	3137	-0.0280246	0.00101713	198599	Number of measurements made
1560	90176	0.0194702	0.24359	47484	Calibration - minimum z stationary value
1561	3140	0	1	294625	Pregnant
1562	3143	-0.0676476	2.09018e-10	125881	Ankle spacing width
1563	90177	-0.0274133	0.100636	47484	Calibration - maximum z stationary value
1564	3144	-0.0974846	5.29216e-20	125877	Heel Broadband ultrasound attenuation, direct entry
1565	3146	-0.0696073	6.20616e-11	125881	Speed of sound through heel
1566	3147	-0.0823742	1.00811e-14	125881	Heel quantitative ultrasound index (QUI), direct entry
1567	3148	-0.0813111	2.20586e-14	125868	Heel bone mineral density (BMD)
1568	3159	0	1	63629	Smoked cigarette or pipe within last hour
1569	3160	0.399891	6.21288e-07	2882	Weight, manual entry
1570	101470	1.02095	0.080216	1524	Number of crackers/crispbreads with butter/margarine
1571	25750	0	1	0	0
1572	3166	0	1	0	Time blood sample collected
1573	630	0.654655	0	215934	Touchscreen duration
1574	101510	-1.50937	0.195394	230	Number of oatcakes with butter/margarine
1575	42032	0	1	0	0
1576	101550	1.56231	0.0130955	728	Number of other bread types with butter/margarine
1577	5	0.1286	2.11784e-55	215932	Sample collection duration
1578	25751	0	1	0	0
1579	20202	0	1	31278	Pancreatic fat - DICOM
1580	3393	0	1	350807	Hearing aid user
1581	3404	0	1	125271	Neck/shoulder pain for 3+ months
1582	3414	0	1	61503	Hip pain for 3+ months
1583	25752	0	1	0	0
1584	3426	-0.767883	0.133195	16527	Job involve night shift work
1585	3436	-0.30958	1.46463e-19	14410	Age started smoking in current smokers
1586	3446	-0.443268	0.759234	14606	Type of tobacco currently smoked
1587	3456	0.508821	1.81927e-50	14431	Number of cigarettes currently smoked daily (current cigarette smokers)
1588	3466	-3.08714	0.00255528	14512	Time from waking to first cigarette
1589	3476	-1.38241	0.0259388	14512	Difficulty not smoking for 1 day
1590	3486	-0.973766	0.0192655	14606	Ever tried to stop smoking
1591	3496	-0.567614	0.0275741	14606	Wants to stop smoking
1592	110001	-0.226112	2.60918e-27	141159	Invitation to complete online 24-hour recall dietary questionnaire, acceptance
1593	3506	-0.31027	0.665605	14606	Smoking compared to 10 years previous
1594	110003	0	1	0	0
1595	110002	0	1	1265239	Invitation to complete online 24-hour recall dietary questionnaire, date sent
1596	110005	-0.34218	1.65107e-49	102602	Invitation to physical activity study, acceptance
1597	110006	0	1	233462	Invitation to physical activity study, date sent
1598	110007	0	1	0	0
1599	110008	0	1	107368	Invitation to assessment centre, date sent
1600	3526	-0.190117	1.17402e-68	127453	Mother's age at death
1601	3536	-0.463138	1.38054e-238	76449	Age started hormone-replacement therapy (HRT)
1602	3546	-0.264098	8.02151e-67	63560	Age last used hormone-replacement therapy (HRT)
1603	3571	0	1	137570	Back pain for 3+ months
1604	3581	-0.314599	8.05399e-185	124226	Age at menopause (last menstrual period)
1605	104920	0.422986	0.0239354	30086	Time spent doing light physical activity
1606	3591	0	1	261146	Ever had hysterectomy (womb removed)
1607	3606	0	1	85180	Chest pain or discomfort walking normally
1608	3616	0	1	31514	Chest pain due to walking ceases when standing still
1609	20001	0	1	50014	Cancer code, self-reported
1610	20002	0	1	1041758	Non-cancer illness code, self-reported
1611	20003	0	1	1334701	Treatment/medication code
1612	20004	0	1	941798	Operation code
1613	20005	0.14549	0.000196788	135344	Email access
1614	20006	-0.12786	2.20997e-06	21412	Interpolated Year when cancer first diagnosed
1615	20007	-0.250712	1.57335e-20	21412	Interpolated Age of participant when cancer first diagnosed
1616	20008	0.0840482	6.12907e-18	159444	Interpolated Year when non-cancer illness first diagnosed
1617	20009	0.0521443	8.61198e-08	159444	Interpolated Age of participant when non-cancer illness first diagnosed
1618	20010	0.139517	6.55875e-53	176841	Interpolated Year when operation took place
1619	3627	-0.52925	1.51574e-13	3734	Age angina diagnosed
1620	20012	0.0837574	0.276618	21460	Method of recording time when cancer first diagnosed
1621	20013	0.747041	1.23073e-296	161974	Method of recording time when non-cancer illness first diagnosed
1622	20014	0.35337	2.54142e-83	177414	Method of recording time when operation occurred
1623	20011	0.105355	6.60456e-31	176841	Interpolated Age of participant when operation took place
1624	20016	-0.501541	1.88952e-263	67794	Fluid intelligence score
1625	20015	-0.753608	0	215600	Sitting height
1626	20018	-1.18987	2.32324e-51	69145	Prospective memory result
1627	20019	0.222289	8.38879e-52	66332	Speech-reception-threshold (SRT) estimate (left)
1628	3637	-0.833583	0.00150626	106903	Frequency of other exercises in last 4 weeks
1629	20021	0.205196	1.76402e-44	66273	Speech-reception-threshold (SRT) estimate (right)
1630	20023	0.913349	0	214651	Mean time to correctly identify matches
1631	20024	0	1	14554	Job code - deduced
1632	20022	-0.359422	5.54898e-276	138572	Birth weight
1633	20025	0	1	0	Time saliva sample collected
1634	3647	-0.793885	0.0075412	106903	Duration of other exercises
1635	20031	0	1	578083	Acceptability of each blow result (text)
1636	20033	0	1	0	0
1637	20034	0	1	0	0
1638	20032	0	1	6509	Acceptability of each blow result (text) (pilot)
1639	20035	0	1	0	Time urine sample collected
1640	20041	0	1	1044	Reason for skipping weight
1641	20042	0	1	2013	Reason for skipping spirometry
1642	3659	0.234045	8.91492e-05	4100	Year immigrated to UK (United Kingdom)
1643	20043	0	1	1628	Reason for skipping grip strength (right)
1644	20045	0	1	445	Reason for skipping waist
1645	20044	0	1	1695	Reason for skipping grip strength (left)
1646	20046	0	1	504	Reason for skipping hip measurement
1647	20047	0	1	824	Reason for skipping standing height
1648	20048	0	1	843	Reason for skipping sitting height
1649	20049	0	1	34929	Blood sample #, note contents
1650	20051	-4.76779	0.239965	597	Reason for skipping arterial stiffness
1651	20052	0	1	1520	Reason for skipping refractometry (left)
1652	3669	-0.06767	0.211706	4905	Lifetime number of same-sex sexual partners
1653	101970	-2.66386	0.101364	1085	Double crust pastry intake
1654	20055	0	1	1399	Reason for skipping refractometry (right)
1655	20056	0	1	410	Reason for skipping visual acuity (right)
1656	20057	0	1	449	Reason for skipping visual acuity (left)
1657	20050	0	1	1583	Reason blood sampling not attempted
1658	20054	0	1	2596	Reason for skipping IOP (left)
1659	101980	-0.688394	0.0875365	1333	Single crust pastry intake
1660	20053	0	1	2403	Reason for skipping IOP (right)
1661	20058	0	1	358	Reason for skipping ECG
1662	20059	0	1	262	Reason ECG not completed
1663	3680	-0.166968	4.71434e-06	10170	Age when last ate meat
1664	20060	-1.98949	0.00139914	518	Reason at-rest ECG performed without bicycle
1665	20062	0	1	3360	Reason for skipping OCT (left)
1666	20061	0	1	3164	Reason for skipping OCT (right)
1667	101990	-0.551149	0.540046	659	Crumble intake
1668	20071	10.1278	0.0194385	189	Reason no saliva sample collected
1669	20072	4.79138	3.14322e-08	1053	Reason no urine sample collected
1670	20074	0.0323742	8.52231e-05	214125	Home location at assessment - east co-ordinate (rounded)
1671	20075	-0.137644	1.09386e-62	214125	Home location at assessment - north co-ordinate (rounded)
1672	20076	0	1	0	0
1673	20077	-0.114123	2.86075e-21	93070	Number of diet questionnaires completed
1674	20078	0	1	458631	When diet questionnaire completion requested
1675	20079	-0.17633	0.0192027	30086	Day-of-week questionnaire completion requested
1676	102000	-0.421885	0.158162	1017	Pizza intake
1677	20080	-0.17633	0.0192027	30086	Day-of-week questionnaire completed
1678	20082	0.25769	2.11204e-33	30086	Duration of questionnaire
1679	20083	0	1	30086	Delay between questionnaire request and completion
1680	3700	0.0277567	0.110371	42352	Time since last menstrual period
1681	20084	0	1	451472	Vitamin and/or mineral supplement use
1682	20085	1.1695	1.11661e-05	5887	Reason for not eating or drinking normally
1683	20086	0.499478	0.00568279	8159	Type of special diet followed
1684	20087	0	1	617109	Types of spread used on bread/crackers
1685	20088	0	1	443469	Types of spreads/sauces consumed
1686	102010	1.15445	0.496439	149	Pancake intake
1687	20089	-0.252559	0.0779695	28681	Type of meals eaten
1688	20090	0	1	594845	Type of fat/oil used in cooking
1689	20091	-0.29858	5.16752e-05	17629	Type of sliced bread eaten
1690	3710	0.0131185	0.482002	36209	Length of menstrual cycle
1691	20092	-0.281759	0.680568	2346	Type of baguette eaten
1692	20093	-0.399028	0.157085	848	Type of large bap eaten
1693	20094	-0.921837	0.0874174	3961	Type of bread roll eaten
1694	20095	-0.0747614	0.492066	4667	Size of white wine glass drunk
1695	20096	0.093481	0.673641	4415	Size of red wine glass drunk
1696	102020	-3.03042	0.00672887	186	Scotch pancake intake
1697	20097	-0.490155	0.0324657	1080	Size of rose wine glass drunk
1698	20098	-0.355989	0.0671191	10813	Thickness of butter/margarine spread on sliced bread
1699	20099	-0.228539	0.345688	1049	Thickness of butter/margarine spread on baguettes
1700	3720	0	1	77704	Menstruating today
1701	20100	0.749323	0.578549	255	Thickness of butter/margarine spread on large baps
1702	20101	-0.245112	0.580998	2047	Thickness of butter/margarine spread on bread rolls
1703	20107	0	1	1204686	Illnesses of father
1704	20102	-0.304439	0.194378	1172	Thickness of butter/margarine spread on crackers/crispbreads
1705	20103	0.327896	0.580077	179	Thickness of butter/margarine spread on oatcakes
1706	20110	0	1	1213452	Illnesses of mother
1707	20111	0	1	1005747	Illnesses of siblings
1708	20112	0	1	12161	Illnesses of adopted father
1709	20113	0	1	13096	Illnesses of adopted mother
1710	20114	0	1	8425	Illnesses of adopted siblings
1711	3731	0	1	43378	Former alcohol drinker
1712	20115	0	1	40583	Country of Birth (non-UK origin)
1713	20117	-0.816967	0.00345537	215934	Alcohol drinker status
1714	20118	0	1	497485	Home area population density - urban or rural
1715	20119	4.51671	0.293385	1545	Current employment status - corrected
1716	102040	1.24088	0.310244	345	Indian snacks intake
1717	20116	-0.820726	3.56209e-09	215934	Smoking status
1718	20122	0.338012	0.374874	516	Bipolar disorder status
1719	20121	0.0641736	0.166619	6509	Cascot confidence score
1720	20124	0	1	15245	Probable recurrent major depression (moderate)
1721	20125	0	1	9401	Probable recurrent major depression (severe)
1722	20126	-0.346904	1.36215e-13	49519	Bipolar and major depression status
1723	20123	0	1	9754	Single episode of probable major depression
1724	3741	0	1	46075	Stomach/abdominal pain for 3+ months
1725	20127	-0.176632	9.29718e-84	172889	Neuroticism score
1726	20128	-0.251182	4.07755e-67	67794	Number of fluid intelligence questions attempted within time limit
1727	20131	-0.0511852	0.000936535	54135	Number of correct matches in round
1728	20132	0.0572645	0.000213926	54135	Number of incorrect matches in round
1729	20133	0.123377	2.87019e-15	52926	Time to complete round
1730	102050	1.03889	0.0522528	514	Croissant intake
1731	3751	0	1	67717	Chest pain or discomfort when walking uphill or hurrying
1732	20135	0	1	0	When fluid intelligence test completed
1733	20134	0	1	0	When pairs test completed
1734	20137	0	1	0	When symbol digit substitution test completed
1735	20138	0	1	0	When numeric memory test completed
1736	102060	-2.15983	0.0240171	524	Danish pastry intake
1737	20136	0	1	0	When trail making test completed
1738	20140	0	1	0	0
1739	3761	0.0153169	0.383057	44838	Age hay fever, rhinitis or eczema diagnosed
1740	20147	0.0172877	0.586994	12924	Errors before selecting correct item in numeric path (trail #1)
1741	20148	0.0525188	0.0415508	19969	Errors before selecting correct item in alphanumeric path (trail #2)
1742	20149	0.114727	2.77237e-13	52402	Interval between previous point and current one in numeric path (trail #1)
1743	102070	0.326612	0.380016	1276	Scone intake
1744	20150	-1.29342	0	161557	Forced expiratory volume in 1-second (FEV1), Best measure
1745	20152	0	1	353336	Reproduciblity of spirometry measurement using ERS/ATS criteria
1746	20151	-1.22329	0	161557	Forced vital capacity (FVC), Best measure
1747	20153	-0.39136	6.03215e-182	75972	Forced expiratory volume in 1-second (FEV1), predicted
1748	20155	0.0704772	1.15117e-05	50042	Interval between previous point and current one in alphanumeric path (trail #2)
1749	20154	-1.34538	0	75972	Forced expiratory volume in 1-second (FEV1), predicted percentage
1750	3773	0	1	118076	Knee pain for 3+ months
1751	20156	0.133638	7.01508e-16	46860	Duration to complete numeric path (trail #1)
1752	20159	-0.207317	5.20487e-41	54093	Number of symbol digit matches made correctly
1753	20160	0	1	543328	Ever smoked
1754	102080	0	1	458628	Yogurt/ice-cream consumers
1755	20157	0.199249	2.25582e-33	46860	Duration to complete alphanumeric path (trail #2)
1756	20161	0.520449	1.19356e-221	58235	Pack years of smoking
1757	20162	0.557975	8.90086e-255	58235	Pack years adult smoking as proportion of life span exposed to smoking
1758	20165	0.726964	0.043598	56177	FI1 : numeric addition test
1759	20158	0	1	23445	DXA images
1760	20167	-0.852914	0.585179	56179	FI2 : identify largest number
1761	20169	-0.509285	1.32796e-20	56176	FI3 : word interpolation
1762	3786	-0.0643623	0.0126318	23058	Age asthma diagnosed
1763	20171	-0.28901	1.37446e-05	55904	FI4 : positional arithmetic
1764	102090	-0.211566	0.0417906	11113	Yogurt intake
1765	20173	-0.183603	0.000847564	54971	FI5 : family relationship calculation
1766	20175	-0.635697	0.000757772	49366	FI6 : conditional arithmetic
1767	20177	-0.336662	0.000468342	40022	FI7 : synonym
1768	20179	0.519479	1.66853e-05	36480	FI8 : chained arithmetic
1769	20181	-0.547589	0.015911	13755	FI9 : concept interpolation
1770	20183	-0.336602	0.0706078	8924	FI10 : arithmetic sequence recognition
1771	3799	0	1	105937	Headaches for 3+ months
1772	20185	-0.939853	0.0438134	3818	FI11 : antonym
1773	20187	-0.601371	0.00103402	2459	FI12 : square sequence recognition
1774	20189	1.37566	0.0183192	494	FI13 : subset inclusion logic
1775	20191	-0.293232	1.49386e-83	56369	Fluid intelligence score
1776	20192	0	1	0	0
1777	3809	0	1	0	Time since last prostate specific antigen (PSA) test
1778	20193	1.85062	0.0369236	188	FI14 : alphanumeric substitution
1779	20195	-0.211798	9.94321e-43	54093	Number of symbol digit matches attempted
1780	20196	0	1	116654	First code array presented
1781	20198	0	1	3276744	Test array presented
1782	20199	0	1	0	0
1783	20200	-0.0134974	0.38236	54231	Values wanted
1784	102120	0.310415	0.36355	3049	Ice-cream intake
1785	20201	0	1	32323	Dixon technique for internal fat - DICOM
1786	20203	0	1	10130	Liver images - gradient echo - DICOM
1787	20204	0	1	31974	Liver Imaging - T1 ShMoLLI - DICOM
1788	20205	0	1	21152	ECG datasets
1789	20206	0	1	21734	Measurements of pancreas volume - DICOM
1790	20207	0	1	33146	Scout images for heart MRI - DICOM
1791	20208	0	1	33061	Long axis heart images - DICOM
1792	20209	0	1	32925	Short axis heart images - DICOM
1793	102130	0	1	458628	Dessert consumers
1794	20210	0	1	31756	Aortic distensibilty images - DICOM
1795	20211	0	1	31636	Cine tagging images - DICOM
1796	3829	0.159308	3.84431e-27	67076	Number of stillbirths
1797	20213	0	1	31499	Blood flow images - DICOM
1798	20214	0	1	31673	Experimental shMOLLI sequence images - DICOM
1799	20212	0	1	31695	Left ventricular outflow tract images - DICOM
1800	20217	0	1	0	0
1801	20218	0	1	0	0
1802	20215	0	1	0	0
1803	102140	-0.454733	0.100478	1084	Milk-based pudding intake
1804	20219	0	1	25017	Susceptibility weighted brain images - DICOM
1805	20216	0	1	0	0
1806	3839	0.0969097	5.64083e-11	66907	Number of spontaneous miscarriages
1807	20224	0	1	0	0
1808	20225	0	1	0	0
1809	20220	0	1	0	0
1810	20227	0	1	0	0
1811	20221	0	1	0	0
1812	20229	-0.022943	0.137575	54231	Values entered
1813	20230	0.200914	1.02798e-38	54231	Duration to entering value
1814	102150	-1.07025	0.262507	641	Other milk-based pudding intake
1815	6219	-0.279505	0.835602	12	Impedance of leg, manual entry (right)
1816	3849	-0.121978	1.81261e-16	66680	Number of pregnancy terminations
1817	20235	0	1	0	0
1818	20240	-0.185731	1.68557e-31	50789	Maximum digits remembered correctly
1819	20242	0.249416	0.00760846	56369	Fluid intelligence completion status
1820	3859	1.05282	0.263245	7779	Reason former drinker stopped drinking alcohol
1821	20244	0.147966	0.119849	54135	Pairs matching completion status
1822	20245	0.295981	0.00703349	54882	Symbol digit completion status
1823	20246	0.386259	2.83334e-11	54975	Trail making completion status
1824	20247	0.00522514	0.869591	12924	Total errors traversing numeric path (trail #1)
1825	20248	0.125239	1.1675e-06	19969	Total errors traversing alphanumeric path (trail #2)
1826	20249	0	1	0	0
1827	102170	-3.82598	0.301909	207	Soya dessert intake
1828	20250	0	1	0	0
1829	20251	0	1	19650	Susceptibility weighted brain images - NIFTI
1830	20252	0	1	22392	T1 structural brain images - NIFTI
1831	20253	0	1	21708	T2 FLAIR structural brain images - NIFTI
1832	20255	0	1	0	0
1833	3872	-0.224329	2.52415e-22	28204	Age of primiparous women at birth of child
1834	20256	0	1	0	0
1835	20257	0	1	0	0
1836	20258	0	1	0	0
1837	102180	-0.248783	0.307296	1283	Fruitcake intake
1838	20261	0	1	0	0
1839	20262	0	1	0	0
1840	20254	0	1	17573	Liver images - IDEAL protocol - DICOM
1841	3882	-0.404352	2.15715e-42	17164	Age at bilateral oophorectomy (both ovaries removed)
1842	102190	-0.162142	0.393937	3975	Cake intake
1843	20270	0	1	0	0
1844	20271	0	1	0	0
1845	20272	0	1	0	0
1846	20273	0	1	0	0
1847	20274	0	1	0	0
1848	20275	0	1	0	0
1849	20276	0	1	0	0
1850	3894	-0.604059	1.46761e-07	1685	Age heart attack diagnosed
1851	102200	-0.576731	0.420234	297	Doughnut intake
1852	102210	-0.47043	0.169094	586	Sponge pudding intake
1853	6	0.00353516	0.666576	215908	Conclusion duration
1854	3912	0	1	5486	Adopted father still alive
1855	102220	1.42092	0.0678376	677	Cheesecake intake
1856	102230	-1.88744	0.126969	2530	Other dessert intake
1857	3942	0	1	5903	Adopted mother still alive
1858	102250	0	1	458628	Sweet snack consumers
1859	12139	-0.176508	0.736732	15417	Believed safe to perform brain MRI scan
1860	12140	-0.172983	0.745907	15417	Believed safe to perform abdominal MRI scan
1861	12141	1.51972	0.481391	15417	Believed safe to perform DXA scan
1862	12143	-0.1462	5.8963e-05	10055	Weight (pre-imaging)
1863	12144	-0.485731	6.04968e-41	10055	Height
1864	12148	0.0844757	0.00403761	15417	Number of imaging stages blocked at screening
1865	102260	-0.646808	0.00317772	2174	Chocolate bar intake
1866	102270	0.813128	0.227417	153	White chocolate intake
1867	3972	0.0447713	0.578395	2498	Number of adopted brothers
1868	102280	-0.396698	0.0754713	2077	Milk chocolate intake
1869	3982	0.077757	0.333303	2519	Number of adopted sisters
1870	102290	-0.641903	0.0176407	1619	Dark chocolate intake
1871	3992	0.167969	0.0509713	2509	Age emphysema/chronic bronchitis diagnosed
1872	12187	0.389539	0.0168826	15203	Brain MRI measuring method
1873	12188	1.01276	0.125753	14557	Brain MRI measurement completed
1874	102300	1.56045	0.0232341	296	Chocolate-covered raisin intake
1875	102310	-0.713859	0.17996	1790	Chocolate sweet intake
1876	4012	0.140365	0.0283475	4384	Age deep-vein thrombosis (DVT, blood clot in leg) diagnosed
1877	102320	1.14592	0.408461	262	Diet sweets intake
1878	20401	-0.291061	0.559563	72614	Ever addicted to any substance or behaviour
1879	20400	0	1	157387	Date of completing mental health questionnaire
1880	20403	-0.810905	0.000338041	65457	Amount of alcohol drunk on a typical drinking day
1881	20404	3.42197	0.199594	1229	Ever physically dependent on alcohol
1882	20405	0.270002	0.488514	72614	Ever had known person concerned about, or recommend reduction of, alcohol consumption
1883	20406	1.29168	0.20169	3531	Ever addicted to alcohol
1884	20407	0.966872	0.266582	32565	Frequency of failure to fulfil normal expectations due to drinking alcohol in last year
1885	20408	-0.465539	0.381995	32565	Frequency of memory loss due to drinking alcohol in last year
1886	4022	-0.131554	0.205579	1742	Age pulmonary embolism (blood clot in lung) diagnosed
1887	20410	-0.0370872	0.682791	1698	Age when known person last commented about drinking habits
1888	102330	0.286957	0.322	1930	Sweets intake
1889	20409	-0.641447	0.171905	32565	Frequency of feeling guilt or remorse after drinking alcohol in last year
1890	20411	-0.257455	0.687281	72614	Ever been injured or injured someone else through drinking alcohol
1891	20412	2.18665	0.225619	32565	Frequency of needing morning drink of alcohol after heavy drinking session in last year
1892	20415	-0.815498	0.391207	1229	Ongoing addiction to alcohol
1893	20413	-0.624158	0.157632	32565	Frequency of inability to cease drinking in last year
1894	20417	-0.0361263	0.667162	25603	Tense, sore, or aching muscles during worst period of anxiety
1895	20414	-0.611242	0.143792	72614	Frequency of drinking alcohol
1896	12223	0.424203	0.04377	15233	Abdominal MRI measuring method
1897	20420	0.0441016	0.085258	20527	Longest period spent worried or anxious
1898	12224	0	1	34456	Abdominal MRI measurement completed
1899	20416	-0.878742	0.0291026	65457	Frequency of consuming six or more units of alcohol
1900	20419	0.172387	0.125959	25603	Difficulty concentrating during worst period of anxiety
1901	102340	1.37158	0.313466	2210	Chocolate-covered biscuits intake
1902	20421	-0.502105	0.00382618	72614	Ever felt worried, tense, or anxious for most of a month or longer
1903	20426	0.121174	0.174368	25603	Restless during period of worst anxiety
1904	20418	0.258396	0.65927	25603	Impact on normal roles during worst period of anxiety
1905	20423	0.190817	0.101575	25603	Keyed up or on edge during worst period of anxiety
1906	20422	-0.0862404	0.326741	25603	More irritable than usual during worst period of anxiety
1907	20425	-0.6871	0.0469433	72614	Ever worried more than most people would in similar situation
1908	4041	0	1	10560	Gestational diabetes only
1909	20427	0.150547	0.332104	25603	Frequent trouble falling or staying asleep during worst period of anxiety
1910	20433	0.0102979	0.560593	42682	Age at first episode of depression
1911	20434	-0.12084	1.61415e-11	41402	Age at last episode of depression
1912	20429	-0.140715	0.131544	25603	Easily tired during worst period of anxiety
1913	102350	-0.773046	0.120373	2730	Chocolate biscuits intake
1914	20431	1.21333	0.669353	3531	Ever addicted to a behaviour or miscellanous
1915	20432	-1.7053	0.1084	606	Ongoing behavioural or miscellanous addiction
1916	20435	-1.5649	0.0103023	46524	Difficulty concentrating during worst depression
1917	4056	-0.563344	1.2004e-09	2336	Age stroke diagnosed
1918	102360	0.208563	0.0709495	5596	Sweet biscuits intake
1919	20442	0.0376547	0.0306823	44021	Lifetime number of depressed periods
1920	20436	-1.56355	0.0023158	46524	Fraction of day affected during worst episode of depression
1921	20437	-0.690028	0.00602101	46524	Thoughts of death during worst depression
1922	20438	-0.388562	0.00400358	46524	Duration of worst depression
1923	20439	-1.42694	0.0035558	46524	Frequency of depressed days during worst episode of depression
1924	20441	0.150409	0.515302	72614	Ever had prolonged loss of interest in normal activities
1925	20448	-0.396451	0.315437	46524	Professional informed about depression
1926	20440	-0.909689	0.00444746	46524	Impact on normal roles during worst period of depression
1927	12253	-0.116332	0.577862	15355	DXA measuring method
1928	12254	0	1	34862	DXA measurement completed
1929	20445	-0.795128	0.0234443	46524	Depression possibly related to childbirth
1930	20447	-0.147329	0.590306	46524	Depression possibly related to stressful or traumatic event
1931	20454	-0.555478	0.03727	13345	Maximum frequency of taking cannabis
1932	20455	-0.0730245	0.0208471	13345	Age when last took cannabis
1933	102370	1.26417	0.0758365	1976	Cereal bar intake
1934	20457	-1.94324	0.257264	194	Ongoing addiction or dependence on illicit or recreational drugs
1935	4067	0	1	9850	Facial pains for 3+ months
1936	20453	-0.673923	0.0946405	72614	Ever taken cannabis
1937	20456	-4.2474	0.0287192	3531	Ever addicted to illicit or recreational drugs
1938	20461	-0.0253929	0.692653	3263	Age when first had unusual or psychotic experience
1939	20458	-0.995713	0.0292091	72614	General happiness
1940	4079	0.290633	7.24261e-259	203118	Diastolic blood pressure, automated reading
1941	4080	1.03227	0	203116	Systolic blood pressure, automated reading
1942	20465	-0.176353	0.13352	1033	Number of times heard an un-real voice
1943	20460	-0.767453	0.00480881	72614	Belief that own life is meaningful
1944	20459	0.480784	0.384182	72614	General happiness with own health
1945	20462	-1.4421	0.0656049	3782	Distress caused by unusual or psychotic experiences
1946	20463	-0.803985	0.138396	72614	Ever heard an un-real voice
1947	20470	0.390696	0.0569214	379	Number of times believed in an un-real conspiracy against self
1948	20466	1.62191	0.469335	3782	Ever prescribed a medication for unusual or psychotic experiences
1949	20467	-1.28076	0.174414	3782	Frequency of unusual or psychotic experiences in past year
1950	20473	-0.00266284	0.97311	2160	Number of times seen an un-real vision
1951	20468	0.299831	0.710311	72614	Ever believed in an un-real conspiracy against self
1952	20471	0.251974	0.601616	72614	Ever seen an un-real vision
1953	20476	0.477717	0.00998306	393	Number of times believed in un-real communications or signs
1954	4093	0	1	207306	Fractured heel (left)
1955	20474	-0.81205	0.199185	72614	Ever believed in un-real communications or signs
1956	4095	0.552176	3.40046e-07	69281	Heel ultrasound method (right)
1957	20480	-0.232743	0.314822	72614	Ever self-harmed
1958	4096	0	1	207467	Fractured heel (right)
1959	20481	-0.259756	0.80433	3752	Self-harmed in past year
1960	12291	-2.87178	0.431658	10019	Carotid ultrasound measuring method
1961	20484	4.8	0.0374445	1909	Attempted suicide in past year
1962	12292	0	1	23188	Carotid ultrasound measurement completed
1963	20486	-0.0832508	0.863584	12174	Contemplated self-harm in past year
1964	20483	-0.488608	0.163446	3752	Ever attempted suicide
1965	20485	0.255741	0.199405	72614	Ever contemplated self-harm
1966	20487	-0.299297	0.214601	72614	Felt hated by family member as a child
1967	20489	-0.353213	0.127845	72614	Felt loved as a child
1968	20482	0.121339	0.799158	3752	Number of times self-harmed
1969	20492	-0.142377	0.620816	19632	Longest period of mania or irritability
1970	20488	-0.62487	0.0293761	72614	Physically abused by family as a child
1971	20494	-0.481216	0.275013	36622	Felt irritable or had angry outbursts in past month
1972	20495	-0.284963	0.414298	72614	Avoided activities or situations because of previous stressful experience in past month
1973	20496	-1.00342	0.0260073	36622	Felt distant from other people in past month
1974	20490	-0.535844	1.4876e-05	72614	Sexually molested as a child
1975	20498	-0.231193	0.47272	72614	Felt very upset when reminded of stressful experience in past month
1976	20499	-0.915921	0.0041994	72614	Ever sought or received professional help for mental distress
1977	20500	-0.594651	0.098833	72614	Ever suffered mental distress preventing usual activities
1978	20501	-1.06008	0.0566661	72614	Ever had period of mania / excitability
1979	20502	-1.30931	1.22297e-05	72614	Ever had period extreme irritability
1980	20503	-3.79953	0.182169	3531	Ever addicted to prescription or over-the-counter medication
1981	20504	-4.5203	0.0224914	616	Ongoing addiction or dependence to over-the-counter medication
1982	20505	-0.293194	0.153243	72614	Recent easy annoyance or irritability
1983	20497	-0.347197	0.306844	72614	Repeated disturbing thoughts of stressful experience in past month
1984	20506	-0.512716	0.0177301	72614	Recent feelings or nervousness or anxiety
1985	20507	-0.435421	0.0293206	72614	Recent feelings of inadequacy
1986	20509	-0.462619	0.0266053	72614	Recent inability to stop or control worrying
1987	20510	-0.432088	0.0413826	72614	Recent feelings of depression
1988	20508	-0.358239	0.303614	72614	Recent trouble concentrating on things
1989	20512	-0.385086	0.0543176	72614	Recent feelings of foreboding
1990	20511	-0.350977	0.286457	72614	Recent poor appetite or overeating
1991	20514	-0.507583	0.0513787	72614	Recent lack of interest or pleasure in doing things
1992	12323	-0.0656113	0.574866	13195	12-lead ECG measuring method
1993	20513	-0.436913	0.00825734	72614	Recent thoughts of suicide or self-harm
1994	20515	-0.573236	0.0143382	72614	Recent trouble relaxing
1995	20518	-0.863588	0.00522887	72614	Recent changes in speed/amount of moving or speaking
1996	20519	-0.515644	0.0745972	72614	Recent feelings of tiredness or low energy
1997	20516	-0.312079	0.248198	72614	Recent restlessness
1998	20521	-0.739837	0.00207996	72614	Belittlement by partner or ex-partner as an adult
1999	20522	-0.362839	1.39983e-05	72614	Been in a confiding relationship as an adult
[truncated: 1,652 more rows]
