# Supplementary material for: A mathematical model that predicts human biological age from physiological traits identifies environmental and genetic factors that influence aging
Source: eLife. 2025 Jun 11;13:RP92092. doi: 10.7554/eLife.92092 (PMC12158426; doi:10.7554/eLife.92092)
Supplement: Supplementary file 9. [file elife-92092-supp9.xlsx]

## Sheet: Liner Regression p-values
UKBB Field Id	UKBB field description	Combined number of participants	Linear regression beta	Full male model	Male model dropout 1	Male model dropout 2	Male model dropout 3	Male model dropout 4	Male model dropout 5	Male model dropout 6	Male model dropout 7	Male model dropout 8	Male model dropout 9	Male model dropout 10	Full female model	Female model dropout 1	Female model dropout 2	Female model dropout 3	Female model dropout 4	Female model dropout 5	Female model dropout 6	Female model dropout 7	Female model dropout 8	Female model dropout 9	Female model dropout 10
19	Heel ultrasound method	146515	-0.742368	6.17836e-23	2.62757e-26	1.18769e-16	2.26016e-21	1.39765e-25	6.45141e-21	9.71354e-24	1.12075e-22	5.74576e-26	7.52797e-25	5.77047e-26	4.91422e-10	3.74072e-22	2.81976e-08	1.50205e-09	1.41122e-13	2.22222e-08	1.60396e-12	2.69127e-09	1.22501e-11	1.29876e-09	4.57607e-10
23	Spirometry method	199715	-0.941305	0.00681555	0.00375904	0.00121748	0.00373402	0.00573112	0.0191027	0.00732907	0.0124536	0.00653041	0.00355802	0.00241215	2.18433e-06	1.41747e-05	8.15332e-07	1.20307e-11	3.02187e-06	1.14141e-05	6.48005e-05	9.0681e-16	2.01273e-06	3.13022e-07	4.90688e-08
31	Sex	215945	1.22485	0.0100094	0.0102893	0.00107458	0.00350006	0.0043419	0.0045092	0.0102373	0.000638903	0.496355	0.0260716	0.0131132	0.747983	0.504341	0.784967	0.590377	0.87771	0.888652	0.781885	0.64349	0.777917	0.693743	0.714249
34	Year of birth	215945	-0.0175145	0.106185	0.284817	0.0981503	0.132364	0.0897477	0.092079	0.111002	0.988945	0.10779	0.0474681	0.0334793	0.0327595	0.16169	0.0330113	0.0187069	0.03247	0.0338339	0.04489	0.194763	0.0324105	0.0118127	0.00874694
52	Month of birth	215945	-0.077994	0.338208	0.109681	0.201608	0.23993	0.336736	0.298898	0.23037	0.0812873	0.153657	0.209393	0.172847	0.0576801	0.0465503	0.045961	0.0544279	0.0304687	0.0516858	0.0460409	0.0335733	0.0921708	0.129155	0.0557145
54	UK Biobank assessment centre	566880	0	1	1	1	1	1	1	1	1	1	1	1	1	1	1	1	1	1	1	1	1	1	1
55	Month of attending assessment centre	215945	-0.384409	1.10076e-50	4.20471e-39	2.45921e-41	1.60909e-58	3.3147e-82	8.28011e-55	2.23566e-10	4.2727e-54	2.51111e-57	8.59447e-60	2.28019e-53	1.88232e-18	3.22627e-17	1.22348e-18	2.64359e-19	2.33192e-43	6.30354e-21	0.00159368	9.30815e-09	1.13501e-19	1.33636e-18	7.5173e-21
53	Date of attending assessment centre	566885	0	1	1	1	1	1	1	1	1	1	1	1	1	1	1	1	1	1	1	1	1	1	1
84	Cancer year/age first occurred	21412	0.0312609	0.177556	0.290751	0.161436	0.252307	0.336901	0.148866	0.187484	0.152564	0.151597	0.241138	0.151633	0.247881	0.346845	0.226183	0.18651	0.12182	0.0532872	0.182911	0.346063	0.500112	0.181817	0.431933
92	Operation year/age first occurred	176848	0.0563639	5.6928e-21	1.49157e-16	1.62737e-22	2.44267e-18	7.59032e-23	1.83106e-18	4.52863e-21	2.7181e-22	3.04374e-24	1.43705e-22	7.83519e-08	6.29708e-10	0.000182454	4.59728e-11	8.69029e-09	2.03792e-10	2.38459e-11	3.28376e-07	1.92526e-07	4.82054e-08	8.77527e-10	3.33081e-18
93	Systolic blood pressure, manual reading	19219	-0.251091	0.0531538	0.0162738	0.0397892	2.17458e-05	0.00752638	0.0122819	0.00149099	0.302471	0.343218	0.0135591	0.0113998	2.71448e-20	5.04774e-30	5.46534e-21	6.00612e-36	1.50222e-08	2.00915e-26	1.90596e-32	3.32918e-18	2.33412e-12	4.6255e-20	1.23525e-21
94	Diastolic blood pressure, manual reading	19219	-0.145506	1.74054e-08	6.3871e-07	4.90462e-08	0.000139053	1.26465e-17	2.07042e-07	1.90327e-05	2.27215e-10	1.5713e-09	4.01549e-08	1.13962e-08	9.06027e-08	9.87056e-12	3.69314e-09	1.62294e-16	2.13493e-06	3.00817e-08	4.03624e-13	4.35247e-08	0.00379541	1.56984e-07	8.63192e-09
95	Pulse rate (during blood-pressure measurement)	19219	0.0862051	0.0263552	0.0232108	0.00718955	0.259832	0.904747	0.0183066	0.384251	0.549579	0.000559828	0.0586443	0.294649	0.00154729	0.108794	0.00370996	0.702362	0.248599	0.443704	0.00524193	0.228726	2.84265e-05	0.00136137	0.000438732
102	Pulse rate, automated reading	203126	-0.12099	0.000227209	0.000215445	8.30531e-05	1.25815e-05	0.00154747	0.000197582	5.43828e-06	4.36248e-07	0.00124301	1.81898e-05	1.56647e-07	2.55163e-46	2.23183e-54	1.96233e-44	2.35363e-58	0.000823091	7.45446e-48	3.40742e-47	1.43368e-49	1.54752e-46	4.44246e-41	3.44198e-53
111	Aide-memoire completed	521993	0	1	1	1	1	1	1	1	1	1	1	1	1	1	1	1	1	1	1	1	1	1	1
120	Birth weight known	215938	-0.110335	2.04406e-14	1.26997e-11	1.10446e-13	8.40848e-13	4.24335e-16	6.43445e-14	3.43786e-16	2.8374e-17	5.71549e-17	4.83737e-12	3.96141e-33	1.13191e-10	6.10271e-07	2.79723e-09	4.47268e-12	6.454e-18	4.22669e-11	2.41278e-09	3.55281e-08	3.24033e-10	1.03927e-12	2.9101e-15
129	Place of birth in UK - north co-ordinate	210437	0.0741246	1.09158e-55	7.67663e-28	5.22187e-14	1.62129e-45	7.91769e-75	2.07881e-56	2.15839e-51	3.80178e-67	4.98625e-52	2.00357e-63	7.1778e-23	4.16427e-19	0.0164439	1.79188e-06	4.7158e-15	2.84069e-32	3.607e-24	6.94957e-12	5.28377e-13	4.22459e-21	3.62115e-24	3.6903e-05
130	Place of birth in UK - east co-ordinate	210437	0.00967509	0.15852	0.923126	6.56876e-06	0.623047	0.0663485	0.121674	0.381626	0.241393	0.584417	0.0502914	0.0195569	0.243693	6.74322e-05	1.17932e-05	0.000553926	0.510554	0.50025	0.00572837	0.0092808	0.221669	0.320511	0.148445
132	Job code	386867	0	1	1	1	1	1	1	1	1	1	1	1	1	1	1	1	1	1	1	1	1	1	1
190	Reason lost to follow-up	412	2.57907	0.0672477	0.085819	0.0998502	0.0967398	0.0605472	0.0473958	0.0604978	0.0540884	0.165259	0.0962059	0.0846102	0.0199997	0.0328843	0.0214238	0.105655	0.0342757	0.00878269	0.0186674	0.0256087	0.00537709	0.019189	0.0208663
191	Date lost to follow-up	1298	0	1	1	1	1	1	1	1	1	1	1	1	1	1	1	1	1	1	1	1	1	1	1
400	Time to complete round	212747	-0.481252	1e-255	1e-255	1e-255	1e-255	1e-255	1e-255	1e-255	1.44165e-99	1e-255	1e-255	1e-255	1e-255	1e-255	1e-255	1e-255	1e-255	1e-255	1e-255	1.78545e-62	1e-255	1e-255	1e-255
670	Type of accommodation lived in	215945	-5.29771	6.01866e-05	0.00013432	3.34796e-05	0.000125187	1.66899e-05	2.76458e-05	3.18878e-05	0.00020244	2.91288e-05	3.74114e-05	8.62466e-06	3.2039e-05	3.28633e-06	0.000100617	8.91781e-05	6.64996e-06	3.50656e-05	1.93047e-05	0.000142972	5.36793e-05	2.39174e-05	1.18039e-06
680	Own or rent accommodation lived in	215494	-0.826224	1.88871e-11	2.04748e-08	8.54544e-12	3.69692e-12	2.08146e-11	1.28051e-10	4.29343e-12	9.64166e-11	5.34686e-12	3.557e-12	5.59408e-23	2.48331e-13	1.84494e-09	7.69456e-12	8.59767e-16	6.7674e-12	7.68195e-16	6.77811e-13	8.55854e-14	3.58509e-15	2.86262e-14	6.49075e-22
728	Number of vehicles in household	215494	3.51286	0.00467436	0.00714057	0.0186935	0.00175961	0.00332178	0.00417566	0.00171784	0.000886239	0.00257125	0.0014903	0.00135113	8.64756e-05	0.000100033	0.000158349	0.000216395	6.054e-05	0.000529431	5.79434e-06	0.00702016	9.34504e-05	7.28276e-05	0.00016553
738	Average total household income before tax	215494	1.30651	3.43645e-189	7.33402e-191	1.84583e-179	2.16037e-202	2.02823e-201	8.21128e-192	1.73603e-196	3.20923e-92	3.23125e-198	1.1612e-197	1.21651e-278	5.45531e-228	1.36806e-228	6.68288e-218	3.29632e-258	1.80824e-236	2.73871e-239	4.04923e-222	5.73248e-128	3.44677e-229	1.86721e-230	8.32716e-266
757	Time employed in main current job	116359	0.0231197	0.670833	0.34206	0.54223	0.766329	0.287039	0.718573	0.866082	0.386571	0.375092	0.600153	0.354004	0.0318273	0.268939	0.16647	0.0227272	3.08444e-06	0.0136681	0.0732122	0.173739	0.135135	0.00851843	0.28008
796	Distance between home and job workplace	104498	0.0768442	0.0652778	0.0351491	0.175387	0.0905647	0.126023	0.0905106	0.0386273	0.0475466	0.129717	0.13882	0.00388083	1.17154e-11	2.83956e-15	1.27776e-10	7.46738e-11	9.42292e-12	3.96032e-11	1.5533e-11	4.68005e-05	1.23169e-11	1.00181e-10	3.57805e-17
806	Job involves mainly walking or standing	116755	-1.623	0.266004	0.313653	0.136875	0.318222	0.44593	0.206797	0.219856	0.499229	0.054788	0.204989	0.00719244	0.0243447	0.0678478	0.0205511	0.028913	0.111209	0.0275086	0.0261759	0.0386303	0.0199902	0.0236098	0.0309936
816	Job involves heavy manual or physical work	116755	1.69477	0.0400085	0.19009	0.0567123	0.142577	0.0104617	0.0325053	0.0180912	0.0419248	0.0414875	0.0322492	0.00940061	0.000849801	0.0227948	0.000976301	0.00266291	0.000705536	0.000956636	0.000391448	0.00487809	0.000348472	0.000758941	0.000204119
826	Job involves shift work	116755	0.403028	0.0952187	0.0573202	0.0314546	0.0869737	0.104239	0.0836123	0.101491	0.182857	0.208449	0.056685	0.1299	0.216479	0.0518078	0.134452	0.0905668	0.0583829	0.2171	0.10563	0.204382	0.112535	0.203195	0.190524
845	Age completed full time education	149417	0.250508	2.59635e-89	3.50806e-92	3.65143e-86	2.84131e-97	1.73083e-92	2.3309e-93	1.20463e-83	8.56887e-44	4.75141e-92	5.77158e-95	4.81098e-131	2.73746e-140	6.77273e-121	2.12417e-149	1.6326e-156	2.00705e-165	9.65313e-157	3.13723e-142	1.95342e-87	3.35374e-160	3.62625e-150	1.03176e-153
894	Duration of moderate activity	156102	-0.0655593	4.20832e-48	1.0905e-64	1.2869e-50	6.37664e-55	2.93889e-58	2.85504e-38	2.03305e-55	2.94361e-57	5.23206e-50	7.5296e-65	1.26547e-30	3.82099e-12	1.73291e-11	4.52485e-10	4.84177e-13	1.80754e-15	5.98264e-13	2.36835e-11	0.000324248	3.12948e-10	6.64312e-10	6.89746e-75
943	Frequency of stair climbing in last 4 weeks	215224	1.12693	1.19693e-07	1.41173e-07	1.2408e-07	1.89175e-08	1.68759e-07	2.64837e-08	3.04626e-07	5.53619e-05	1.72735e-08	1.5363e-09	1.73209e-10	1.10969e-20	7.76803e-23	3.28328e-20	1.98228e-23	5.21708e-21	5.44411e-20	4.92164e-20	2.5956e-15	1.09703e-20	1.03729e-20	2.15863e-21
971	Frequency of walking for pleasure in last 4 weeks	159123	0.823086	1.62863e-05	2.91694e-05	9.69051e-05	1.00978e-05	6.07396e-05	1.31556e-05	2.14958e-05	0.000536056	1.02206e-05	1.53495e-06	8.70835e-10	1.89489e-08	2.52893e-09	1.42879e-08	1.22429e-08	6.225e-11	2.54727e-08	1.38608e-08	1.79281e-07	6.27537e-09	3.24902e-08	9.50914e-07
981	Duration walking for pleasure	159123	0.95344	2.39627e-09	3.18208e-09	4.7593e-07	1.01558e-08	1.93605e-07	1.87483e-08	7.44623e-10	1.64636e-10	4.96414e-11	1.18279e-09	1.97574e-12	8.74156e-12	1.57284e-09	1.73286e-11	1.04399e-11	2.54531e-13	2.14196e-12	1.82771e-14	8.84693e-12	1.37043e-13	1.07878e-11	2.33624e-09
991	Frequency of strenuous sports in last 4 weeks	15042	-1.14978	0.0637472	0.0958028	0.0805259	0.0836489	0.175238	0.0625741	0.050153	0.0341204	0.0120173	0.0135999	0.23653	0.00050374	3.50195e-05	0.00129574	0.00518074	0.000886801	0.000118063	0.0077597	0.00623961	0.000189998	0.000643789	4.76294e-05
1001	Duration of strenuous sports	15042	-0.229431	0.252751	0.179145	0.253333	0.187955	0.0884729	0.248057	0.153769	0.0559533	0.067462	0.0728395	0.277487	0.398148	0.206826	0.323281	0.516875	0.410184	0.269839	0.59214	0.280973	0.256725	0.498273	0.420298
200	Date of consenting to join UK Biobank	502518	0	1	1	1	1	1	1	1	1	1	1	1	1	1	1	1	1	1	1	1	1	1	1
1011	Frequency of light DIY in last 4 weeks	114709	0.729698	3.4985e-11	1.35975e-11	2.58616e-09	1.50476e-12	7.37342e-12	2.46163e-11	6.23584e-11	8.78471e-09	1.46003e-10	1.36378e-12	2.91071e-13	4.1352e-40	2.06765e-32	1.3523e-41	3.10089e-48	2.6154e-39	4.13354e-40	5.4351e-38	8.16325e-29	4.27932e-39	3.24896e-41	1.31216e-34
1021	Duration of light DIY	114709	0.631076	2.43496e-08	6.55139e-09	3.68534e-07	4.62676e-10	1.45103e-09	2.40782e-08	1.40487e-08	3.70377e-06	1.65779e-07	3.18456e-09	1.47897e-09	1.26863e-33	1.58269e-27	2.16724e-35	4.51036e-42	5.89091e-31	6.33997e-33	2.66732e-32	5.56119e-25	1.05435e-33	1.34805e-34	1.00365e-29
1031	Frequency of friend/family visits	215945	1.18757	9.93012e-10	1.09503e-09	2.08157e-08	9.19137e-10	3.85935e-10	4.40532e-10	4.32295e-10	7.78659e-06	3.02782e-10	2.59598e-11	2.44864e-13	3.35903e-12	2.11826e-13	3.02807e-12	2.05785e-12	1.97706e-11	1.01942e-12	1.88649e-11	3.88499e-09	1.46559e-11	8.84729e-13	3.74722e-14
1050	Time spend outdoors in summer	201894	-0.200731	1.69828e-226	2.53029e-247	1.80124e-215	4.96993e-240	1.84276e-219	1.142e-225	3.64861e-207	1.5962e-115	4.54688e-239	4.11827e-258	5.89938e-298	6.00912e-125	3.86059e-135	9.76286e-121	3.00764e-145	1.05033e-129	1.02414e-136	1.58906e-101	7.45431e-79	1.60545e-108	1.05632e-129	8.20105e-152
1060	Time spent outdoors in winter	202130	-0.230027	2.79827e-162	6.02321e-172	5.09904e-143	1.69347e-170	2.31613e-176	9.47995e-164	4.75906e-140	1.62162e-82	2.95961e-170	2.49872e-190	5.39094e-260	1.00354e-163	4.27457e-184	2.42751e-155	5.9914e-163	4.70101e-198	8.6383e-168	8.30588e-145	2.08182e-76	3.15904e-154	1.60307e-174	1.39907e-230
1070	Time spent watching television (TV)	214033	-0.272506	8.01285e-181	9.73061e-175	5.52097e-216	1.81185e-200	3.14106e-178	1.76125e-186	2.37023e-189	7.51414e-112	4.62277e-179	6.00696e-202	9.24107e-239	2.17087e-241	2.95366e-233	3.81637e-301	1.31735e-266	6.28183e-219	3.63418e-292	1.44963e-254	1.31618e-201	6.47587e-269	8.19214e-270	2.61375e-242
1080	Time spent using computer	214370	0.157136	4.08765e-172	4.54641e-188	1.90588e-186	4.08257e-181	9.1878e-162	2.63811e-177	1.64073e-161	5.75601e-63	2.30792e-157	4.11356e-172	1.22168e-243	1.99056e-81	2.12563e-107	1.89536e-75	1.48294e-76	3.41281e-70	7.63601e-76	1.77696e-90	2.51013e-19	1.82532e-84	5.27201e-72	6.7986e-98
1090	Time spent driving	212622	0.16811	0.0716792	0.506697	0.708317	0.0310799	0.02134	0.0323555	0.248513	0.614309	0.205136	0.298594	0.00908345	2.84966e-92	1.37421e-124	4.94569e-86	3.19827e-91	5.1776e-82	1.59298e-87	1.35118e-100	6.66194e-44	2.17714e-86	1.97386e-90	2.15659e-86
1100	Drive faster than motorway speed limit	215945	3.19734	2.43237e-42	2.11264e-49	3.91647e-47	5.94168e-46	1.01623e-45	4.95886e-47	1.67811e-45	6.83144e-25	1.16449e-46	3.17509e-45	9.26045e-58	3.4476e-182	2.66423e-228	2.66263e-185	1.80907e-208	1.55278e-209	5.12287e-195	3.68912e-194	2.44797e-58	1.13911e-191	4.17528e-186	6.61191e-211
1110	Length of mobile phone use	215945	1.06607	2.95442e-25	8.83126e-25	3.76983e-24	2.01321e-26	1.53595e-25	1.27051e-26	4.59487e-27	3.86032e-17	5.36739e-25	8.15112e-29	3.8582e-34	9.22316e-41	5.36723e-46	4.6764e-38	1.30408e-46	8.61992e-39	2.01819e-37	2.31196e-43	1.86971e-20	3.05614e-41	7.4159e-41	2.13495e-40
1130	Hands-free device/speakerphone use with mobile phone in last 3 month	184030	1.59083	2.86804e-16	1.41825e-13	5.22311e-15	3.85016e-18	5.28753e-17	9.90401e-18	1.45365e-17	1.86417e-13	7.33635e-18	7.95077e-19	2.3131e-22	1.51883e-39	7.31872e-39	5.59547e-39	2.27501e-42	4.49926e-41	2.61019e-40	1.87748e-41	9.38972e-24	2.79e-41	8.84707e-40	5.3471e-43
1140	Difference in mobile phone use compared to two years previously	184030	1.0435	6.06701e-23	2.03603e-20	4.96374e-20	1.61803e-23	5.41557e-23	3.11817e-23	2.19793e-23	1.63972e-16	5.25585e-23	4.47933e-26	4.69328e-33	1.38601e-25	2.04517e-24	3.36644e-23	3.51564e-26	5.37913e-30	4.52098e-26	6.97493e-26	8.83895e-19	8.23218e-27	2.12758e-26	1.1243e-27
1160	Sleep duration	214538	0.0412646	1e-255	1e-255	1e-255	1e-255	1e-255	1e-255	1e-255	1.92875e-45	1e-255	1e-255	1e-255	5.15517e-07	2.89676e-10	1.88399e-07	2.54507e-08	2.3914e-06	3.30491e-07	7.76533e-10	0.0453077	1.35347e-08	6.55305e-07	1.43347e-08
1170	Getting up in morning	215945	-0.944684	1.74103e-11	5.89591e-15	1.72362e-13	1.99418e-12	1.74435e-12	3.63296e-13	1.6822e-12	0.00013062	3.27122e-13	2.037e-13	6.14799e-15	0.00738701	0.0031269	0.00481561	0.00463867	0.00316234	0.000743376	0.00565692	0.0035545	0.00508877	0.00519899	0.00244556
1180	Morning/evening person (chronotype)	215945	-0.46794	6.65655e-95	3.68865e-99	2.1454e-94	1.24092e-101	1.08864e-101	1.4733e-96	3.43714e-98	7.93227e-16	2.89925e-98	2.32964e-100	1.53121e-123	8.26468e-46	1.84347e-57	3.42302e-48	1.08193e-52	2.50992e-52	4.07718e-51	6.84911e-50	6.66278e-06	1.23779e-49	1.29798e-46	1.62693e-51
1190	Nap during day	215945	1.57989	0.00362127	0.000123554	0.00142078	0.00170116	0.0025348	0.00493024	0.00312804	0.00983429	0.00966878	0.0151798	0.0438059	0.000552354	6.1669e-06	0.000483649	8.19481e-05	5.96767e-05	0.000964932	0.000348649	0.0123456	0.000186972	0.000708562	0.000729189
1200	Sleeplessness / insomnia	215945	0.7054	0.158228	0.204756	0.171633	0.106546	0.11821	0.172711	0.116414	0.473674	0.149413	0.0716436	0.0229012	0.0793637	0.068107	0.0827265	0.0240332	0.0333828	0.0757812	0.193325	0.076486	0.05298	0.0863299	0.0572763
1210	Snoring	524902	0	1	1	1	1	1	1	1	1	1	1	1	1	1	1	1	1	1	1	1	1	1	1
1220	Daytime dozing / sleeping (narcolepsy)	215945	0.939124	2.07173e-05	1.28568e-06	5.9211e-06	6.24762e-06	1.40074e-05	5.14746e-05	9.52383e-06	2.08742e-06	3.89353e-06	6.06024e-06	2.81312e-10	3.80493e-08	6.16272e-09	1.82073e-07	5.89727e-09	3.0064e-09	8.6939e-08	1.5966e-07	3.73061e-09	1.3139e-07	3.34045e-07	5.9973e-11
1239	Current tobacco smoking	215945	1.65274	0.00120719	0.000401766	0.00370201	0.00409417	0.00709592	0.000812373	0.00274117	0.000243503	0.00168711	0.00225913	0.00104556	2.22417e-06	1.38313e-05	5.95574e-06	8.35916e-07	3.95135e-10	9.95644e-09	5.22143e-06	0.000264266	8.00973e-07	4.63834e-06	1.59917e-05
1249	Past tobacco smoking	201337	1.01437	1.34851e-06	1.11249e-05	2.72589e-05	6.79862e-07	1.00769e-06	1.23697e-07	5.19722e-07	1.61796e-06	1.29397e-06	1.4668e-07	6.40025e-11	7.1379e-13	1.02466e-11	3.71502e-12	1.78488e-14	8.60273e-15	6.23853e-14	2.72974e-12	5.71279e-10	2.68238e-13	1.83201e-13	2.08589e-13
1259	Smoking/smokers in household	201337	0.888905	0.257119	0.355983	0.477282	0.203642	0.155167	0.193766	0.0865673	0.625907	0.118198	0.197364	0.0122295	3.22822e-05	1.62393e-05	0.000126339	2.53904e-05	1.42102e-06	8.91464e-06	4.98499e-05	0.00329771	6.87601e-05	7.37622e-06	1.00288e-05
1289	Cooked vegetable intake	214352	0.0176988	0.0651385	3.38413e-09	0.523079	0.0925224	0.0833013	0.0208401	0.00847296	0.0327075	0.383636	0.00262817	0.970345	0.0313487	0.0029459	0.0344597	0.000614282	0.0047078	0.0162718	0.348869	2.52813e-07	0.601544	0.0289136	0.0006443
1299	Salad / raw vegetable intake	214002	0.0346582	2.08645e-08	1.41642e-18	1.64459e-07	4.80818e-09	1.59277e-08	1.06352e-10	1.48559e-05	0.120718	1.9993e-06	4.58334e-12	2.10206e-05	2.54414e-05	0.191559	8.96892e-07	3.0592e-07	0.00769058	1.30574e-05	1.31233e-08	5.1806e-17	0.000706606	4.36928e-05	0.00550638
1319	Dried fruit intake	213987	0.105557	2.10949e-10	0.0241594	9.28797e-11	1.08199e-12	3.14731e-10	8.26881e-11	6.17827e-10	6.28016e-17	9.20135e-12	4.16242e-12	1.05712e-20	1.27366e-37	4.41822e-14	1.83193e-47	8.57482e-32	2.41172e-38	6.09058e-48	1.37393e-39	1.94606e-57	3.23641e-36	1.3719e-45	3.30221e-42
1329	Oily fish intake	215945	1.17361	5.89332e-10	1.59337e-08	8.93834e-09	3.77183e-13	6.54157e-13	1.59345e-10	1.24736e-09	2.26535e-07	6.31447e-11	7.8464e-11	3.88984e-13	3.92406e-17	1.41879e-15	1.72396e-16	2.22973e-21	1.78251e-21	2.29777e-17	3.58336e-14	4.29206e-12	1.38337e-18	6.05756e-18	9.12969e-19
1339	Non-oily fish intake	215945	1.19299	6.60313e-12	1.56585e-11	1.29011e-11	2.7454e-12	5.25215e-13	6.05993e-13	1.69141e-11	1.88057e-07	4.1653e-14	2.61395e-12	3.87596e-17	1.59684e-14	1.09139e-15	1.13545e-13	1.00518e-16	5.12429e-18	3.26956e-14	6.39639e-15	7.83144e-08	1.44179e-14	9.62347e-15	6.32591e-16
1349	Processed meat intake	215945	2.08847	4.94128e-08	5.29756e-06	1.38672e-07	1.53915e-09	3.17952e-09	2.0968e-08	3.35084e-09	1.11808e-05	4.5893e-08	8.55763e-10	1.35658e-10	3.91722e-18	1.0072e-18	3.44177e-17	2.86766e-19	3.75568e-20	1.37334e-17	2.40603e-18	9.01283e-11	1.19617e-18	9.67438e-18	5.17911e-16
1359	Poultry intake	215945	2.30306	5.44376e-11	5.83484e-09	7.26134e-10	1.17721e-13	7.50847e-13	6.2938e-11	6.91041e-11	1.76781e-08	2.64204e-11	3.09679e-12	6.3128e-14	3.08223e-21	3.27381e-20	2.96647e-21	7.8587e-24	1.1798e-20	1.81116e-21	4.4415e-21	6.58869e-15	1.08098e-20	3.71834e-20	7.70361e-20
1369	Beef intake	215945	1.73798	8.22427e-15	5.89025e-13	1.65695e-15	2.37401e-15	2.23676e-18	4.50453e-15	1.25978e-15	2.84606e-09	1.29053e-15	7.44977e-17	1.81127e-21	1.03423e-28	8.90365e-26	4.3361e-28	2.02189e-29	6.50682e-32	2.70969e-28	2.29477e-30	3.95413e-19	4.05297e-28	4.40591e-30	1.27925e-27
1379	Lamb/mutton intake	215945	1.32544	2.97368e-21	3.42797e-19	2.6556e-20	2.22096e-21	7.07937e-25	1.40472e-21	8.00151e-21	1.23451e-15	1.23684e-22	1.53837e-24	5.89045e-27	2.23198e-27	2.09272e-24	1.23882e-26	4.69743e-29	1.65656e-30	7.39854e-27	8.25722e-28	2.24969e-16	2.15217e-27	1.07288e-28	7.88031e-31
1389	Pork intake	215945	1.11997	6.57938e-17	1.94169e-14	9.70317e-17	5.39139e-17	6.1135e-21	5.58472e-17	1.3084e-17	8.02197e-12	4.5812e-19	9.59838e-19	1.38572e-22	1.40751e-19	9.21091e-17	2.97692e-19	7.0066e-22	7.63012e-23	2.67657e-20	1.74331e-19	1.97155e-12	2.20968e-19	1.62913e-20	1.76219e-22
1408	Cheese intake	211083	1.54387	1.56376e-12	5.27654e-13	1.5332e-12	6.4745e-13	8.59461e-14	2.18945e-13	6.09308e-14	8.06862e-10	3.86075e-12	4.57281e-14	2.41065e-15	7.77188e-13	1.22558e-12	2.79765e-13	2.40123e-15	7.69565e-13	7.57134e-13	2.70347e-11	1.69061e-09	3.7321e-13	4.41058e-13	3.98395e-14
1418	Milk type used	215945	-0.699956	0.0162867	0.0153112	0.0305296	0.0154766	0.00957956	0.0193084	0.00851354	0.0351547	0.00455776	0.00561422	6.50644e-06	0.368533	0.383017	0.378274	0.530523	0.347677	0.146976	0.38464	0.221368	0.360363	0.386004	0.293238
1428	Spread type	215945	0.713682	0.00115979	0.0102724	0.00461863	0.000167294	0.000503038	0.00145521	0.000780879	0.00634913	0.000289888	0.00182534	5.29498e-05	0.0627222	0.0248782	0.118546	0.0130293	0.106254	0.119841	0.0108562	0.029852	0.0621618	0.0654994	0.0266669
1438	Bread intake	213753	-0.125092	5.92605e-32	5.89594e-34	1.0826e-21	8.26065e-34	9.46282e-33	1.54542e-32	8.02741e-35	1.2063e-18	3.00436e-37	2.02677e-22	8.52913e-71	3.69397e-52	8.26473e-81	2.11919e-44	4.94006e-46	4.0353e-35	1.10079e-57	1.12415e-47	2.35849e-43	1.95794e-62	1.74298e-39	4.6344e-74
1448	Bread type	206352	-0.568603	0.0383928	0.0922684	0.0330562	0.0178114	0.118623	0.0362489	0.0667376	0.124474	0.0137819	0.0545384	0.000173726	0.00339485	0.0788161	0.00176856	0.00145127	0.00312027	0.000362174	0.00475317	0.00716033	0.000396506	0.00372446	0.00235625
1458	Cereal intake	215536	0.0512239	0.270009	2.67317e-06	0.0207595	1.00259e-23	0.450467	0.0401018	0.36323	2.01686e-14	0.0553192	0.000122023	2.84637e-13	4.3742e-10	0.066763	5.8143e-12	3.80821e-46	1.77583e-14	4.11295e-18	8.32917e-14	1.51671e-25	0.117665	1.18108e-12	7.67634e-16
1468	Cereal type	182105	0.593465	0.000333263	0.00187573	0.000815467	4.13881e-05	0.000189743	0.000167675	8.02276e-05	0.000563085	7.79478e-05	0.000290785	0.000189409	6.93401e-06	0.000609232	2.82166e-06	2.05456e-06	6.72105e-06	9.04913e-07	1.60599e-06	2.61921e-05	9.90327e-07	5.70711e-06	8.29222e-06
1478	Salt added to food	215945	-0.988064	0.360395	0.13992	0.200942	0.348267	0.415499	0.418816	0.556027	0.592765	0.252483	0.557013	0.264434	0.271911	0.881247	0.259744	0.298868	0.633889	0.200429	0.255198	0.17981	0.397264	0.24555	0.431054
1488	Tea intake	215533	-0.0612612	2.64009e-23	1.39426e-27	6.27968e-18	4.43093e-08	2.49065e-28	1.5834e-21	7.92669e-30	1.75875e-05	1.46537e-25	1.69771e-23	2.26763e-36	8.40535e-14	3.96132e-15	5.47976e-14	2.78357e-13	6.39796e-12	1.98793e-15	0.0215448	2.03344e-05	1.67031e-25	9.99019e-15	1.39992e-16
1498	Coffee intake	215639	0.00876784	0.033776	0.000114367	4.45143e-07	0.171594	0.0929548	0.077367	2.6971e-05	0.516334	8.77712e-05	0.290937	0.161598	0.285356	0.116055	0.100977	0.0464507	0.615106	0.294964	0.964777	0.139448	0.000218094	0.221065	0.115214
1508	Coffee type	166807	0.775822	6.68161e-05	6.62099e-05	0.000282308	0.000115198	3.38221e-05	4.61529e-05	8.48425e-05	0.00032215	4.09071e-05	4.28079e-05	2.6235e-07	0.000141555	0.000381524	2.28382e-05	0.000270141	8.46043e-05	6.8378e-05	0.000414578	0.000164456	6.38527e-06	0.000233678	0.000182056
1518	Hot drink temperature	215945	-1.63185	3.16737e-109	2.57986e-123	2.42654e-114	3.65852e-120	4.60661e-117	1.65114e-113	3.23628e-113	3.31262e-09	1.38757e-118	6.00761e-116	4.3702e-136	1.49007e-88	5.89195e-107	1.77005e-88	5.27165e-102	4.94787e-100	3.50845e-90	2.47106e-97	1.91431e-19	2.36487e-94	2.17808e-90	2.83682e-98
1528	Water intake	214644	-0.00459053	2.03479e-21	3.74845e-29	2.79442e-27	6.59887e-11	1.55987e-18	2.85178e-22	3.35774e-18	2.02627e-41	1.18074e-18	2.54051e-27	3.76705e-09	0.576671	0.276049	0.53702	0.692876	0.249079	0.750766	0.585216	0.0106898	0.466663	0.782689	0.236017
1538	Major dietary changes in the last 5 years	215945	1.08897	3.70505e-05	0.000181113	6.30052e-05	8.80491e-05	2.964e-05	1.83891e-05	6.09602e-06	0.000947842	7.62294e-05	2.26676e-06	6.12621e-10	2.75505e-10	4.25048e-10	6.43649e-10	6.46717e-11	9.62974e-11	3.13605e-10	1.40721e-10	1.53675e-10	8.79762e-10	1.09692e-10	4.79111e-13
1548	Variation in diet	215945	1.44981	3.749e-06	0.000174102	1.17159e-05	2.88052e-07	3.02713e-07	1.36891e-06	2.67025e-06	0.00157458	7.88918e-07	1.39757e-07	2.27261e-11	9.25662e-14	6.52607e-11	4.63596e-12	1.2875e-16	2.14936e-15	3.13271e-14	4.5827e-15	1.98601e-11	1.51998e-13	4.83916e-15	2.51491e-15
1558	Alcohol intake frequency.	215945	1.12091	0.00224149	0.0228862	0.00113559	0.000740192	0.00143329	0.00407915	0.00068565	2.75641e-05	0.000649554	0.000500987	8.43867e-07	0.000627882	0.000103902	0.00159062	0.000178911	0.000546383	0.00147306	0.00176267	2.42863e-05	0.00194517	0.000978522	3.93487e-05
62	Willing to attempt cognitive tests	215944	-1.46797	3.53689e-60	5.15722e-61	3.46156e-59	8.24539e-67	4.10345e-69	5.28886e-65	7.64751e-62	6.93621e-28	5.53946e-60	6.24676e-64	1.61922e-78	3.24036e-82	2.7168e-85	3.33188e-78	3.14195e-87	3.75215e-93	1.23577e-87	7.58287e-84	3.973e-52	2.73344e-87	9.11388e-83	1.16971e-93
1568	Average weekly red wine intake	138964	0.0660988	6.87138e-67	7.03642e-67	3.55479e-71	5.29631e-54	9.93046e-100	5.3633e-68	3.04436e-52	2.6138e-20	1.85209e-76	1.02845e-57	1.72282e-90	2.81224e-11	2.32239e-14	1.88512e-15	1.29786e-09	1.07537e-20	2.69606e-12	1.36946e-05	0.521837	9.34045e-28	8.37229e-13	1.72519e-13
1578	Average weekly champagne plus white wine intake	138831	-0.00648913	5.33062e-18	4.76489e-31	2.45745e-17	6.76601e-13	1.41481e-22	4.93825e-20	2.41553e-14	0.000763067	1.47327e-18	1.92567e-13	4.01712e-20	0.513769	1.26429e-07	0.770606	0.383671	0.899308	0.629534	0.00185863	6.64283e-11	3.12049e-05	0.259253	0.975366
1588	Average weekly beer plus cider intake	139111	-0.16038	1.55689e-127	3.2757e-103	1.60542e-124	1.7558e-133	1.19477e-83	4.58798e-136	9.49525e-153	4.03154e-164	1.25166e-141	2.20195e-147	7.89016e-271	8.91353e-59	2.86069e-52	1.40256e-49	5.12497e-70	6.56327e-59	1.81598e-69	2.16362e-51	2.60347e-58	2.33701e-55	2.66162e-57	1.14513e-81
1598	Average weekly spirits intake	138669	-0.116134	2.02381e-14	2.92938e-13	4.68932e-18	1.16903e-20	4.75203e-10	1.4963e-10	6.17627e-21	4.80452e-36	2.5398e-14	1.89495e-18	4.22111e-23	1.45079e-31	1.22727e-18	3.18398e-33	9.77934e-47	7.77164e-32	1.89026e-39	3.69537e-30	2.76464e-51	5.98898e-25	1.39145e-34	3.59017e-37
1608	Average weekly fortified wine intake	139193	-0.047696	0.384395	0.712634	0.594147	0.168003	0.0865469	0.699378	0.113625	0.319674	0.363403	0.286783	0.241229	1.53387e-06	3.58977e-05	5.63075e-06	4.57281e-09	2.12184e-06	4.51777e-06	1.29896e-08	5.18368e-05	0.000345933	1.73261e-05	5.18859e-06
1618	Alcohol usually taken with meals	291356	0	1	1	1	1	1	1	1	1	1	1	1	1	1	1	1	1	1	1	1	1	1	1
1628	Alcohol intake versus 10 years previously	198504	0.813411	3.48347e-10	8.47714e-11	1.1722e-08	2.84813e-09	2.45214e-11	1.76418e-10	2.05961e-10	0.000242522	2.32684e-11	6.45117e-12	2.26079e-14	1.96888e-15	9.77054e-18	4.85256e-15	2.15782e-17	4.75874e-19	2.23129e-15	2.1083e-15	1.17007e-07	4.37437e-19	6.97182e-14	4.45371e-16
1647	Country of birth (UK/elsewhere)	215945	1.83527	0.382949	0.348541	0.393197	0.395296	0.594869	0.254321	0.461782	0.55896	0.162053	0.410413	0.285396	0.0411678	0.0160295	0.0645707	0.0109603	0.10264	0.075251	0.0636294	0.0279545	0.028547	0.0254289	0.0351371
1677	Breastfed as a baby	407514	0	1	1	1	1	1	1	1	1	1	1	1	1	1	1	1	1	1	1	1	1	1	1
1687	Comparative body size at age 10	215945	0.973855	2.08895e-24	2.67744e-22	1.83884e-22	1.11687e-25	7.32048e-28	1.00881e-26	2.82295e-26	1.89289e-27	1.13054e-23	1.21844e-26	6.24749e-35	2.38057e-41	3.12333e-47	1.38887e-39	5.6505e-45	3.62632e-48	1.61523e-39	4.95771e-41	4.74103e-47	4.95902e-40	7.86948e-44	1.4808e-45
1697	Comparative height size at age 10	215945	0.769371	3.35879e-06	0.000131931	0.000197369	6.2156e-07	6.16808e-07	7.84302e-08	9.01884e-06	7.70976e-06	2.30898e-05	1.80596e-51	8.30287e-09	1.5421e-32	1.27764e-36	9.1496e-30	3.64972e-35	6.4978e-37	1.24618e-29	1.36659e-33	1.00943e-37	7.25497e-31	8.81313e-101	1.35252e-34
100002	Energy	30099	-0.0530636	0.738536	0.298612	0.0294552	0.283526	0.704135	0.316161	0.982681	0.223535	0.705663	0.407232	0.421077	0.0132026	0.00031875	0.312295	0.669082	0.0200531	0.00934924	0.01692	0.0041328	0.126967	0.126533	0.0126407
100001	Food weight	30099	0.0159302	6.05367e-05	8.92622e-05	0.00748838	0.0134917	0.0127334	3.66346e-05	2.88166e-05	3.64322e-08	0.000123916	1.75987e-05	5.42009e-05	0.456899	0.120299	0.0934071	0.0120682	0.132356	0.769875	0.0533546	0.629773	0.512986	0.120509	0.218128
100004	Fat	30099	-0.058194	0.220722	0.043226	0.00268408	0.105396	0.816343	0.0315997	0.245982	0.811776	0.34956	0.0644223	0.0833736	0.0065699	0.00561175	0.135769	0.15614	0.000281014	0.00285337	0.0362362	0.000274721	0.241001	0.0549046	0.00267135
100005	Carbohydrate	30099	0.00329795	0.114876	0.193	0.00364109	0.0131538	0.177564	0.0405395	0.150275	0.127274	0.823315	0.0118045	0.0169629	0.877596	0.0185363	0.187825	0.404556	0.413171	0.814885	0.469041	0.403135	0.71937	0.320323	0.837002
100003	Protein	30099	-0.070771	0.216222	0.175323	0.0206936	0.00218385	0.285584	0.108649	0.417526	0.895372	0.601097	0.132288	0.0560779	0.000948454	1.22718e-10	0.00511246	0.00441291	0.00203325	0.000642906	6.2594e-05	0.00117798	0.000114389	0.00886735	0.000532619
100007	Polyunsaturated fat	30099	-0.0441253	0.489709	0.649873	0.811762	0.803325	0.194692	0.716176	0.623611	0.249493	0.392577	0.819597	0.242553	0.0393245	0.0261048	0.222614	0.246697	0.0187604	0.0181508	0.165076	0.0198105	0.0516322	0.0896141	0.00974107
100006	Saturated fat	30099	-0.0679354	0.208278	0.0172581	0.00188539	0.114993	0.763745	0.0169321	0.261427	0.889603	0.511337	0.061828	0.0361858	0.00150912	0.00250192	0.0302384	0.0258488	4.18418e-05	0.000686376	0.00854926	4.35011e-05	0.191278	0.0143296	0.000602063
100009	Englyst dietary fibre	30099	0.0815026	0.786036	0.124248	0.428447	0.195454	0.50176	0.85449	0.862063	0.0838422	0.993524	0.39811	0.26923	0.000140823	0.86943	3.55816e-06	4.98871e-07	8.76626e-07	6.13757e-05	1.1312e-05	3.68011e-07	0.00995088	5.08009e-06	0.000173254
100010	Portion size	30087	-0.304375	3.35251e-09	6.37396e-07	9.15402e-14	1.57604e-08	1.42088e-10	1.58196e-08	4.81002e-10	2.36835e-07	1.56881e-11	4.21686e-10	4.67012e-10	1.63207e-05	0.00828159	3.19974e-05	2.66652e-09	1.28247e-05	1.55803e-05	2.93804e-05	9.62154e-07	2.20671e-05	3.21039e-07	7.70769e-06
1707	Handedness (chirality/laterality)	215945	-0.66137	0.253065	0.141941	0.196238	0.351647	0.273738	0.20337	0.321385	0.392327	0.126502	0.111856	0.300993	0.321884	0.558739	0.322888	0.697174	0.252127	0.236004	0.200205	0.662462	0.273684	0.30736	0.315046
100012	Vitamin B6	30099	-0.0628374	0.00767957	0.00540584	0.082414	0.599272	0.0263508	0.00863291	0.00347328	0.0223557	0.000541108	0.02242	0.00696767	0.00333776	1.6933e-09	0.00755652	0.205526	0.0867867	0.00211662	0.00211437	0.0143159	0.000119801	0.0135701	0.00221466
100013	Vitamin B12	30099	0.000315146	0.54412	0.751115	0.249451	0.293825	0.865178	0.478485	0.884462	0.967332	0.260313	0.295757	0.127035	0.988257	0.00927824	0.78819	0.00580613	0.839494	0.968437	0.944996	0.590903	0.664967	0.808231	0.65022
100014	Folate	30099	0.0163871	0.135479	0.0178079	0.599333	0.689411	0.263422	0.143765	0.0367704	0.253179	0.0492201	0.262876	0.573685	0.444094	0.00932993	0.10262	0.00164571	0.103277	0.471436	0.207933	0.074292	0.919013	0.145705	0.578621
100015	Vitamin C	30099	0.029836	0.228393	0.271164	0.262999	0.0448517	0.0947346	0.327175	0.393989	0.200344	0.450543	0.141618	0.0176949	0.1635	0.668029	0.0743262	0.0062097	0.0283897	0.267984	0.134415	0.117713	0.12585	0.0778851	0.101978
100011	Iron	30099	0.0211012	0.731827	0.294774	0.387015	0.443606	0.87622	0.816049	0.405813	0.373989	0.73482	0.81504	0.224672	0.3244	0.14182	0.0243487	0.000186665	0.0708034	0.257532	0.601576	0.218211	0.19644	0.0651222	0.113548
100017	Magnesium	30099	0.0529163	0.417114	0.99995	0.0615975	0.0273487	0.197392	0.322989	0.725767	0.616298	0.436655	0.282422	0.0467997	0.0134594	0.277292	0.000107837	2.26605e-09	0.00359936	0.00492739	0.0151253	0.000670096	0.060215	0.000552706	0.00719086
100016	Potassium	30099	0.0187006	0.433772	0.580977	0.0943308	0.0579087	0.187257	0.343352	0.706749	0.358836	0.773284	0.305492	0.132455	0.382474	0.0543973	0.0830967	0.000533191	0.0848785	0.277541	0.363975	0.079466	0.683341	0.134972	0.311412
100019	Carotene	30099	0.0230093	0.21824	0.469062	0.28415	0.0651473	0.0577452	0.287725	0.421308	0.0487473	0.162846	0.334482	0.161256	0.282567	0.683875	0.189176	0.12845	0.0759393	0.215	0.331006	0.118021	0.713349	0.195168	0.240168
100020	Typical diet yesterday	458607	0	1	1	1	1	1	1	1	1	1	1	1	1	1	1	1	1	1	1	1	1	1	1
1717	Skin colour	215945	0.851444	2.88123e-16	5.19104e-16	1.63313e-14	9.71409e-15	8.71697e-16	4.41144e-17	1.17892e-15	8.27292e-14	9.29164e-19	2.24887e-18	1.64987e-25	1.38313e-23	5.51498e-24	9.77699e-22	4.87895e-24	2.26394e-26	2.91703e-22	3.34012e-22	1.03357e-19	1.16796e-26	8.26346e-23	2.22673e-24
100021	Vitamin D	30099	0.0149758	0.960332	0.772679	0.992414	0.954362	0.517462	0.934395	0.873343	0.698289	0.380863	0.658023	0.505413	0.484308	0.0851491	0.283096	0.00670848	0.799598	0.425283	0.448112	0.0933633	0.210024	0.355267	0.402204
100022	Alcohol	30099	-0.100297	2.56878e-06	0.00509219	9.55328e-05	3.68358e-08	0.0215223	1.30595e-06	5.79347e-08	6.07542e-14	0.000170059	3.34715e-09	6.30969e-09	2.80215e-06	0.816581	0.000303209	2.7467e-05	8.53597e-05	1.07762e-06	2.2338e-11	1.35031e-11	0.270437	4.5935e-06	3.17407e-05
68	Number of blood samples taken	215943	-0.193857	8.98878e-86	1.05987e-76	1.76414e-105	5.73194e-111	9.82351e-106	3.08076e-77	9.37318e-128	1.56152e-08	1.5933e-113	1.66523e-111	3.62067e-105	1.29161e-123	1.78938e-106	6.61167e-142	1.67037e-194	6.02689e-143	1.09291e-111	1.1844e-125	1.09675e-46	1.04077e-157	3.02701e-159	1.66256e-142
100025	Vitamin E	30099	0.0661021	0.0179232	0.0316862	0.00169802	0.0186814	0.0953519	0.00578627	0.0210959	0.0311653	0.0200526	0.00860559	0.000460786	0.00201993	0.156911	2.15603e-05	0.000379992	0.00307236	0.000340927	0.000196818	0.000513119	0.00294022	0.00016906	0.00070105
100026	Daily dietary data credible	3494	0	1	1	1	1	1	1	1	1	1	1	1	1	1	1	1	1	1	1	1	1	1	1
100024	Calcium	30099	-0.0123072	0.0594787	0.236882	0.00241124	0.000133216	0.149588	0.00830028	0.188521	0.0363019	0.605812	0.0184188	0.00498016	0.565452	0.000199878	0.74192	0.0101614	0.818397	0.752328	0.781991	0.908842	0.269934	0.977296	0.465391
100023	Starch	30099	-0.0172752	0.61754	0.714616	0.0938193	0.24363	0.688045	0.449146	0.423267	0.322348	0.524032	0.12884	0.531864	0.419796	0.00730573	0.92369	0.506706	0.917343	0.213766	0.505435	0.76756	0.15966	0.989766	0.28451
1727	Ease of skin tanning	215945	0.7766	8.67859e-17	1.38778e-17	2.4214e-16	2.7085e-18	4.31232e-18	3.09346e-18	4.1104e-18	1.9473e-17	2.31238e-17	3.85852e-16	2.78044e-21	1.81043e-40	5.62567e-47	1.38527e-38	2.12323e-45	5.84967e-46	1.14522e-38	2.31227e-42	7.94948e-45	1.12887e-40	3.26065e-21	2.92194e-44
1737	Childhood sunburn occasions	164019	0.129243	6.50502e-44	1.79898e-34	1.94638e-48	4.62996e-42	6.00609e-46	4.85263e-42	5.92454e-46	3.80968e-25	6.47854e-45	2.92429e-38	5.35997e-63	7.56556e-43	5.91178e-31	5.60732e-45	5.18043e-45	7.45216e-38	1.29025e-44	5.33918e-45	2.64581e-21	1.2703e-46	5.46459e-39	9.68358e-54
1747	Hair colour (natural, before greying)	215945	1.05205	9.92482e-16	1.73968e-14	6.67075e-14	4.35887e-16	3.87106e-16	2.86196e-17	1.55251e-15	3.13174e-13	1.11606e-16	3.52535e-14	1.10729e-21	0.00103744	0.00923527	0.000724655	0.000342691	0.000310501	0.00186314	0.000734272	0.000275981	0.00112585	0.00157357	0.000745754
1757	Facial ageing	215945	0.665209	1e-255	1e-255	1e-255	1e-255	1e-255	1e-255	1e-255	1e-255	1e-255	1e-255	1.53875e-82	1.08553e-109	1.6312e-122	2.33457e-103	3.70232e-123	4.52225e-128	1.12159e-105	1.15592e-110	4.11783e-119	1.79702e-108	7.08758e-100	1.06571e-31
1767	Adopted as a child	564000	0	1	1	1	1	1	1	1	1	1	1	1	1	1	1	1	1	1	1	1	1	1	1
1777	Part of a multiple birth	524902	0	1	1	1	1	1	1	1	1	1	1	1	1	1	1	1	1	1	1	1	1	1	1
1787	Maternal smoking around birth	460751	0	1	1	1	1	1	1	1	1	1	1	1	1	1	1	1	1	1	1	1	1	1	1
1797	Father still alive	550486	0	1	1	1	1	1	1	1	1	1	1	1	1	1	1	1	1	1	1	1	1	1	1
1807	Father's age at death	158688	0.132615	2.70083e-31	2.15835e-33	1.76956e-39	1.58484e-30	3.31065e-17	3.16473e-31	5.28858e-29	4.22826e-34	3.23648e-36	2.93971e-33	2.25348e-47	4.25512e-43	3.74279e-46	2.44341e-47	3.60331e-42	2.24234e-28	1.7696e-48	9.30298e-44	1.39861e-46	1.25601e-49	4.14548e-45	2.3188e-50
1835	Mother still alive	555987	0	1	1	1	1	1	1	1	1	1	1	1	1	1	1	1	1	1	1	1	1	1	1
1845	Mother's age	85807	0.149127	1.38377e-21	2.58675e-21	1.03362e-22	1.98523e-17	5.88319e-16	5.11721e-21	1.06588e-18	1.20528e-14	7.7924e-21	1.0797e-20	2.10137e-26	1.89466e-32	4.22054e-28	7.25941e-32	1.96615e-32	7.47667e-28	1.47153e-38	1.87671e-30	1.40276e-25	2.40533e-37	4.16409e-34	1.62429e-37
100150	Drinking water intake	25970	0.130959	0.00701994	0.00498531	0.00130841	0.0108508	0.0100487	0.00411738	0.00693339	2.24317e-05	0.0214122	0.00364492	0.18834	0.104459	0.0624753	0.0916398	0.141412	0.166493	0.189306	0.0861066	0.0758994	0.160755	0.101776	0.0545531
100160	Low calorie drink intake	4317	-0.55142	0.0822942	0.109315	0.0646586	0.0880017	0.0290603	0.0534382	0.109445	0.14563	0.0679261	0.0446697	0.0376669	0.0122883	0.0282741	0.0141012	0.0207361	0.00426076	0.00986554	0.0372947	0.00978338	0.015103	0.00618917	0.01253
100170	Fizzy drink intake	2170	-1.1819	0.199773	0.113417	0.264275	0.179375	0.158138	0.234344	0.118252	0.214119	0.122236	0.155908	0.136339	0.110978	0.113561	0.13763	0.488527	0.244306	0.0804586	0.0790119	0.0172363	0.178803	0.0869028	0.157213
74	Fasting time	215938	-0.104305	0.3581	0.133462	0.757309	0.0304787	0.798916	0.76694	0.600487	0.000430095	0.320437	0.977046	0.000426741	4.76418e-37	2.00522e-30	4.33417e-34	1.77103e-60	8.88225e-54	1.72346e-46	3.38999e-43	4.73087e-20	2.49145e-34	1.08904e-39	1.85691e-42
1873	Number of full brothers	212751	-0.125204	2.22168e-40	1.78091e-37	3.62751e-36	1.24461e-42	1.42597e-46	6.5764e-43	2.55085e-41	1.60946e-11	9.6371e-42	3.13079e-54	9.24971e-73	5.80537e-52	7.45556e-51	6.53914e-50	1.70364e-52	8.43305e-70	1.18899e-55	4.28254e-53	5.50369e-24	1.55602e-60	1.16856e-69	4.80882e-56
100180	Squash intake	3595	-0.434324	0.00810242	0.0104423	0.0169925	0.00473849	0.0103748	0.00836528	0.00856994	0.00113018	0.0719117	0.00962566	0.0406212	0.281962	0.260934	0.214193	0.0702876	0.262957	0.299535	0.265803	0.172972	0.244683	0.183168	0.252224
1883	Number of full sisters	212782	-0.117394	1.85844e-24	1.14729e-23	1.16403e-21	2.39225e-26	3.39782e-26	3.56734e-27	3.67403e-25	4.67909e-05	9.9823e-27	2.63971e-38	1.43483e-49	6.62838e-46	5.92457e-31	1.2667e-43	2.09446e-54	1.37636e-65	2.87469e-49	2.79668e-47	8.23974e-22	1.63482e-52	4.50645e-65	3.08037e-47
100190	Orange juice intake	7259	0.165208	0.026089	0.0819612	0.0513967	0.0112848	0.0150221	0.0503416	0.0112706	0.025689	0.00998801	0.073309	0.163342	0.0854983	0.286617	0.0743329	0.0555448	0.0427985	0.0412293	0.0224598	0.0710521	0.0434206	0.0773189	0.0586252
100200	Grapefruit juice intake	832	0.413808	0.119337	0.266198	0.186868	0.0648501	0.148252	0.0843206	0.0699546	0.207595	0.0656218	0.181701	0.0477058	0.1244	0.0323864	0.0768083	0.103247	0.0335488	0.125263	0.0936956	0.0774378	0.115959	0.143124	0.140995
100210	Pure fruit/vegetable juice intake	3768	-2.19249	0.06339	0.0394727	0.0508428	0.10243	0.0886205	0.0960529	0.108519	0.258389	0.0785392	0.0154865	0.0529314	0.132932	0.119033	0.152436	0.204202	0.0600621	0.0922042	0.2589	0.00135776	0.0863482	0.220773	0.0921528
100220	Fruit smoothie intake	852	0.879308	0.0688037	0.0509356	0.0762166	0.0302321	0.0693136	0.0383778	0.0453901	0.113434	0.105802	0.107081	0.0885871	0.00300034	0.00430454	0.00347807	0.0172461	0.0029732	0.00324811	0.000487638	0.00316428	0.00968216	0.00260869	0.0125739
1920	Mood swings	551010	0	1	1	1	1	1	1	1	1	1	1	1	1	1	1	1	1	1	1	1	1	1	1
100230	Dairy smoothie intake	1256	-2.84411	0.0868766	0.0452652	0.160773	0.0592926	0.0888716	0.109293	0.0981775	0.261771	0.0654346	0.113716	0.15672	0.0129481	0.00495214	0.0157674	0.0257532	0.0451758	0.00770203	0.0173916	0.0634751	0.0394979	0.0139958	0.00588116
1930	Miserableness	555287	0	1	1	1	1	1	1	1	1	1	1	1	1	1	1	1	1	1	1	1	1	1	1
100240	Coffee consumed	458607	0	1	1	1	1	1	1	1	1	1	1	1	1	1	1	1	1	1	1	1	1	1	1
1940	Irritability	539289	0	1	1	1	1	1	1	1	1	1	1	1	1	1	1	1	1	1	1	1	1	1	1
77	Heel bone ultrasound T-score, manual entry	19598	0.120556	2.39896e-10	3.50222e-09	8.93722e-09	2.18143e-12	4.14381e-14	2.25219e-10	1.22316e-11	2.74359e-12	2.4949e-07	2.09216e-10	8.99908e-10	1.60042e-05	1.3385e-05	5.41879e-05	7.55107e-05	1.08688e-08	4.25092e-05	0.000270119	4.8701e-05	2.57092e-05	0.000318836	0.00564034
100250	Instant coffee intake	14887	0.145779	0.205735	0.0640422	0.0512275	0.160663	0.198524	0.146136	0.118693	0.00953978	0.1096	0.106124	0.14294	0.0611525	0.0769204	0.0669116	0.00390984	0.110976	0.0803221	0.0556578	0.0879534	0.0792432	0.0481793	0.0524418
1950	Sensitivity / hurt feelings	548318	0	1	1	1	1	1	1	1	1	1	1	1	1	1	1	1	1	1	1	1	1	1	1
100260	Added milk to instant coffee	12459	0.078541	0.955547	0.849168	0.892125	0.867461	0.524563	0.993618	0.969497	0.33681	0.687316	0.771846	0.775499	0.814605	0.502181	0.741046	0.681884	0.652966	0.954224	0.558479	0.809495	0.860668	0.880553	0.738461
1960	Fed-up feelings	552766	0	1	1	1	1	1	1	1	1	1	1	1	1	1	1	1	1	1	1	1	1	1	1
100270	Filtered coffee intake	5460	0.18721	0.00843916	0.00442202	0.00515057	0.0252281	0.0152986	0.0138871	0.0121206	0.0520406	0.00174148	0.0236051	0.0704436	0.0904812	0.0219379	0.144323	0.11215	0.047333	0.134223	0.135015	0.331249	0.0133245	0.0821779	0.0408803
78	Heel bone mineral density (BMD) T-score, automated	125887	0.0815199	2.1187e-34	1.09638e-25	5.29124e-28	7.04101e-38	1.20891e-37	9.22723e-36	4.26534e-46	2.21203e-47	4.95524e-18	1.71814e-34	7.36874e-46	1.8006e-14	0.0613626	1.7925e-08	3.11175e-24	2.43123e-27	6.40494e-14	1.50388e-06	7.32208e-14	2.16539e-13	2.3343e-09	1.35775e-13
1970	Nervous feelings	550225	0	1	1	1	1	1	1	1	1	1	1	1	1	1	1	1	1	1	1	1	1	1	1
100280	Added milk to filtered coffee	3832	0.178103	0.862336	0.548587	0.756308	0.759548	0.537571	0.870764	0.750164	0.898632	0.515125	0.929482	0.796157	0.754007	0.765367	0.827711	0.838132	0.689762	0.482251	0.766454	0.253619	0.895451	0.888682	0.8998
1980	Worrier / anxious feelings	550002	0	1	1	1	1	1	1	1	1	1	1	1	1	1	1	1	1	1	1	1	1	1	1
100290	Cappuccino intake	1842	-1.56608	0.321227	0.189291	0.223578	0.283486	0.302273	0.284527	0.266103	0.399358	0.368696	0.179725	0.328688	0.0240954	0.055559	0.0187884	0.0431825	0.0407598	0.0153144	0.0260808	0.00912971	0.0641918	0.014913	0.0619768
1990	Tense / 'highly strung'	545150	0	1	1	1	1	1	1	1	1	1	1	1	1	1	1	1	1	1	1	1	1	1	1
396	Number of columns displayed in round	215945	0	1	1	1	1	1	1	1	1	1	1	1	1	1	1	1	1	1	1	1	1	1	1
100300	Latte intake	1564	-0.843185	0.343682	0.140138	0.608632	0.175641	0.269013	0.39812	0.293406	0.598999	0.109717	0.372476	0.515205	0.120025	0.125603	0.0618489	0.116003	0.210588	0.146761	0.0831002	0.129884	0.0496081	0.0761105	0.111529
397	Number of rows displayed in round	215945	0	1	1	1	1	1	1	1	1	1	1	1	1	1	1	1	1	1	1	1	1	1	1
2000	Worry too long after embarrassment	541510	0	1	1	1	1	1	1	1	1	1	1	1	1	1	1	1	1	1	1	1	1	1	1
398	Number of correct matches in round	215945	0.201878	1.42674e-95	9.85289e-108	2.50047e-98	1.19319e-105	6.72058e-106	2.78447e-102	6.62155e-100	2.74064e-25	7.2883e-99	2.25958e-99	2.94791e-120	6.6532e-134	2.24678e-158	3.38795e-131	3.37267e-148	1.17828e-152	4.646e-138	5.27189e-139	1.40263e-47	4.43894e-137	1.90852e-133	5.04302e-153
100310	Espresso intake	364	-1.85728	0.117677	0.0528898	0.111775	0.0789025	0.143868	0.126313	0.100467	0.0910632	0.161183	0.1074	0.199556	0.0854648	0.136294	0.0491929	0.0392277	0.0755899	0.0791795	0.0571925	0.0721697	0.0810088	0.112937	0.0343103
399	Number of incorrect matches in round	215945	-0.259604	5.36787e-151	5.76954e-180	5.73195e-160	2.12369e-159	1.72205e-165	1.05842e-153	1.64208e-160	2.6484e-37	3.09693e-158	8.53479e-154	3.17841e-178	2.73118e-220	9.92911e-257	4.26306e-218	4.20837e-243	2.70494e-257	4.37639e-228	2.26217e-244	6.10608e-31	4.36466e-227	1.00474e-224	2.84621e-248
2010	Suffer from 'nerves'	543919	0	1	1	1	1	1	1	1	1	1	1	1	1	1	1	1	1	1	1	1	1	1	1
100320	Added milk to espresso	114	0.451203	0.509103	0.660344	0.672439	0.429662	0.304036	0.506768	0.461518	0.687958	0.614533	0.433601	0.722257	0.769521	0.656527	0.735657	0.900052	0.472911	0.975222	0.748524	0.594737	0.707369	0.888619	0.938161
2020	Loneliness, isolation	555798	0	1	1	1	1	1	1	1	1	1	1	1	1	1	1	1	1	1	1	1	1	1	1
100330	Other coffee type	289	-3.40514	0.0653619	0.0591734	0.106056	0.0226946	0.117382	0.0538697	0.0719143	0.0558438	0.0807172	0.121418	0.0716612	0.00765739	0.000753949	0.00631459	0.0346633	0.0253028	0.00624061	0.00522644	0.00358224	0.00391305	0.00334707	0.00711087
403	Number of times snap-button pressed	215425	-0.0235946	0.0445926	0.386048	0.0451747	0.0144538	0.0191414	0.0777163	0.050524	0.0372232	0.108478	0.0420527	0.0062228	0.00404541	0.0450994	0.00397666	0.00167628	0.000967048	0.00426679	0.0140867	0.00162319	0.00481492	0.00810558	0.000425588
2030	Guilty feelings	549721	0	1	1	1	1	1	1	1	1	1	1	1	1	1	1	1	1	1	1	1	1	1	1
3	Verbal interview duration	215938	-0.392836	1e-255	1e-255	1e-255	1e-255	1e-255	1e-255	1e-255	1e-255	1e-255	1e-255	3.20038e-193	1e-255	1e-255	1e-255	1e-255	1e-255	1e-255	1e-255	1e-255	1e-255	1e-255	2.34677e-106
404	Duration to first press of snap-button in each round	214733	-0.873715	1e-255	1e-255	1e-255	1e-255	1e-255	1e-255	1e-255	1.65493e-128	1e-255	1e-255	1e-255	1e-255	1e-255	1e-255	1e-255	1e-255	1e-255	1e-255	4.24512e-176	1e-255	1e-255	1e-255
2040	Risk taking	543838	0	1	1	1	1	1	1	1	1	1	1	1	1	1	1	1	1	1	1	1	1	1	1
100350	Added milk to other coffee type	181	1.92259	1	1	1	1	1	1	1	1	1	1	1	0.510573	0.790589	0.532365	0.397927	0.446562	0.631221	0.561263	0.405538	0.729608	0.450728	0.778894
2050	Frequency of depressed mood in last 2 weeks	215945	0.759763	7.90053e-31	3.37566e-29	4.22357e-27	2.63537e-33	2.33902e-34	3.52774e-28	5.02249e-33	3.53196e-12	1.36985e-29	7.89535e-28	7.54003e-40	7.14764e-66	1.87754e-74	1.04976e-56	7.2217e-71	6.77839e-75	4.3562e-60	3.06766e-61	1.25476e-19	8.02137e-61	1.00585e-60	5.88743e-73
100360	Decaffeinated coffee	5037	0.511226	0.000867262	0.000583542	0.000536905	0.00466716	0.00357049	0.00128517	0.000768434	0.0493144	0.000474869	0.000407503	9.59278e-05	4.23644e-05	0.000376119	3.50507e-05	8.5693e-05	5.28593e-05	8.9154e-05	6.34886e-05	0.000847907	6.32267e-06	2.5086e-05	1.38393e-05
2060	Frequency of unenthusiasm / disinterest in last 2 weeks	215945	0.615602	3.27046e-27	2.66926e-32	2.91469e-30	1.86836e-29	1.97987e-28	2.49652e-28	1.52907e-26	3.5156e-12	1.6474e-29	1.19668e-26	4.37665e-27	8.92558e-33	3.46087e-35	2.07097e-26	3.21184e-34	4.53013e-37	1.21764e-27	2.60454e-28	1.04002e-17	3.27125e-28	4.33053e-30	1.35426e-35
100370	Intake of sugar added to coffee	3255	-0.643504	0.338519	0.186564	0.399057	0.0993632	0.404323	0.298427	0.246908	0.230734	0.390482	0.583305	0.208664	0.314395	0.302675	0.298117	0.243376	0.143116	0.0718712	0.414062	0.214273	0.371732	0.243098	0.171017
2070	Frequency of tenseness / restlessness in last 2 weeks	215945	0.882801	6.26177e-42	7.6259e-44	2.32189e-41	5.82807e-46	3.22407e-44	5.08311e-46	5.23013e-47	4.10605e-21	1.25673e-46	4.77632e-47	7.70348e-55	2.04629e-82	2.51212e-92	9.75463e-73	4.39441e-89	5.69766e-95	5.63245e-74	7.82383e-78	2.49401e-26	1.42724e-76	1.15055e-80	3.5769e-91
100380	Intake of artificial sweetener added to coffee	2115	-0.24737	0.013495	0.0074313	0.0223779	0.0279244	0.0196059	0.0170916	0.0148823	0.0394708	0.0273614	0.0126617	0.006978	0.446192	0.40362	0.335541	0.350883	0.496099	0.5046	0.279045	0.616259	0.383261	0.325829	0.488632
2080	Frequency of tiredness / lethargy in last 2 weeks	215945	1.56607	2.19581e-49	1.4395e-50	2.62412e-47	4.58112e-54	3.38162e-55	1.73586e-53	5.36595e-52	3.98357e-23	9.44307e-52	6.27125e-49	7.03402e-60	5.12769e-164	2.95461e-194	9.72158e-160	8.2167e-184	5.41678e-192	1.98114e-160	4.98158e-170	1.01194e-13	5.96569e-165	2.02168e-174	1.09011e-185
100400	Standard tea intake	21172	-0.149595	0.289867	0.281768	0.184066	0.0828717	0.122917	0.275633	0.324283	0.30717	0.337589	0.269629	0.0727221	0.134611	0.107289	0.0811831	0.0698682	0.162523	0.104964	0.372756	0.376247	0.036859	0.13654	0.0715735
100410	Rooibos tea intake	1372	-0.401668	0.0183125	0.0151872	0.00697955	0.0149482	0.0237031	0.0451453	0.0119528	0.0775047	0.023045	0.00924739	0.0827121	0.197416	0.446632	0.120771	0.119431	0.110357	0.149867	0.192713	0.105472	0.126519	0.205996	0.245042
2110	Able to confide	215945	1.10168	2.91169e-53	1.67084e-53	6.82973e-50	1.18804e-56	3.85225e-60	1.27448e-51	9.76438e-55	1.2608e-13	7.63981e-53	8.34643e-53	3.48851e-66	1.67389e-83	1.02076e-96	8.06219e-81	1.63537e-93	7.72943e-97	5.23781e-80	7.03687e-83	1.21584e-18	1.17849e-82	4.28053e-78	6.63177e-94
100420	Green tea intake	1779	0.393016	0.593964	0.422079	0.623093	0.416723	0.45643	0.602934	0.594426	0.426646	0.453583	0.484533	0.214726	0.403601	0.112045	0.375093	0.315622	0.458045	0.517936	0.262602	0.491576	0.49226	0.420055	0.378282
100430	Herbal tea intake	3512	1.11385	0.223106	0.167741	0.133041	0.180515	0.301284	0.261706	0.148893	0.270589	0.235221	0.163926	0.0580976	0.0262395	0.0167829	0.022325	0.0757095	0.0580994	0.0487309	0.0637245	0.00766287	0.0371677	0.0302296	0.0548598
2129	Answered sexual history questions	215945	-0.877508	1.14458e-163	3.0236e-163	8.77691e-178	1.2956e-171	1.45133e-158	9.14327e-168	2.12469e-168	3.63916e-94	1.00021e-150	6.16717e-165	1.31542e-201	3.51296e-205	4.32712e-207	5.22968e-211	9.13188e-203	1.48302e-198	7.77519e-219	1.28596e-221	2.3163e-104	7.83652e-218	1.72911e-204	4.11153e-215
100440	Other tea intake	1006	-0.448488	0.0904404	0.171365	0.0951315	0.0117913	0.273941	0.0612389	0.13001	0.088654	0.0604412	0.0517948	0.0470565	0.192864	0.196895	0.131919	0.131026	0.126352	0.130251	0.14492	0.251689	0.209519	0.233286	0.234654
2139	Age first had sexual intercourse	191049	0.0925688	1.41532e-38	1.62947e-35	3.74776e-38	5.12479e-45	3.31788e-37	9.40368e-42	2.00605e-33	5.39124e-42	6.47197e-36	2.16683e-49	3.32613e-63	7.52847e-27	1.41895e-16	1.53535e-24	2.93784e-36	1.03411e-39	4.61719e-34	1.35287e-20	2.03521e-29	1.42385e-27	2.80669e-28	2.47597e-33
2149	Lifetime number of sexual partners	178181	0.0702235	0.316492	0.0939993	0.264453	0.096334	0.876485	0.406207	0.304491	0.26281	0.885579	0.52878	0.0908509	3.57821e-15	3.11678e-21	2.29143e-18	4.8757e-17	2.46234e-10	3.33153e-14	3.29172e-16	2.80989e-05	9.20169e-17	2.6595e-14	1.40818e-16
100460	Added milk to standard tea	19405	-0.28836	0.0558854	0.0685774	0.028386	0.108985	0.0335678	0.0485905	0.0654235	0.0701079	0.0319049	0.121603	0.241167	0.402756	0.77258	0.435037	0.403402	0.398095	0.520352	0.262027	0.218168	0.485318	0.405275	0.239133
2159	Ever had same-sex intercourse	506462	0	1	1	1	1	1	1	1	1	1	1	1	1	1	1	1	1	1	1	1	1	1	1
100470	Decaffeinated tea	1988	0.275543	0.0383749	0.0310662	0.0256412	0.0388061	0.0125533	0.0249868	0.0417396	0.282955	0.139594	0.0498514	0.0346385	0.212682	0.589448	0.18103	0.256436	0.216856	0.14256	0.31213	0.327998	0.336674	0.256986	0.162209
100480	Added milk to rooibos tea	728	-2.02847	0.66449	0.923985	0.606257	0.53934	0.64242	0.685019	0.734169	0.691015	0.527158	0.742546	0.528	0.0081003	0.00339642	0.00754911	0.00285335	0.0327949	0.00268012	0.0135384	0.0141013	0.01228	0.00563334	0.054335
2178	Overall health rating	215945	1.17435	0.00747237	0.00532415	0.002328	0.0168213	0.00803535	0.00608701	0.0028311	0.00978934	0.00597311	0.00328077	9.55506e-26	1.39759e-15	2.16589e-14	8.38899e-16	2.60415e-17	2.48333e-13	3.70647e-16	9.23689e-17	6.02658e-23	4.8353e-16	9.81044e-17	4.75974e-15
100490	Intake of sugar added to tea	2326	-0.705166	0.110148	0.133307	0.0793817	0.0947335	0.167365	0.124471	0.114579	0.0968658	0.0502501	0.160335	0.0679441	0.00404155	0.0580131	0.00580438	0.00863457	0.000675354	0.00172513	0.0101482	0.0032551	0.00684877	0.00457104	0.000378861
2188	Long-standing illness, disability or infirmity	552079	0	1	1	1	1	1	1	1	1	1	1	1	1	1	1	1	1	1	1	1	1	1	1
87	Non-cancer illness year/age first occurred	159453	0.172339	6.16221e-107	2.15618e-116	1.23086e-110	3.89555e-120	0.0111697	2.87631e-113	2.93428e-95	2.74763e-116	3.18509e-115	9.04295e-111	1e-255	4.71864e-70	9.85277e-86	2.15386e-68	6.65597e-76	0.976872	3.84879e-70	1.3682e-56	7.28872e-67	1.10731e-72	2.21989e-70	6.44208e-250
100500	Intake of artificial sweetener added to tea	1796	0.841403	0.0718096	0.0707232	0.0507351	0.162038	0.105752	0.11431	0.0979539	0.155074	0.0789065	0.0754108	0.0473577	0.0884913	0.160286	0.114768	0.0742763	0.115524	0.124022	0.0432095	0.0850461	0.152317	0.109576	0.12379
100510	Other non-alcoholic drinks	458607	0	1	1	1	1	1	1	1	1	1	1	1	1	1	1	1	1	1	1	1	1	1	1
2207	Wears glasses or contact lenses	564868	0	1	1	1	1	1	1	1	1	1	1	1	1	1	1	1	1	1	1	1	1	1	1
100520	Milk intake	1136	-7.10906	0.00514232	0.0384765	0.00773777	0.0026455	0.00568757	0.00834519	0.0102322	0.00112082	0.00434283	0.00200837	0.0343291	0.0620912	0.0257414	0.0590587	0.00687013	0.0766803	0.108198	0.0273608	0.0242865	0.0918839	0.0819696	0.0682979
2217	Age started wearing glasses or contact lenses	188160	0.0211913	2.06772e-08	5.70855e-12	7.3581e-08	8.46554e-10	1.7362e-09	6.92954e-09	4.93564e-06	0.798569	3.37678e-08	2.43605e-10	4.81207e-21	0.0159473	0.0127371	0.011363	0.0323121	0.385726	0.0846009	0.00224471	1.20375e-11	0.00289391	0.00438931	0.744948
100530	Flavoured milk intake	685	-0.156515	0.091917	0.0837233	0.160619	0.248581	0.0365734	0.211199	0.0913878	0.0757904	0.0609892	0.135579	0.0306031	0.598446	0.471251	0.566635	0.672129	0.905733	0.599274	0.752593	0.284567	0.545375	0.522683	0.591882
2227	Other eye problems	563811	0	1	1	1	1	1	1	1	1	1	1	1	1	1	1	1	1	1	1	1	1	1	1
100540	Low calorie hot chocolate intake	584	-7.71747	0.0618877	0.115276	0.0550295	0.131364	0.147269	0.0703393	0.0757182	0.0996777	0.0616417	0.0338224	0.131034	0.0487893	0.0643694	0.0457953	0.0135582	0.0629818	0.0675838	0.197666	0.0237902	0.0319454	0.0423688	0.0224104
2237	Plays computer games	215945	2.26853	6.72506e-09	1.03882e-06	2.63235e-08	1.01008e-08	1.02084e-08	8.93088e-09	5.30195e-10	1.9328e-06	1.87707e-09	3.43373e-10	2.80558e-12	2.94592e-08	7.83347e-08	3.95469e-07	5.84272e-07	9.18025e-10	2.85448e-08	8.12962e-09	3.1556e-07	2.99984e-08	1.61994e-08	6.74978e-10
100550	Hot chocolate intake	1489	-7.12323	0.272152	0.245854	0.388432	0.243938	0.196504	0.256914	0.269566	0.387411	0.227117	0.341216	0.17898	0.00847925	0.0336156	0.0118331	0.00411753	0.00246172	0.00426086	0.0135051	0.0393603	0.0090379	0.00806986	0.0155772
2247	Hearing difficulty/problems	537925	0	1	1	1	1	1	1	1	1	1	1	1	1	1	1	1	1	1	1	1	1	1	1
100560	Other drink intake	646	1.79712	0.185556	0.313439	0.285742	0.178954	0.083316	0.221834	0.171456	0.169249	0.280698	0.141928	0.134295	0.213174	0.148159	0.1816	0.128216	0.301684	0.12229	0.205663	0.177433	0.422905	0.189288	0.377095
2257	Hearing difficulty/problems with background noise	553367	0	1	1	1	1	1	1	1	1	1	1	1	1	1	1	1	1	1	1	1	1	1	1
2267	Use of sun/uv protection	215945	3.04907	0.0363867	0.0909745	0.0406534	0.0160628	0.047648	0.0203101	0.0280524	0.00574359	0.024701	0.00135689	0.000245141	1.11367e-07	4.61833e-07	6.45366e-08	8.13431e-07	1.64311e-07	3.2607e-07	2.86681e-07	2.30805e-08	6.73221e-08	4.54227e-08	1.98819e-10
100580	Alcohol consumed	458607	0	1	1	1	1	1	1	1	1	1	1	1	1	1	1	1	1	1	1	1	1	1	1
2277	Frequency of solarium/sunlamp use	214476	-0.0219721	6.36606e-06	5.42203e-05	1.77937e-07	7.57719e-06	2.26307e-05	1.43102e-05	0.10225	2.26186e-06	8.2602e-08	3.69878e-06	1.98579e-07	0.0075467	0.192865	0.004475	4.31603e-05	0.170058	0.00154617	0.0458562	6.7037e-06	0.154575	0.00933559	1.91228e-12
100590	Red wine intake	4603	-0.544848	0.0920623	0.121868	0.0486611	0.0626792	0.00996978	0.0821297	0.0342215	0.0269125	0.0532545	0.0289985	0.0303053	0.00175804	0.0839386	0.0034251	0.00428945	0.00987274	0.00355888	0.0041643	6.79668e-05	0.00558617	0.00108547	0.000317847
2296	Falls in the last year	215945	1.26116	0.0825206	0.0966272	0.0926437	0.0452735	0.0927732	0.0829545	0.05321	0.163054	0.0719103	0.0133675	3.90991e-06	8.06518e-10	2.16697e-11	5.59797e-09	1.61766e-10	2.24992e-10	4.92341e-10	1.59304e-10	4.38402e-08	6.41152e-10	1.85844e-10	2.5093e-10
2306	Weight change compared with 1 year ago	215945	-2.004	1.12736e-15	1.57854e-20	9.18182e-19	1.01985e-16	3.52642e-16	1.6156e-16	4.96846e-16	2.83313e-21	1.36589e-17	7.75723e-16	1.48125e-18	9.41965e-05	2.25751e-06	0.000146376	0.000571114	0.000201834	0.000154956	8.82748e-05	8.94738e-05	0.000376558	9.61009e-18	2.70525e-06
2316	Wheeze or whistling in the chest in last year	553671	0	1	1	1	1	1	1	1	1	1	1	1	1	1	1	1	1	1	1	1	1	1	1
100630	Rose wine intake	1144	-0.461198	0.0609577	0.059898	0.0557943	0.0722081	0.0504244	0.0563681	0.0573263	0.040821	0.0613658	0.110753	0.0619857	0.22658	0.364066	0.295535	0.196824	0.206622	0.171206	0.108751	0.105154	0.295396	0.208265	0.108514
2335	Chest pain or discomfort	559223	0	1	1	1	1	1	1	1	1	1	1	1	1	1	1	1	1	1	1	1	1	1	1
2345	Ever had bowel cancer screening	556199	0	1	1	1	1	1	1	1	1	1	1	1	1	1	1	1	1	1	1	1	1	1	1
2355	Most recent bowel cancer screening	63737	0.0309985	3.24945e-05	0.00124185	0.000130902	1.42034e-06	0.000231978	1.87974e-05	0.00010744	0.189072	2.92414e-05	8.48666e-05	5.03277e-13	0.0431148	0.226182	0.0456844	0.0295154	0.296442	0.0261099	0.0771989	0.56633	0.0144006	0.0239416	4.20509e-08
2365	Ever had prostate specific antigen (PSA) test	245526	0	1	1	1	1	1	1	1	1	1	1	1	1	1	1	1	1	1	1	1	1	1	1
100670	White wine intake	4966	-1.40707	0.0524252	0.100997	0.0649939	0.121874	0.0330482	0.0746555	0.0924799	0.0722787	0.0468531	0.156244	0.0609141	0.00427033	0.0311176	0.00505293	0.00165613	0.0212983	0.00364885	0.0035898	0.000110811	0.0109854	0.00257777	0.00364554
2375	Relative age of first facial hair	0	0	2.73048e-112	5.01849e-115	3.82302e-106	1.93338e-119	1.20854e-124	4.11741e-117	3.82714e-116	6.21945e-127	4.13324e-113	1.74784e-30	2.48801e-145	1	1	1	1	1	1	1	1	1	1	1
2385	Relative age voice broke	0	0	2.90351e-115	4.54535e-120	4.51798e-117	4.23993e-123	8.17334e-127	3.0053e-118	2.5439e-121	4.96667e-140	1.49755e-118	1.13806e-45	5.95576e-159	1	1	1	1	1	1	1	1	1	1	1
2395	Hair/balding pattern	0	0	2.53197e-10	4.32798e-12	1.75815e-11	5.57417e-11	2.22899e-10	2.70042e-10	8.05821e-11	1.34629e-11	1.54922e-11	5.42272e-11	3.96538e-12	1	1	1	1	1	1	1	1	1	1	1
2405	Number of children fathered	0	0	3.08497e-113	1.28748e-90	1.73063e-133	3.36112e-130	2.31391e-119	1.00519e-107	4.94625e-123	1.42232e-103	5.04206e-109	4.27714e-96	3.63061e-99	1	1	1	1	1	1	1	1	1	1	1
100710	Beer/cider intake	1962	0.527338	2.68476e-06	0.00013768	4.26594e-05	1.61566e-06	0.000137981	1.24161e-05	1.0069e-06	3.12074e-09	5.11524e-06	5.70768e-07	1.11711e-09	0.00380063	0.0255252	0.00415682	0.0021943	0.00238585	0.00065211	0.0176931	0.00279029	0.0113011	0.00460783	0.00567756
2415	Had major operations	0	0	1.33401e-08	1.45908e-06	3.98527e-08	3.56662e-10	2.61991e-09	4.61675e-09	6.69178e-09	3.16314e-08	2.86202e-09	1.4206e-10	1.22132e-06	1	1	1	1	1	1	1	1	1	1	1
100720	Fortified wine intake	591	-1.01279	0.0658336	0.0362573	0.0376391	0.0781328	0.029473	0.0738917	0.0750012	0.0172759	0.077531	0.0489749	0.128244	0.0364559	0.033816	0.0313093	0.0172993	0.065657	0.0364915	0.0692522	0.0107643	0.0521479	0.0136133	0.038555
96	Time since interview start at which blood pressure screen(s) shown	215938	-0.286768	1e-255	1e-255	1e-255	1e-255	1e-255	1e-255	1e-255	1e-255	1e-255	1e-255	3.47079e-81	1.83886e-268	1e-255	1.52395e-280	1e-255	1e-255	2.10739e-282	2.2693e-308	5.67099e-271	3.74685e-293	4.86957e-272	2.49965e-28
100730	Spirits intake	1793	-1.46881	0.0392318	0.121857	0.0610694	0.021714	0.0539583	0.0635105	0.0245883	0.00040513	0.0548454	0.0365293	0.000252169	0.0454663	0.248348	0.0269422	0.0217736	0.1686	0.0659549	0.0160937	0.0469405	0.0691613	0.0224572	0.0337259
100740	Other alcohol intake	378	2.0566	0.00971622	0.015428	0.0232058	0.00404243	0.0134502	0.0198136	0.00774877	0.00962043	0.00646292	0.00791287	0.012262	0.25446	0.38983	0.216944	0.177871	0.192046	0.261997	0.217557	0.1548	0.247841	0.280083	0.132569
2443	Diabetes diagnosed by doctor	563772	0	1	1	1	1	1	1	1	1	1	1	1	1	1	1	1	1	1	1	1	1	1	1
2453	Cancer diagnosed by doctor	215945	-1.08744	6.8446e-08	1.4232e-08	4.46075e-08	7.52409e-09	7.90524e-09	2.92749e-07	4.90096e-08	2.9997e-08	1.60362e-08	5.65607e-08	3.15936e-06	1.67486e-13	7.29104e-17	7.38543e-15	1.32122e-15	8.92086e-16	2.70602e-14	1.51347e-14	3.52612e-15	5.30649e-15	1.08248e-14	0.00173907
100760	Breakfast cereal consumed	458607	0	1	1	1	1	1	1	1	1	1	1	1	1	1	1	1	1	1	1	1	1	1	1
2463	Fractured/broken bones in last 5 years	562444	0	1	1	1	1	1	1	1	1	1	1	1	1	1	1	1	1	1	1	1	1	1	1
100770	Porridge intake	5214	0.371854	0.0427127	0.028487	0.0481468	0.0399388	0.122302	0.0568309	0.0278364	0.0203825	0.0393093	0.0629896	0.186777	0.0596703	0.0529668	0.0635825	0.0374637	0.168718	0.0538877	0.0615096	0.0671968	0.0320896	0.0386894	0.0754932
2473	Other serious medical condition/disability diagnosed by doctor	215945	0.758934	1.68335e-05	2.27853e-05	2.03699e-06	2.51992e-06	2.17511e-07	5.58293e-05	3.37884e-06	5.79298e-07	3.13996e-06	2.0294e-06	2.91351e-09	4.17553e-38	1.34025e-38	2.66722e-37	6.35229e-44	1.20658e-44	2.85533e-42	1.89413e-42	4.5813e-47	5.75863e-39	6.3676e-39	4.02915e-21
2492	Taking other prescription medications	215945	0.7561	7.00222e-09	6.09188e-08	1.36965e-08	1.47328e-08	1.08819e-09	2.66329e-09	1.7338e-08	3.1715e-06	2.2573e-09	3.99173e-10	5.89665e-15	0.000116269	0.000966376	0.000318021	1.14601e-06	0.000101775	9.66145e-06	0.000236666	0.00435597	1.83683e-05	5.94145e-05	4.54833e-05
100800	Muesli intake	4644	-0.111935	0.847784	0.716891	0.935063	0.809396	0.685311	0.858816	0.558385	0.55628	0.799069	0.840418	0.61248	0.337601	0.201846	0.336612	0.134559	0.43271	0.498078	0.246581	0.360778	0.453468	0.249397	0.359813
100810	Oat crunch intake	947	0.340235	0.180954	0.37233	0.248721	0.126601	0.126396	0.177615	0.197737	0.239517	0.0638319	0.146081	0.708995	0.15304	0.16059	0.105621	0.364793	0.0866526	0.0838382	0.170058	0.0635595	0.206282	0.092917	0.250347
100820	Sweetened cereal intake	725	-0.328689	0.653761	0.461072	0.59657	0.514695	0.76626	0.630465	0.616449	0.701895	0.62231	0.586362	0.528519	0.350637	0.239948	0.302234	0.114984	0.368935	0.382026	0.304096	0.488396	0.299571	0.344932	0.47455
100830	Plain cereal intake	2833	-0.333947	0.113591	0.117389	0.120768	0.208501	0.0875435	0.100584	0.172231	0.0544187	0.123174	0.276286	0.11216	0.493581	0.475169	0.539587	0.586936	0.299369	0.591409	0.45473	0.485828	0.414402	0.37507	0.324923
100840	Bran cereal intake	3190	-0.162072	0.129078	0.0969036	0.0750601	0.0924724	0.0903924	0.153694	0.180679	0.140679	0.215385	0.192251	0.204293	0.814393	0.756915	0.954751	0.388012	0.774016	0.721495	0.802074	0.789923	0.699578	0.839931	0.944092
100850	Whole-wheat cereal intake	3707	-0.206853	0.00326575	0.00927821	0.0037946	0.0165074	0.00503685	0.00229473	0.0075526	0.00897362	0.002376	0.0174603	0.0241447	0.216296	0.119374	0.376482	0.397337	0.416933	0.566549	0.0965607	0.161459	0.400427	0.302526	0.45492
100860	Other cereal intake	718	-0.30501	0.791491	0.817118	0.97912	0.953782	0.505913	0.847571	0.800942	0.953629	0.656687	0.763073	0.610751	0.36889	0.10105	0.416731	0.378833	0.43171	0.600936	0.413706	0.593142	0.262604	0.458978	0.356738
100880	Dried fruit added to cereal	8881	-1.19046	0.762705	0.572121	0.754865	0.947374	0.86552	0.789237	0.82912	0.608678	0.802368	0.699496	0.602528	0.000419552	0.00141247	0.00113945	0.00336845	3.0214e-05	0.000370442	0.000753383	0.00681833	0.000489653	0.000250957	0.000625334
24508	Distance (Euclidean) to coast	214136	-0.0368091	5.01904e-25	3.64881e-28	0.00159747	1.93818e-19	6.57438e-38	2.4277e-19	5.22867e-28	2.83308e-34	4.659e-27	2.13846e-26	2.19456e-18	7.89382e-06	7.19676e-05	0.111574	0.000522239	4.77112e-20	0.000158977	0.0123818	0.000132471	4.53044e-07	5.79718e-07	0.0780231
100890	Milk added to cereal	16870	0.479406	0.571862	0.480226	0.479701	0.549526	0.510578	0.708448	0.577456	0.44252	0.446275	0.688586	0.685353	0.284792	0.520763	0.255686	0.15827	0.271595	0.255585	0.208141	0.299031	0.399914	0.289084	0.333971
100900	Intake of sugar added to cereal	3734	-0.560151	0.0814402	0.0576931	0.0859454	0.0651586	0.0599244	0.0484586	0.108275	0.110687	0.0497684	0.0586106	0.0219818	0.166471	0.170524	0.262297	0.130598	0.319333	0.242877	0.174375	0.204188	0.0988761	0.131792	0.0592613
100910	Intake of artificial sweetener added to cereal	928	0.588169	0.00124021	0.000357053	0.00077414	0.000811344	0.00132332	0.00247955	0.00186543	0.00954511	0.000362312	0.00278944	0.0025882	0.0486804	0.0330267	0.0483728	0.122782	0.0134529	0.0498941	0.0729927	0.0382841	0.0560355	0.0422324	0.0738429
100920	Type milk consumed	30087	-0.836321	3.57607e-05	1.6752e-05	0.000147611	0.0161026	9.28951e-07	0.000402754	5.81322e-06	0.0406863	4.43317e-06	0.00082708	6.40621e-06	5.60946e-09	1.11024e-11	7.51668e-08	1.32089e-06	2.05918e-08	6.64334e-09	4.72519e-08	0.000148992	3.22948e-07	6.49716e-09	1.3799e-10
2624	Frequency of heavy DIY in last 4 weeks	74903	0.46982	4.23673e-16	2.94173e-13	5.07357e-16	1.51158e-18	2.88281e-17	3.83418e-17	2.80753e-15	2.03177e-14	1.38642e-16	2.06856e-18	9.52578e-19	4.67101e-22	1.01379e-15	1.69903e-23	3.14823e-26	4.24957e-20	6.82849e-23	3.11231e-23	6.15526e-19	2.14068e-22	1.04859e-22	4.80967e-23
2634	Duration of heavy DIY	74903	0.41538	5.40333e-14	2.76133e-12	4.97286e-13	5.69531e-17	5.98343e-14	9.85164e-15	3.1736e-13	1.42653e-13	4.82289e-14	4.60134e-15	1.71635e-17	6.59673e-15	8.39458e-11	4.11369e-15	1.08572e-16	8.76953e-13	2.61271e-15	4.14524e-15	1.99775e-12	4.5199e-16	4.39177e-16	2.9992e-14
100940	Bread consumed	458607	0	1	1	1	1	1	1	1	1	1	1	1	1	1	1	1	1	1	1	1	1	1	1
2644	Light smokers, at least 100 smokes in lifetime	148910	0	1	1	1	1	1	1	1	1	1	1	1	1	1	1	1	1	1	1	1	1	1	1
100950	Sliced bread intake	17959	-0.156502	0.0780718	0.0144223	0.322212	0.124975	0.0478385	0.0769776	0.0974447	0.250555	0.0321791	0.11553	0.00118383	0.0274492	0.00985647	0.0283555	0.116592	0.200576	0.0349804	0.181949	0.00820596	0.007068	0.0147124	0.00119369
2654	Non-butter spread type details	105617	-0.826086	0.115638	0.207952	0.134525	0.0759402	0.0583107	0.0779177	0.0476176	0.218969	0.0887359	0.0971672	0.0045441	0.142019	0.0951846	0.149559	0.0714591	0.0994687	0.0953348	0.24962	0.142635	0.0817641	0.163854	0.0321798
4	Biometrics duration	215794	-0.126057	8.93452e-68	6.5529e-35	5.94168e-64	9.48719e-88	7.74626e-101	3.14261e-59	5.80275e-66	5.12129e-36	4.13639e-92	2.01561e-77	3.78996e-78	2.78341e-53	3.43011e-32	2.24969e-59	8.28096e-50	5.99296e-103	2.0756e-43	1.4175e-59	0.118373	5.99477e-60	1.25154e-55	5.89133e-60
21	Weight method	215795	-4.07355	0.248064	0.518289	0.231757	0.461978	0.183408	0.315628	0.208961	0.238628	0.294147	0.205044	0.15319	0.0334704	0.0424067	0.02396	0.0219953	0.132731	0.0169765	0.0428486	0.00592829	0.0285751	0.0509005	0.0217875
2664	Reason for reducing amount of alcohol drunk	81623	0.397133	2.5312e-63	3.38174e-69	1.49437e-69	9.86667e-64	7.93179e-62	5.24152e-58	3.50705e-61	3.60463e-62	6.16436e-66	2.44106e-64	2.76169e-94	2.28395e-18	2.26377e-13	1.95261e-19	8.59445e-19	8.83526e-25	1.35545e-22	6.25852e-15	3.96426e-19	5.7373e-20	1.0988e-17	1.1065e-18
2674	Ever had breast cancer screening / mammogram	305346	0	1	1	1	1	1	1	1	1	1	1	1	1	1	1	1	1	1	1	1	1	1	1
2684	Years since last breast cancer screening / mammogram	169419	-0.00371097	1	1	1	1	1	1	1	1	1	1	1	0.690723	0.776659	0.763998	0.666617	0.477319	0.352695	0.836882	0.748714	0.861923	0.69839	0.160756
2694	Ever had cervical smear test	305007	0	1	1	1	1	1	1	1	1	1	1	1	1	1	1	1	1	1	1	1	1	1	1
2704	Years since last cervical smear test	189045	-0.254185	1	1	1	1	1	1	1	1	1	1	1	1.85919e-187	1.44924e-128	1.99964e-194	1.89356e-192	1.90043e-184	9.30869e-208	1.71337e-195	6.60972e-215	2.33928e-202	1.80912e-203	5.0355e-76
2714	Age when periods started (menarche)	209896	0.0323367	1	1	1	1	1	1	1	1	1	1	1	0.00010029	1.7657e-06	0.00174173	6.05426e-06	0.000247295	0.000588238	2.02566e-05	0.0019809	9.92648e-05	0.00458901	2.25532e-56
101020	Baguette intake	2412	-1.18624	0.0685605	0.0733075	0.151254	0.0149558	0.0812995	0.0699063	0.059505	0.0642712	0.0421215	0.0560833	0.0107961	0.179545	0.223482	0.266344	0.18169	0.0506222	0.236108	0.158629	0.251763	0.183441	0.121218	0.16039
2724	Had menopause	257716	0	1	1	1	1	1	1	1	1	1	1	1	1	1	1	1	1	1	1	1	1	1	1
2734	Number of live births	215802	0.00404587	1	1	1	1	1	1	1	1	1	1	1	0.621916	0.576683	0.00337638	0.191356	0.181787	0.0858039	0.453596	0.486276	0.110019	0.620018	0.137014
2744	Birth weight of first child	173806	0.276385	1	1	1	1	1	1	1	1	1	1	1	3.02826e-203	1.16527e-213	1.64941e-201	1.08879e-193	4.50791e-147	8.99033e-232	2.1509e-207	2.29602e-200	2.47432e-212	3.28132e-238	4.25338e-224
2754	Age at first live birth	148065	0.31534	1	1	1	1	1	1	1	1	1	1	1	4.39387e-227	5.86994e-157	3.64516e-242	1.55423e-269	5.35927e-255	1.02714e-262	2.6632e-210	3.74243e-187	1.91609e-242	2.99366e-235	8.68184e-295
2764	Age at last live birth	147860	0.24015	1	1	1	1	1	1	1	1	1	1	1	2.52031e-132	3.09539e-97	2.70358e-152	6.9446e-149	5.51947e-131	2.43472e-157	1.56735e-112	8.63719e-108	6.55532e-131	4.14624e-136	1.42863e-157
2774	Ever had stillbirth, spontaneous miscarriage or termination	300830	0	1	1	1	1	1	1	1	1	1	1	1	1	1	1	1	1	1	1	1	1	1	1
2784	Ever taken oral contraceptive pill	304867	0	1	1	1	1	1	1	1	1	1	1	1	1	1	1	1	1	1	1	1	1	1	1
101090	Bap intake	877	0.629689	0.0574118	0.0330652	0.035746	0.0153991	0.0829378	0.0528365	0.0488172	0.0887113	0.0281647	0.072205	0.0216958	0.0618722	0.0179874	0.065199	0.126471	0.153654	0.126699	0.0411894	0.0195569	0.0493422	0.0583782	0.0550998
2794	Age started oral contraceptive pill	171241	0.0257049	1	1	1	1	1	1	1	1	1	1	1	0.00459117	0.372982	0.00696743	5.8885e-07	0.000177965	0.000835501	0.278576	0.000279215	0.00842882	0.00193657	0.00442694
2804	Age when last used oral contraceptive pill	155476	0.116399	1	1	1	1	1	1	1	1	1	1	1	1.99774e-34	1.44666e-35	2.08649e-38	1.56183e-29	2.48295e-26	4.89019e-30	4.11585e-47	1.308e-30	1.5446e-34	2.18599e-35	1.7927e-24
2814	Ever used hormone-replacement therapy (HRT)	304657	0	1	1	1	1	1	1	1	1	1	1	1	1	1	1	1	1	1	1	1	1	1	1
2824	Age at hysterectomy	40438	0.25981	1	1	1	1	1	1	1	1	1	1	1	2.0168e-41	3.25948e-15	1.11573e-41	1.43178e-44	9.89591e-44	3.53014e-46	4.84431e-39	4.00437e-43	5.15395e-38	3.19164e-47	1.33105e-48
2834	Bilateral oophorectomy (both ovaries removed)	301320	0	1	1	1	1	1	1	1	1	1	1	1	1	1	1	1	1	1	1	1	1	1	1
2844	Had other major operations	215941	0.410281	1	1	1	1	1	1	1	1	1	1	1	2.5883e-05	5.80984e-05	2.4577e-05	7.72261e-07	1.24831e-05	8.0936e-06	8.19743e-06	3.14683e-06	1.10312e-05	1.17984e-05	0.00502922
101160	Bread roll intake	4090	0.580686	0.0557386	0.00718779	0.0741934	0.0240695	0.0370563	0.0859383	0.0386511	0.112615	0.0528203	0.0533988	0.0601365	0.0217532	0.00147785	0.0165326	0.0342595	0.0317074	0.0074287	0.0264474	0.0634604	0.0217055	0.0118609	0.0615596
2867	Age started smoking in former smokers	44312	0.0919357	6.51651e-10	1.87091e-09	3.93919e-08	1.70795e-09	6.58642e-10	3.39667e-10	2.1092e-09	6.33831e-10	5.87628e-10	2.96221e-11	3.41111e-11	5.48213e-07	4.34236e-06	2.8074e-07	1.1983e-09	7.20039e-06	3.90972e-07	1.18236e-06	5.05918e-06	1.07143e-07	8.39324e-08	1.38017e-06
2877	Type of tobacco previously smoked	44608	3.19234	0.135182	0.218427	0.323401	0.0605845	0.155681	0.150646	0.142708	0.270924	0.16409	0.249969	0.162163	0.0435553	0.00703807	0.0475091	0.0641077	0.480288	0.0958998	0.164125	0.0841277	0.0624932	0.0348373	0.00725324
2887	Number of cigarettes previously smoked daily	44197	-0.135054	1.15967e-22	6.35314e-11	3.76225e-19	8.00723e-26	1.75823e-17	3.95595e-20	1.77319e-23	2.45652e-43	5.31729e-26	1.95526e-28	3.44759e-29	1.99931e-13	1.24534e-05	6.59527e-15	1.23596e-14	5.4349e-12	3.78936e-15	4.84665e-14	1.39705e-30	3.87889e-18	9.21038e-16	8.86912e-13
2897	Age stopped smoking	44348	-0.368347	3.70877e-80	1.0666e-34	3.90233e-86	1.27613e-93	5.1495e-84	3.05042e-85	1.1379e-82	2.22234e-107	1.33596e-84	1.79762e-92	5.62658e-90	4.75566e-90	5.69229e-52	8.52669e-92	4.57413e-98	7.00035e-114	2.21244e-109	1.52597e-80	2.25267e-92	9.40159e-103	2.03124e-102	8.60974e-85
2907	Ever stopped smoking for 6+ months	133090	0	1	1	1	1	1	1	1	1	1	1	1	1	1	1	1	1	1	1	1	1	1	1
101230	Naan bread intake	540	-6.9397	0.0756275	0.215064	0.0209859	0.0550504	0.137879	0.0795038	0.0557611	0.0717907	0.0474123	0.0374766	0.262832	0.00801592	0.221318	0.0177028	0.00276161	0.0648418	0.0127871	0.00325341	0.00782291	0.0420311	0.00366805	0.00319356
2926	Number of unsuccessful stop-smoking attempts	40727	0.0166708	0.0298673	0.00721075	0.00861397	0.0925339	0.0969742	0.0298481	0.0167161	0.142447	0.0182506	0.0641214	0.00291567	0.383966	0.267326	0.20435	0.328662	0.826845	0.496635	0.362068	0.778886	0.405948	0.613897	0.479429
101240	Garlic bread intake	567	-1.47732	0.0644825	0.0752078	0.0381824	0.0575096	0.106914	0.0427508	0.060154	0.0360077	0.0480131	0.0308044	0.0262294	0.0584834	0.0682824	0.0652215	0.0187715	0.15352	0.151447	0.275404	0.0277618	0.0573995	0.0631674	0.0361345
2936	Likelihood of resuming smoking	44608	0.642339	0.00841496	0.00700661	0.00278692	0.00835473	0.0360608	0.00742867	0.00579208	0.0140572	0.00204955	0.00345822	0.00230694	8.48793e-08	1.23794e-05	6.66796e-07	1.35512e-08	4.18246e-11	1.40009e-10	8.02986e-05	1.69746e-11	1.55698e-08	2.17168e-08	1.47342e-06
101250	Crispbread intake	3907	-1.11697	0.28818	0.159362	0.205595	0.241476	0.239792	0.317205	0.276083	0.321508	0.386798	0.256575	0.306992	0.103094	0.0529576	0.0833226	0.171082	0.101874	0.0569508	0.0979716	0.14187	0.110354	0.139509	0.111244
2946	Father's age	49321	0.124086	1.82569e-10	1.38028e-12	2.99368e-11	8.69755e-08	2.58015e-07	3.35264e-09	1.45906e-09	1.63915e-06	3.23309e-10	4.29987e-10	3.60092e-13	5.95789e-14	2.03967e-11	3.78624e-14	9.12683e-15	7.26766e-11	1.97824e-17	5.52352e-12	1.48172e-13	4.42621e-16	2.2755e-14	2.6649e-20
2956	General pain for 3+ months	9362	0	1	1	1	1	1	1	1	1	1	1	1	1	1	1	1	1	1	1	1	1	1	1
101260	Oatcakes intake	1174	0.410749	0.123784	0.16588	0.134682	0.0782668	0.158602	0.12944	0.0737084	0.234645	0.0521384	0.124199	0.129927	0.27003	0.0876724	0.347137	0.160866	0.165924	0.349249	0.348762	0.274167	0.333486	0.342373	0.176223
2966	Age high blood pressure diagnosed	44472	0.200305	6.6397e-20	2.43882e-20	3.03151e-24	2.25567e-10	2.17204e-15	2.47786e-19	2.20099e-19	4.13088e-25	1.05716e-18	6.6764e-20	1.01954e-34	8.83755e-26	7.74665e-27	1.59731e-27	1.61708e-18	1.42039e-23	3.91772e-26	1.92719e-23	5.90858e-28	1.6899e-21	1.41652e-24	9.59426e-30
101270	Other bread intake	1713	-0.33102	0.0241101	0.211	0.0166594	0.0237181	0.063203	0.0210027	0.0501378	0.0163831	0.00794886	0.0416907	0.0186059	0.0981722	0.0388435	0.0857352	0.0690182	0.174205	0.118853	0.130662	0.0955046	0.088313	0.144594	0.119677
2976	Age diabetes diagnosed	6382	1.42082	1.90525e-79	1.01496e-69	4.79757e-79	2.01263e-70	9.52019e-71	8.14005e-83	9.63198e-59	7.52154e-82	6.95937e-60	3.30536e-79	1.98563e-100	9.53256e-132	1.25787e-102	2.9262e-131	1.97307e-126	2.54256e-108	2.64079e-121	3.58227e-64	6.07714e-139	1.11758e-124	2.448e-129	3.57308e-138
2986	Started insulin within one year diagnosis of diabetes	28459	0	1	1	1	1	1	1	1	1	1	1	1	1	1	1	1	1	1	1	1	1	1	1
101300	Butter/margarine on bread/crackers	296225	0	1	1	1	1	1	1	1	1	1	1	1	1	1	1	1	1	1	1	1	1	1	1
3005	Fracture resulting from simple fall	52561	0	1	1	1	1	1	1	1	1	1	1	1	1	1	1	1	1	1	1	1	1	1	1
101310	Number of bread slices with butter/margarine	14502	-0.152937	0.123612	0.0304749	0.28413	0.214232	0.0857575	0.15602	0.160276	0.177491	0.0604683	0.157007	0.00387664	0.0447408	0.0389598	0.0402442	0.0944098	0.178932	0.0543702	0.11382	0.0176786	0.00782502	0.0300288	0.000579076
101350	Number of baguettes with butter/margarine	1374	-0.700785	0.134797	0.102589	0.174464	0.0564045	0.120992	0.174237	0.0856603	0.234439	0.13187	0.155607	0.0109188	0.0759593	0.106277	0.0932597	0.0371914	0.104193	0.109459	0.118872	0.0419561	0.0411231	0.0617596	0.111153
3059	Result ranking	198597	0	1	1	1	1	1	1	1	1	1	1	1	1	1	1	1	1	1	1	1	1	1	1
3060	Time of blow measurement	0	0	1	1	1	1	1	1	1	1	1	1	1	1	1	1	1	1	1	1	1	1	1	1
3061	Acceptability of each blow result	198597	0.0584084	0.000155987	0.614098	0.000577005	8.04662e-05	0.000179831	0.000204947	0.000290809	3.76882e-06	4.07323e-05	1.37579e-05	1.53376e-07	7.35757e-12	5.32661e-07	9.60917e-12	1.32174e-16	3.09632e-14	7.22425e-14	5.92557e-14	3.91141e-19	5.97203e-13	2.91104e-13	6.92648e-16
3062	Forced vital capacity (FVC)	198597	1.14833	1e-255	1e-255	1e-255	1e-255	1e-255	1e-255	1e-255	1e-255	1e-255	1e-255	1e-255	1e-255	1e-255	1e-255	1e-255	1e-255	1e-255	1e-255	1e-255	1e-255	1e-255	1e-255
3063	Forced expiratory volume in 1-second (FEV1)	198597	1.30179	1e-255	1e-255	1e-255	1e-255	1e-255	1e-255	1e-255	1e-255	1e-255	1e-255	1e-255	1e-255	1e-255	1e-255	1e-255	1e-255	1e-255	1e-255	1e-255	1e-255	1e-255	1e-255
3064	Peak expiratory flow (PEF)	198597	0.97729	1e-255	1e-255	1e-255	1e-255	1e-255	1e-255	1e-255	1e-255	1e-255	1e-255	1e-255	1e-255	1e-255	1e-255	1e-255	1e-255	1e-255	1e-255	1e-255	1e-255	1e-255	1e-255
3065	Ordering of blows	198597	0.600404	3.24444e-99	1.44807e-06	7.02292e-101	1.24813e-113	3.94238e-116	4.70043e-103	3.94005e-104	2.45708e-113	9.31587e-103	5.23011e-107	3.05808e-127	5.03749e-120	2.45164e-08	1.70192e-122	5.74236e-140	1.48424e-153	3.89997e-128	8.32e-124	3.53502e-153	6.64918e-126	1.3247e-123	2.00272e-144
3066	Data points for blow	1397628	0	1	1	1	1	1	1	1	1	1	1	1	1	1	1	1	1	1	1	1	1	1	1
3077	Seating box height	215596	-0.330284	4.77949e-05	5.76806e-06	9.59667e-05	7.14292e-06	8.23749e-06	2.11878e-05	4.45914e-05	0.000180175	0.000136247	0.0611474	1.50342e-06	0.0163352	0.000683808	0.0380309	0.000360567	0.00121523	0.0302952	0.0015216	0.055537	0.0354027	1.83898e-20	0.00150684
3079	Pace-maker	564148	0	1	1	1	1	1	1	1	1	1	1	1	1	1	1	1	1	1	1	1	1	1	1
3081	Foot measured for bone density	145493	-0.335328	1.15102e-12	1.44487e-17	4.23485e-11	1.11221e-11	2.66192e-13	1.70708e-11	2.06113e-12	1.59277e-12	4.53894e-12	1.39233e-11	3.17871e-12	0.000310076	1.4567e-05	0.000153414	1.93699e-05	8.58652e-05	4.65491e-05	0.000206012	0.000451909	0.000724075	0.000273275	0.00262795
3082	Fractured heel	321523	0	1	1	1	1	1	1	1	1	1	1	1	1	1	1	1	1	1	1	1	1	1	1
3083	Heel quantitative ultrasound index (QUI), manual entry	19598	0.121257	1.07663e-10	2.5157e-08	1.57192e-09	5.80047e-13	3.6545e-14	3.62391e-11	9.66071e-14	3.01853e-11	4.24062e-06	5.46958e-11	1.42119e-13	1.42822e-05	0.00346615	0.000145061	1.70881e-06	9.91762e-10	3.49299e-05	0.000523292	4.77709e-05	4.39826e-05	0.000114614	2.91589e-05
3084	Heel bone mineral density (BMD), manual entry	19598	0.127411	2.0438e-12	1.15277e-09	1.00553e-10	6.4513e-15	3.63629e-16	8.00025e-13	1.59774e-15	5.1954e-13	2.45037e-07	1.20998e-12	1.15535e-15	5.11892e-06	0.00141041	7.74035e-05	8.06698e-07	3.46069e-10	1.743e-05	0.000160788	1.63007e-05	1.97202e-05	4.76416e-05	1.30332e-05
3085	Heel Broadband ultrasound attenuation (BUA), manual entry	19598	0.0995313	9.88763e-12	1.03949e-11	1.09359e-10	7.5772e-13	1.76686e-15	1.62465e-11	5.78018e-13	5.13701e-11	3.61619e-08	4.91803e-12	5.76827e-13	0.000368462	0.000237188	0.00313947	0.000148006	5.94005e-07	0.00514927	0.00670976	0.00271826	0.000811722	0.00121446	0.0015138
101390	Number of baps with butter/margarine	314	1.46452	0.0264408	0.0319917	0.0453235	0.0240802	0.0245526	0.0158628	0.031277	0.0353187	0.0171871	0.0282198	0.0229342	0.0320018	0.00948692	0.0352923	0.0890802	0.0603197	0.0416789	0.0695084	0.033116	0.0250516	0.0368651	0.144436
3086	Speed of sound through heel, manual entry	19598	0.123118	1.58485e-05	0.00166716	0.000574651	1.04089e-06	6.08638e-07	3.76975e-06	6.455e-07	1.07124e-06	0.00346711	3.4207e-06	2.4605e-07	1.05231e-05	0.00870925	0.000332444	1.69866e-06	3.0805e-08	1.56981e-05	0.000427731	1.85372e-05	2.18855e-05	7.86641e-05	3.46542e-06
3088	Contra-indications for spirometry	561436	0	1	1	1	1	1	1	1	1	1	1	1	1	1	1	1	1	1	1	1	1	1	1
3089	Caffeine drink within last hour	517854	0	1	1	1	1	1	1	1	1	1	1	1	1	1	1	1	1	1	1	1	1	1	1
3090	Used an inhaler for chest within last hour	517854	0	1	1	1	1	1	1	1	1	1	1	1	1	1	1	1	1	1	1	1	1	1	1
101430	Number of bread rolls with butter/margarine	2626	0.644718	0.0888299	0.0193315	0.122119	0.118422	0.032529	0.15072	0.0945349	0.152917	0.0458778	0.0762096	0.268903	0.0234327	0.00344882	0.0125932	0.012748	0.0466012	0.00980197	0.0300246	0.0629552	0.0346201	0.0263245	0.0920591
3132	Spirometry device serial number	510967	0	1	1	1	1	1	1	1	1	1	1	1	1	1	1	1	1	1	1	1	1	1	1
3137	Number of measurements made	198597	0.0334282	6.69135e-48	0.00510055	1.21993e-50	4.37862e-55	1.24532e-51	5.33061e-50	1.65085e-47	1.64295e-62	2.52824e-53	2.3866e-54	1.8674e-63	8.83535e-05	0.00220719	3.57133e-06	6.93208e-07	0.00103969	1.12909e-05	0.000990971	3.08729e-23	0.000157749	1.03214e-07	1.68559e-05
3140	Pregnant	304917	0	1	1	1	1	1	1	1	1	1	1	1	1	1	1	1	1	1	1	1	1	1	1
3143	Ankle spacing width	125887	0.067775	5.61253e-23	9.28476e-32	1.27673e-53	3.18189e-20	1.29741e-21	4.22538e-25	1.57667e-18	9.78538e-29	4.60725e-33	3.71493e-24	1.65607e-25	1.86995e-10	6.3898e-13	1.74081e-05	3.83929e-08	2.19495e-07	1.13389e-13	7.10032e-11	3.2283e-13	1.10931e-09	9.8667e-16	1.36289e-13
3144	Heel Broadband ultrasound attenuation, direct entry	125883	0.097619	6.21307e-40	8.9186e-37	1.61336e-37	1.60731e-42	4.31064e-40	7.29474e-41	3.95859e-51	1.96946e-49	1.90605e-22	3.84354e-40	1.03383e-52	4.39584e-20	4.25886e-10	1.60521e-11	2.08083e-31	4.7664e-27	2.70409e-17	8.53004e-11	2.20591e-16	6.40777e-19	2.4055e-15	1.53666e-19
3146	Speed of sound through heel	125887	0.0682824	2.14803e-29	4.28317e-19	9.13241e-22	4.75502e-33	7.3762e-34	7.60725e-31	1.49097e-40	3.19081e-43	9.14119e-15	2.13372e-29	2.08379e-39	1.36836e-10	0.565501	2.38546e-06	1.74917e-18	1.19012e-24	5.37637e-11	0.000272075	2.495e-11	1.06644e-09	4.34359e-06	1.0658e-09
3147	Heel quantitative ultrasound index (QUI), direct entry	125887	0.0815173	2.11312e-34	1.09393e-25	5.27861e-28	7.0278e-38	1.20521e-37	9.20204e-36	4.25212e-46	2.20706e-47	4.94423e-18	1.71301e-34	7.3614e-46	1.80397e-14	0.0613799	1.79492e-08	3.11753e-24	2.43599e-27	6.41547e-14	1.50638e-06	7.33606e-14	2.1696e-13	2.33776e-09	1.36165e-13
3148	Heel bone mineral density (BMD)	125874	0.0804253	5.03527e-34	5.10949e-25	5.92001e-28	1.30476e-37	5.55794e-37	2.2578e-35	1.67086e-45	1.78911e-47	8.79716e-18	7.74754e-34	7.14882e-46	4.00347e-14	0.081571	3.32504e-08	1.05126e-23	7.46347e-27	1.52756e-13	2.14333e-06	1.09997e-13	5.30202e-13	4.67771e-09	2.86866e-13
3159	Smoked cigarette or pipe within last hour	76626	0	1	1	1	1	1	1	1	1	1	1	1	1	1	1	1	1	1	1	1	1	1	1
3160	Weight, manual entry	2882	-0.816571	3.78282e-67	2.28171e-94	0.2774	4.06371e-74	2.74506e-74	1.28386e-72	2.20363e-70	1.91017e-79	3.60817e-76	6.44168e-80	1.55614e-97	7.41704e-24	2.53304e-39	0.00367009	4.40471e-13	2.62981e-27	1.76536e-28	2.79628e-29	5.09802e-14	1.59196e-26	4.04566e-32	1.87624e-29
101470	Number of crackers/crispbreads with butter/margarine	1524	-0.995811	0.259198	0.450787	0.300067	0.273735	0.267448	0.319178	0.290146	0.24952	0.193683	0.153394	0.123391	0.0884654	0.136538	0.103576	0.0904777	0.0630755	0.135727	0.232797	0.114718	0.184561	0.0822464	0.0317938
3166	Time blood sample collected	0	0	1	1	1	1	1	1	1	1	1	1	1	1	1	1	1	1	1	1	1	1	1	1
630	Touchscreen duration	215945	-0.672967	1e-255	1e-255	1e-255	1e-255	1e-255	1e-255	1e-255	2.70361e-118	1e-255	1e-255	1e-255	1e-255	1e-255	1e-255	1e-255	1e-255	1e-255	1e-255	3.86604e-194	1e-255	1e-255	1e-255
101510	Number of oatcakes with butter/margarine	230	1.59082	0.286551	0.481277	0.235808	0.198739	0.214461	0.311615	0.251954	0.0966767	0.18249	0.186511	0.0886472	0.171687	0.122041	0.171074	0.0521997	0.279913	0.160095	0.266736	0.170704	0.193482	0.240553	0.144606
101550	Number of other bread types with butter/margarine	728	-1.53131	0.0557739	0.0486773	0.0347123	0.0676501	0.0206646	0.0630409	0.0647132	0.0265168	0.0861117	0.0649362	0.0291318	0.0150772	0.00738625	0.0168092	0.0194911	0.0365489	0.0215115	0.0202986	0.0257708	0.0166137	0.0242236	0.0156551
5	Sample collection duration	215943	-0.126956	1.96188e-36	1.8985e-28	4.19649e-44	6.24056e-37	1.4129e-41	2.50276e-29	9.27782e-34	1.2711e-36	4.1051e-33	1.22168e-38	1.17108e-47	4.73008e-54	1.45901e-46	4.79766e-70	5.78243e-54	7.4348e-69	6.4852e-39	2.07112e-68	1.82647e-53	8.7122e-54	1.38152e-60	5.09139e-53
134	Number of self-reported cancers	215938	-0.305601	1e-255	1e-255	1e-255	1e-255	1e-255	1e-255	1e-255	1e-255	1e-255	1e-255	8.7758e-11	1.05448e-304	1e-255	1e-255	1e-255	1e-255	1e-255	1e-255	1e-255	1e-255	1e-255	4.67379e-33
3393	Hearing aid user	370991	0	1	1	1	1	1	1	1	1	1	1	1	1	1	1	1	1	1	1	1	1	1	1
135	Number of self-reported non-cancer illnesses	215938	-0.635149	1e-255	1e-255	1e-255	1e-255	1e-255	1e-255	1e-255	1e-255	1e-255	1e-255	1e-255	1e-255	1e-255	1e-255	1e-255	1e-255	1e-255	1e-255	1e-255	1e-255	1e-255	1e-255
3404	Neck/shoulder pain for 3+ months	126589	0	1	1	1	1	1	1	1	1	1	1	1	1	1	1	1	1	1	1	1	1	1	1
3414	Hip pain for 3+ months	62378	0	1	1	1	1	1	1	1	1	1	1	1	1	1	1	1	1	1	1	1	1	1	1
3426	Job involves night shift work	16527	-1.03139	0.522057	0.38422	0.476332	0.525608	0.551444	0.571547	0.743308	0.754467	0.571405	0.455632	0.733602	0.211629	0.106618	0.14937	0.105114	0.319756	0.286286	0.216232	0.496763	0.0670969	0.194709	0.260142
136	Number of operations, self-reported	215938	-0.574166	1e-255	1e-255	1e-255	1e-255	1e-255	1e-255	1e-255	1e-255	1e-255	1e-255	2.46974e-13	1e-255	1e-255	1e-255	1e-255	1e-255	1e-255	1e-255	1e-255	1e-255	1e-255	9.54416e-48
3436	Age started smoking in current smokers	14412	0.311295	4.09659e-16	3.44999e-10	7.22105e-16	1.37014e-14	2.82324e-15	1.09075e-17	1.2287e-16	8.8772e-19	7.563e-14	9.14512e-17	1.92303e-22	1.0517e-19	5.2702e-15	4.09924e-19	3.10484e-22	5.09175e-17	4.93131e-23	2.02877e-14	2.39144e-24	3.03617e-20	6.14452e-21	1.49853e-20
3446	Type of tobacco currently smoked	14608	1.29139	0.0621382	0.240381	0.0277929	0.0199949	0.109543	0.082193	0.0440107	0.108841	0.0390689	0.0941168	0.101532	0.496603	0.432388	0.57559	0.815605	0.795842	0.466092	0.515567	0.417676	0.455423	0.488554	0.417407
137	Number of treatments/medications taken	215938	-0.416585	1e-255	1e-255	1e-255	1e-255	1e-255	1e-255	1e-255	1e-255	1e-255	1e-255	1e-255	1e-255	1e-255	1e-255	1e-255	1e-255	1e-255	1e-255	1e-255	1e-255	1e-255	1e-255
3456	Number of cigarettes currently smoked daily (current cigarette smokers)	14433	-0.50699	4.72249e-13	2.91815e-08	3.04117e-10	2.99388e-13	3.16189e-10	5.7177e-13	3.48358e-11	4.22995e-17	2.05373e-15	5.19354e-15	6.26538e-25	5.87933e-50	1.95726e-36	3.71705e-46	2.84944e-56	1.2175e-37	1.27496e-61	6.28588e-44	3.08366e-70	1.43783e-53	5.21676e-50	8.5893e-49
3466	Time from waking to first cigarette	14514	3.05404	0.00774022	0.00583274	0.0104821	0.000772149	0.00425238	0.0105017	0.0107746	0.0399823	0.0121634	0.00192695	0.00226692	4.15398e-07	4.32922e-08	1.94333e-06	3.7932e-08	2.80303e-06	7.16441e-07	2.47277e-07	5.36109e-05	1.3412e-08	2.30636e-07	6.52449e-08
3476	Difficulty not smoking for 1 day	14514	1.44205	0.00799424	0.0206593	0.00943571	0.00998932	0.0122754	0.00319724	0.00907007	0.0193223	0.0101794	0.00313111	0.0413747	0.0203762	0.116782	0.0297004	0.0209167	0.013429	0.0117378	0.0442515	0.0100578	0.00990464	0.0148373	0.00753434
3486	Ever tried to stop smoking	14608	1.00641	0.15021	0.322848	0.194661	0.487546	0.0428936	0.126752	0.101762	0.423021	0.136021	0.117968	0.158727	0.0157516	0.0202379	0.0203292	0.00560378	0.0047803	0.0303472	0.0149137	0.0112077	0.00849406	0.0249381	0.0176885
3496	Wants to stop smoking	14608	0.563376	9.68048e-05	7.43549e-05	0.000285358	2.65306e-05	0.000361178	0.000149666	5.19592e-05	0.000853554	0.000594622	1.74998e-05	0.00101684	0.0290263	0.0262688	0.0426474	0.0180978	0.00249575	0.0480404	0.0195844	0.0688872	0.0274529	0.0380354	0.0611019
3506	Smoking compared to 10 years previous	14608	0.369227	0.0879922	0.0612398	0.101491	0.152539	0.055047	0.0866327	0.0723671	0.395525	0.131385	0.0683631	0.0599448	0.607651	0.0686905	0.685604	0.825383	0.870075	0.852139	0.76158	0.60802	0.623806	0.500564	0.815225
699	Length of time at current address	215522	-0.112559	3.45081e-54	1.98011e-75	2.50757e-54	2.54135e-60	2.03886e-42	4.32161e-52	3.09087e-56	4.45227e-27	4.9392e-48	4.21612e-52	3.86784e-63	8.17988e-43	6.62534e-64	3.69025e-44	3.84352e-44	1.1014e-19	1.12936e-42	4.2812e-44	1.18849e-19	5.32522e-47	1.21162e-39	4.67347e-51
3526	Mother's age at death	127461	0.190375	4.32922e-32	3.31639e-30	4.47379e-35	1.25957e-27	4.4297e-23	2.11875e-35	3.85652e-31	4.05053e-30	1.39948e-36	4.74806e-38	6.28472e-49	1.02682e-68	1.56875e-63	1.79368e-72	4.05305e-70	4.64425e-55	4.92835e-72	2.31492e-73	6.64033e-65	3.10642e-80	3.45001e-75	1.89869e-67
3536	Age started hormone-replacement therapy (HRT)	76452	0.460849	1	1	1	1	1	1	1	1	1	1	1	5.71015e-236	5.43784e-163	2.02783e-250	9.60075e-232	2.635e-272	1.0585e-248	5.09232e-217	5.38904e-253	1.35739e-231	1.10733e-251	1.56462e-180
3546	Age last used hormone-replacement therapy (HRT)	63563	0.260044	1	1	1	1	1	1	1	1	1	1	1	1.20745e-64	1.66958e-50	7.43058e-71	2.21923e-67	3.2931e-93	2.44321e-61	4.36376e-58	8.50534e-59	4.39253e-58	4.8438e-67	4.63742e-63
709	Number in household	214850	0.0415152	1.00707e-47	1.0567e-36	1.58309e-53	4.56481e-52	2.48908e-49	3.02669e-47	1.48448e-52	7.48723e-51	1.53098e-57	5.86575e-45	1.32795e-63	4.3188e-07	0.00146253	1.17192e-09	2.23175e-05	3.01643e-11	1.46803e-11	0.00179754	2.55921e-06	2.97874e-05	4.93657e-06	2.52039e-18
3571	Back pain for 3+ months	141537	0	1	1	1	1	1	1	1	1	1	1	1	1	1	1	1	1	1	1	1	1	1	1
3581	Age at menopause (last menstrual period)	124235	0.312889	1	1	1	1	1	1	1	1	1	1	1	1.2724e-182	3.70767e-126	9.16065e-197	1.26842e-179	5.08982e-234	1.09451e-204	5.69159e-166	6.32729e-185	6.53446e-186	2.79598e-192	1.24079e-123
3591	Ever had hysterectomy (womb removed)	270682	0	1	1	1	1	1	1	1	1	1	1	1	1	1	1	1	1	1	1	1	1	1	1
3606	Chest pain or discomfort walking normally	87257	0	1	1	1	1	1	1	1	1	1	1	1	1	1	1	1	1	1	1	1	1	1	1
3616	Chest pain due to walking ceases when standing still	32178	0	1	1	1	1	1	1	1	1	1	1	1	1	1	1	1	1	1	1	1	1	1	1
3627	Age angina diagnosed	3734	0.520227	4.3527e-07	2.36817e-06	1.19999e-07	8.34922e-08	1.19884e-09	8.24977e-07	8.39832e-07	4.05423e-07	1.24602e-07	2.8312e-07	5.08984e-09	4.58256e-13	6.71822e-11	3.82541e-13	1.99387e-15	8.99511e-13	2.55564e-13	1.13543e-12	7.92489e-15	8.12177e-10	1.25199e-13	2.13784e-12
3637	Frequency of other exercises in last 4 weeks	106902	0.445872	2.49391e-05	0.00060135	3.27082e-06	1.96744e-05	2.12724e-05	4.56006e-05	6.86822e-05	0.000433135	1.25283e-05	4.41001e-06	0.000183955	0.00183374	0.0019545	0.00177419	0.00184687	0.0057802	0.000663116	0.000583962	0.00752521	0.000798103	0.000921156	0.000287039
3647	Duration of other exercises	106902	0.577707	0.00159863	0.00451964	0.001298	0.00118908	0.00301617	0.00161328	0.00174805	0.0151247	0.000623195	0.000419525	0.00165461	0.000629305	0.00190479	0.000383398	0.000236388	0.00371423	0.000224678	3.54424e-05	0.000973508	5.97572e-06	0.000525822	0.000405896
3659	Year immigrated to UK (United Kingdom)	4100	-0.2433	0.255303	0.0482265	0.210479	0.207616	0.482563	0.229923	0.153319	0.698309	0.0917208	0.400043	0.783308	4.66661e-05	2.09256e-05	3.21124e-05	0.000101672	1.61938e-05	0.000159527	4.19849e-06	0.0121168	3.92283e-06	5.17003e-05	0.000263884
101970	Double crust pastry intake	1085	2.78101	0.0714595	0.0290966	0.0902692	0.0731123	0.0968407	0.0643037	0.0874038	0.196142	0.071296	0.115454	0.203224	0.0872307	0.0223936	0.114045	0.0473344	0.150477	0.13491	0.11118	0.161687	0.134248	0.0747523	0.0993397
3669	Lifetime number of same-sex sexual partners	4905	0.0641797	0.178208	0.166805	0.281697	0.459443	0.0609925	0.125071	0.207327	0.0471566	0.0574853	0.0755291	0.535136	0.234869	0.831019	0.230994	0.144601	0.125966	0.167285	0.242848	0.71429	0.180427	0.196882	0.211239
101980	Single crust pastry intake	1333	0.730307	0.00791888	0.00459567	0.00678941	0.022639	0.0429327	0.0066388	0.0216476	0.00489982	0.00360836	0.0124267	0.0139307	0.070207	0.0848952	0.0735923	0.098571	0.182316	0.0859508	0.0961417	0.0850351	0.0312128	0.0409064	0.0589205
3680	Age when last ate meat	10171	0.172339	0.00344821	0.00514053	0.00561423	0.0306579	0.00652073	0.00149888	0.0247493	0.00287094	3.33324e-05	0.00244008	0.00618482	2.1549e-06	3.97274e-07	2.38977e-06	0.00249345	2.54639e-05	1.41526e-06	1.78034e-08	3.07489e-05	1.08041e-07	1.61809e-06	2.98505e-06
101990	Crumble intake	659	0.643367	0.225562	0.207738	0.164646	0.31617	0.176267	0.299437	0.10997	0.236335	0.431693	0.304443	0.483983	0.474183	0.366705	0.510163	0.652097	0.762772	0.422013	0.749606	0.514518	0.431486	0.486158	0.469777
102000	Pizza intake	1017	0.404915	0.144941	0.206369	0.132379	0.200119	0.157748	0.126085	0.13476	0.326034	0.173115	0.222749	0.0589333	0.174744	0.0411105	0.185922	0.291773	0.140418	0.131869	0.127981	0.189217	0.262365	0.15398	0.339692
3700	Time since last menstrual period	42355	-0.0251037	1	1	1	1	1	1	1	1	1	1	1	0.147654	0.000356552	0.100749	0.408619	0.0402985	0.0757901	0.808888	0.00892346	0.500247	0.0947858	0.133102
102010	Pancake intake	149	-1.32865	0.175153	0.147841	0.0799103	0.22356	0.194123	0.195612	0.124955	0.191798	0.17256	0.142562	0.148652	0.4358	0.0418329	0.54322	0.247711	0.665645	0.398791	0.373918	0.483919	0.600268	0.306276	0.533544
3710	Length of menstrual cycle	36210	-0.00864073	1	1	1	1	1	1	1	1	1	1	1	0.642128	0.776644	0.416248	0.805886	0.396741	0.691682	0.999785	0.185782	0.365474	0.399996	0.873855
102020	Scotch pancake intake	186	2.99514	0.0759751	0.0217412	0.0558299	0.117322	0.0307749	0.116735	0.0677892	0.190915	0.0480524	0.0808037	0.200398	0.0077605	0.016245	0.00935328	0.0094547	0.0373256	0.00790034	0.00810044	0.0199842	0.0151337	0.00910323	0.00239158
3720	Menstruating today	78365	0	1	1	1	1	1	1	1	1	1	1	1	1	1	1	1	1	1	1	1	1	1	1
102030	Yorkshire pudding intake	821	1.48025	0.166059	0.13357	0.237056	0.0741574	0.175024	0.104016	0.147722	0.100785	0.218984	0.182025	0.104466	0.0341249	0.0861234	0.0475698	0.0451713	0.121619	0.022659	0.0443407	0.0515025	0.0176214	0.0366091	0.0504032
3731	Former alcohol drinker	44776	0	1	1	1	1	1	1	1	1	1	1	1	1	1	1	1	1	1	1	1	1	1	1
102040	Indian snacks intake	345	-1.22965	0.284982	0.0897438	0.279483	0.241271	0.347314	0.180234	0.215182	0.158481	0.194677	0.383671	0.337045	0.314773	0.406162	0.336339	0.353494	0.0569791	0.3286	0.194504	0.189556	0.330535	0.434566	0.485095
3741	Stomach/abdominal pain for 3+ months	46466	0	1	1	1	1	1	1	1	1	1	1	1	1	1	1	1	1	1	1	1	1	1	1
102050	Croissant intake	514	-1.10644	0.406047	0.307034	0.359908	0.346431	0.165647	0.361997	0.413832	0.231465	0.361288	0.487129	0.641918	0.0388991	0.0107743	0.0424508	0.112368	0.0515919	0.0344121	0.0236163	0.0583674	0.0199018	0.05505	0.0664925
3751	Chest pain or discomfort when walking uphill or hurrying	69534	0	1	1	1	1	1	1	1	1	1	1	1	1	1	1	1	1	1	1	1	1	1	1
102060	Danish pastry intake	524	2.18934	0.132124	0.0724207	0.15311	0.254639	0.155437	0.117853	0.124103	0.0200358	0.109352	0.319451	0.324126	0.0217983	0.0362849	0.0231938	0.0298536	0.0994333	0.0351402	0.103866	0.000795448	0.0354162	0.0188742	0.0219606
3761	Age hay fever, rhinitis or eczema diagnosed	44842	-0.0184711	0.76924	0.798098	0.706359	0.758726	0.716299	0.847173	0.847729	0.182305	0.533078	0.596759	0.790275	0.292433	0.508541	0.144043	0.329636	0.120581	0.147284	0.249811	0.722768	0.321824	0.143427	0.217413
102070	Scone intake	1276	-0.33251	0.0603182	0.0400629	0.0503162	0.0525137	0.118703	0.0451686	0.0862755	0.123169	0.0170694	0.0538563	0.206846	0.371651	0.48665	0.430116	0.395854	0.344162	0.475701	0.453967	0.180856	0.557624	0.436134	0.490557
3773	Knee pain for 3+ months	119670	0	1	1	1	1	1	1	1	1	1	1	1	1	1	1	1	1	1	1	1	1	1	1
102080	Yogurt/ice-cream consumers	458607	0	1	1	1	1	1	1	1	1	1	1	1	1	1	1	1	1	1	1	1	1	1	1
3786	Age asthma diagnosed	23060	0.0700711	0.865924	0.000229216	0.630738	0.535551	0.749469	0.820692	0.746532	0.869151	0.660128	0.946128	0.958894	0.00659136	0.581834	0.0219131	0.00137078	0.0158179	0.00819699	0.000737985	0.0730248	0.00488504	0.00868101	0.000231356
102090	Yogurt intake	11114	0.216829	0.300321	0.445207	0.164831	0.154861	0.601826	0.292722	0.365043	0.479753	0.0920407	0.345501	0.152888	0.0370005	0.00831704	0.0140488	0.0626309	0.306639	0.0297339	0.0544761	0.0125708	0.00543887	0.0309139	0.00372649
3799	Headaches for 3+ months	108101	0	1	1	1	1	1	1	1	1	1	1	1	1	1	1	1	1	1	1	1	1	1	1
3809	Time since last prostate specific antigen (PSA) test	0	0	0.00609131	0.0121388	0.0165371	0.00012853	0.000561924	0.00852219	0.00474816	0.0190138	0.000923701	0.00228246	0.267356	1	1	1	1	1	1	1	1	1	1	1
102120	Ice-cream intake	3049	-0.300612	0.20046	0.169864	0.127975	0.44261	0.263472	0.227091	0.26926	0.538316	0.132563	0.259355	0.0367589	0.378244	0.440817	0.451497	0.299151	0.249282	0.182625	0.58312	0.269909	0.351323	0.212145	0.196271
102130	Dessert consumers	458607	0	1	1	1	1	1	1	1	1	1	1	1	1	1	1	1	1	1	1	1	1	1	1
3829	Number of stillbirths	67081	-0.16285	1	1	1	1	1	1	1	1	1	1	1	2.76219e-28	5.68116e-28	1.79341e-27	9.9067e-28	1.01281e-27	6.13233e-29	7.72042e-29	6.38619e-23	7.40662e-32	1.0444e-30	8.70135e-29
102140	Milk-based pudding intake	1084	0.420145	0.260158	0.324145	0.19326	0.499239	0.192181	0.315559	0.207443	0.34065	0.271733	0.35875	0.430668	0.128608	0.1325	0.0799066	0.160637	0.102571	0.156921	0.0892192	0.144986	0.11863	0.193695	0.0529107
3839	Number of spontaneous miscarriages	66913	-0.0984705	1	1	1	1	1	1	1	1	1	1	1	2.77159e-11	2.08424e-14	9.89213e-12	7.94182e-16	2.1048e-08	2.62466e-11	3.95366e-13	5.68276e-12	1.90983e-12	4.09309e-13	0.00120579
102150	Other milk-based pudding intake	641	1.06781	0.0374836	0.0251184	0.0800235	0.0547691	0.0234274	0.0401008	0.0440675	0.0351165	0.0232418	0.082923	0.127951	0.26419	0.00855659	0.190367	0.361593	0.299311	0.309613	0.265454	0.28017	0.279806	0.278919	0.449222
3849	Number of pregnancy terminations	66686	0.132802	1	1	1	1	1	1	1	1	1	1	1	3.09313e-19	4.07156e-32	6.64458e-22	1.07936e-20	2.62136e-09	8.88534e-17	8.26857e-23	3.82659e-14	1.20566e-21	3.01963e-20	5.09717e-09
3859	Reason former drinker stopped drinking alcohol	7779	0.843899	0.0469821	0.0404938	0.0428719	0.0402489	0.102469	0.027968	0.0337542	0.0775157	0.0280688	0.0485341	0.0160685	0.00116754	0.0167817	0.0019111	0.000757714	0.00144462	0.000539494	0.00183453	0.000995932	0.00127046	0.000919675	0.0004986
767	Length of working week for main job	114979	0.198159	3.61521e-18	5.3225e-20	8.73708e-22	6.2397e-18	3.23187e-23	3.73736e-18	8.3069e-19	1.96815e-08	2.91171e-21	4.56903e-18	2.08661e-07	7.65785e-75	1.96811e-103	7.19551e-71	9.27801e-77	8.65574e-80	2.85672e-67	1.038e-74	1.61671e-39	1.43887e-66	6.77424e-76	2.77367e-41
102170	Soya dessert intake	207	3.50048	0.0729681	0.0817174	0.103055	0.0176036	0.0440402	0.0736363	0.0392258	0.64495	0.0827343	0.091171	0.0748448	0.345105	0.161675	0.350427	0.526607	0.544376	0.455221	0.330131	0.375095	0.387468	0.361841	0.272931
3872	Age of primiparous women at birth of child	28208	0.227743	1	1	1	1	1	1	1	1	1	1	1	5.65048e-23	4.35416e-16	1.41187e-24	2.94817e-26	2.24663e-23	3.56611e-30	4.19776e-22	6.18317e-17	7.47612e-23	3.55989e-24	2.60629e-30
102180	Fruitcake intake	1283	0.272339	0.610696	0.437336	0.430139	0.576352	0.303254	0.69779	0.723741	0.609659	0.645785	0.754056	0.819915	0.26383	0.397133	0.379776	0.111757	0.479826	0.151751	0.34355	0.208874	0.15515	0.27607	0.177884
3882	Age at bilateral oophorectomy (both ovaries removed)	17165	0.404909	1	1	1	1	1	1	1	1	1	1	1	2.23128e-42	1.01405e-19	2.3824e-43	1.22511e-38	2.06654e-48	6.36095e-42	8.84913e-42	5.59062e-40	5.89193e-39	6.49481e-45	8.99868e-43
102190	Cake intake	3975	0.18273	0.0352082	0.0366915	0.0340803	0.0487534	0.101972	0.02472	0.0616816	0.0524435	0.0245773	0.025447	0.0287874	0.335615	0.157958	0.281788	0.380823	0.519975	0.359064	0.40689	0.429545	0.502167	0.42905	0.40674
3894	Age heart attack diagnosed	1685	0.598718	5.05647e-13	1.20076e-10	4.97602e-13	2.64298e-18	1.36108e-12	1.86907e-13	2.24478e-13	1.14107e-15	3.0459e-11	2.64412e-12	2.3847e-10	2.14619e-07	1.15908e-06	3.997e-07	1.45231e-10	8.5992e-06	7.85007e-07	1.11373e-05	1.68772e-09	2.93761e-05	4.83239e-08	2.06192e-05
102200	Doughnut intake	297	0.524908	0.0620527	0.0860577	0.122837	0.166235	0.0321437	0.0741547	0.0383357	0.406082	0.0772933	0.0949216	0.079557	0.462298	0.179444	0.454229	0.569017	0.848414	0.758906	0.315423	0.567407	0.51565	0.494734	0.183408
102210	Sponge pudding intake	586	0.483644	0.389725	0.423217	0.325628	0.34368	0.279779	0.38292	0.263612	0.344102	0.277052	0.371913	0.387803	0.159033	0.0415706	0.144101	0.283722	0.0722064	0.132985	0.137925	0.114086	0.180365	0.302454	0.0931503
6	Conclusion duration	215919	-0.00399996	0.818191	0.898082	0.846615	0.735473	0.679833	0.478306	0.997843	0.870235	0.843231	0.985685	0.658127	0.62586	0.437802	0.572799	0.875305	0.71856	0.645046	0.47333	0.463921	0.48265	0.565719	0.945499
777	Frequency of travelling from home to job workplace	115645	-0.024956	1.40991e-20	7.92881e-21	5.41269e-21	2.17444e-24	1.29815e-17	1.41696e-19	3.06428e-21	7.74e-17	1.04179e-18	4.43326e-20	2.11045e-40	0.0208702	0.776621	0.00462499	0.00299107	0.127032	0.000497602	0.0193413	0.0211558	0.000601309	0.0163414	3.16969e-12
3912	Adopted father still alive	5692	0	1	1	1	1	1	1	1	1	1	1	1	1	1	1	1	1	1	1	1	1	1	1
102220	Cheesecake intake	677	-1.66933	0.0565028	0.196582	0.0695246	0.0946694	0.121983	0.105036	0.0656373	0.0388942	0.0654753	0.0376137	0.0804801	0.0319186	0.339938	0.019926	0.0157243	0.0167637	0.0231861	0.014587	0.00985848	0.0390941	0.0220876	0.121413
102230	Other dessert intake	2530	0.55097	0.607151	0.422154	0.455774	0.624442	0.758771	0.581278	0.495883	0.699933	0.674845	0.699508	0.321824	0.133319	0.0838319	0.102058	0.153404	0.134855	0.0875526	0.0363307	0.0910843	0.22228	0.105202	0.150968
3942	Adopted mother still alive	6119	0	1	1	1	1	1	1	1	1	1	1	1	1	1	1	1	1	1	1	1	1	1	1
102250	Sweet snack consumers	458607	0	1	1	1	1	1	1	1	1	1	1	1	1	1	1	1	1	1	1	1	1	1	1
102260	Chocolate bar intake	2174	0.651778	0.0241444	0.0675137	0.0231687	0.0588055	0.0350978	0.0351226	0.0107037	0.0920418	0.0501438	0.0271665	0.101639	0.00294899	0.00368801	0.00273746	0.00877283	0.000809482	0.00218155	0.0111853	0.0380269	0.00531591	0.00269161	0.00120793
102270	White chocolate intake	153	-0.822727	0.0504331	0.0381199	0.0782003	0.0590151	0.131995	0.0314272	0.0676809	0.0755865	0.0490387	0.0812028	0.116454	0.220261	0.114077	0.173814	0.158054	0.451321	0.221428	0.274887	0.163274	0.137574	0.232039	0.193039
3972	Number of adopted brothers	2498	-0.0510489	0.468882	0.496168	0.474833	0.423674	0.305049	0.441774	0.516409	0.886486	0.455394	0.333557	0.730157	0.527392	0.314815	0.527535	0.26412	0.238083	0.574807	0.579088	0.8156	0.759931	0.38735	0.514199
102280	Milk chocolate intake	2077	0.389336	0.257083	0.0598452	0.138318	0.314052	0.274157	0.224035	0.286317	0.139541	0.0947081	0.170182	0.133825	0.0807961	0.0622575	0.0860693	0.0501987	0.0449998	0.123331	0.0463275	0.10487	0.0790891	0.0779298	0.0249069
3982	Number of adopted sisters	2519	-0.0822398	0.775617	0.900197	0.688759	0.571334	0.857512	0.736978	0.611097	0.766387	0.765449	0.668337	0.697361	0.307467	0.245187	0.299218	0.199785	0.0772206	0.308027	0.241574	0.714212	0.25878	0.229679	0.204731
102290	Dark chocolate intake	1619	0.642613	0.0881955	0.0522275	0.063104	0.0702833	0.163302	0.0813706	0.0640897	0.233246	0.0999981	0.0719426	0.166394	0.0174248	0.0481365	0.0136958	0.0189855	0.00345993	0.00966098	0.011953	0.0208253	0.0340031	0.0146712	0.0238996
3992	Age emphysema/chronic bronchitis diagnosed	2510	-0.174592	0.000117953	0.0282468	6.64176e-05	8.29265e-05	9.24016e-05	0.000153154	6.31791e-05	4.87936e-06	0.00102237	0.000130976	1.73997e-08	0.0427522	0.292024	0.0634075	0.211329	0.0186258	0.0388295	0.156825	0.00386931	0.0269519	0.0556956	0.00745829
102300	Chocolate-covered raisin intake	296	-1.57907	0.294396	0.206881	0.179567	0.201289	0.594345	0.273467	0.467786	0.400137	0.34417	0.555654	0.279242	0.0217853	0.0371206	0.0306868	0.0781012	0.0345935	0.0787589	0.00462786	0.0152602	0.0212003	0.0210928	0.0735637
102310	Chocolate sweet intake	1790	0.657225	0.122067	0.221205	0.109577	0.0983063	0.128931	0.125172	0.0888559	0.120962	0.0703367	0.189278	0.359273	0.217152	0.199357	0.199762	0.353472	0.427406	0.234733	0.22264	0.290911	0.126636	0.216245	0.262075
4012	Age deep-vein thrombosis (DVT, blood clot in leg) diagnosed	4386	-0.143877	0.430033	0.214401	0.261814	0.303332	0.447846	0.314211	0.329452	0.676955	0.268493	0.277214	0.550954	0.0249475	0.000365723	0.0308845	0.199723	0.00656036	0.0208864	0.0277739	0.144275	0.0242624	0.0393046	0.00426177
102320	Diet sweets intake	262	-1.12455	0.240481	0.136843	0.283062	0.0697984	0.162022	0.175152	0.259187	0.31165	0.0892791	0.122089	0.219616	0.422329	0.298007	0.543856	0.361036	0.477882	0.431547	0.421804	0.555706	0.414667	0.306146	0.441435
4022	Age pulmonary embolism (blood clot in lung) diagnosed	1743	0.132973	0.257424	0.450769	0.322819	0.380808	0.163082	0.260544	0.202878	0.207034	0.382257	0.271866	0.185264	0.201336	0.920306	0.233171	0.00632699	0.506821	0.135195	0.156998	0.114877	0.260245	0.210322	0.846129
102330	Sweets intake	1930	-0.312731	0.132258	0.130209	0.224373	0.0737503	0.227221	0.15355	0.179261	0.0802482	0.119988	0.119867	0.0297618	0.28166	0.207541	0.324132	0.242698	0.191685	0.215447	0.322199	0.41135	0.275748	0.36209	0.231883
102340	Chocolate-covered biscuits intake	2210	-1.33041	0.00386012	0.00188564	0.00270449	0.00377798	0.00714254	0.00137629	0.00821231	0.0554852	0.00479428	0.012475	0.00408527	0.328438	0.296893	0.268252	0.43285	0.241169	0.344589	0.288742	0.506168	0.348707	0.297157	0.368508
4041	Gestational diabetes only	10696	0	1	1	1	1	1	1	1	1	1	1	1	1	1	1	1	1	1	1	1	1	1	1
102350	Chocolate biscuits intake	2730	0.782783	0.00616708	0.0202161	0.00152402	0.00575398	0.0137809	0.00866625	0.00393624	0.0101471	0.0140376	0.00767956	0.0298137	0.115826	0.0513297	0.143888	0.187344	0.360086	0.0845366	0.235414	0.0732113	0.211032	0.118659	0.13684
4056	Age stroke diagnosed	2336	0.551672	1.217e-09	2.44133e-08	2.5535e-10	5.79605e-12	1.37033e-06	1.44186e-09	2.08227e-10	4.00274e-09	9.36941e-10	5.15044e-09	1.43956e-09	2.85333e-09	1.38349e-09	1.71834e-09	1.03639e-10	2.40817e-08	2.91576e-09	4.69841e-10	6.7403e-07	4.01273e-06	1.44618e-08	3.4274e-09
102360	Sweet biscuits intake	5596	-0.20211	0.357373	0.436233	0.504146	0.287607	0.312695	0.370296	0.334198	0.0949049	0.4231	0.483929	0.256066	0.0803439	0.162695	0.0602779	0.118277	0.182513	0.0945472	0.176554	0.0316352	0.0670783	0.0918721	0.00714504
102370	Cereal bar intake	1976	-1.29763	0.0187004	0.0422818	0.0374198	0.00375375	0.0125457	0.0188034	0.0452264	0.000900953	0.0183338	0.0447139	0.0335192	0.0680245	0.0226367	0.0754962	0.0622208	0.223819	0.0483746	0.0435425	0.0979529	0.11294	0.0859926	0.0918278
4067	Facial pains for 3+ months	9930	0	1	1	1	1	1	1	1	1	1	1	1	1	1	1	1	1	1	1	1	1	1	1
102380	Other sweets intake	678	-0.521947	0.177727	0.205053	0.292831	0.146829	0.180552	0.141668	0.16607	0.117337	0.204979	0.061453	0.293093	0.302397	0.284243	0.484863	0.230091	0.22084	0.381763	0.365193	0.456244	0.266229	0.329299	0.218526
4079	Diastolic blood pressure, automated reading	203126	-0.281788	0.230762	0.529884	0.258315	0.64567	2.53799e-137	0.131011	0.521452	0.534666	0.732828	0.689251	0.298072	2.16786e-243	1.12595e-305	1.71307e-247	1.6008e-304	2.57517e-60	1.95076e-248	4.89159e-282	1.15798e-257	7.88404e-250	2.34829e-235	3.25338e-264
4080	Systolic blood pressure, automated reading	203124	-1.05801	1e-255	1e-255	1e-255	1e-255	1.39656e-07	1e-255	1e-255	1e-255	1e-255	1e-255	1e-255	1e-255	1e-255	1e-255	1e-255	2.50029e-84	1e-255	1e-255	1e-255	1e-255	1e-255	1e-255
4081	Method of measuring blood pressure	215938	-1.09245	0.153181	0.156555	0.0815629	0.0991769	0.0722578	0.142325	0.135216	0.0802567	0.277571	0.0855905	0.0993611	0.0453445	0.0271346	0.00462857	0.105702	0.00385293	0.0272046	0.0364559	0.0132867	0.0319687	0.0558738	0.0297154
4092	Heel ultrasound method (left)	69280	-0.564874	1.68864e-14	4.54746e-18	3.06694e-09	8.81189e-11	4.90228e-12	1.2285e-12	3.50098e-19	1.36782e-14	1.57407e-13	2.69032e-14	1.59935e-15	2.29001e-07	7.40592e-10	4.01668e-06	3.15668e-06	2.30407e-06	2.64356e-07	5.48575e-10	6.376e-07	4.71525e-08	1.05362e-07	2.64993e-06
4093	Fractured heel (left)	224539	0	1	1	1	1	1	1	1	1	1	1	1	1	1	1	1	1	1	1	1	1	1	1
4095	Heel ultrasound method (right)	69280	-0.579527	9.03365e-16	6.23351e-20	7.23793e-11	6.98349e-12	6.37349e-14	5.5568e-14	6.0211e-19	4.94096e-14	5.95574e-14	2.53779e-16	4.97979e-16	8.57075e-08	1.3505e-09	5.43158e-07	1.28673e-06	2.78838e-06	5.12004e-08	8.64076e-11	2.13775e-06	2.54969e-08	1.83077e-08	8.52364e-07
4096	Fractured heel (right)	224865	0	1	1	1	1	1	1	1	1	1	1	1	1	1	1	1	1	1	1	1	1	1	1
102400	Savoury snack consumers	458607	0	1	1	1	1	1	1	1	1	1	1	1	1	1	1	1	1	1	1	1	1	1	1
4100	Ankle spacing width (left)	66376	0.0299113	0.0234475	0.000328359	8.53222e-14	0.000899921	0.0148706	0.00548762	0.110737	0.00101009	0.00195058	0.0217171	0.0946433	0.0419797	0.0439	0.291027	0.00576313	0.356649	0.0011638	0.0140354	0.000769756	0.149844	0.000237102	0.00259141
4101	Heel broadband ultrasound attenuation (left)	66375	0.0930737	8.7868e-23	7.83188e-20	1.80948e-19	2.79798e-29	1.15849e-24	1.12868e-23	8.83224e-32	1.6048e-26	2.03394e-13	2.56819e-24	9.43499e-29	2.44784e-10	3.10635e-07	6.07791e-06	4.84233e-16	1.67251e-13	3.41991e-08	9.84583e-06	9.62723e-07	8.87907e-11	1.78679e-08	4.83857e-11
4103	Speed of sound through heel (left)	66376	0.0868958	6.24211e-20	8.24033e-15	4.87757e-15	1.56223e-24	8.35558e-24	6.26683e-21	2.07449e-28	1.54147e-25	1.23587e-11	3.4601e-20	6.64856e-26	3.44449e-09	0.0321099	2.85191e-06	9.76207e-13	5.77201e-16	3.98437e-08	0.000460414	1.06036e-07	9.85482e-10	1.28604e-05	2.36819e-08
4104	Heel quantitative ultrasound index (QUI), direct entry (left)	66376	0.0928598	7.12836e-22	3.09222e-17	2.81392e-17	2.35801e-27	3.45353e-25	7.12806e-23	6.41032e-31	4.85222e-27	8.30874e-13	1.32415e-22	3.9481e-28	2.70969e-10	0.000807435	1.37508e-06	7.11591e-15	3.29559e-16	9.78244e-09	6.27682e-05	7.09297e-08	7.87443e-11	5.05826e-07	5.982e-10
4105	Heel bone mineral density (BMD) (left)	66365	0.0943021	1.97953e-21	1.19026e-16	4.9966e-17	7.39678e-27	7.08821e-25	1.96997e-22	1.5627e-30	2.12906e-26	1.38536e-12	2.69641e-22	1.28181e-27	1.43279e-10	0.000618283	7.40424e-07	2.67653e-15	1.82087e-16	5.43246e-09	4.28953e-05	4.92653e-08	4.23108e-11	3.14731e-07	3.86833e-10
102410	Salted peanuts intake	789	-0.213154	0.128527	0.139961	0.168535	0.117079	0.0720438	0.229932	0.0723056	0.13549	0.182872	0.102448	0.169287	0.457194	0.523005	0.410453	0.838392	0.316806	0.363025	0.417788	0.145521	0.60744	0.350788	0.482289
4106	Heel bone mineral density (BMD) T-score, automated (left)	66376	0.0928557	7.11608e-22	3.08756e-17	2.80813e-17	2.35597e-27	3.44742e-25	7.11859e-23	6.39886e-31	4.84608e-27	8.29725e-13	1.32171e-22	3.94075e-28	2.71455e-10	0.000808852	1.37717e-06	7.12355e-15	3.29438e-16	9.80002e-09	6.28606e-05	7.105e-08	7.88967e-11	5.06667e-07	5.99089e-10
102420	Unsalted peanuts intake	196	4.28564	0.529989	0.530137	0.516874	0.341767	0.466316	0.498175	0.523017	0.746021	0.172879	0.503678	0.284358	0.041813	0.115363	0.0371088	0.0450683	0.032023	0.0459115	0.0825444	0.016101	0.0499708	0.0306495	0.0911164
4119	Ankle spacing width (right)	66372	0.0259996	0.0387046	0.000455698	2.43333e-12	0.00153835	0.0334957	0.00843499	0.0504875	0.000529226	0.00238182	0.0213064	0.193056	0.0771413	0.101013	0.444286	0.0131548	0.376731	0.00386042	0.0228793	0.00203846	0.0850249	0.000569952	0.00615406
4120	Heel broadband ultrasound attenuation (right)	66371	0.120141	2.19491e-29	4.33798e-25	1.26133e-25	1.02579e-34	4.20507e-33	1.48145e-29	5.809e-38	2.73242e-34	3.31329e-16	1.86054e-30	6.24872e-37	3.09504e-16	1.09629e-13	1.21508e-10	5.63558e-21	1.84728e-21	1.69431e-13	4.54213e-10	1.1361e-10	6.51773e-17	1.5251e-13	8.52418e-16
4122	Speed of sound through heel (right)	66372	0.0960807	2.3128e-25	1.08314e-18	6.2747e-19	2.37031e-29	3.74228e-31	8.12156e-26	1.95675e-35	7.95568e-33	2.46946e-14	2.28928e-24	5.86662e-31	6.45535e-11	0.00183245	1.10266e-07	8.4615e-14	4.06936e-20	7.68882e-10	1.77213e-05	9.3732e-09	3.70188e-12	5.03806e-07	3.89269e-09
4123	Heel quantitative ultrasound index (QUI), direct entry (right)	66372	0.108262	7.04093e-28	1.16452e-21	4.84888e-22	1.66682e-32	3.28847e-33	3.05919e-28	7.22469e-38	8.95029e-35	1.37472e-15	1.61193e-27	1.84985e-34	1.82066e-13	1.65837e-06	3.50112e-09	3.37205e-17	5.83959e-22	9.5162e-12	2.61452e-07	5.41436e-10	1.25633e-14	1.35484e-09	5.84294e-12
4124	Heel bone mineral density (BMD) (right)	66359	0.107732	5.35963e-28	9.13036e-22	2.54211e-22	6.14607e-33	2.45811e-33	2.90819e-28	4.7558e-38	4.58137e-35	1.38186e-15	7.11253e-28	2.29773e-34	2.38895e-13	1.76019e-06	4.65011e-09	5.56159e-17	6.33715e-22	1.11103e-11	3.11849e-07	6.53383e-10	1.92737e-14	1.52738e-09	9.3585e-12
4125	Heel bone mineral density (BMD) T-score, automated (right)	66372	0.108262	7.04908e-28	1.16534e-21	4.85618e-22	1.66602e-32	3.29412e-33	3.0645e-28	7.22929e-38	8.9634e-35	1.37648e-15	1.61337e-27	1.8543e-34	1.821e-13	1.65872e-06	3.50214e-09	3.37455e-17	5.8425e-22	9.52208e-12	2.61386e-07	5.41199e-10	1.25675e-14	1.35528e-09	5.84453e-12
102430	Salted nuts intake	661	-0.469828	0.037321	0.0219722	0.0421751	0.0474547	0.0674578	0.0729781	0.0466745	0.00572334	0.0448187	0.0553544	0.169249	0.356172	0.585042	0.321217	0.265216	0.184814	0.240845	0.312715	0.0624935	0.193179	0.2726	0.272368
4136	Arterial pulse-wave stiffness device ID	41634	0	1	1	1	1	1	1	1	1	1	1	1	1	1	1	1	1	1	1	1	1	1	1
102440	Unsalted nuts intake	2240	0.216648	0.698212	0.522194	0.559332	0.312879	0.307209	0.679353	0.640326	0.758668	0.829403	0.485352	0.802779	0.634594	0.423662	0.56449	0.326657	0.619594	0.445641	0.630908	0.673763	0.53628	0.488473	0.355626
4138	Heel bone mineral density (BMD) T-score, manual entry (left)	493	0.120998	0.335953	0.602395	0.439211	0.149809	0.259084	0.230489	0.318194	0.638228	0.576525	0.607553	0.224692	0.481446	0.245126	0.463511	0.479399	0.583667	0.723458	0.255982	0.376966	0.313445	0.502457	0.87436
4139	Heel quantitative ultrasound index (QUI), manual entry (left)	493	0.195848	0.289227	0.134568	0.556288	0.0945871	0.155261	0.165627	0.254276	0.264009	0.472256	0.35032	0.328154	0.254314	0.864834	0.26706	0.18033	0.101253	0.129344	0.41812	0.336847	0.384573	0.370722	0.321399
4140	Heel bone mineral density (BMD), manual entry (left)	493	0.160059	0.301608	0.139476	0.593836	0.0949197	0.165749	0.173867	0.267952	0.254406	0.497468	0.363327	0.326383	0.351637	0.876383	0.359552	0.236943	0.134878	0.181726	0.554853	0.55717	0.479882	0.489414	0.433654
4141	Heel broadband ultrasound attenuation (BUA), manual entry (left)	493	0.119019	0.25963	0.16038	0.624343	0.0751336	0.148584	0.162729	0.175375	0.177789	0.490007	0.284775	0.246235	0.488649	0.942204	0.565674	0.444032	0.388831	0.280337	0.668673	0.649593	0.76575	0.592684	0.387111
4142	Speed of sound through heel, manual entry (left)	493	-0.263549	0.219327	0.125077	0.53	0.050674	0.11803	0.117409	0.168354	0.131039	0.430846	0.282999	0.232953	0.12483	0.106504	0.116129	0.110175	0.422334	0.165316	0.046693	0.0452133	0.219945	0.0854457	0.34931
4143	Heel bone mineral density (BMD) T-score, manual entry (right)	501	0.0856857	0.596711	0.434003	0.849249	0.43952	0.532661	0.45065	0.66488	0.922462	0.602484	0.867848	0.578197	0.610117	0.549868	0.579092	0.911971	0.70277	0.774936	0.32172	0.378307	0.653558	0.611734	0.801179
4144	Heel quantitative ultrasound index (QUI), manual entry (right)	501	0.227037	0.88128	0.610803	0.805336	0.374886	0.628194	0.653068	0.750365	0.953544	0.964288	0.911059	0.518364	0.176331	0.892682	0.157504	0.066629	0.0875231	0.105645	0.417272	0.172071	0.442296	0.237468	0.287164
4145	Heel bone mineral density (BMD), manual entry (right)	501	0.194711	0.795701	0.551688	0.876464	0.320382	0.531202	0.592005	0.665697	0.974448	0.89648	0.782605	0.446972	0.246319	0.986573	0.236854	0.0875181	0.0758427	0.171003	0.51756	0.281863	0.549096	0.354217	0.345523
102450	Seeds intake	1121	-1.12971	0.465884	0.834523	0.522122	0.624087	0.394852	0.698274	0.344569	0.131742	0.514952	0.298302	0.452944	0.205876	0.163943	0.244397	0.526292	0.107816	0.214036	0.157943	0.142887	0.140703	0.267423	0.217316
4146	Heel broadband ultrasound attenuation (BUA), manual entry (right)	501	0.167005	0.34849	0.280828	0.634255	0.095253	0.198743	0.228002	0.21857	0.64916	0.464442	0.309133	0.121788	0.320129	0.83153	0.356584	0.133479	0.223721	0.236104	0.597116	0.326022	0.845716	0.38089	0.239634
4147	Speed of sound through heel, manual entry (right)	501	0.0245765	0.617307	0.428429	0.955246	0.226721	0.411934	0.431117	0.459629	0.757076	0.754245	0.636688	0.324739	0.883736	0.523857	0.88053	0.765554	0.378544	0.865567	0.953112	0.985388	0.789347	0.980115	0.956994
102460	Crisp intake	5229	0.391327	0.217037	0.134935	0.100612	0.0558778	0.399839	0.172233	0.209202	0.459229	0.214253	0.202558	0.0289469	0.00140002	0.00135632	0.000593082	0.00261286	0.000145618	0.00153956	0.00886369	0.00232081	0.000540474	0.00106486	0.0001165
102470	Savoury biscuits intake	348	0.70621	0.116952	0.0978885	0.198638	0.0878437	0.018901	0.138148	0.137656	0.0278516	0.215968	0.169406	0.386689	0.389236	0.500182	0.520299	0.692493	0.490436	0.395499	0.282961	0.539992	0.284178	0.292596	0.407241
102480	Cheesy biscuits intake	392	-1.25918	0.393094	0.268539	0.274236	0.333889	0.531186	0.314257	0.523899	0.513364	0.589812	0.235848	0.17003	0.121685	0.163852	0.105432	0.204475	0.191591	0.107612	0.0478065	0.141728	0.114776	0.123229	0.186922
102490	Olives intake	1018	0.970059	0.356633	0.541208	0.299305	0.452645	0.195773	0.365956	0.402234	0.42034	0.571548	0.155438	0.397164	0.142923	0.0938869	0.114509	0.687969	0.143631	0.242147	0.122613	0.0606582	0.0591961	0.223661	0.154027
4186	Stiffness method	69373	-0.143542	0.220214	0.23674	0.194759	0.113563	0.240156	0.129758	0.349505	0.199668	0.378082	0.134162	0.189787	0.405376	0.328923	0.184565	0.572217	0.396112	0.330759	0.265983	0.252765	0.315685	0.325945	0.236381
4194	Pulse rate	68220	-0.0823336	0.0556916	0.132621	0.0849406	0.0379888	0.00162778	0.232734	0.0162683	0.0977992	0.103815	0.0324639	0.000712754	1.46205e-08	5.15741e-11	3.79868e-08	1.6e-09	0.641498	7.73916e-09	1.06368e-07	1.85246e-08	6.17456e-07	6.82252e-07	2.34068e-11
4195	Pulse wave reflection index	68220	-0.0199039	0.664428	0.548355	0.205097	0.281679	0.486933	0.87316	0.949067	0.834988	0.686228	0.593672	0.791825	0.170819	0.588635	0.591944	0.220892	2.43978e-07	0.391752	0.545054	0.0100786	0.0662751	0.0863608	0.126465
4196	Pulse wave peak to peak time	68196	0.108448	0.060884	9.54324e-06	1.17028e-05	0.0130144	0.689572	0.0954915	0.29027	0.881244	0.568559	0.10939	0.113295	8.50914e-14	1.70297e-08	2.28436e-11	2.31899e-10	1.56314e-30	1.06391e-12	3.96137e-11	1.69554e-19	2.2741e-16	1.39232e-16	4.4141e-16
102500	Other savoury snack intake	827	-1.72134	0.101151	0.268894	0.0865905	0.2174	0.134403	0.123225	0.0857006	0.080269	0.119171	0.200268	0.0807646	0.131422	0.143276	0.144729	0.383548	0.175089	0.100121	0.15976	0.0969812	0.141688	0.17823	0.103405
4198	Position of the pulse wave peak	68220	-0.314389	3.94012e-31	1.34202e-18	8.161e-25	1.2856e-29	1.15025e-18	2.74059e-35	1.60951e-37	9.15863e-41	1.1247e-35	7.1172e-37	2.4088e-47	3.9339e-104	1.01288e-79	1.18565e-97	1.42403e-104	1.50159e-73	6.47582e-104	1.73784e-107	3.54011e-124	2.78976e-112	1.47561e-111	9.52674e-117
4199	Position of pulse wave notch	68220	-0.0322657	1.50368e-09	4.83591e-10	1.86451e-09	8.208e-09	1.25931e-09	1.36344e-08	2.40169e-10	4.33794e-08	1.3231e-07	3.12438e-10	5.21702e-15	0.0264047	0.0205957	0.0201294	0.00564336	0.000252843	0.0220437	0.0014561	0.116345	0.168804	0.171755	0.00446724
4200	Position of the shoulder on the pulse waveform	68220	-0.199058	8.16716e-16	2.21316e-06	1.47797e-07	6.13771e-14	4.71088e-17	5.26735e-18	1.59031e-21	3.11901e-22	2.71815e-19	9.94323e-19	6.64436e-27	9.29614e-43	5.86613e-27	3.72679e-38	1.69977e-38	1.03344e-45	3.46992e-42	2.12482e-42	3.39211e-54	1.77642e-48	2.09732e-45	1.36424e-49
4204	Absence of notch position in the pulse waveform	68220	-0.882087	9.37903e-117	7.88067e-106	9.19774e-117	6.57051e-118	3.23768e-56	8.23515e-125	1.32609e-124	5.39797e-129	7.74587e-115	1.08683e-125	4.79606e-144	9.91116e-121	1.31364e-112	7.88104e-120	1.60981e-118	1.84847e-57	4.39084e-135	2.1943e-124	1.45739e-131	3.62296e-136	1.01315e-130	8.04555e-131
4205	Pulse wave pressure versus time response curve	229136	0	1	1	1	1	1	1	1	1	1	1	1	1	1	1	1	1	1	1	1	1	1	1
4206	Arterial stiffness device ID	233009	0	1	1	1	1	1	1	1	1	1	1	1	1	1	1	1	1	1	1	1	1	1	1
4207	Pulse wave velocity (manual entry)	68	-0.00896313	0.285994	0.427209	0.164867	0.220986	0.371374	0.30145	0.341085	0.0734281	0.190837	0.629215	0.682713	0.986641	0.478627	0.975664	0.890079	0.309958	0.962695	0.892392	0.746171	0.937734	0.871036	0.672385
102520	Soup consumers	458607	0	1	1	1	1	1	1	1	1	1	1	1	1	1	1	1	1	1	1	1	1	1	1
102530	Powdered/instant soup intake	703	-3.70067	0.177464	0.148645	0.171949	0.26365	0.282347	0.163294	0.160301	0.451551	0.121152	0.0740462	0.189891	0.0863084	0.171102	0.115829	0.176977	0.170119	0.11411	0.0656766	0.154686	0.0730548	0.0635872	0.0426203
4229	Triplet played (left)	3390048	0	1	1	1	1	1	1	1	1	1	1	1	1	1	1	1	1	1	1	1	1	1	1
4230	Signal-to-noise-ratio (SNR) of triplet (left)	67507	-0.205742	6.83169e-34	1.31993e-30	9.21375e-31	4.12419e-36	5.76839e-40	9.99936e-34	1.88091e-40	1.72002e-18	4.16622e-33	1.40469e-35	3.78522e-44	2.77572e-45	1.802e-34	7.01029e-42	5.97702e-48	9.71272e-59	6.56501e-44	8.32281e-50	2.49207e-23	4.71643e-55	5.13037e-45	2.77041e-49
4232	Triplet correct (left)	3384040	0	1	1	1	1	1	1	1	1	1	1	1	1	1	1	1	1	1	1	1	1	1	1
4233	Mean signal-to-noise ratio (SNR), (left)	66461	-0.216741	2.30072e-35	1.93045e-28	3.21116e-33	1.31765e-37	5.15001e-40	1.1722e-34	3.57186e-37	2.63867e-21	1.43496e-35	2.70135e-37	4.75484e-45	2.23172e-49	2.17493e-37	2.31785e-46	6.94966e-48	3.76083e-57	9.00527e-50	8.62434e-50	7.2646e-29	1.04144e-54	2.96049e-48	6.4878e-53
4234	Time to press first digit (left)	67446	-0.183042	1.86635e-36	1.4776e-38	1.75316e-39	2.30639e-39	8.07554e-38	1.22907e-36	1.59589e-35	1.36655e-08	1.07228e-36	1.09116e-35	2.22975e-50	3.62006e-36	1.49306e-41	2.94563e-35	1.97313e-38	4.19519e-38	8.377e-37	8.48244e-38	1.66917e-09	1.93985e-39	8.53082e-35	3.29626e-42
4235	Time to press last digit (left)	67446	-0.215603	1.54091e-42	2.1551e-46	5.49591e-45	3.98749e-44	2.17842e-45	4.92341e-43	9.55935e-44	1.64552e-10	2.19167e-42	3.00568e-43	1.48397e-52	1.58922e-49	3.17354e-60	5.09259e-48	1.20504e-52	2.08696e-52	6.0423e-51	2.68145e-55	1.45478e-09	1.52378e-52	1.83733e-48	1.83892e-58
102540	Canned soup intake	1386	0.243252	0.108337	0.157751	0.109901	0.161407	0.0736165	0.123791	0.143063	0.26135	0.0602412	0.235264	0.0712938	0.463652	0.716746	0.445483	0.698013	0.445904	0.529098	0.638397	0.410111	0.196135	0.426549	0.623206
4236	Triplet entered (left)	3384311	0	1	1	1	1	1	1	1	1	1	1	1	1	1	1	1	1	1	1	1	1	1	1
4238	Keystroke history (left)	3388045	0	1	1	1	1	1	1	1	1	1	1	1	1	1	1	1	1	1	1	1	1	1	1
4239	Number of times 'clear' was pressed (left)	67507	-0.0887326	8.76011e-10	1.56218e-10	1.01444e-09	2.63035e-09	1.41814e-10	1.06235e-09	8.11626e-10	1.89256e-05	2.83434e-10	3.90855e-09	6.76062e-11	1.15103e-09	3.2497e-08	2.88667e-09	9.14105e-11	1.45353e-11	2.57389e-10	4.76846e-11	0.00244831	2.70746e-09	2.65275e-08	4.52427e-12
4240	Triplet played (right)	3390702	0	1	1	1	1	1	1	1	1	1	1	1	1	1	1	1	1	1	1	1	1	1	1
4241	Signal-to-noise-ratio (SNR) of triplet (right)	67459	-0.202536	2.20387e-45	9.72237e-39	9.34931e-43	6.40389e-45	4.96804e-49	1.1331e-44	6.42374e-55	1.62204e-24	2.84162e-43	4.21542e-46	5.59989e-61	5.37695e-44	2.35069e-33	6.52297e-42	8.20905e-48	2.11609e-55	2.64622e-43	6.61391e-48	4.89382e-21	5.18123e-52	3.54821e-46	2.3512e-46
4242	Triplet entered (right)	3384927	0	1	1	1	1	1	1	1	1	1	1	1	1	1	1	1	1	1	1	1	1	1	1
4243	Triplet correct (right)	3384608	0	1	1	1	1	1	1	1	1	1	1	1	1	1	1	1	1	1	1	1	1	1	1
4244	Mean signal-to-noise ratio (SNR), (right)	66412	-0.198459	3.39945e-45	2.06135e-36	5.56502e-43	5.49622e-44	2.15152e-48	8.88599e-45	2.85693e-49	3.02749e-26	1.1804e-44	6.49541e-47	4.70803e-56	9.5209e-42	2.71285e-30	2.68499e-39	1.14738e-42	1.87803e-50	3.1175e-42	1.0258e-41	9.27006e-22	1.36088e-46	1.57404e-43	2.27979e-42
4237	Time to press 'next' (left)	67446	-0.251927	3.35123e-66	2.91551e-72	2.25849e-71	2.98723e-70	1.54405e-72	2.26629e-67	2.38642e-66	2.98525e-12	3.9912e-66	1.7677e-69	1.0064e-87	5.38628e-67	6.07873e-82	4.55322e-65	8.54774e-70	8.41087e-71	1.21788e-68	1.10238e-72	5.26455e-14	1.72182e-72	2.23272e-65	2.06215e-77
4245	Time to press first digit (right)	67392	-0.144468	2.71616e-39	1.18642e-40	1.89087e-43	6.50447e-42	8.7564e-37	6.35505e-40	1.84782e-40	1.39353e-08	7.47556e-40	6.06157e-40	3.63179e-55	3.58795e-23	2.47185e-27	1.08793e-23	1.95933e-22	1.08192e-24	1.69333e-24	1.673e-24	6.77259e-06	3.66355e-25	8.22258e-22	1.33616e-25
4247	Time to press 'next' (right)	67392	-0.272216	2.00708e-86	7.36121e-94	2.12238e-91	1.1647e-89	9.26095e-85	8.46826e-90	1.92118e-89	9.45279e-20	3.48384e-89	1.88454e-88	6.29023e-118	4.98462e-78	7.5378e-93	1.21771e-78	1.56485e-79	6.12332e-82	2.88155e-78	1.0577e-81	4.20381e-20	3.65473e-82	1.02557e-75	1.1622e-83
4248	Keystroke history (right)	3388688	0	1	1	1	1	1	1	1	1	1	1	1	1	1	1	1	1	1	1	1	1	1	1
4249	Number of times 'clear' was pressed (right)	67459	-0.0804811	0.000103902	3.12115e-05	1.22987e-05	0.000102517	0.00010071	0.000101218	0.000337956	0.226522	4.86847e-05	2.12676e-05	2.31466e-07	3.30006e-08	2.31621e-07	1.38144e-08	2.33557e-08	2.60279e-11	2.15016e-09	1.47367e-08	0.000222529	1.35799e-07	2.00718e-07	1.83153e-08
4250	Number of digits to be memorised/recalled	22763	0.413144	5.72979e-44	6.58722e-38	2.7037e-45	2.3145e-42	5.77802e-43	7.45381e-45	7.54699e-47	1.18944e-21	6.00945e-44	6.66094e-46	6.57714e-57	3.08559e-60	2.34034e-46	2.67316e-61	2.11234e-70	4.27176e-66	8.43983e-62	3.34921e-63	3.22106e-32	2.12566e-62	5.93331e-63	1.04693e-72
4251	Target number to be memorised	22763	0.0285052	0.00438971	0.00443423	0.0155134	0.00423332	0.014554	0.00348815	0.00383233	0.00432007	0.017061	0.00702912	0.000563672	0.260071	0.707502	0.217494	0.145423	0.23493	0.270855	0.19155	0.299435	0.340688	0.286787	0.0778186
4252	Target number to be entered	662127	0	1	1	1	1	1	1	1	1	1	1	1	1	1	1	1	1	1	1	1	1	1	1
4253	Time number displayed for	22763	0.41253	2.52591e-41	1.95414e-35	4.15088e-42	3.5929e-40	1.23645e-40	4.13463e-42	5.22122e-44	1.33459e-20	3.56283e-41	2.6275e-43	9.14913e-53	4.61234e-60	2.1312e-46	4.44052e-61	3.21347e-70	7.82663e-66	1.19285e-61	5.86728e-63	1.55449e-32	5.55428e-62	8.89226e-63	3.74688e-72
4254	Time first key touched	22760	-0.373733	3.17625e-36	1.1758e-37	1.44756e-38	3.32536e-38	6.62036e-39	5.70728e-38	4.59429e-40	7.22354e-08	1.62764e-37	1.05609e-38	7.49423e-43	1.45156e-49	2.79087e-45	1.63489e-46	1.21113e-55	4.59977e-60	3.40637e-53	4.24176e-52	1.93212e-13	2.81507e-56	1.13041e-50	5.47024e-57
4255	Time last key touched	22760	-0.2774	8.99097e-29	2.87282e-31	1.94273e-30	1.94508e-30	1.67942e-31	1.92341e-30	4.88304e-32	7.06341e-06	3.50955e-31	1.47983e-30	5.22162e-33	5.1123e-28	8.98105e-31	4.98977e-26	2.82518e-32	2.27124e-33	7.70316e-30	2.01796e-29	1.61654e-06	2.44171e-31	2.98637e-27	4.05038e-30
4256	Time elapsed	22760	-0.320604	1.85255e-44	1.27943e-48	7.4768e-47	2.75336e-47	2.92441e-46	3.85239e-47	7.67668e-49	8.67929e-10	4.66374e-48	1.88161e-47	1.19681e-52	6.84717e-37	7.36485e-41	8.98217e-35	5.15792e-43	1.45397e-40	3.82157e-39	2.00135e-39	1.38269e-08	2.39292e-41	7.58722e-36	3.3627e-41
4257	Keystroke history	662133	0	1	1	1	1	1	1	1	1	1	1	1	1	1	1	1	1	1	1	1	1	1	1
4258	Number entered by participant	661786	0	1	1	1	1	1	1	1	1	1	1	1	1	1	1	1	1	1	1	1	1	1	1
4259	Digits entered correctly	661725	0	1	1	1	1	1	1	1	1	1	1	1	1	1	1	1	1	1	1	1	1	1	1
4260	Round of numeric memory test	22763	0.314524	1.709e-31	6.34984e-26	4.51004e-33	8.74979e-31	1.06968e-29	5.02331e-32	2.68922e-33	1.20891e-16	1.30832e-31	9.30383e-33	6.89203e-39	1.44085e-35	3.92645e-26	1.46291e-36	7.00859e-42	7.18721e-38	5.48293e-36	2.45734e-37	3.59104e-19	3.18834e-37	9.54219e-38	9.73989e-43
4268	Completion status (left)	68164	-1.4259	0.257307	0.127465	0.277033	0.17417	0.135484	0.294917	0.206648	0.510414	0.319233	0.318617	0.64488	0.0864299	0.30702	0.0872404	0.174684	0.0232033	0.0914413	0.0579421	0.213824	0.0737382	0.154306	0.0847961
4269	Number of triplets attempted (left)	68164	0.0446154	0.0381034	0.0272525	0.0112958	0.129939	0.162059	0.0278864	0.148292	0.374195	0.0400906	0.0304671	8.57033e-05	0.00210959	0.00043304	0.00300615	0.00445708	0.00071505	0.00109105	0.000617572	0.110588	0.00701675	0.0137038	0.000410546
4270	Volume level set by participant (left)	67507	-0.258926	2.06279e-12	4.9726e-09	1.29755e-12	2.94834e-12	2.02456e-12	4.07433e-12	2.41074e-13	5.4379e-12	4.12905e-14	7.48712e-14	4.56539e-16	9.94579e-11	3.39249e-08	2.15443e-11	3.53653e-12	8.24012e-11	8.69271e-11	1.23008e-09	7.44907e-09	5.26434e-12	6.81923e-12	3.68108e-12
4272	Duration of hearing test (left)	68164	-0.270788	8.38728e-89	2.60162e-96	1.13666e-93	5.52768e-95	2.80507e-101	6.14079e-91	1.82444e-92	2.89201e-14	1.36978e-90	1.59277e-92	7.00317e-112	6.84805e-78	1.7217e-95	4.53851e-76	5.04462e-86	5.55684e-79	8.61037e-80	1.72328e-82	9.10718e-14	2.0068e-86	4.81422e-76	2.01285e-90
4275	Completion status (right)	68170	-1.42054	0.532438	0.274401	0.593292	0.536142	0.31731	0.598014	0.452669	0.79766	0.707683	0.505851	0.718469	0.0678064	0.240544	0.0619493	0.146345	0.0302941	0.0702543	0.0491215	0.16512	0.0475702	0.119126	0.0703912
4276	Number of triplets attempted (right)	68170	0.0400597	0.122544	0.158694	0.0265521	0.357466	0.309281	0.0979414	0.328928	0.764136	0.112514	0.123076	0.00101965	0.00573368	0.000746747	0.00441152	0.015036	0.0035401	0.00401465	0.004739	0.181364	0.00837559	0.0333667	0.00038426
4277	Volume level set by participant (right)	67459	-0.478954	2.20789e-10	1.81833e-08	6.23711e-10	5.10967e-10	5.59472e-11	4.30128e-10	5.99073e-11	7.85049e-11	6.86067e-11	4.9217e-11	7.5988e-14	8.88305e-17	9.59789e-12	4.10121e-17	1.83661e-18	1.49616e-16	7.34765e-18	7.37445e-17	1.97588e-14	9.52827e-18	4.97566e-18	2.93207e-18
4279	Duration of hearing test (right)	68170	-0.280964	8.93891e-113	5.96171e-126	4.57385e-116	4.1587e-118	1.44086e-115	7.55717e-117	9.55609e-121	4.2452e-23	1.26151e-117	1.24877e-113	1.18027e-140	7.37762e-84	4.92608e-100	1.06205e-83	1.36528e-91	3.48468e-85	5.75937e-84	3.09497e-89	1.121e-17	1.26768e-87	6.80205e-84	1.61214e-91
4281	Completion status of numeric memory test	22800	-1.31209	0.0621031	0.011684	0.0742241	0.0205423	0.0308183	0.0649954	0.0952481	0.386188	0.0387817	0.0272936	0.177963	0.000112505	1.54855e-05	0.000137902	8.69032e-05	0.000143824	6.55452e-05	3.19756e-05	0.127527	3.84339e-05	0.000111662	5.71828e-06
4282	Maximum digits remembered correctly	22800	0.409049	8.77412e-42	4.86715e-36	2.11917e-42	1.81001e-40	1.16421e-40	2.34229e-42	1.24549e-44	4.2318e-21	3.64372e-41	9.42112e-44	2.2065e-54	3.59614e-59	2.82485e-45	3.33196e-60	8.77666e-70	5.44274e-66	1.60688e-60	2.45791e-61	6.95925e-31	1.08301e-61	2.6168e-61	1.21181e-72
4283	Number of rounds of numeric memory test performed	22800	0.322596	4.88997e-33	2.87596e-27	1.93037e-34	6.04969e-33	2.28377e-31	2.34493e-33	1.0069e-34	1.52187e-17	6.96053e-33	2.46405e-34	1.80771e-40	2.1618e-37	1.70352e-28	2.06538e-38	2.53081e-44	2.53815e-40	7.84037e-38	1.01289e-38	1.4305e-18	3.75915e-39	1.89696e-39	7.2164e-46
4285	Time to complete test	22800	-0.0189144	0.196786	0.00547708	0.158113	0.132069	0.0810133	0.129504	0.136096	0.0503857	0.0855645	0.163907	0.220138	0.454524	0.0109048	0.769589	0.511373	0.358839	0.335024	0.344396	0.0227939	0.202153	0.721077	0.698116
4286	Time when initial screen shown	0	0	1	1	1	1	1	1	1	1	1	1	1	1	1	1	1	1	1	1	1	1	1	1
4287	Test completion status	69146	-0.524506	5.19637e-06	9.51071e-08	2.98325e-05	6.74347e-06	3.57467e-08	1.24067e-05	1.44839e-06	0.000852358	2.10839e-05	0.000336723	3.05011e-06	0.280535	0.0481601	0.185643	0.188254	0.0502206	0.168517	0.25763	0.781927	0.300299	0.281585	0.349914
4288	Time to answer	69146	-0.286421	6.27433e-113	4.0478e-127	1.7989e-136	4.97558e-107	9.1323e-109	5.21771e-120	1.91747e-70	8.25755e-08	3.95414e-116	5.1341e-117	7.13962e-148	6.4482e-88	1.75027e-112	2.95186e-87	1.67111e-77	4.80664e-83	4.05326e-104	2.83115e-79	1.22639e-09	1.76047e-66	7.26894e-72	3.11827e-101
4289	Time screen exited	0	0	1	1	1	1	1	1	1	1	1	1	1	1	1	1	1	1	1	1	1	1	1	1
4290	Duration screen displayed	69146	-0.361701	2.92794e-132	1.29838e-138	6.17721e-131	3.04752e-142	7.3927e-139	3.00899e-132	4.50305e-136	2.22397e-41	4.83837e-137	4.08276e-138	4.1366e-167	2.82038e-139	1.19899e-149	8.23596e-137	1.23115e-150	1.25251e-172	1.10389e-146	1.40784e-148	2.79466e-41	6.01089e-147	7.71858e-144	7.29654e-151
4291	Number of attempts	69146	-0.253989	7.14665e-46	1.46378e-43	1.28583e-45	1.2901e-49	4.85338e-48	6.7478e-46	1.56236e-47	1.21774e-19	5.90765e-50	5.82183e-48	4.47054e-60	1.70463e-69	1.4818e-64	1.29563e-68	1.11465e-73	4.00876e-94	5.13885e-71	1.52756e-74	9.24975e-27	4.88374e-70	1.26445e-72	1.67305e-74
4292	PM: initial answer	69146	-1.06023	7.65104e-06	1.07556e-05	0.000103115	3.35694e-06	2.83997e-07	1.17068e-05	1.07065e-05	0.000461676	0.000805881	3.15531e-05	6.82334e-08	0.441703	0.319373	0.437517	0.445111	0.483724	0.468236	0.317429	0.19912	0.262264	0.475701	0.300185
4293	PM: final answer	69146	-0.623654	3.01318e-06	5.12071e-08	1.83967e-05	3.91894e-06	1.8278e-08	7.27628e-06	8.02347e-07	0.000663906	1.23266e-05	0.000213116	1.60077e-06	0.212359	0.0403414	0.16095	0.162677	0.0407283	0.144974	0.225241	0.120463	0.179697	0.199914	0.098184
4294	Final attempt correct	232528	0	1	1	1	1	1	1	1	1	1	1	1	1	1	1	1	1	1	1	1	1	1	1
4295	History of attempts	233089	0	1	1	1	1	1	1	1	1	1	1	1	1	1	1	1	1	1	1	1	1	1	1
102620	Homemade soup intake	2155	1.02053	0.538308	0.564868	0.573271	0.687949	0.415445	0.480259	0.324742	0.351178	0.639671	0.463752	0.326682	0.000245759	0.00141859	0.000222893	0.0166942	0.000214874	0.000168664	0.000288008	0.000336898	0.000471853	0.000231451	0.000489191
864	Number of days/week walked 10+ minutes	212069	-0.175734	1.65649e-115	7.93849e-132	1.97514e-131	1.76811e-128	9.42367e-131	1.80385e-107	1.43116e-122	5.29541e-157	3.24459e-129	9.07016e-143	5.31167e-77	4.28135e-101	6.65071e-127	1.14272e-106	1.29882e-115	5.9711e-121	1.37606e-97	2.32004e-112	1.15977e-120	9.39053e-104	2.32608e-104	2.45902e-106
102700	Starchy food consumers	458607	0	1	1	1	1	1	1	1	1	1	1	1	1	1	1	1	1	1	1	1	1	1	1
874	Duration of walks	180309	0.0772237	1.07869e-60	6.36906e-55	1.77737e-50	6.32113e-66	1.22614e-64	3.89058e-73	1.95684e-55	1.31284e-52	1.59699e-57	1.30242e-48	6.75442e-78	3.53561e-18	2.77747e-21	8.66944e-20	2.20208e-21	1.89847e-20	2.36425e-21	2.05101e-18	2.92903e-23	1.78299e-19	2.65511e-20	2.15564e-123
102710	White pasta intake	3533	0.544372	0.170294	0.148527	0.179511	0.126522	0.510322	0.142607	0.210892	0.237247	0.215736	0.203474	0.104079	0.00227464	0.000305332	0.00258711	0.0217475	0.012394	0.00124279	0.00434722	0.0065834	0.00198512	0.00581638	0.00158483
4407	Average monthly red wine intake	19044	0.205253	0.000352086	0.00188453	0.000503987	0.000163707	0.000227168	0.000295226	0.00296324	0.011104	0.000183969	4.24575e-05	2.19597e-06	2.49115e-13	2.77136e-09	3.33284e-13	8.25391e-12	6.54188e-14	2.53312e-14	1.45615e-12	2.22813e-12	1.40004e-14	3.74759e-13	4.88595e-17
102720	Wholemeal pasta intake	628	-0.791921	0.51931	0.55322	0.518494	0.673649	0.365189	0.57488	0.426035	0.328649	0.375646	0.696596	0.35252	0.0700067	0.0494946	0.0808115	0.0753531	0.0477632	0.110526	0.053355	0.154815	0.0800912	0.0709208	0.135207
4418	Average monthly champagne plus white wine intake	19022	0.140833	0.00169743	0.00233568	0.00190459	0.00520402	0.00661033	0.00137621	0.00156901	0.00408021	0.00551711	0.000435042	0.000117308	5.19943e-07	1.86702e-06	1.88971e-06	1.35181e-06	9.76482e-07	1.6865e-06	4.15511e-07	4.03718e-05	6.75804e-09	1.36286e-06	1.0441e-07
102730	White rice intake	2883	0.420037	0.700517	0.864731	0.534456	0.420661	0.605378	0.58494	0.606269	0.343296	0.513432	0.417438	0.626585	0.390459	0.100995	0.384504	0.250263	0.460872	0.216457	0.453629	0.274455	0.454855	0.349071	0.60048
4429	Average monthly beer plus cider intake	19108	0.0389582	0.756898	0.549165	0.695356	0.935817	0.805102	0.678379	0.40805	0.767874	0.680783	0.795159	0.761989	0.164148	0.0971551	0.131	0.592961	0.401011	0.440368	0.0291448	0.17673	0.0575019	0.0984275	0.869238
35	Was blood sampling attempted	565277	0	1	1	1	1	1	1	1	1	1	1	1	1	1	1	1	1	1	1	1	1	1	1
102740	Brown rice intake	694	2.33123	0.162173	0.0699578	0.173321	0.370395	0.39509	0.173955	0.125485	0.423607	0.101438	0.0826951	0.0481505	0.0349293	0.00850006	0.0305894	0.0180723	0.0620319	0.0410972	0.0757816	0.113428	0.0596015	0.0260376	0.0558739
4440	Average monthly spirits intake	19015	0.0313333	0.0937865	0.313041	0.107262	0.0989622	0.236464	0.0716412	0.259893	0.237178	0.0902186	0.126281	0.0557562	0.264349	0.112176	0.401454	0.412885	0.945545	0.647947	0.114375	0.763237	0.0690804	0.234009	0.593172
102750	Sushi intake	97	0.501124	0.116406	0.149373	0.258691	0.0698976	0.0485555	0.0846867	0.178169	0.1726	0.151371	0.0729578	0.151787	0.639617	0.383144	0.591225	0.461345	0.363169	0.512766	0.729669	0.43621	0.533968	0.539556	0.539079
884	Number of days/week of moderate physical activity 10+ minutes	203510	-0.263086	9.06691e-48	5.94249e-77	2.01416e-71	6.84359e-55	1.33493e-55	6.01061e-42	1.66136e-59	7.70247e-84	6.108e-64	1.99876e-75	2.98023e-55	3.05524e-216	3.11291e-275	3.95453e-223	3.66716e-254	1.22684e-258	1.89456e-208	3.19599e-236	2.32827e-249	1.05578e-221	8.11037e-215	6.32715e-78
4451	Average monthly fortified wine intake	19113	-0.0341055	0.0273309	0.092176	0.0479932	0.022159	0.0507236	0.0189204	0.123557	0.0402891	0.0275183	0.0237058	0.0154911	0.223128	0.102664	0.188645	0.655756	0.138098	0.206842	0.0839909	0.274027	0.505562	0.246082	0.366671
102760	Snackpot intake	42	-10.2022	0.215544	0.135206	0.186309	0.172158	0.314714	0.283753	0.237536	0.216818	0.210425	0.175005	0.403129	0.0139597	0.00534697	0.0115689	0.224727	0.00902391	0.0172142	0.0178158	0.0259571	0.0147389	0.0151116	0.00900539
4462	Average monthly intake of other alcoholic drinks	19130	-0.0290601	0.124721	0.0799845	0.101618	0.203589	0.147229	0.0593994	0.0764613	0.137554	0.168182	0.21019	0.617742	0.298951	0.732192	0.375516	0.156386	0.0695495	0.0859824	0.446696	0.199114	0.780457	0.323541	0.0838945
102770	Couscous intake	670	-0.594731	0.539179	0.301573	0.641062	0.298773	0.443105	0.527784	0.517079	0.364282	0.840056	0.518107	0.769091	0.0552922	0.253321	0.0592919	0.0507578	0.00456746	0.0532924	0.026942	0.175169	0.111483	0.0277941	0.0714826
102780	Other grain intake	149	-1.55554	0.0100697	0.00781256	0.0194284	0.00933618	0.040298	0.00558547	0.0108924	0.152613	0.00806144	0.0204947	0.00422753	0.075561	0.135776	0.0555879	0.0459117	0.245832	0.0678339	0.124229	0.0503587	0.0685739	0.0926749	0.0736462
102800	Cheese consumers	458607	0	1	1	1	1	1	1	1	1	1	1	1	1	1	1	1	1	1	1	1	1	1	1
4501	Non-accidental death in close genetic family	224176	0	1	1	1	1	1	1	1	1	1	1	1	1	1	1	1	1	1	1	1	1	1	1
102810	Low fat hard cheese intake	1599	0.267373	0.107495	0.0395729	0.101632	0.0945067	0.154884	0.124703	0.109023	0.17452	0.119428	0.116675	0.224857	0.187992	0.0955778	0.239306	0.223863	0.224273	0.165232	0.1764	0.254455	0.0661432	0.150541	0.117438
102820	Hard cheese intake	8474	0.209299	0.199801	0.347546	0.234671	0.178725	0.126012	0.168069	0.170733	0.133161	0.109989	0.14037	0.161241	0.0124261	0.0885005	0.016542	0.0315052	0.0279185	0.0109329	0.0121148	0.00507662	0.00970142	0.011637	0.00367248
4526	Happiness	69374	0.75306	5.31269e-05	7.39898e-05	8.05159e-06	0.000118636	0.000163784	9.57298e-05	9.51721e-05	0.0485962	4.41828e-05	0.000120002	0.00102879	0.00181163	0.0012616	0.00147995	0.00023352	0.00122187	0.0033329	0.00256717	0.018787	0.000603634	0.00235034	5.01815e-05
102830	Soft cheese intake	1090	-1.1192	0.0571741	0.0280604	0.0436272	0.105972	0.0348509	0.0709918	0.0644305	0.274674	0.0568025	0.0592819	0.0878443	0.0932254	0.139584	0.103821	0.0764357	0.078541	0.119245	0.200328	0.177003	0.0825483	0.0949535	0.0956046
102840	Blue cheese intake	651	5.28207	0.2236	0.14754	0.280126	0.121218	0.767454	0.276981	0.0949347	0.137796	0.0589031	0.42105	0.365168	0.144151	0.0971114	0.201462	0.190833	0.0680043	0.0884025	0.150695	0.327061	0.103036	0.345571	0.1542
4537	Work/job satisfaction	69374	2.06997	1.298e-10	3.90343e-11	5.53081e-11	3.66495e-12	5.93746e-11	8.24659e-11	4.42621e-11	3.13011e-05	2.04874e-10	4.34699e-11	3.92113e-09	9.94737e-11	1.26802e-09	5.55407e-10	1.49395e-12	3.46611e-12	2.71301e-11	6.44885e-10	1.018e-06	9.47342e-12	4.64521e-11	2.02635e-09
102850	Low fat cheese spread intake	657	0.568143	0.0226503	0.0317962	0.0254085	0.0350833	0.028945	0.0218151	0.0250186	0.0357742	0.0251407	0.02983	0.0811184	0.0805771	0.268946	0.0680443	0.0419669	0.0560398	0.145944	0.127339	0.108525	0.108163	0.062559	0.0712448
4548	Health satisfaction	69374	1.42052	2.00541e-06	1.9202e-07	1.98663e-06	4.9869e-06	3.95821e-05	1.24179e-06	3.94709e-06	5.92228e-06	8.87518e-07	4.47705e-07	1.77845e-09	4.73091e-10	1.26923e-10	2.99763e-10	1.12581e-10	3.73225e-10	4.03033e-09	3.26834e-09	6.27666e-14	4.30196e-10	1.34326e-10	4.52373e-09
904	Number of days/week of vigorous physical activity 10+ minutes	204346	0.113603	4.6812e-13	0.60007	1.29265e-08	3.61128e-16	4.96979e-18	7.46807e-17	3.34602e-15	4.3345e-09	2.40746e-13	1.42665e-06	2.9548e-25	5.21624e-42	9.74343e-51	9.58125e-43	2.63823e-47	4.30501e-47	8.47429e-52	4.06574e-43	7.55221e-49	1.43822e-46	5.69653e-44	2.39114e-05
102860	Cheese spread intake	557	-1.07572	0.016069	0.0508693	0.0232828	0.0286776	0.0222303	0.0196692	0.00902818	0.0178181	0.0187092	0.0173033	0.0308228	0.315728	0.587723	0.383393	0.271376	0.135868	0.26633	0.290733	0.353559	0.217128	0.240078	0.204864
36	Blood pressure device ID	558077	0	1	1	1	1	1	1	1	1	1	1	1	1	1	1	1	1	1	1	1	1	1	1
4559	Family relationship satisfaction	69374	0.920684	2.72968e-19	5.61089e-17	6.83794e-20	3.78044e-18	1.47495e-18	4.29516e-20	2.45713e-20	7.18071e-17	1.83419e-18	8.15632e-19	1.34002e-22	0.000185366	6.0572e-06	0.000220534	0.000243552	0.00017829	0.000282824	0.000422013	0.0310199	0.000184912	4.7029e-05	6.55598e-05
102870	Cottage cheese intake	568	-0.618861	0.348619	0.412166	0.324751	0.48387	0.608302	0.234983	0.432593	0.6862	0.46582	0.262717	0.340609	0.0974281	0.175673	0.15125	0.0428691	0.124443	0.128321	0.217342	0.182391	0.0621877	0.0799066	0.0450271
4570	Friendships satisfaction	69374	1.23234	7.05507e-07	1.69693e-06	2.04408e-06	3.35548e-07	2.44403e-06	3.57251e-07	5.11228e-07	0.000548319	1.88113e-06	3.44996e-07	1.24852e-07	4.93072e-10	1.47064e-08	1.0209e-09	4.44628e-11	2.73016e-09	4.48698e-09	5.11496e-09	1.87276e-07	2.14604e-10	8.37766e-11	6.72312e-12
102880	Feta intake	427	-3.65252	0.349532	0.459176	0.405063	0.38309	0.286885	0.341034	0.331189	0.346295	0.434793	0.452211	0.301365	0.168001	0.195113	0.186418	0.210838	0.120416	0.121234	0.117275	0.210711	0.367117	0.161919	0.141495
4581	Financial situation satisfaction	69374	1.73518	3.12858e-10	5.03582e-10	2.88795e-09	1.05227e-09	2.2696e-11	3.10299e-11	1.83236e-10	2.27929e-07	4.35742e-10	3.5053e-11	3.5839e-08	5.28065e-10	2.25363e-12	5.36329e-10	2.24523e-12	3.59182e-12	1.47531e-08	3.393e-09	5.43304e-06	3.08339e-11	5.62949e-11	3.81598e-08
102890	Mozzarella intake	591	0.297777	0.384278	0.502733	0.460843	0.540739	0.532773	0.446584	0.534758	0.369413	0.40639	0.167596	0.130979	0.323549	0.473736	0.251431	0.439419	0.405694	0.281052	0.395718	0.33062	0.274258	0.386411	0.0614433
102900	Goat's cheese intake	473	-4.30117	0.189109	0.0877822	0.22002	0.254623	0.149086	0.216393	0.282115	0.269992	0.231815	0.269577	0.0907981	0.105326	0.276646	0.0964705	0.0313692	0.227246	0.0745871	0.180517	0.258675	0.0350919	0.0864907	0.125613
4598	Ever depressed for a whole week	230975	0	1	1	1	1	1	1	1	1	1	1	1	1	1	1	1	1	1	1	1	1	1	1
914	Duration of vigorous activity	109577	-0.0454576	3.47555e-99	2.87043e-57	1.63213e-99	1.20823e-97	1.35656e-101	2.8001e-115	1.7449e-91	9.79795e-113	1.02342e-98	2.46795e-91	1.13169e-59	3.77499e-05	3.9966e-06	0.000910855	0.00235886	2.17292e-06	6.65593e-05	0.00591842	0.067966	0.000209043	5.36236e-05	8.8195e-27
102910	Other cheese intake	600	-0.173367	0.00303776	0.00287414	0.00861911	0.00722093	0.00154691	0.0070819	0.00381319	0.00574426	0.00276706	0.000917128	0.00529942	0.820013	0.139797	0.724569	0.711102	0.342962	0.774936	0.685503	0.66645	0.72386	0.798922	0.743621
4609	Longest period of depression	31066	0.0475361	0.000319251	0.000950298	0.000369312	0.000290297	0.0064077	0.000400642	0.00084397	0.0469337	0.00111399	0.000138329	4.90019e-05	0.0276248	0.060403	0.0130164	0.0199846	0.294729	0.00377055	0.0255895	0.933425	0.00756556	0.0127823	0.00129297
4620	Number of depression episodes	28469	0.0437437	8.55646e-05	0.00115436	0.00127302	9.20143e-05	0.00059731	0.000130911	0.000310026	0.00268986	9.56161e-05	1.94832e-05	3.50386e-05	0.0517318	0.0972706	0.0378152	0.0146115	0.48665	0.012435	0.0344909	0.968994	0.0404689	0.0156534	0.0156101
102930	Egg consumers	458607	0	1	1	1	1	1	1	1	1	1	1	1	1	1	1	1	1	1	1	1	1	1	1
4631	Ever unenthusiastic/disinterested for a whole week	225751	0	1	1	1	1	1	1	1	1	1	1	1	1	1	1	1	1	1	1	1	1	1	1
102940	Whole egg intake	3705	1.31474	0.240204	0.230856	0.157834	0.265495	0.303864	0.217093	0.315576	0.265573	0.324008	0.345167	0.110048	0.117628	0.105973	0.0980559	0.110931	0.145631	0.171309	0.0706799	0.116439	0.118021	0.0995826	0.0917452
4642	Ever manic/hyper for 2 days	229699	0	1	1	1	1	1	1	1	1	1	1	1	1	1	1	1	1	1	1	1	1	1	1
102950	Omelette intake	1273	0.308713	0.233217	0.292075	0.264738	0.189342	0.108747	0.200588	0.241562	0.442253	0.19834	0.250504	0.520379	0.532924	0.346496	0.415851	0.476885	0.617188	0.529946	0.536308	0.829108	0.721312	0.449958	0.373942
924	Usual walking pace	215224	-1.7904	0.0310479	0.0654482	0.0332562	0.0334867	0.0284134	0.00615374	0.028354	0.0196997	0.0350689	0.0269726	0.0193732	0.00130696	4.67848e-07	0.00154519	0.0020087	0.00103232	0.000603957	0.000279142	0.000551009	0.00036852	0.00202485	0.000714376
4653	Ever highly irritable/argumentative for 2 days	230520	0	1	1	1	1	1	1	1	1	1	1	1	1	1	1	1	1	1	1	1	1	1	1
102960	Eggs in sandwiches intake	799	-0.164604	0.272608	0.156349	0.321297	0.462362	0.160554	0.306537	0.176119	0.366884	0.309595	0.464935	0.116237	0.773781	0.864184	0.825266	0.360764	0.37228	0.578103	0.65581	0.636511	0.613848	0.711674	0.534634
102970	Scotch egg intake	56	0.553569	0.0207799	0.0448342	0.0236278	0.0850612	0.0241972	0.0314563	0.0197336	0.016912	0.0341487	0.0225563	0.0120502	0.504636	0.348846	0.640094	0.303929	0.277595	0.473968	0.288228	0.794514	0.752601	0.351733	0.127608
4674	Private healthcare	69374	0.912262	1.60072e-05	4.10114e-05	8.39166e-05	4.81473e-06	4.08092e-05	6.87075e-06	3.66048e-06	0.00048647	5.07538e-05	2.35224e-06	1.12226e-10	3.07533e-05	2.17081e-05	4.76012e-05	3.54822e-06	0.000114463	2.4328e-05	1.14977e-05	0.0247754	1.3468e-05	1.71519e-05	1.55098e-07
102980	Other egg intake	474	-1.29848	0.138098	0.218028	0.0584639	0.108512	0.313054	0.177039	0.122273	0.198886	0.0697195	0.10287	0.0770446	0.0500155	0.0911123	0.052567	0.0519676	0.0629934	0.0796845	0.0292155	0.0857622	0.0860487	0.0589078	0.0369848
37	Blood pressure manual sphygmomanometer device ID	10264	0	1	1	1	1	1	1	1	1	1	1	1	1	1	1	1	1	1	1	1	1	1	1
4689	Age glaucoma diagnosed	856	0.319213	0.0439213	0.00619841	0.0267976	0.0939335	0.0173789	0.0377915	0.0222176	0.0471892	0.121715	0.0811526	0.122721	0.0182848	0.0474245	0.0201309	0.00599321	0.0104837	0.00816267	0.0346253	0.113815	0.0450072	0.0177939	0.0178976
103000	Meat consumers	458607	0	1	1	1	1	1	1	1	1	1	1	1	1	1	1	1	1	1	1	1	1	1	1
4700	Age cataract diagnosed	3111	0.197063	0.0223583	0.17636	0.00388235	0.0565013	0.0414635	0.0395434	0.0365296	0.00231005	0.0219695	0.0237876	0.0235232	0.00832652	0.0131258	0.00652689	0.0276734	0.00132224	0.00631862	0.0214934	0.115791	0.00803384	0.00757466	0.0163659
103010	Sausage intake	1838	0.670223	0.000305416	0.000202382	0.000347929	0.00112733	0.000315702	0.000429747	0.000238341	0.00955344	0.000642039	0.000372151	0.0002699	0.0187227	0.0226872	0.0201613	0.0427685	0.046094	0.019401	0.0197037	0.0953187	0.0110861	0.0116128	0.0210479
103020	Beef intake	4907	0.237865	0.110435	0.146358	0.134919	0.0460405	0.0878364	0.0831551	0.123738	0.0148103	0.197911	0.119803	0.18001	0.12916	0.0459942	0.131386	0.226039	0.145435	0.0899317	0.217349	0.0420384	0.0921178	0.11245	0.106559
4717	Shortness of breath walking on level ground	231679	0	1	1	1	1	1	1	1	1	1	1	1	1	1	1	1	1	1	1	1	1	1	1
103030	Pork intake	1816	0.579677	0.11287	0.0480689	0.0952344	0.0607009	0.081565	0.132728	0.192302	0.316701	0.100303	0.100176	0.0972073	0.0238045	0.0246008	0.0284531	0.0704084	0.0266966	0.0343528	0.00479316	0.0311907	0.0248291	0.020204	0.0399916
4728	Leg pain on walking	233987	0	1	1	1	1	1	1	1	1	1	1	1	1	1	1	1	1	1	1	1	1	1	1
103040	Lamb intake	1501	0.578306	0.254228	0.265271	0.216244	0.189246	0.173725	0.186836	0.230011	0.20772	0.24232	0.165255	0.142889	0.0426873	0.0404874	0.0306555	0.0964265	0.142679	0.037141	0.0536053	0.0360902	0.0227007	0.0360151	0.0205515
103050	Crumbed or deep-fried poultry intake	990	0.692829	0.14225	0.247821	0.154818	0.339618	0.0472285	0.0976181	0.195205	0.105617	0.171406	0.204285	0.368555	0.0366262	0.0376819	0.0239016	0.0384509	0.0289191	0.0481311	0.0219419	0.115526	0.0246026	0.031587	0.0236723
103060	Poultry intake	6970	0.281593	0.00864032	0.121942	0.0124038	0.0124401	0.00541778	0.0224756	0.0114268	0.00216683	0.0275571	0.00405374	0.0187248	0.0191201	0.00453118	0.0316292	0.187644	0.00563109	0.0141204	0.0132435	0.134333	0.0104437	0.0104989	0.0253947
189	Townsend deprivation index at recruitment	215691	-0.117418	1.91323e-40	6.36899e-17	2.37472e-28	3.08389e-46	4.24775e-53	1.22344e-38	2.10488e-46	7.34456e-44	3.40426e-45	1.57264e-44	8.42004e-294	1.8242e-46	1.59569e-18	6.26886e-35	1.94887e-49	1.05572e-97	2.34516e-54	1.68523e-43	2.05978e-31	1.34273e-51	6.59846e-47	2.06069e-259
103070	Bacon intake	2160	0.346091	0.254799	0.342953	0.105575	0.200455	0.224013	0.307665	0.255781	0.13273	0.313425	0.214094	0.0926308	0.281617	0.349369	0.309836	0.32265	0.0638746	0.261844	0.353564	0.378918	0.245449	0.345439	0.315417
103080	Ham intake	3987	0.23127	0.399774	0.301448	0.463179	0.125016	0.317149	0.3972	0.277381	0.610842	0.362198	0.226546	0.166396	0.166652	0.0766892	0.145116	0.180516	0.25105	0.102994	0.088525	0.33851	0.180935	0.0893763	0.232123
103090	Liver intake	493	3.55173	0.383199	0.390812	0.447705	0.2825	0.34936	0.403942	0.429455	0.181774	0.391412	0.265668	0.415093	0.167767	0.302545	0.194041	0.211357	0.272543	0.156553	0.0905867	0.201065	0.113187	0.151705	0.175159
4792	Cochlear implant	235975	0	1	1	1	1	1	1	1	1	1	1	1	1	1	1	1	1	1	1	1	1	1	1
103100	Other meat intake	447	-1.74231	0.321803	0.265077	0.544716	0.265264	0.345773	0.347029	0.261703	0.171855	0.463214	0.261284	0.214523	0.0786684	0.039137	0.0662209	0.0375678	0.16532	0.0789458	0.0581809	0.0464611	0.0907007	0.0489292	0.116295
4803	Tinnitus	69337	0.596278	0.0101842	0.0337988	0.00954685	0.00240354	0.00263898	0.00568246	0.0142186	0.0176014	0.00541685	0.00391025	0.000998366	3.80551e-06	2.12584e-05	8.31686e-06	5.56758e-06	2.3213e-07	1.27135e-05	6.11222e-07	7.17612e-06	5.87788e-06	1.62179e-06	1.51656e-08
38	Hand grip dynamometer device ID	560116	0	1	1	1	1	1	1	1	1	1	1	1	1	1	1	1	1	1	1	1	1	1	1
4814	Tinnitus severity/nuisance	18071	-0.316399	0.00872042	0.0126284	0.0201354	0.00247728	0.0333256	0.0061585	0.00704147	0.0579839	0.00638306	0.00710342	0.00214886	0.362989	0.396021	0.470346	0.473644	0.321727	0.347791	0.471469	0.232218	0.387385	0.323524	0.224728
103120	Fat removed from meat	112392	0	1	1	1	1	1	1	1	1	1	1	1	1	1	1	1	1	1	1	1	1	1	1
4825	Noisy workplace	69337	0.753853	0.000496987	0.0068734	0.00302936	6.61232e-06	0.000399841	0.000158794	0.000391706	0.00661216	0.000638994	0.000117528	1.3153e-05	0.000136191	9.35783e-05	0.000224667	0.000310854	2.11096e-06	8.27692e-05	5.89478e-05	0.00065021	0.000323145	0.000212715	8.65358e-05
103130	Skin removed from poultry	97704	0	1	1	1	1	1	1	1	1	1	1	1	1	1	1	1	1	1	1	1	1	1	1
103140	Fish consumer	458607	0	1	1	1	1	1	1	1	1	1	1	1	1	1	1	1	1	1	1	1	1	1	1
4836	Loud music exposure frequency	69337	0.512813	2.03858e-05	0.000121574	3.52813e-05	7.80945e-06	8.7959e-05	1.66903e-05	2.98041e-05	0.00036028	1.37928e-05	7.41777e-06	1.34932e-07	0.000891912	0.0019539	0.000936129	0.000247569	0.000383958	0.0025781	6.0641e-05	0.0215582	0.00034268	0.00156527	0.00059338
103150	Tinned tuna intake	1811	0.797333	0.277287	0.300629	0.431806	0.448334	0.265022	0.301394	0.287467	0.16347	0.214922	0.289319	0.359999	0.115111	0.0896246	0.145589	0.0874318	0.290099	0.106448	0.087077	0.241308	0.174093	0.0851179	0.32691
4849	Hearing test done	69262	1.1718	5.42084e-11	2.87622e-10	1.44146e-10	3.82227e-11	4.80291e-11	3.72907e-11	5.64912e-12	5.6419e-10	8.12169e-11	3.56843e-11	2.39685e-13	2.36398e-16	2.91871e-18	1.24598e-15	3.02198e-16	6.44006e-16	4.86425e-17	4.99244e-16	3.53303e-11	5.20489e-17	2.18677e-16	2.47746e-17
103160	Oily fish intake	3388	0.536832	0.069465	0.032324	0.0456258	0.070438	0.0705749	0.0759075	0.0458082	0.046223	0.106911	0.0528161	0.135372	0.0766501	0.150438	0.0946822	0.0199785	0.0278714	0.0768238	0.0743456	0.0486742	0.21137	0.0726027	0.177483
103170	Breaded fish intake	665	-0.445951	0.0238504	0.0136817	0.078829	0.0114528	0.0330093	0.0259005	0.0360082	0.0148593	0.0460438	0.0229151	0.0601127	0.309365	0.396018	0.225752	0.348945	0.511141	0.286529	0.249049	0.210619	0.260936	0.352572	0.388953
103180	Battered fish intake	610	-1.5651	0.242345	0.113942	0.272142	0.214621	0.262276	0.203632	0.158738	0.271208	0.215076	0.393392	0.586431	0.337733	0.650969	0.295454	0.417685	0.300563	0.307646	0.310513	0.298024	0.26903	0.341071	0.412987
103190	White fish intake	1435	1.05397	0.0772791	0.0557417	0.0572778	0.0556497	0.0323209	0.0762379	0.0679507	0.237925	0.0162869	0.115528	0.123271	0.0820298	0.0366892	0.0844445	0.118298	0.166166	0.0733311	0.2006	0.192226	0.0635718	0.0555591	0.0965164
103200	Prawns intake	1568	1.68399	0.313279	0.473802	0.480264	0.333969	0.195499	0.196415	0.367989	0.196709	0.400619	0.168059	0.260395	0.249531	0.421792	0.301014	0.305151	0.284678	0.195951	0.1552	0.170089	0.359513	0.250722	0.232866
103210	Lobster/crab intake	149	-6.43531	0.563897	0.545595	0.500182	0.590139	0.318526	0.5868	0.526033	0.215411	0.583607	0.398366	0.646284	0.0643541	0.286399	0.0859091	0.0383362	0.0133999	0.0674872	0.0680896	0.0106167	0.0539082	0.0694055	0.247972
103220	Shellfish intake	279	-3.09016	0.0693932	0.0356538	0.12314	0.123239	0.0136443	0.0256987	0.0971941	0.0635251	0.0808107	0.109138	0.16057	0.0207414	0.182494	0.0225851	0.0132163	0.0534257	0.0107509	0.0274122	0.00347893	0.0206485	0.0177686	0.173077
4924	Attempted fluid intelligence (FI) test.	68618	-1.6771	9.71865e-24	3.29031e-25	4.96674e-24	1.28351e-25	1.25723e-23	5.65986e-25	2.17264e-23	1.67498e-09	6.8603e-25	1.00543e-23	3.94916e-31	1.74206e-36	6.23694e-43	5.44651e-35	2.23031e-35	1.90327e-35	1.93027e-37	1.29932e-38	1.24651e-13	3.81509e-40	8.84679e-38	1.08827e-40
103230	Other fish intake	459	2.19433	0.150371	0.203912	0.187193	0.18542	0.241357	0.120229	0.124296	0.215054	0.0719231	0.142712	0.27409	0.229885	0.146643	0.248657	0.35669	0.332725	0.346176	0.167488	0.238197	0.346588	0.234485	0.141053
39	Height measure device ID	560359	0	1	1	1	1	1	1	1	1	1	1	1	1	1	1	1	1	1	1	1	1	1	1
4935	FI1 : numeric addition test	67796	1.05855	5.32401e-18	3.38429e-17	3.97853e-18	3.0395e-17	7.49615e-17	3.4523e-18	3.1108e-19	4.89344e-08	2.13902e-19	8.11314e-21	1.08547e-21	1.83728e-13	1.64233e-13	1.3945e-13	1.34774e-12	1.98185e-17	3.19569e-13	5.46327e-13	4.74593e-08	8.31986e-14	6.03316e-14	6.48466e-14
4946	FI2 : identify largest number	67694	2.43554	0.135035	0.0506707	0.0935225	0.132922	0.125268	0.143107	0.170778	0.0577322	0.223705	0.187178	0.283473	0.000337132	0.000154664	0.000384857	0.000740189	1.84417e-05	0.000368421	0.000498921	0.0688749	0.000372165	0.000107197	0.000597352
103250	Vegetarian alternatives intake	458607	0	1	1	1	1	1	1	1	1	1	1	1	1	1	1	1	1	1	1	1	1	1	1
103260	Vegetarian sausages/burgers intake	296	1.38253	0.0249804	0.0113183	0.0464685	0.0178891	0.0674272	0.0200426	0.0203404	0.00350069	0.0972907	0.0151435	0.0941893	0.610923	0.172201	0.606653	0.657772	0.427495	0.453016	0.612482	0.611575	0.413823	0.685935	0.714364
4957	FI3 : word interpolation	67673	2.2018	0.000417872	0.000951157	0.00158141	9.87323e-05	0.000826439	0.000516032	0.000725033	0.0430533	0.000143613	7.96081e-05	3.80951e-05	4.62072e-16	4.15457e-14	1.4251e-15	1.09477e-17	3.71857e-16	5.12002e-15	1.45524e-14	6.80686e-10	1.90532e-16	1.93063e-16	1.87256e-17
103270	Tofu intake	193	1.05806	0.515438	0.125302	0.685769	0.373525	0.252445	0.556754	0.402695	0.478009	0.35013	0.403247	0.556479	0.400777	0.286775	0.402235	0.0976309	0.304592	0.551635	0.401639	0.117567	0.428886	0.223321	0.535738
4968	FI4 : positional arithmetic	67616	0.860439	4.36774e-42	7.68552e-45	1.43442e-38	5.65312e-45	4.76529e-45	5.60139e-43	3.64021e-42	1.08039e-16	9.31181e-42	3.88806e-45	1.07775e-62	7.12423e-71	4.19503e-62	1.23089e-71	1.38618e-76	7.22995e-80	9.73515e-76	7.11222e-72	1.47932e-36	3.59811e-75	7.81551e-78	3.71361e-88
103280	Quorn intake	445	1.32655	0.00668385	0.00960386	0.00313604	0.0059273	0.0355583	0.00494032	0.0118042	0.00198534	0.00260526	0.00269617	0.0436394	0.0433943	0.0952147	0.0523954	0.0356742	0.0380775	0.0142348	0.021459	0.0756662	0.0349498	0.0319451	0.0278076
4979	FI5 : family relationship calculation	66663	0.323147	2.52499e-07	1.49572e-10	2.13419e-08	1.12544e-07	4.92724e-08	7.35173e-07	6.68975e-07	0.0278803	3.35566e-07	1.32946e-06	2.87594e-11	1.2646e-15	1.09822e-16	6.73349e-16	2.52141e-17	1.69565e-15	2.98978e-16	1.41713e-15	1.41321e-07	1.06199e-16	2.17804e-17	1.79674e-19
103290	Other vegetarian alternative intake	307	1.11317	0.301409	0.355304	0.195412	0.256387	0.376084	0.232267	0.229136	0.541493	0.306387	0.364674	0.241241	0.0556425	0.206286	0.0798076	0.0279491	0.431631	0.0392489	0.12274	0.117634	0.0337973	0.0370061	0.0133699
4990	FI6 : conditional arithmetic	60271	0.79219	1.038e-42	3.74006e-43	1.83586e-40	3.59783e-46	4.55537e-49	7.51595e-43	1.20906e-43	1.09814e-18	1.50155e-43	6.18333e-47	3.90951e-56	6.15047e-68	7.32765e-52	5.09874e-69	1.04105e-70	2.14952e-79	3.17841e-73	3.27626e-72	2.24921e-40	5.25998e-66	1.10725e-74	5.88776e-90
5001	FI7 : synonym	49506	2.48953	0.0613934	0.0146794	0.0459536	0.0243893	0.0107008	0.0739388	0.0869239	0.118535	0.15309	0.046096	0.00778608	1.24647e-08	2.77325e-08	1.33463e-08	2.81154e-08	1.02304e-08	1.554e-08	3.87794e-09	2.19496e-06	1.96646e-08	3.47659e-09	1.15855e-08
103310	Spreads/sauces consumers	458607	0	1	1	1	1	1	1	1	1	1	1	1	1	1	1	1	1	1	1	1	1	1	1
5012	FI8 : chained arithmetic	45099	0.684933	8.55567e-23	1.91289e-25	1.41605e-23	2.90968e-26	1.21423e-24	2.53034e-22	1.26115e-21	2.25693e-11	1.28232e-22	5.31369e-25	3.44132e-34	8.06983e-49	7.44579e-43	8.96193e-50	5.17585e-54	4.40959e-53	7.06389e-51	4.31099e-53	1.34379e-29	9.26938e-49	4.36542e-54	5.5587e-56
40	Manual scales device ID	535206	0	1	1	1	1	1	1	1	1	1	1	1	1	1	1	1	1	1	1	1	1	1	1
5057	Number of older siblings	60339	-0.0844387	1.69854e-12	6.36558e-13	7.02994e-13	7.2281e-13	2.103e-12	2.02595e-12	3.7317e-13	0.0102951	3.89467e-13	5.20095e-17	9.45932e-27	4.74041e-08	2.72603e-08	1.10956e-08	4.05575e-07	5.04556e-10	2.45814e-09	4.28859e-08	7.36985e-05	5.22028e-09	3.38271e-13	6.27614e-10
5074	Number of letters shown in round (left)	45065	0.0651699	0.00319085	0.0077465	0.00167889	0.0158495	0.000617705	0.00222842	0.000606956	0.0841941	0.00767546	0.00114352	0.00715253	0.000248813	0.000392954	0.000215667	0.000318615	6.06015e-05	0.000414597	0.000196495	0.00629122	0.000631085	0.00028689	0.000111444
5075	Number of letters shown in round (right)	45090	0.0530278	0.000219999	0.000696133	0.000535763	0.000576077	0.000636181	0.000129037	0.00021841	0.0007488	1.94353e-05	2.14035e-05	0.000816765	0.00287345	0.00279491	0.00203448	0.0031401	0.00225703	0.00292295	0.00407169	0.0207364	0.00232439	0.0053647	0.00399318
5076	Number of letters correct in round (right)	45090	0.0503794	0.00203779	0.0125614	0.00331067	0.000974732	0.00281553	0.00248429	0.00094792	0.00825619	0.000693813	0.00117352	0.000739738	0.00462477	0.0184086	0.0150586	0.018733	0.0181065	0.00494397	0.00123486	0.0193768	0.00171051	0.00478961	0.00145412
5077	Number of letters correct in round (left)	45065	0.044755	0.00395124	0.0444564	0.00194429	0.00551681	0.00174821	0.00584129	0.000993885	0.0735621	0.000785849	0.00202587	0.00023869	0.0118773	0.0459184	0.0153239	0.00797561	0.00434839	0.00610573	0.0165726	0.0334259	0.00465089	0.0180917	0.00893098
5078	logMAR in round (left)	45065	-0.184638	2.90314e-33	3.68365e-26	3.73817e-30	4.14328e-29	1.18406e-32	5.09128e-33	6.59982e-35	6.64326e-26	2.83213e-32	9.97676e-37	7.30107e-47	2.91e-25	1.76397e-19	5.23729e-24	5.2976e-24	1.79807e-26	8.39528e-26	6.12472e-26	8.25127e-19	2.19698e-26	8.79882e-26	1.59466e-30
5079	logMAR in round (right)	45090	-0.200338	1.43768e-28	3.79936e-23	3.47615e-26	4.81687e-26	7.53176e-29	8.46485e-29	4.82734e-28	8.04255e-24	1.91686e-29	4.68755e-34	7.94785e-37	1.85803e-29	1.43149e-23	2.75294e-28	8.99999e-29	1.09864e-30	1.10966e-30	1.75056e-30	4.13544e-21	6.07369e-32	3.95417e-28	1.60362e-33
5080	Displayed letters in round (right)	385449	0	1	1	1	1	1	1	1	1	1	1	1	1	1	1	1	1	1	1	1	1	1	1
5081	Displayed letters in round (left)	391864	0	1	1	1	1	1	1	1	1	1	1	1	1	1	1	1	1	1	1	1	1	1	1
5082	Visual acuity result in round (left)	391864	0	1	1	1	1	1	1	1	1	1	1	1	1	1	1	1	1	1	1	1	1	1	1
5083	Visual acuity result in round (right)	385449	0	1	1	1	1	1	1	1	1	1	1	1	1	1	1	1	1	1	1	1	1	1	1
5084	Spherical power (right)	43928	-0.0959257	1.32235e-08	2.52251e-09	3.01497e-06	4.7693e-09	4.0641e-09	4.41805e-09	6.72767e-08	0.00977816	1.51203e-09	4.89241e-12	3.62804e-12	9.80939e-08	0.000389964	1.90531e-07	8.30044e-09	3.07307e-08	3.70381e-08	6.5051e-08	0.00196709	1.41684e-07	1.34481e-09	5.4023e-08
5085	Spherical power (left)	43773	-0.0922632	5.98678e-08	5.136e-09	5.64262e-06	1.4423e-08	4.75217e-08	1.66574e-08	2.11622e-07	0.0223306	6.23662e-09	4.56057e-11	3.12729e-11	3.07017e-07	0.000620803	7.75096e-07	4.80919e-08	2.0661e-08	1.10556e-07	1.80429e-07	0.0016604	2.81977e-07	7.65926e-09	3.8204e-07
5086	Cylindrical power (left)	43773	-0.101896	1.59532e-08	2.88375e-07	2.61091e-08	9.97298e-09	2.50952e-09	2.12869e-08	5.28035e-08	4.63733e-07	2.643e-07	1.31525e-08	4.49604e-08	1.57004e-08	3.65924e-07	1.79295e-08	4.98898e-07	4.17465e-09	7.72398e-08	1.5323e-08	7.56103e-07	1.3499e-09	2.32556e-09	2.18209e-07
5087	Cylindrical power (right)	43928	-0.0966687	2.67471e-05	0.000515861	1.75854e-05	1.30077e-05	2.08628e-06	5.32439e-05	3.66852e-05	7.83408e-06	6.16354e-05	9.17466e-06	0.000320457	7.8076e-08	3.64755e-07	6.33725e-08	2.03913e-05	4.47658e-08	1.09897e-07	2.38726e-08	6.55435e-07	3.02882e-09	7.20098e-08	6.72528e-08
5088	Astigmatism angle (right)	43928	-0.0172896	0.950129	0.934108	0.852385	0.925727	0.518611	0.94852	0.807218	0.913981	0.834194	0.687589	0.131173	0.336771	0.740451	0.273874	0.416985	0.828086	0.187567	0.218838	0.251028	0.756988	0.386856	0.0679478
5089	Astigmatism angle (left)	43773	0.0210277	0.547685	0.727634	0.390527	0.843964	0.555207	0.604617	0.347232	0.0975677	0.484374	0.668762	0.559315	0.243402	0.200524	0.259246	0.576258	0.245099	0.146944	0.153995	0.159521	0.299901	0.15169	0.3839
5090	Refractometry result unreliable (left)	16123	0	1	1	1	1	1	1	1	1	1	1	1	1	1	1	1	1	1	1	1	1	1	1
5091	Refractometry result unreliable (right)	23315	0	1	1	1	1	1	1	1	1	1	1	1	1	1	1	1	1	1	1	1	1	1	1
5096	3mm weak meridian (left)	42572	-0.195226	6.3827e-26	3.02724e-25	4.31144e-27	5.39709e-24	7.72782e-22	4.11871e-27	5.06918e-25	7.27762e-25	3.34765e-26	6.39448e-28	4.86672e-40	1.06353e-26	4.29241e-26	1.75801e-26	1.52033e-25	2.74254e-21	1.09724e-29	4.41343e-28	1.53357e-26	1.40275e-27	1.5907e-34	2.95029e-33
5097	6mm weak meridian (left)	38294	-0.204999	9.46164e-19	6.33418e-19	4.27701e-19	8.01709e-19	2.54522e-16	6.74717e-20	1.10777e-18	1.76448e-17	2.15627e-19	1.93617e-20	7.96593e-29	1.30825e-26	1.49736e-26	2.40333e-26	8.27827e-26	2.47841e-20	3.78342e-29	5.31818e-28	4.52965e-26	3.66734e-27	4.60718e-35	5.38946e-33
5098	6mm weak meridian (right)	38463	-0.196178	4.63022e-17	4.59369e-18	1.73841e-18	7.00255e-16	1.07133e-13	3.07927e-18	3.07122e-17	8.67383e-17	1.84655e-16	1.03182e-18	2.61421e-27	1.28619e-24	2.23283e-23	5.84879e-24	1.20911e-22	5.6477e-19	3.83396e-27	8.5573e-27	1.35592e-25	1.24219e-25	2.66436e-33	8.17116e-31
5099	3mm weak meridian (right)	42546	-0.201845	4.27202e-24	2.76202e-24	2.34026e-25	2.92689e-22	8.92661e-20	1.17397e-25	7.08072e-24	2.75673e-22	2.87801e-23	6.30296e-26	1.2278e-37	2.12485e-28	2.51409e-27	1.0973e-27	1.17585e-26	3.32109e-23	3.44924e-31	1.00273e-29	4.12904e-28	5.89085e-30	4.70951e-37	4.89434e-35
5100	3mm weak meridian angle (right)	42546	0.0481277	0.674037	0.687061	0.696978	0.518093	0.684586	0.728306	0.589633	0.274451	0.374561	0.550013	0.286488	0.00844766	0.123753	0.0051603	0.0134705	0.0167173	0.00202868	0.00413925	0.00159351	0.00795761	0.0325754	0.00137931
5101	6mm weak meridian angle (right)	38463	0.0177753	0.381158	0.363989	0.398538	0.30182	0.506965	0.383763	0.308962	0.423783	0.330101	0.267605	0.166622	0.353733	0.438522	0.261915	0.185349	0.329323	0.251796	0.393388	0.425967	0.657747	0.530921	0.144543
5102	6mm weak meridian angle (left)	38294	-0.0291529	0.706223	0.78477	0.866924	0.828193	0.972875	0.765267	0.732579	0.392332	0.36931	0.46536	0.237075	0.129209	0.293033	0.0833193	0.156512	0.273381	0.0704298	0.155961	0.0220024	0.219999	0.129224	0.0837672
5103	3mm weak meridian angle (left)	42572	-0.0545156	0.0341909	0.060294	0.0258696	0.0628551	0.093345	0.0569095	0.0353155	0.00198861	0.0214289	0.0326141	0.00213887	0.00283658	0.12353	0.000787035	0.0040139	0.00560461	0.00128122	0.00306087	0.000772813	0.00243505	0.00464391	0.000802824
5104	3mm strong meridian angle (left)	42572	0.0131001	0.239675	0.446405	0.237425	0.460245	0.384458	0.338704	0.279298	0.0320671	0.139142	0.241952	0.344733	0.473225	0.903562	0.392002	0.592802	0.362417	0.395152	0.232908	0.265806	0.385914	0.491085	0.512047
5105	6mm strong meridian angle (left)	38294	-0.00186332	0.0821125	0.0885009	0.293058	0.141177	0.251476	0.121577	0.0913615	0.0350183	0.0333788	0.022804	0.00574233	0.922748	0.769029	0.839778	0.968976	0.416166	0.862536	0.9466	0.580347	0.724011	0.86172	0.544631
5106	6mm strong meridian angle (right)	38463	-0.0218609	0.208925	0.478655	0.488435	0.214673	0.35716	0.140328	0.183088	0.0543232	0.126487	0.0990131	0.0579481	0.254065	0.522913	0.180453	0.205627	0.345301	0.251508	0.0818823	0.465469	0.295362	0.348805	0.0964725
5107	3mm strong meridian angle (right)	42546	-0.0277205	0.477597	0.636228	0.316123	0.70274	0.655923	0.512035	0.307144	0.0408494	0.369294	0.487761	0.462872	0.129299	0.450739	0.0664464	0.233618	0.0827318	0.0472372	0.0535504	0.123111	0.169597	0.213327	0.194794
5108	3mm asymmetry angle (right)	42015	-0.0945183	0.0125919	0.0684052	0.103436	0.00806697	0.0027403	0.0119139	0.0129335	0.00469668	0.0103286	0.0231862	0.00058171	2.63276e-07	7.17386e-06	4.56537e-07	6.52993e-07	1.47876e-08	1.40292e-06	3.63603e-07	3.24411e-08	3.17995e-07	1.76482e-07	4.26205e-07
5109	6mm asymmetry angle (right)	25948	-0.0576967	0.129283	0.159724	0.301635	0.19027	0.0920548	0.118789	0.103869	0.0411342	0.138457	0.125197	0.0366111	0.0121816	0.0596222	0.0108763	0.0427638	0.0121678	0.00856441	0.0104449	0.00108916	0.0046343	0.00472225	0.0172264
5110	6mm asymmetry angle (left)	25578	-0.0852204	0.00237946	0.0336387	0.0268791	0.00196672	0.00362319	0.00159532	0.00195434	7.22014e-05	0.00764483	0.00169335	0.000682875	0.00026207	0.00532645	0.000315985	0.000398358	5.02104e-05	5.18049e-05	0.000553834	0.000324549	8.35448e-05	7.83966e-05	0.000347504
5111	3mm asymmetry angle (left)	41995	-0.0788381	0.000265158	0.00312903	0.00838474	0.000237794	7.86996e-05	0.000581867	0.000162795	2.01765e-06	0.000536614	0.00036995	0.000824228	1.74949e-05	6.34756e-05	3.0901e-05	1.17682e-05	1.69991e-06	1.61618e-05	2.83864e-05	0.00010954	1.06003e-05	1.07921e-05	3.78471e-05
5112	3mm cylindrical power angle (left)	42566	-0.0547274	0.0323896	0.056047	0.0243918	0.0601122	0.0901855	0.0543792	0.0340376	0.00185996	0.0202392	0.0310213	0.00197674	0.00273125	0.122053	0.000745402	0.00388146	0.00532533	0.0012388	0.00298601	0.000752237	0.00237865	0.00451671	0.000747536
5113	6mm cylindrical power angle (left)	38285	-0.0284158	0.702887	0.789121	0.863112	0.82629	0.966355	0.759751	0.729415	0.379293	0.359324	0.467222	0.234324	0.139225	0.31192	0.0914592	0.165273	0.286765	0.0773018	0.167961	0.0237963	0.233189	0.139533	0.0895071
5114	6mm cylindrical power angle (right)	38450	0.0178878	0.38784	0.368718	0.408028	0.306712	0.510965	0.395077	0.310645	0.43187	0.337249	0.273262	0.166285	0.350734	0.433381	0.258003	0.186671	0.324177	0.251566	0.386191	0.423055	0.649774	0.524441	0.146345
5115	3mm cylindrical power angle (right)	42539	0.0488023	0.675405	0.686816	0.698057	0.514653	0.684088	0.727118	0.592006	0.277996	0.376138	0.55677	0.284827	0.00757871	0.115768	0.00471259	0.0120089	0.0158026	0.00180945	0.00375905	0.00147016	0.00707634	0.0299007	0.00119556
5116	3mm cylindrical power (right)	42546	0.0495024	9.74502e-05	0.000703267	0.000303085	0.00015575	5.06278e-06	0.000357945	0.000115133	0.000211715	8.6254e-05	4.88452e-05	0.000470462	0.00675129	0.00336023	0.00363612	0.0227398	0.00246662	0.00966192	0.00697308	0.00887822	0.00939824	0.00783047	0.0216781
5117	6mm cylindrical power (right)	38463	0.0663727	5.57981e-05	0.000306113	0.000132595	0.000240356	8.78133e-05	8.94507e-05	0.00010041	8.61009e-05	1.71432e-05	5.6561e-05	0.000304128	0.000534088	0.000131793	0.000489019	0.00698554	0.000298954	0.000439346	0.000843949	0.000318042	0.000204106	0.00123787	0.00271076
5118	6mm cylindrical power (left)	38294	0.0652999	0.00150532	0.0122262	0.00130211	0.00955189	0.000364755	0.00212292	0.00467352	0.00092624	0.00256632	0.000886181	0.00051152	0.000677172	0.000485921	0.000681801	0.00840685	0.000191	0.000942843	0.00225257	0.0018132	0.000141111	0.000339078	0.00369193
5119	3mm cylindrical power (left)	42572	0.0743165	0.00178481	0.00372425	0.00824563	0.00306251	0.000107291	0.00405877	0.00380512	0.0063048	0.00188786	0.000905486	0.00439828	4.71624e-05	0.000164083	6.72289e-05	0.000773882	6.66688e-07	0.000177222	3.72424e-05	0.00257836	5.55488e-05	1.70366e-05	0.000400477
5132	3mm strong meridian (right)	42546	-0.212502	7.22977e-30	5.45644e-29	1.35013e-30	1.16482e-27	1.57817e-26	8.10459e-31	1.51476e-29	1.57221e-27	4.83906e-29	3.47749e-32	4.48131e-43	2.66335e-31	1.10052e-30	5.34979e-31	1.09983e-28	1.12153e-26	7.93536e-34	1.32002e-32	8.04939e-31	1.27411e-32	8.40371e-40	5.65624e-37
5133	6mm strong meridian (right)	38463	-0.220028	9.87e-24	4.53108e-24	5.62601e-25	1.13113e-21	1.47271e-19	6.99331e-25	1.14903e-23	3.26547e-23	1.50724e-23	1.18232e-25	1.73716e-34	1.49696e-30	5.99533e-30	7.02046e-30	7.87414e-27	1.31012e-24	1.99676e-33	1.18829e-32	6.40824e-32	3.27481e-32	2.12716e-39	3.39419e-36
5134	6mm strong meridian (left)	38294	-0.228629	5.95279e-24	7.32356e-23	2.02496e-24	6.50062e-23	6.20821e-22	4.94059e-25	3.2784e-23	8.73476e-23	2.32844e-24	3.81729e-26	8.59219e-36	1.05524e-32	7.63713e-33	2.06561e-32	3.83535e-30	1.74052e-26	3.06123e-35	2.03404e-33	1.72544e-31	3.02086e-34	2.66828e-42	2.27835e-38
5135	3mm strong meridian (left)	42572	-0.217178	5.14214e-30	7.5771e-29	3.59464e-30	1.08535e-27	2.67398e-27	1.08166e-30	1.32617e-28	4.1818e-28	2.87363e-30	1.67287e-32	1.22907e-43	1.17666e-32	2.31634e-31	3.05182e-32	6.37883e-30	1.02792e-28	4.59199e-35	3.08042e-34	3.2976e-30	1.68772e-33	1.99416e-41	2.9807e-38
5136	3mm keratometry result unreliable (left)	11177	0	1	1	1	1	1	1	1	1	1	1	1	1	1	1	1	1	1	1	1	1	1	1
5138	6mm keratometry result unreliable (left)	126940	0	1	1	1	1	1	1	1	1	1	1	1	1	1	1	1	1	1	1	1	1	1	1
5139	6mm keratometry result unreliable (right)	124693	0	1	1	1	1	1	1	1	1	1	1	1	1	1	1	1	1	1	1	1	1	1	1
5140	3mm keratometry result unreliable (right)	10738	0	1	1	1	1	1	1	1	1	1	1	1	1	1	1	1	1	1	1	1	1	1	1
5141	3mm asymmetry index unreliable (left)	21526	0	1	1	1	1	1	1	1	1	1	1	1	1	1	1	1	1	1	1	1	1	1	1
5142	6mm asymmetry index unreliable (left)	72683	0	1	1	1	1	1	1	1	1	1	1	1	1	1	1	1	1	1	1	1	1	1	1
5143	6mm asymmetry index unreliable (right)	70658	0	1	1	1	1	1	1	1	1	1	1	1	1	1	1	1	1	1	1	1	1	1	1
5144	3mm asymmetry index unreliable (right)	20342	0	1	1	1	1	1	1	1	1	1	1	1	1	1	1	1	1	1	1	1	1	1	1
5145	3mm regularity index unreliable (right)	20376	0	1	1	1	1	1	1	1	1	1	1	1	1	1	1	1	1	1	1	1	1	1	1
5146	6mm regularity index unreliable (right)	70879	0	1	1	1	1	1	1	1	1	1	1	1	1	1	1	1	1	1	1	1	1	1	1
5147	6mm regularity index unreliable (left)	72769	0	1	1	1	1	1	1	1	1	1	1	1	1	1	1	1	1	1	1	1	1	1	1
5148	3mm regularity index unreliable (left)	21542	0	1	1	1	1	1	1	1	1	1	1	1	1	1	1	1	1	1	1	1	1	1	1
5149	3mm regularity index for irregular astigmatism level (left)	42002	-0.303259	1.85911e-07	6.41593e-06	4.41686e-05	1.96995e-06	6.27485e-09	5.34608e-07	8.29285e-07	8.62528e-07	1.24337e-07	1.7451e-08	4.10313e-06	0.00803418	0.00310181	0.015249	0.0305433	0.000409262	0.00373458	0.00161979	0.0161929	0.00427401	0.00645542	0.0134683
5152	3mm asymmetry index for irregular astigmatism level (right)	42015	-0.288829	0.00128077	0.00504747	0.00450306	0.00273128	0.00762932	0.00224363	0.00146519	0.00147463	0.00161779	0.00134213	0.00171169	0.0686029	0.12948	0.07869	0.0539409	0.1143	0.083138	0.0860335	0.151208	0.0678259	0.0407047	0.0353698
5155	3mm asymmetry index for irregular astigmatism level (left)	41995	-0.306966	0.00206283	0.0260101	0.00844111	0.00699065	0.000147965	0.00301366	0.00257038	0.00717421	0.0145099	0.0017259	0.000506101	0.0634671	0.140559	0.054415	0.0302922	0.0226355	0.0477331	0.233782	0.0945855	0.0306062	0.0796277	0.174412
5156	3mm asymmetry index (left)	41995	-0.0471468	2.68621e-06	0.000213122	3.99238e-05	9.97993e-06	6.26002e-08	2.75234e-06	6.70549e-06	6.15479e-06	5.61581e-06	7.45105e-07	1.85011e-07	0.0102251	0.0702736	0.0103963	0.0208147	0.00165342	0.00715239	0.0154579	0.0186619	0.00663634	0.00601135	0.0121653
5157	6mm asymmetry index (left)	25578	-0.0615711	0.0914359	0.11631	0.113624	0.0728902	0.0503063	0.0877534	0.192813	0.189179	0.0919413	0.0359366	0.0867767	0.00836297	0.035538	0.00446631	0.0344061	0.00353427	0.00805344	0.0160791	0.0257176	0.0362542	0.00890761	0.00202265
5158	6mm asymmetry index (right)	25948	-0.0574567	0.00356615	0.0208439	0.00602982	0.0209628	0.000819573	0.00450576	0.0023793	0.00245528	0.000815159	0.00505242	0.0781889	0.0125457	0.0703243	0.00579311	0.0394304	0.003329	0.0137555	0.0315626	0.0139483	0.0155084	0.0318365	0.00297594
5159	3mm asymmetry index (right)	42015	-0.0913542	9.80449e-11	1.56368e-07	1.73648e-08	3.75451e-09	2.56285e-10	1.05576e-10	1.38768e-10	7.82164e-12	1.62825e-11	3.91128e-11	8.39676e-09	6.50413e-07	6.43856e-05	6.52146e-07	4.74663e-06	4.19969e-07	6.37388e-07	1.02062e-05	1.47168e-07	1.04692e-07	1.19333e-06	2.29457e-06
5160	3mm regularity index (right)	42023	-0.104722	2.36712e-08	4.08182e-06	7.52553e-06	7.16835e-07	2.29336e-08	5.15163e-08	1.94146e-08	1.06925e-07	1.01139e-08	2.45155e-09	8.20263e-12	1.16389e-08	4.18873e-05	7.74542e-08	3.8778e-07	2.74063e-11	5.7648e-09	1.42988e-08	1.42228e-08	1.24421e-09	2.03937e-08	1.63305e-08
5161	6mm regularity index (right)	25994	-0.0572353	0.0239522	0.0461794	0.104372	0.0669096	0.0275984	0.0163615	0.0211204	0.022094	0.0120324	0.0079742	0.0432395	0.0128377	0.0431239	0.0123977	0.0766457	0.112945	0.0105131	0.0109112	0.00544999	0.00341876	0.0197323	0.00132869
5162	6mm regularity index (left)	25590	-0.0929016	0.0164306	0.0778271	0.104466	0.0960536	0.00606982	0.013614	0.0240526	0.007877	0.0166206	0.00436627	0.00208204	6.90031e-05	0.0010041	7.13796e-05	0.000126792	3.07556e-05	0.000121891	2.79269e-05	0.00036808	7.44427e-05	0.000106762	1.29399e-05
5163	3mm regularity index (left)	42002	-0.0998485	9.94097e-15	2.76004e-11	1.67757e-10	1.11096e-11	8.72725e-18	1.90547e-14	1.56479e-13	2.17816e-15	3.4601e-15	2.51872e-16	4.6627e-14	5.32037e-08	9.86128e-06	4.20019e-07	2.30323e-06	1.95553e-09	1.85897e-08	5.52623e-09	4.69755e-07	1.04771e-08	2.69739e-08	4.55183e-07
5164	3mm regularity index for irregular astigmatism level (right)	42023	-0.206164	0.000365385	0.00152562	0.00152527	0.00471972	0.00132346	0.000753662	0.000456565	0.000562705	0.000994934	0.000123857	3.42714e-05	0.0699743	0.229755	0.107678	0.0571196	0.0502284	0.0300513	0.117272	0.138124	0.0619207	0.0993012	0.0673594
5181	Ever had eye surgery	45342	-0.218045	8.25873e-06	9.5847e-06	1.51427e-05	1.8379e-05	6.79043e-07	5.89387e-06	2.56136e-05	1.9811e-06	1.31231e-06	3.43032e-08	0.000226136	0.00168577	0.00309621	0.00145128	0.00102142	0.00209126	0.000399318	0.00237911	5.44616e-07	0.00233133	0.00112822	0.366559
5182	Both eyes present	45342	-1.48381	0.0519925	0.124786	0.00599643	0.0134326	0.0244873	0.055886	0.0498614	0.0867503	0.204978	0.0643944	0.198247	0.071903	0.204029	0.0710318	0.108851	0.0378261	0.0871713	0.067919	0.10835	0.0159637	0.085481	0.0539497
5183	Current eye infection	138194	0	1	1	1	1	1	1	1	1	1	1	1	1	1	1	1	1	1	1	1	1	1	1
41	Seating box device ID	560293	0	1	1	1	1	1	1	1	1	1	1	1	1	1	1	1	1	1	1	1	1	1	1
5185	Visual acuity measured (right)	45249	-0.562275	4.19801e-06	2.60369e-06	1.62432e-05	4.43099e-06	1.75808e-05	3.91641e-06	1.04409e-06	0.001602	3.8323e-06	5.86485e-06	2.08492e-06	0.0818643	0.0623263	0.046897	0.0217272	0.0923672	0.110933	0.0464133	0.204078	0.0891769	0.0696727	0.105976
5186	Duration visual-acuity screen displayed (right)	45249	-0.073623	9.42324e-07	1.18353e-05	1.78735e-05	3.2929e-07	8.35011e-10	2.21133e-06	3.5571e-06	4.20226e-07	3.75649e-07	2.53671e-08	0.0340334	3.36757e-05	1.38313e-08	0.000107492	5.21676e-05	6.70025e-08	1.90367e-05	3.48634e-05	6.39196e-05	0.000364458	2.08079e-05	0.19693
5187	Visual acuity measured (left)	45250	-0.186592	1.77192e-05	9.15153e-06	1.75574e-05	2.70876e-05	9.37561e-05	2.53461e-05	1.62485e-05	0.00457117	6.09596e-06	2.09687e-05	1.70312e-06	0.530225	0.595199	0.515295	0.566147	0.10196	0.533674	0.259021	0.390654	0.415809	0.453038	0.506852
5188	Duration visual-acuity screen displayed (left)	45250	-0.101779	4.65669e-11	5.42972e-11	1.28635e-08	3.0221e-12	8.10935e-18	6.06412e-11	8.59825e-11	5.15794e-07	9.15796e-12	1.85527e-12	1.62511e-05	9.85229e-09	5.42616e-11	5.35351e-07	7.57585e-08	5.09444e-17	4.05726e-09	1.33071e-09	9.25945e-05	5.64317e-07	5.30409e-09	0.00372188
5189	Auto-refraction method (right)	44762	-0.453616	0.0014942	0.00532544	0.00293284	0.0025906	0.00390624	0.00119111	0.000853555	0.00801078	0.00023278	0.00150384	0.00178846	0.0591867	0.078987	0.0713	0.0497852	0.200212	0.0293541	0.0503893	0.054333	0.0130997	0.0448454	0.0560465
5190	Duration at which refractometer first shown (right)	44762	-0.103163	2.69976e-15	4.51893e-16	5.76071e-12	1.12035e-16	3.93909e-23	8.756e-15	1.26926e-14	7.60463e-09	3.84489e-15	5.47824e-16	3.14464e-09	7.37809e-09	1.36534e-12	3.52948e-07	5.00624e-08	3.25538e-17	1.8879e-09	1.62324e-09	0.000882815	9.86556e-07	3.47177e-09	0.00105227
5191	Auto-refraction method (left)	44761	-0.458256	0.00809368	0.0380899	0.00812617	0.003638	0.0124781	0.00937095	0.00535255	0.0148364	0.00189065	0.00532043	0.00741398	0.0243229	0.0566043	0.0240181	0.0673095	0.0220149	0.00807347	0.0126514	0.0275146	0.00551615	0.0121928	0.0204124
5193	Duration at which refractometer first shown (left)	44761	-0.125844	1.56087e-16	9.49001e-16	1.89174e-12	5.8301e-17	2.8421e-25	1.38737e-15	4.7619e-16	6.06824e-10	2.38957e-17	2.07077e-17	4.38254e-12	1.74601e-12	2.16455e-17	2.53806e-10	1.03046e-11	8.48437e-22	5.49017e-13	1.999e-13	1.33026e-05	1.22345e-10	1.53766e-12	8.66069e-07
5194	Intra-ocular pressure (IOP) method (right)	44762	-0.306929	1.13262e-05	0.003411	6.28476e-05	3.62704e-06	0.000168688	1.14001e-05	3.06458e-06	0.000100598	1.72526e-06	7.17372e-06	2.22283e-07	0.0089256	0.0500457	0.00516378	0.00266891	0.00157381	0.00679478	0.002367	0.0272843	0.028462	0.00641301	0.0123231
5196	Intra-ocular pressure (IOP) method (left)	44761	-0.342459	1.32631e-07	9.56967e-05	9.86233e-07	5.1265e-08	4.71969e-08	2.02351e-07	4.68479e-08	3.06646e-06	1.98837e-08	1.18661e-07	3.27843e-09	0.0026829	0.0451272	0.00260485	0.00162574	0.00025501	0.00410692	0.00102115	0.0180035	0.00930408	0.00205308	0.00109846
5198	Eye measures duration	45342	-0.0754744	0.839487	0.169425	0.566688	0.0711964	0.678123	0.570796	0.00876531	0.876265	0.244046	0.680256	0.259465	2.08942e-05	0.00119832	0.000405634	7.67121e-08	6.74951e-07	6.29127e-05	3.81591e-09	0.000261903	8.00134e-09	0.000146129	0.000541858
5199	logMAR, initial (right)	45092	-0.178337	5.30751e-23	1.08596e-18	9.71778e-21	9.5097e-21	2.54538e-23	3.111e-23	1.63021e-22	1.25725e-18	1.05837e-23	1.32678e-27	2.12865e-30	1.11652e-23	1.18769e-18	1.008e-22	2.52834e-23	5.91641e-26	4.31182e-25	2.51809e-24	3.56941e-17	2.20526e-25	6.98644e-23	2.172e-26
5200	Final number of letters displayed (right)	45092	0.0451732	0.000758082	0.00315999	0.00129334	0.000657354	0.00216403	0.000492622	0.00081876	0.00162427	9.52747e-05	6.6255e-05	0.0039385	0.0111014	0.0061644	0.0100233	0.0101823	0.00994335	0.0120455	0.0167052	0.0411795	0.0121015	0.0240174	0.0150913
5201	logMAR, final (right)	44736	-0.208067	2.66174e-32	5.0531e-26	4.30401e-30	4.09021e-29	1.63306e-32	1.88822e-32	2.76111e-32	1.02995e-27	1.04917e-32	1.37471e-37	1.26417e-42	1.91439e-31	7.04946e-25	2.30452e-30	6.93536e-31	7.46633e-31	5.00165e-32	6.14159e-33	3.62662e-22	2.71224e-35	2.95056e-30	4.20662e-37
5202	Number of rounds to result (right)	45092	0.0131635	0.203904	0.255718	0.122401	0.152227	0.231935	0.217203	0.187495	0.0847371	0.198151	0.228438	0.407295	0.459308	0.313631	0.456813	0.564988	0.778696	0.685645	0.376723	0.625163	0.320912	0.604781	0.23968
5204	Distance of viewer to screen (right)	45092	0.0118489	0.517223	0.373607	0.619306	0.665433	0.593023	0.554418	0.538321	0.32685	0.243934	0.633892	0.991511	0.505357	0.420766	0.586029	0.460314	0.555218	0.442247	0.713471	0.973492	0.564527	0.499978	0.349472
5205	Direct or mirror view (right)	45092	-1.26696	0.00237812	0.189591	0.00527095	0.0019166	0.0107458	0.0054318	0.000743245	0.032357	0.000101357	0.00313064	8.13601e-06	8.93674e-06	0.057464	1.59558e-05	2.50382e-06	7.31421e-05	1.51307e-05	1.2752e-09	0.000168323	2.2331e-06	1.34939e-05	1.31972e-05
5206	logMAR, initial (left)	45065	-0.162001	1.58272e-29	6.93465e-24	1.7187e-26	1.59396e-25	5.37386e-29	3.55247e-29	6.95953e-31	3.18074e-24	2.78196e-28	4.70127e-32	1.69321e-40	8.21665e-20	2.94984e-15	9.56155e-19	2.52789e-19	4.34969e-21	2.48543e-20	1.44616e-20	4.42825e-15	1.84646e-20	1.90764e-20	2.49231e-23
5207	Final number of letters displayed (left)	45065	0.0700232	0.0281447	0.0558643	0.0115116	0.0863835	0.00546339	0.0236319	0.00946782	0.345351	0.0463575	0.00980209	0.0626977	8.27312e-05	5.23576e-05	8.10565e-05	7.44832e-05	3.44878e-05	0.000119182	0.00012087	0.00390618	0.000352975	0.000138149	3.94516e-05
5208	logMAR, final (left)	44700	-0.18747	5.8916e-35	8.91397e-27	2.02306e-31	6.73065e-32	1.53773e-32	1.06695e-34	6.27028e-37	6.0063e-28	4.18798e-34	6.18262e-39	5.01899e-51	7.92431e-26	1.96119e-19	1.46204e-24	5.31926e-24	7.98181e-27	1.57887e-26	4.53876e-26	1.77707e-19	2.58061e-28	3.26181e-26	2.20452e-32
5209	Number of rounds to result (left)	45065	0.0282214	0.422699	0.211861	0.59994	0.639557	0.423709	0.487892	0.451739	0.0832433	0.618823	0.647789	0.768024	0.11266	0.13879	0.101136	0.283737	0.190971	0.131713	0.164305	0.28145	0.0677317	0.166414	0.0261961
5211	Distance of viewer to screen (left)	45065	0.0118199	0.517032	0.373451	0.619021	0.665456	0.592785	0.554235	0.538227	0.326791	0.243641	0.633695	0.992178	0.506435	0.421681	0.587381	0.461573	0.555733	0.443085	0.714436	0.971877	0.565956	0.500997	0.350395
5212	Direct or mirror view (left)	45065	-1.26517	0.00236662	0.189205	0.00524119	0.00192122	0.0106943	0.00540938	0.000741743	0.0322618	9.99379e-05	0.00311857	7.96678e-06	9.15955e-06	0.0581901	1.6414e-05	2.58655e-06	7.39344e-05	1.5437e-05	1.30402e-09	0.00017265	2.31277e-06	1.38025e-05	1.35607e-05
5214	Auto-refractor device ID (right)	43928	0.00557118	0.02185	0.626128	0.000223054	0.000589967	0.00977295	0.0108312	0.0796349	0.00129399	0.0368656	0.00036781	2.34005e-05	0.756927	0.0059812	0.27553	0.34473	0.455445	0.202682	0.308454	0.284149	0.530159	0.221937	1.52998e-05
5215	Vertex distance (right)	43928	0	1	1	1	1	1	1	1	1	1	1	1	1	1	1	1	1	1	1	1	1	1	1
5221	Index of best refractometry result (right)	43928	0.00612195	0.134567	0.228837	0.161195	0.334999	0.0938368	0.0748556	0.115863	0.0188271	0.279046	0.161804	0.326943	0.733767	0.289955	0.758207	0.749937	0.874523	0.699539	0.721088	0.753782	0.918053	0.692567	0.599266
5237	3mm index of best keratometry results (right)	42546	0.00424853	0.000205275	0.00391099	0.000359396	0.000463097	0.000732903	0.000323474	4.29158e-05	0.000372179	3.8505e-05	0.000425316	0.0070988	0.816167	0.368978	0.697542	0.538426	0.708929	0.956881	0.689228	0.910161	0.413851	0.961228	0.887248
5251	6mm index of best keratometry results (right)	38463	0.00285927	0.605565	0.898344	0.453314	0.411837	0.980308	0.645995	0.634717	0.791162	0.284398	0.610703	0.773522	0.881417	0.278664	0.816926	0.631804	0.674316	0.953906	0.854376	0.690222	0.637432	0.799118	0.557146
5253	Intra-ocular pressure device ID (right)	68191	0	1	1	1	1	1	1	1	1	1	1	1	1	1	1	1	1	1	1	1	1	1	1
5254	Intra-ocular pressure, corneal-compensated (right)	43046	0.00963216	0.00197705	0.125219	0.0120463	0.0549208	1.44588e-13	0.00543582	0.00222163	0.000257913	0.00304285	0.00156142	0.00242168	0.596063	0.0170951	0.611077	0.487457	3.96377e-13	0.937765	0.930984	0.954125	0.0829123	0.836504	0.60154
5255	Intra-ocular pressure, Goldmann-correlated (right)	43046	-0.0291971	0.699141	0.69117	0.972417	0.0941937	9.64552e-09	0.935459	0.777433	0.812168	0.903949	0.932197	0.815049	0.108103	4.25245e-06	0.166283	0.000157415	2.29516e-09	0.0117816	0.0504523	0.00994634	0.779071	0.0146393	0.0265928
5256	Corneal hysteresis (right)	43046	-0.0308651	6.62316e-06	0.00178354	5.40741e-05	1.93264e-07	8.94964e-06	3.33808e-06	3.51052e-06	3.17263e-08	2.00675e-06	3.19609e-07	2.18633e-07	0.0893991	0.84124	0.170938	0.00716971	0.0013406	0.0502817	0.127049	0.0329718	0.0611926	0.018132	0.504326
5257	Corneal resistance factor (right)	43046	-0.0447052	0.000517911	0.00673541	0.000964278	4.45267e-07	0.42405	0.000135411	0.000291379	9.77073e-06	0.000154445	3.99498e-05	1.33695e-05	0.0138833	0.00525087	0.0370381	1.64965e-05	0.881119	0.00213805	0.0148859	0.00116111	0.0486585	0.000688076	0.0660142
5258	Applanation curve (right)	43046	0	1	1	1	1	1	1	1	1	1	1	1	1	1	1	1	1	1	1	1	1	1	1
5259	Pressure curve (right)	43046	0	1	1	1	1	1	1	1	1	1	1	1	1	1	1	1	1	1	1	1	1	1	1
5261	Intra-ocular pressure device ID (left)	68047	0	1	1	1	1	1	1	1	1	1	1	1	1	1	1	1	1	1	1	1	1	1	1
5262	Intra-ocular pressure, corneal-compensated (left)	42951	-0.0186731	0.0513541	0.699805	0.186466	0.501194	6.7489e-09	0.0535797	0.0141789	0.01177	0.0584807	0.0419981	0.010598	0.304892	1.46249e-05	0.396959	0.00429598	7.34613e-09	0.140432	0.0926754	0.289658	0.849175	0.32188	0.187716
5263	Intra-ocular pressure, Goldmann-correlated (left)	42951	-0.0219107	0.685723	0.329843	0.467521	0.0101441	3.77353e-06	0.545991	0.716666	0.543455	0.688999	0.437212	0.388946	0.228631	2.13756e-05	0.374554	0.000277845	2.43865e-10	0.0432507	0.100066	0.101706	0.98327	0.0677438	0.0500903
5264	Corneal hysteresis (left)	42951	-0.00541815	2.17452e-05	0.0172734	0.000307419	1.0996e-06	5.49854e-05	1.17463e-05	5.36259e-07	3.13873e-08	3.26599e-05	8.47899e-07	4.568e-09	0.765932	0.169206	0.813506	0.609101	0.0884072	0.56139	0.814118	0.681138	0.301189	0.254096	0.494504
5265	Corneal resistance factor (left)	42951	-0.012712	0.000269517	0.0168592	0.00101689	1.75241e-07	0.303899	0.000114776	2.2071e-05	1.58895e-06	0.000383642	1.20056e-05	1.97974e-07	0.484887	0.466107	0.610486	0.0506989	0.128878	0.184865	0.669261	0.290563	0.45642	0.0923047	0.175523
5266	Applanation curve (left)	42951	0	1	1	1	1	1	1	1	1	1	1	1	1	1	1	1	1	1	1	1	1	1	1
5267	Pressure curve (left)	42951	0	1	1	1	1	1	1	1	1	1	1	1	1	1	1	1	1	1	1	1	1	1	1
5270	Optical-coherence tomography device ID	99299	0	1	1	1	1	1	1	1	1	1	1	1	1	1	1	1	1	1	1	1	1	1	1
5273	Auto-refractor device ID (left)	43773	0.00555633	0.00970915	0.463028	6.82448e-05	0.000203359	0.00418029	0.00484144	0.041125	0.000473888	0.016936	0.000106618	0.000114693	0.7579	0.00754958	0.287581	0.373414	0.485551	0.194999	0.294968	0.329406	0.533547	0.230045	1.61983e-05
5274	Vertex distance (left)	43773	0	0.709532	0.443247	0.846206	0.985379	0.67441	0.706464	0.660473	0.693335	0.72626	0.759178	0.724886	1	1	1	1	1	1	1	1	1	1	1
5276	Index of best refractometry result (left)	43773	-0.0327563	0.207566	0.264823	0.158148	0.21439	0.315233	0.173781	0.288573	0.151399	0.145111	0.203562	0.39678	0.0691867	0.119646	0.0895133	0.142697	0.104045	0.165708	0.0740976	0.135484	0.0171531	0.0899669	0.0384674
5292	3mm index of best keratometry results (left)	42572	0.0379778	2.07468e-05	0.000109817	0.000179522	3.3666e-05	3.61946e-05	2.92125e-05	2.43481e-05	2.88735e-06	1.60585e-05	0.000106669	0.000139658	0.0375846	0.485341	0.0393934	0.0587055	0.037778	0.0292793	0.0149943	0.121313	0.00649757	0.0219354	0.126464
5306	6mm index of best keratometry results (left)	38294	0.0216226	0.00371706	0.0117056	0.0294664	0.00308095	0.00396514	0.00791721	0.00759606	0.000595178	0.00108782	0.00199976	0.0113158	0.260456	0.880469	0.232852	0.244164	0.24328	0.0809144	0.20745	0.388776	0.161966	0.29922	0.228408
42	Spirometer device ID	548284	0	1	1	1	1	1	1	1	1	1	1	1	1	1	1	1	1	1	1	1	1	1	1
5324	Ever had cataract surgery	3256	-0.809788	0.00369579	0.006422	0.00279852	0.00465801	0.00361793	0.00279841	0.00435919	0.00227095	0.00673704	0.00180745	0.0175364	3.2641e-05	0.000212875	6.11935e-05	0.000453852	1.05801e-05	2.11055e-05	0.000168815	7.02279e-06	2.70278e-05	5.7082e-05	0.000200368
5325	Ever had refractive laser eye surgery	3256	0.787157	0.000622531	0.00109963	0.000410673	0.00121221	0.00195148	0.000543177	0.00033152	0.0124563	0.000465829	0.000287461	0.00108248	2.78387e-06	1.63407e-05	7.72247e-06	1.55849e-06	7.50504e-07	3.14712e-07	5.08986e-07	0.000782341	1.65019e-06	2.05104e-06	6.88202e-05
5326	Ever had surgery for glaucoma or high eye pressure	3256	-1.35473	0.404728	0.615807	0.362684	0.431254	0.394817	0.306316	0.56632	0.394455	0.44476	0.328795	0.399357	0.17108	0.297797	0.157708	0.23981	0.153926	0.156872	0.165832	0.10443	0.20953	0.179461	0.236154
5327	Ever had laser treatment for glaucoma or high eye pressure	3256	-1.94996	0.0309787	0.0785136	0.0184979	0.0336587	0.0215403	0.0166718	0.0835007	0.0159619	0.0750435	0.0128301	0.0221143	0.1303	0.0495435	0.109	0.126009	0.196546	0.148696	0.109873	0.125801	0.144797	0.139369	0.261447
5328	Ever had corneal graft surgery	3256	0.832565	0.0333801	0.0729583	0.0321302	0.0475498	0.0578602	0.0483041	0.0502568	0.0435146	0.0453788	0.0319859	0.0123763	0.281239	0.221446	0.375938	0.281687	0.384846	0.422976	0.404667	0.422827	0.300714	0.249084	0.305942
5364	Average weekly intake of other alcoholic drinks	44352	-0.0649834	0.285231	0.684631	0.320123	0.198992	0.11392	0.269599	0.345047	0.0471586	0.212759	0.43527	0.0793664	0.000213975	0.000751498	0.00026052	9.57605e-05	0.000124817	8.35483e-05	0.00177775	0.00804399	2.24623e-05	0.000266912	1.40197e-05
5375	Longest period of unenthusiasm / disinterest	20020	0.0207484	0.000666489	0.0036747	0.000576559	0.000493549	0.019163	0.000566375	0.000472442	0.00560946	0.00577921	0.000641881	0.00010735	0.449595	0.535823	0.2997	0.301585	0.714695	0.232723	0.282789	0.721381	0.173258	0.345616	0.116681
5386	Number of unenthusiastic/disinterested episodes	19020	0.0100213	0.0108807	0.0916878	0.0170213	0.00575442	0.0461104	0.01859	0.0220931	0.0132824	0.0178067	0.0088086	0.0453	0.722534	0.548538	0.492652	0.424475	0.522274	0.530141	0.334588	0.0924747	0.619979	0.428353	0.386278
5408	Which eye(s) affected by amblyopia (lazy eye)	1656	0.49487	0.0492296	0.122377	0.0357722	0.0752813	0.103327	0.03972	0.031337	0.140855	0.0467033	0.0422933	0.0701783	0.0147438	0.00779951	0.00716717	0.0445041	0.0277081	0.018777	0.00488379	0.0789856	0.0134965	0.0156078	0.0417932
5419	Which eye(s) affected by injury or trauma resulting in loss of vision	224	-1.37231	0.628434	0.442706	0.408634	0.671757	0.575835	0.754952	0.536784	0.739811	0.936174	0.644081	0.246212	0.0962278	0.182456	0.115931	0.0960116	0.129553	0.103249	0.0580416	0.251387	0.195516	0.0676058	0.0983596
5430	Age when loss of vision due to injury or trauma diagnosed	214	-0.31965	0.680998	0.528572	0.59906	0.809236	0.550216	0.616011	0.664935	0.550595	0.62153	0.719309	0.849061	0.236563	0.549769	0.180695	0.0208793	0.262296	0.264553	0.47283	0.269837	0.519197	0.333326	0.226714
43	Impedance device ID	560304	0	1	1	1	1	1	1	1	1	1	1	1	1	1	1	1	1	1	1	1	1	1	1
5441	Which eye(s) are affected by cataract	2528	-0.241243	0.143017	0.0910057	0.172214	0.418938	0.282875	0.166433	0.134403	0.163446	0.127476	0.102911	0.0699636	0.369299	0.326651	0.324078	0.796144	0.507098	0.373933	0.552874	0.0675866	0.439841	0.284874	0.414045
5452	Leg pain when standing still or sitting	50276	0	1	1	1	1	1	1	1	1	1	1	1	1	1	1	1	1	1	1	1	1	1	1
5463	Leg pain in calf/calves	50822	0	1	1	1	1	1	1	1	1	1	1	1	1	1	1	1	1	1	1	1	1	1	1
5474	Leg pain when walking uphill or hurrying	50026	0	1	1	1	1	1	1	1	1	1	1	1	1	1	1	1	1	1	1	1	1	1	1
5485	Leg pain when walking normally	50667	0	1	1	1	1	1	1	1	1	1	1	1	1	1	1	1	1	1	1	1	1	1	1
5496	Leg pain when walking ever disappears while walking	27149	0	1	1	1	1	1	1	1	1	1	1	1	1	1	1	1	1	1	1	1	1	1	1
5507	Leg pain on walking : action taken	15063	1.02232	0.00330024	0.0059766	0.00712244	0.0100226	0.00137922	0.00296923	0.00613019	0.0128577	0.00591969	0.00271925	0.000667301	0.00025139	0.00471496	0.00017386	0.000407922	0.000404809	0.000458574	0.000212591	0.00117658	0.000175301	0.000450888	0.000116642
5518	Leg pain on walking : effect of standing still	15063	-1.04492	0.0155578	0.00919497	0.00186684	0.0571888	0.08428	0.0185611	0.0129667	0.00220678	0.00938561	0.0114391	0.082939	0.022121	0.0336619	0.0232797	0.0156855	0.06429	0.0288965	0.0202097	0.00232412	0.0178409	0.0229199	0.074355
5529	Surgery on leg arteries (other than for varicose veins)	51913	0	1	1	1	1	1	1	1	1	1	1	1	1	1	1	1	1	1	1	1	1	1	1
5540	Surgery/amputation of toe or leg	15063	-1.86361	0.208369	0.179862	0.161613	0.261214	0.197259	0.215878	0.146846	0.142545	0.256932	0.130146	0.105356	0.00906936	0.0027086	0.011037	0.00603551	0.00430162	0.0138732	0.0171759	0.019653	0.00600541	0.00548897	0.03007
5556	FI9 : concept interpolation	19997	1.65833	2.328e-08	4.14199e-10	1.8671e-08	1.55394e-07	1.25205e-09	1.32287e-08	1.894e-09	0.000128126	1.41151e-07	9.62286e-09	1.64826e-09	1.03991e-16	1.20199e-15	1.65883e-17	1.87242e-18	5.31988e-20	6.79215e-18	1.02911e-15	2.36822e-11	1.11334e-16	1.7186e-16	4.40415e-19
44	Tape measure device ID	560372	0	1	1	1	1	1	1	1	1	1	1	1	1	1	1	1	1	1	1	1	1	1	1
5610	Which eye(s) affected by presbyopia	18182	0.383387	0.00450365	0.0125742	0.0034176	0.000923473	0.00200361	0.00946022	0.00899022	0.0188891	0.00224557	0.000745309	0.0142946	0.00280341	0.00796845	0.00270104	0.00459073	0.000671851	0.000387002	0.000209771	0.0145775	0.00338252	0.00241763	0.00667107
1120	Weekly usage of mobile phone in last 3 months	184030	0.890875	5.28308e-52	8.63279e-55	9.82028e-47	5.39171e-52	3.15551e-52	4.18329e-53	2.2814e-54	9.20388e-38	5.22468e-51	1.19134e-53	5.40562e-61	3.90305e-31	6.41661e-34	4.44062e-30	2.70938e-35	3.0123e-34	3.24076e-30	4.96186e-34	1.87184e-16	3.13052e-33	2.68808e-31	1.48002e-33
5663	Length of longest manic/irritable episode	14105	-0.924084	0.0637724	0.0667661	0.080424	0.106538	0.138492	0.0688486	0.0718725	0.186496	0.0907246	0.047152	0.00960547	0.0111843	0.00549901	0.0112737	0.0412489	0.00967754	0.0158275	0.00914441	0.0283166	0.00322875	0.00387125	0.072647
5674	Severity of manic/irritable episodes	14105	-0.845622	0.0786179	0.0644203	0.11039	0.0357334	0.294665	0.0764247	0.187314	0.0844854	0.0618412	0.0998921	0.00451781	0.00709416	0.00342452	0.00638969	0.0427917	0.0158483	0.0400103	0.00855067	0.00824903	0.00722013	0.00335349	0.00955815
103980	No fat for cooking	89338	0	1	1	1	1	1	1	1	1	1	1	1	1	1	1	1	1	1	1	1	1	1	1
45	Heel ultrasound device id	557273	0	1	1	1	1	1	1	1	1	1	1	1	1	1	1	1	1	1	1	1	1	1	1
103990	Vegetable consumers	458607	0	1	1	1	1	1	1	1	1	1	1	1	1	1	1	1	1	1	1	1	1	1	1
104000	Baked bean intake	2015	-0.687484	0.0790506	0.0507227	0.0469479	0.0942221	0.031669	0.0805806	0.0516384	0.0179793	0.0572348	0.0880252	0.0803003	0.0187489	0.00241127	0.0131629	0.0326391	0.0814658	0.0244147	0.0169493	0.0607622	0.0159979	0.0114462	0.0154344
5699	FI10 : arithmetic sequence recognition	13697	0.971857	4.85142e-15	6.77751e-21	1.75324e-14	1.96146e-15	6.13844e-15	1.48774e-15	8.2731e-16	2.69335e-07	3.09582e-14	1.70878e-16	8.34777e-19	4.69075e-29	3.9161e-24	7.06179e-29	3.0855e-30	5.45566e-34	3.69581e-31	1.5476e-31	1.0465e-15	5.40183e-29	3.89709e-31	1.07767e-34
104010	Pulses intake	2542	0.399166	0.122679	0.0830036	0.105527	0.116934	0.172004	0.146214	0.07054	0.0272409	0.0529871	0.152895	0.0753578	0.295438	0.21967	0.262757	0.209983	0.314141	0.257486	0.220611	0.603524	0.312882	0.255443	0.383075
104020	Fried potatoes intake	5039	-0.355063	0.0777128	0.110363	0.106138	0.149957	0.0528384	0.109317	0.0455893	0.190986	0.0755542	0.0718757	0.0635095	0.146736	0.244839	0.171025	0.115483	0.181112	0.187746	0.166517	0.145093	0.0973549	0.103351	0.179016
104030	Boiled/baked potatoes intake	7896	-0.547198	0.00776032	0.021008	0.0198183	0.0342555	0.0315097	0.00563306	0.0152164	0.0154074	0.00306732	0.00401744	0.00046293	0.0745174	0.0100967	0.0806824	0.165387	0.0504675	0.0646723	0.0408043	0.0751598	0.0600245	0.0564054	0.0636056
104040	Butter/margarine added to potatoes	1037	0	1	1	1	1	1	1	1	1	1	1	1	1	1	1	1	1	1	1	1	1	1	1
104050	Mashed potato intake	2896	0.344536	0.169211	0.202872	0.123132	0.168215	0.150431	0.179382	0.159596	0.157058	0.273334	0.299491	0.425246	0.2598	0.0220194	0.255953	0.253545	0.244285	0.194948	0.278338	0.514721	0.0964352	0.158832	0.0679835
104060	Mixed vegetable intake	2853	0.593869	0.35768	0.254375	0.25859	0.505137	0.188366	0.259166	0.369369	0.293948	0.391494	0.327477	0.621333	0.100246	0.179706	0.106558	0.0381418	0.272656	0.0969806	0.147983	0.0863202	0.0464273	0.100812	0.021858
104070	Vegetable pieces intake	3693	-0.133357	0.0559518	0.0495338	0.0324114	0.136627	0.0931423	0.0469567	0.0531479	0.0268645	0.0306141	0.101112	0.0816526	0.542362	0.570217	0.452537	0.713707	0.313476	0.544771	0.472539	0.247804	0.479535	0.490014	0.176387
104080	Coleslaw intake	2017	-0.152368	0.695033	0.626025	0.582202	0.614676	0.429293	0.460148	0.576662	0.401784	0.54831	0.341747	0.416964	0.450114	0.345351	0.393751	0.56496	0.331393	0.475911	0.337228	0.0449861	0.442999	0.374425	0.366566
5779	FI11 : antonym	6800	3.48239	0.139998	0.077305	0.167585	0.0713948	0.0375034	0.118085	0.0935003	0.185656	0.079153	0.180162	0.00845309	2.73033e-06	8.15136e-07	6.89674e-06	7.17653e-07	2.49554e-07	1.33619e-05	3.59938e-05	1.34851e-05	1.03583e-05	3.3491e-07	4.61528e-06
104090	Side salad intake	7973	0.241014	0.479212	0.350802	0.277217	0.226672	0.508357	0.414924	0.391808	0.345513	0.740451	0.397916	0.179155	0.0642732	0.249442	0.0583186	0.0326076	0.193391	0.0200235	0.0609372	0.13151	0.0286314	0.0889103	0.0505762
1150	Usual side of head for mobile phone use	184030	-1.01066	0.00140949	0.00948299	0.00227435	0.000719244	0.000359502	0.00110724	0.00359092	0.00075827	0.00310087	0.000312955	0.00041877	0.000847465	0.00165383	0.00144314	0.000147513	0.00162877	0.00100082	0.00333595	0.00427072	0.000413298	0.000309046	0.00116363
5790	FI12 : square sequence recognition	4853	0.759588	0.000175619	1.07312e-05	0.000489731	0.00136848	0.000259576	3.67016e-05	0.000161797	0.0102915	0.000115931	0.000168813	5.53484e-05	4.23336e-06	1.96241e-06	1.95578e-06	6.37565e-08	3.34609e-07	1.4084e-06	6.42492e-06	0.00314413	6.77547e-07	2.1381e-06	1.29314e-06
104100	Avocado intake	1176	0.499774	0.014242	0.0210334	0.0550092	0.00935456	0.0280218	0.0205165	0.0139753	0.0144373	0.00635879	0.00879593	0.0264153	0.124277	0.261954	0.151431	0.132409	0.216949	0.0785698	0.193963	0.165465	0.0798101	0.122604	0.0696115
104110	Broad bean intake	671	0.565187	0.268074	0.183371	0.200138	0.30049	0.180098	0.19807	0.219533	0.267032	0.306045	0.281513	0.0949614	0.150517	0.0182897	0.123751	0.254857	0.107301	0.13042	0.0894791	0.160599	0.0440911	0.11361	0.0622178
46	Hand grip strength (left)	215017	0.941932	1e-255	1e-255	1e-255	1e-255	1e-255	1e-255	1e-255	1e-255	1e-255	1e-255	1e-255	1e-255	1e-255	1e-255	1e-255	1e-255	1e-255	1e-255	1e-255	1e-255	1e-255	1e-255
104120	Green bean intake	3196	0.354683	0.408101	0.655292	0.382411	0.448175	0.186288	0.4452	0.410507	0.213486	0.478269	0.417313	0.333951	0.120919	0.0425839	0.122552	0.125651	0.218644	0.108648	0.089554	0.0956416	0.139981	0.131039	0.142171
104130	Beetroot intake	2177	-2.26731	0.259148	0.072492	0.2794	0.3452	0.566742	0.247213	0.224023	0.223198	0.259129	0.220743	0.689409	0.0797607	0.29671	0.0627473	0.0178649	0.0562532	0.133438	0.0984379	0.260441	0.0746874	0.117258	0.0222592
5832	Which eye(s) affected by hypermetropia (long sight)	9239	-0.378307	0.00122586	0.000256295	0.00200249	0.00246963	0.00037971	0.00125407	0.0042362	0.000832655	0.00306534	0.00142339	0.00634447	0.0854424	0.055596	0.0756375	0.0239625	0.051599	0.0856672	0.034094	0.0666027	0.08822	0.0629034	0.0843649
104140	Broccoli intake	4615	0.47227	0.347499	0.484555	0.286087	0.340996	0.178453	0.387938	0.351974	0.159371	0.297179	0.486508	0.456579	0.0216108	0.00196123	0.0150501	0.0886538	0.131281	0.0240075	0.0129775	0.0203854	0.0142416	0.0227068	0.0686901
5843	Which eye(s) affected by myopia (short sight)	16575	-0.258027	0.11217	0.162585	0.133911	0.127062	0.0858696	0.0693085	0.136981	0.242143	0.114273	0.0944647	0.0207906	0.150823	0.217746	0.141174	0.143144	0.138134	0.132618	0.157898	0.0766441	0.157812	0.142833	0.127088
104150	Butternut squash intake	615	0.493901	0.46331	0.235731	0.281151	0.321709	0.703846	0.310352	0.587494	0.457317	0.409772	0.366957	0.404875	0.649529	0.278418	0.595982	0.498312	0.330941	0.411811	0.400535	0.221654	0.744057	0.653855	0.502571
5855	Which eye(s) affected by astigmatism	6094	0.242302	0.0922319	0.122006	0.0986192	0.0569665	0.070379	0.14149	0.0740293	0.157584	0.0464399	0.0385791	0.248348	0.074208	0.238762	0.0772152	0.0285141	0.160496	0.0982551	0.0322801	0.157572	0.156348	0.12051	0.125382
104160	Cabbage/kale intake	2498	0.66473	0.146429	0.125537	0.129517	0.107302	0.247271	0.17905	0.131756	0.271881	0.221091	0.169529	0.0523564	0.0175495	0.0201539	0.0184423	0.022745	0.0393892	0.0089346	0.0108128	0.00654428	0.00882172	0.0189683	0.0448372
104170	Carrot intake	8628	0.202665	0.238856	0.0848145	0.244342	0.48259	0.489374	0.245736	0.156758	0.537681	0.27633	0.228167	0.113557	0.0576528	0.114924	0.0176545	0.0235401	0.0949042	0.0367212	0.0927695	0.17929	0.0538913	0.0437391	0.0380768
5866	FI13 : subset inclusion logic	2019	0.821012	0.000163441	0.000263312	0.00124891	0.000315732	0.000184708	4.28998e-05	9.28244e-05	1.45526e-05	0.000532138	0.000277593	0.0010697	0.00196251	0.00106386	0.0010995	0.00525935	0.0020174	0.00166874	0.00406867	0.0510573	0.000373587	0.00193564	0.00183348
104180	Cauliflower intake	2422	0.288824	0.373404	0.499259	0.360969	0.11284	0.250692	0.391326	0.307542	0.229199	0.337417	0.25619	0.124062	0.43126	0.363645	0.363886	0.189178	0.495277	0.272368	0.481514	0.316442	0.373358	0.383081	0.0838792
5877	Which eye(s) affected by other eye condition	679	-0.704924	0.196176	0.388819	0.283374	0.098066	0.182192	0.200806	0.250236	0.286097	0.0675031	0.181839	0.173586	0.104706	0.245547	0.101265	0.0927641	0.145379	0.107818	0.0941209	0.0916429	0.106775	0.135511	0.157976
104190	Celery intake	2696	0.799513	0.0518512	0.0241746	0.0364588	0.197413	0.215165	0.0740688	0.0459777	0.0417398	0.018618	0.0914254	0.0183491	0.00536389	0.015455	0.00422098	0.0034434	0.0368385	0.00947299	0.00847631	0.0133121	0.0102255	0.00458057	0.00142155
5890	Which eye(s) affected by diabetes-related eye disease	280	0.83733	0.927296	0.663789	0.835263	0.868663	0.762239	0.852792	0.848637	0.887552	0.907153	0.743881	0.692803	0.541254	0.423477	0.549683	0.530056	0.347623	0.439233	0.8845	0.631573	0.619106	0.586659	0.371284
104200	Courgette intake	2047	-2.40605	0.00903121	0.00221325	0.0188771	0.0211578	0.0163475	0.0102919	0.00522889	0.00947946	0.0234652	0.00456261	0.0185949	0.107387	0.121453	0.145639	0.184556	0.0850446	0.071095	0.245494	0.0441341	0.152635	0.0680397	0.287022
5901	Age when diabetes-related eye disease diagnosed	333	1.42707	1.10071e-05	3.58893e-05	2.38837e-05	0.00011419	8.77422e-06	1.15533e-05	5.33576e-05	4.66886e-05	6.75198e-05	3.26229e-06	2.27534e-07	1.21068e-06	1.36093e-06	6.25288e-07	1.89315e-06	6.68864e-07	9.57415e-07	2.43725e-05	4.24319e-06	8.023e-07	5.75382e-07	1.67547e-05
104210	Cucumber intake	5327	0.154841	0.169343	0.137821	0.0775165	0.381761	0.148215	0.256874	0.198501	0.159249	0.196601	0.162043	0.1048	0.236189	0.445043	0.2397	0.392279	0.180573	0.148745	0.215949	0.308205	0.10169	0.288591	0.106944
5912	Which eye(s) affected by macular degeneration	536	0.663819	0.261536	0.336086	0.392207	0.282033	0.239026	0.362195	0.252934	0.265323	0.293637	0.152287	0.150732	0.184936	0.185052	0.206478	0.284944	0.445613	0.0940226	0.224318	0.284863	0.110599	0.151602	0.148532
104220	Garlic intake	3028	-0.121295	0.417136	0.227817	0.414544	0.74707	0.428547	0.458583	0.368357	0.0898991	0.505745	0.441348	0.139282	0.459073	0.277055	0.416675	0.272195	0.271193	0.405226	0.407617	0.307958	0.605745	0.425573	0.517172
5923	Age macular degeneration diagnosed	516	-8.5289e-05	0.548363	0.975305	0.543042	0.545904	0.34609	0.573471	0.474281	0.415556	0.339897	0.451264	0.304792	0.999597	0.734047	0.901732	0.587053	0.939295	0.983025	0.994181	0.671767	0.975919	0.964107	0.748994
104230	Leek intake	1339	-0.555735	0.130575	0.394971	0.0983547	0.261596	0.0674477	0.132425	0.152472	0.23152	0.135988	0.0540279	0.0808937	0.033488	0.0168069	0.0381878	0.151595	0.0154487	0.0384508	0.0457468	0.0149355	0.0573994	0.0265872	0.195295
47	Hand grip strength (right)	215059	0.933232	1e-255	1e-255	1e-255	1e-255	1e-255	1e-255	1e-255	1e-255	1e-255	1e-255	1e-255	1e-255	1e-255	1e-255	1e-255	1e-255	1e-255	1e-255	1e-255	1e-255	1e-255	1e-255
5934	Which eye(s) affected by other serious eye condition	882	0.15618	0.454958	0.57769	0.408591	0.644977	0.339098	0.420403	0.409577	0.474974	0.327351	0.48072	0.252188	0.640693	0.741962	0.647918	0.56808	0.664849	0.655835	0.696256	0.1464	0.603007	0.694181	0.740581
104240	Lettuce intake	7397	-0.240595	0.124867	0.196712	0.0645393	0.187731	0.136333	0.0674138	0.10704	0.180777	0.149498	0.0816125	0.149877	0.0354763	0.0249704	0.0351028	0.087526	0.0210824	0.0498086	0.026529	0.021821	0.0648687	0.033727	0.0475252
5945	Age other serious eye condition diagnosed	854	0.260761	0.00858601	0.0399472	0.0059305	0.0289125	0.0152176	0.0109654	0.0194218	0.0325096	0.00827026	0.00837029	0.00395502	0.070002	0.143062	0.0835274	0.10757	0.0120443	0.0769255	0.0461523	0.233153	0.057293	0.0768167	0.0981065
104250	Mushroom intake	4051	-0.719164	0.16104	0.105437	0.139237	0.207225	0.151765	0.191018	0.197488	0.0962517	0.130728	0.0350141	0.329761	0.172702	0.123807	0.127998	0.165599	0.0968536	0.270478	0.284731	0.167168	0.245338	0.0981489	0.347753
104260	Onion intake	7701	0.0891859	0.0876562	0.0377687	0.0800559	0.221126	0.177775	0.109599	0.07507	0.123913	0.0645912	0.0458399	0.00938708	0.404949	0.473676	0.268802	0.118747	0.267118	0.479126	0.360198	0.393451	0.310139	0.291581	0.0626289
5959	Previously smoked cigarettes on most/all days	2769	0	1	1	1	1	1	1	1	1	1	1	1	1	1	1	1	1	1	1	1	1	1	1
104270	Parsnip intake	1054	-2.07972	0.162679	0.0945445	0.0880681	0.110596	0.0458248	0.16482	0.121785	0.248254	0.182525	0.168053	0.0981407	0.0742032	0.0496349	0.0660818	0.0388141	0.0364681	0.0856268	0.282456	0.00353522	0.139348	0.0854741	0.0679045
104280	Pea intake	3891	0.359022	8.02222e-05	9.1683e-05	9.03799e-05	0.000552982	0.00234632	0.000146925	0.00019319	9.41287e-05	0.000147401	0.000187244	0.000116244	0.332922	0.462843	0.321511	0.360062	0.152846	0.198236	0.287238	0.310179	0.355168	0.331933	0.332366
5983	ECG, heart rate	30216	0.122863	2.57635e-25	4.85327e-23	6.76507e-25	2.30668e-16	8.53011e-12	1.17226e-22	2.37891e-22	3.78892e-32	9.94781e-30	7.12189e-25	5.48416e-25	1.01279e-08	6.32583e-09	1.66102e-06	0.000210648	2.29562e-07	3.37829e-05	3.26618e-07	1.76591e-14	8.80047e-11	5.85318e-09	2.17897e-06
5984	ECG, load	30252	0.52378	8.35318e-142	3.6121e-142	9.4486e-149	9.02987e-124	1.2017e-67	5.35588e-135	2.5487e-134	1.54762e-147	3.25666e-166	6.03619e-155	7.66971e-199	2.82875e-133	9.20127e-144	1.51314e-136	3.83425e-124	2.69956e-53	3.5762e-122	1.51172e-132	5.2166e-138	2.76607e-140	1.46737e-142	7.04857e-148
5985	Bicycle speed	30252	0.44979	2.5714e-91	3.7696e-90	5.32274e-95	4.79775e-75	5.27033e-49	3.65019e-84	3.60228e-85	4.84933e-95	1.79882e-111	3.79661e-96	1.00447e-129	1.52698e-98	2.12882e-105	5.57064e-103	1.26755e-86	2.06835e-48	5.80104e-89	2.2803e-98	2.97897e-102	1.86118e-103	8.51948e-102	2.69098e-103
104290	Sweet pepper intake	5554	0.27393	0.0634961	0.094264	0.0917082	0.107522	0.124566	0.0504855	0.0580281	0.162633	0.0773075	0.0363611	0.0219646	0.0272885	0.024875	0.0266284	0.0142903	0.0602988	0.0182094	0.0283362	0.0692234	0.012366	0.0262794	0.0280896
5987	ECG, trend phase name	5758879	0	1	1	1	1	1	1	1	1	1	1	1	1	1	1	1	1	1	1	1	1	1	1
5988	ECG, stage name	5758879	0	1	1	1	1	1	1	1	1	1	1	1	1	1	1	1	1	1	1	1	1	1	1
5986	ECG, phase time	30337	0.473605	2.36297e-118	2.19067e-118	3.69119e-127	2.17215e-100	2.29754e-60	1.07636e-110	5.25918e-110	4.86108e-121	1.8099e-139	7.56445e-126	2.14461e-169	2.12219e-109	9.57239e-115	6.81695e-115	1.58337e-98	1.5926e-50	5.27357e-100	1.21002e-109	6.42669e-107	1.30635e-115	4.67284e-115	1.37265e-119
5991	ECG, phase name	294105	0	1	1	1	1	1	1	1	1	1	1	1	1	1	1	1	1	1	1	1	1	1	1
5992	ECG, phase duration	30337	0.454884	6.666e-89	8.37251e-88	7.04993e-95	2.04599e-73	5.50186e-51	3.97148e-82	1.44122e-81	1.70733e-89	2.80363e-107	5.96737e-94	8.71637e-128	5.20564e-101	2.4783e-107	4.73318e-107	2.76891e-88	4.03471e-47	1.72347e-91	3.47105e-101	3.17982e-100	3.79871e-107	2.54591e-103	7.60167e-108
5993	ECG, number of stages in a phase	30337	0.419847	4.6304e-151	3.66514e-153	1.91841e-159	5.37236e-133	1.99661e-59	3.93555e-145	4.06139e-145	9.23364e-161	3.78311e-176	7.59051e-164	2.71638e-212	3.07054e-86	6.81336e-91	1.54469e-86	2.51392e-83	3.39536e-37	2.59623e-79	9.43985e-85	4.64103e-89	7.723e-89	9.56917e-98	6.00712e-101
104300	Spinach intake	1516	-0.221208	0.103013	0.198265	0.177545	0.170645	0.0798693	0.0762407	0.183166	0.307856	0.0712588	0.0751923	0.0548414	0.343519	0.160349	0.461088	0.409897	0.408395	0.249794	0.435696	0.403051	0.443416	0.385077	0.366589
104310	Sprouts intake	728	0.329294	0.0410399	0.0993821	0.0679626	0.052928	0.104499	0.0380161	0.0329919	0.0559314	0.0867437	0.0249263	0.039239	0.537332	0.432612	0.495307	0.677182	0.381695	0.456978	0.545089	0.704029	0.395283	0.577653	0.501783
6014	Doctor restricts physical activity due to heart condition	98698	0	1	1	1	1	1	1	1	1	1	1	1	1	1	1	1	1	1	1	1	1	1	1
6015	Chest pain felt during physical activity	97938	0	1	1	1	1	1	1	1	1	1	1	1	1	1	1	1	1	1	1	1	1	1	1
6016	Chest pain felt outside physical activity	98655	0	1	1	1	1	1	1	1	1	1	1	1	1	1	1	1	1	1	1	1	1	1	1
6017	Able to walk or cycle unaided for 10 minutes	97665	0	1	1	1	1	1	1	1	1	1	1	1	1	1	1	1	1	1	1	1	1	1	1
104320	Sweetcorn intake	1672	-1.1554	0.231781	0.247743	0.284312	0.401552	0.235141	0.234181	0.276701	0.154011	0.376635	0.257468	0.236185	0.460687	0.377496	0.401429	0.342246	0.40309	0.378929	0.549261	0.517952	0.460037	0.396723	0.468012
6019	ECG/bike method for fitness test	30775	-1.22026	2.30948e-78	3.34885e-78	2.57378e-81	2.07537e-63	1.88497e-39	2.65613e-72	6.36008e-72	8.1877e-82	6.90132e-98	3.90171e-82	3.93972e-113	4.23157e-80	8.02104e-89	3.67973e-83	1.00353e-68	4.50482e-37	7.15927e-71	6.82704e-78	4.76458e-87	9.81249e-84	1.82032e-81	1.49306e-84
6020	Completion status of test	30342	-1.12313	1.4486e-13	1.85184e-10	2.88751e-15	6.85324e-12	6.7092e-14	1.06786e-12	7.32069e-13	1.18748e-13	8.5063e-12	2.94993e-14	1.75703e-16	2.11902e-10	1.61938e-06	8.42994e-11	2.00321e-09	2.9253e-16	7.93523e-11	2.40696e-11	8.01682e-09	2.95772e-12	1.97475e-10	4.50353e-10
6022	ECG during exercise duration	30834	0.345914	2.02117e-42	5.85128e-43	8.89336e-49	3.80655e-32	9.02774e-24	2.31578e-38	6.82323e-35	4.74527e-45	2.09635e-54	1.18766e-45	2.43029e-73	1.00025e-59	3.06838e-63	3.70214e-65	1.00234e-50	1.91269e-24	2.69302e-53	1.99707e-55	4.76641e-64	4.61149e-62	5.31177e-61	2.20299e-73
6023	Description of exercise protocol recommended	98045	0	1	1	1	1	1	1	1	1	1	1	1	1	1	1	1	1	1	1	1	1	1	1
6024	Program category	30834	-0.974169	2.11896e-07	3.80045e-08	3.31142e-07	3.19503e-06	3.1456e-06	2.08484e-06	9.84434e-08	2.20413e-07	3.25315e-08	3.79254e-08	9.10496e-09	6.23507e-08	1.74389e-09	2.3381e-07	1.21977e-09	0.000823169	2.84503e-09	9.04288e-08	7.99635e-07	2.468e-08	6.26734e-08	8.74666e-10
104330	Sweet potato intake	571	1.15289	0.268261	0.476565	0.184517	0.443211	0.215202	0.263264	0.258432	0.427212	0.276336	0.328734	0.217355	0.330201	0.085163	0.287555	0.560341	0.246648	0.402237	0.329313	0.349116	0.343087	0.291598	0.369835
6032	Maximum workload during fitness test	30337	0.543993	5.38852e-148	2.02886e-149	1.04807e-154	8.69145e-131	1.96367e-68	3.80319e-142	2.83192e-141	7.62539e-154	2.87651e-173	6.6669e-163	7.12904e-206	4.50655e-144	2.75596e-155	1.47762e-146	5.41029e-137	1.0403e-54	8.4709e-133	1.5799e-143	5.03458e-152	2.76958e-151	6.61782e-156	4.49086e-162
6033	Maximum heart rate during fitness test	30326	0.207947	1.87188e-38	6.68152e-39	2.58011e-33	9.46027e-26	5.55222e-14	1.19448e-34	1.59665e-34	2.85641e-50	1.28069e-49	1.67529e-39	1.17944e-40	2.37752e-22	1.23701e-28	2.90746e-18	4.32528e-15	1.54507e-10	4.10942e-16	1.53495e-19	6.00394e-33	2.03892e-24	8.94925e-23	4.06975e-21
6034	Target heart rate achieved	30337	-0.198477	0.0949137	0.143144	0.000940659	0.0117047	0.00576172	0.0547655	0.047509	0.943465	0.155837	0.0670952	0.00446794	0.00169958	0.0179778	3.016e-05	4.49743e-05	0.408055	3.96681e-05	5.11275e-05	0.292933	0.00110701	0.00172898	7.38984e-05
104340	Fresh tomato intake	10958	0.256209	0.0642837	0.0699923	0.068842	0.149879	0.219311	0.0348296	0.0788394	0.19524	0.0788719	0.0588315	0.0188054	0.0984583	0.0582656	0.127486	0.215644	0.0761117	0.0737932	0.0609518	0.303522	0.073282	0.100344	0.0781294
6038	Number of trend entries	30337	0.452748	8.42771e-130	8.05684e-130	2.78633e-137	4.49707e-112	2.715e-55	7.81051e-123	3.91028e-123	7.0003e-137	1.54404e-155	2.59635e-140	5.20136e-183	4.48251e-100	1.59115e-104	2.42198e-102	1.72533e-93	7.29947e-46	2.2281e-90	2.35443e-98	1.68055e-101	1.62885e-104	5.41836e-109	1.42888e-112
6039	Duration of fitness test	30337	0.454798	6.77147e-89	8.28619e-88	7.03516e-95	2.00445e-73	5.44943e-51	4.1006e-82	1.51192e-81	1.7896e-89	2.95746e-107	6.01296e-94	9.08608e-128	5.68063e-101	2.45558e-107	5.19696e-107	3.03038e-88	4.18383e-47	1.8491e-91	3.80453e-101	3.25149e-100	4.33936e-107	2.8199e-103	8.31708e-108
104350	Tinned tomato intake	2885	0.284906	0.00589002	0.00243067	0.00513733	0.0216217	0.0243657	0.00366512	0.0138482	0.0259643	0.0137438	0.00334185	0.00134631	0.0958846	0.0743809	0.1038	0.104242	0.100693	0.0840812	0.0832036	0.306827	0.118165	0.118753	0.031238
104360	Turnip/swede intake	699	-0.361458	0.0116567	0.00731442	0.00832145	0.00742826	0.0128044	0.0130026	0.00960204	0.0161831	0.0145495	0.0160089	0.0364679	0.287748	0.1187	0.294214	0.150806	0.28378	0.280047	0.280676	0.342966	0.160762	0.232491	0.203147
48	Waist circumference	215647	-0.33879	1.66209e-279	1e-255	2.19674e-14	1.68565e-307	6.24886e-303	1.89426e-293	3.7356e-290	1e-255	5.31392e-300	4.04864e-307	1e-255	1e-255	1e-255	1e-255	1e-255	1e-255	1e-255	1e-255	1e-255	1e-255	1e-255	1e-255
104370	Watercress intake	1430	0.313934	0.0623966	0.0990646	0.129713	0.0643843	0.0269807	0.0642599	0.0322029	0.133635	0.150109	0.105723	0.00809504	0.564938	0.578345	0.556542	0.261718	0.222806	0.469932	0.390354	0.64124	0.575607	0.528772	0.46355
6070	OCT measured (right)	30663	-0.122101	0.139202	0.225555	0.116389	0.250001	0.247721	0.135881	0.121166	0.256945	0.10888	0.119768	0.00522778	0.0847679	0.0295805	0.0428057	0.427604	0.112293	0.025034	0.07886	0.255339	0.0953231	0.0494501	0.0631304
6071	Duration at which OCT screen shown (right)	30663	-0.13205	2.92343e-16	3.53647e-13	2.05177e-14	2.10338e-17	8.79747e-20	3.78488e-16	5.12716e-18	1.15859e-09	6.4581e-17	3.14218e-15	1.74938e-14	5.75087e-10	9.49753e-09	1.56323e-08	6.66754e-12	1.06252e-13	1.14877e-09	9.01167e-14	3.7475e-05	9.86032e-11	3.61687e-10	1.15477e-07
6072	OCT measured (left)	30662	-0.0968447	0.155685	0.283499	0.100317	0.180367	0.216322	0.193698	0.128346	0.279807	0.139816	0.124273	0.00633821	0.16748	0.0857355	0.0853085	0.430283	0.221903	0.051955	0.146261	0.358898	0.173428	0.104592	0.0733638
6073	Duration at which OCT screen shown (left)	30662	-0.0991844	8.19294e-09	1.09462e-06	1.72732e-07	2.184e-10	1.34681e-09	2.68457e-08	3.13352e-10	2.80085e-06	3.88584e-09	1.78864e-08	8.67956e-07	3.24927e-06	0.000107336	7.79908e-05	6.63453e-08	8.17993e-09	1.05195e-05	3.59189e-09	0.00120179	3.6537e-07	4.88417e-06	0.000512368
6074	Glasses worn/required (right)	30955	-0.133008	0.847465	0.47898	0.817192	0.840157	0.884945	0.992032	0.819677	0.929355	0.35898	0.821117	0.0465899	0.188798	0.549285	0.22061	0.246262	0.120962	0.158412	0.21247	0.162396	0.176858	0.170556	0.236726
6075	Glasses worn/required (left)	30942	-0.143678	0.813892	0.465159	0.820418	0.880775	0.941406	0.868859	0.829569	0.914851	0.469032	0.822525	0.0430932	0.155539	0.4992	0.185632	0.24097	0.0941005	0.135158	0.176491	0.120732	0.148627	0.133737	0.189013
104380	Other vegetables intake	1615	-0.364209	0.0703377	0.0393249	0.0267943	0.163182	0.0933931	0.122328	0.056279	0.143993	0.0364266	0.0728134	0.0938753	0.143366	0.0702451	0.158361	0.117404	0.18376	0.174049	0.095293	0.0207007	0.148352	0.165539	0.176562
104400	Fruit consumers	458607	0	1	1	1	1	1	1	1	1	1	1	1	1	1	1	1	1	1	1	1	1	1	1
104410	Stewed fruit intake	1786	0.75559	0.0882107	0.13865	0.123166	0.160286	0.127384	0.0837832	0.0771932	0.0354411	0.110401	0.0719726	0.0233377	0.449256	0.400962	0.420778	0.592731	0.346674	0.404382	0.276982	0.371105	0.404773	0.47786	0.365151
104420	Prune intake	1346	-1.01618	0.265034	0.36181	0.266289	0.292344	0.157144	0.193663	0.450873	0.316863	0.378449	0.343996	0.296548	0.0151894	0.00481925	0.0124078	0.0184473	0.052454	0.0125884	0.0856123	0.00562663	0.0399109	0.0102201	0.02257
6119	Which eye(s) affected by glaucoma	653	-0.93136	0.600112	0.492367	0.503054	0.413045	0.464388	0.603477	0.624607	0.457733	0.481287	0.376103	0.591177	0.108377	0.214073	0.105184	0.120149	0.319494	0.120208	0.121267	0.0739762	0.0795873	0.205676	0.0743446
104430	Dried fruit intake	4048	0.575674	0.423728	0.149105	0.202768	0.457971	0.234977	0.347339	0.322527	0.612812	0.352751	0.558064	0.399576	0.276016	0.205869	0.344469	0.238082	0.385948	0.322972	0.258423	0.267904	0.200942	0.288439	0.203992
104440	Mixed fruit intake	1415	-0.596947	0.00613166	0.0992127	0.00406166	0.00214459	0.00438084	0.0073533	0.00275081	0.0201486	0.00349943	0.00596166	0.0587509	0.277104	0.206487	0.239322	0.144404	0.106078	0.336824	0.263817	0.188284	0.314709	0.233747	0.150401
6138	Qualifications	215945	1.58561	4.38756e-37	1.63121e-37	4.663e-35	1.94566e-41	2.59793e-35	8.38916e-38	1.01637e-36	1.15519e-21	5.4959e-38	2.95949e-40	2.67835e-50	5.37467e-69	1.73586e-57	8.99159e-70	1.94919e-77	7.00374e-75	2.67795e-71	7.48547e-68	1.77384e-42	1.14328e-73	8.4763e-72	3.71942e-75
6139	Gas or solid-fuel cooking/heating	215945	1.34091	1.1923e-05	2.06326e-05	1.41632e-05	0.00035336	4.89398e-06	3.89741e-06	3.77123e-06	0.00188184	7.05207e-06	3.29883e-06	9.13459e-07	0.0174487	0.0675249	0.0203624	0.00343163	0.0324891	0.0133132	0.0134853	0.00802272	0.0118563	0.0202467	0.00476558
6140	Heating type(s) in home	69374	0.881622	0.0150248	0.0226214	0.0457021	0.046586	0.00206442	0.0103137	0.009383	0.00452078	0.0289636	0.0392795	0.0061889	0.0941091	0.14587	0.106141	0.136694	0.0112951	0.0963677	0.131547	0.0377013	0.0794764	0.0629065	0.0218038
6141	How are people in household related to participant	173464	0.459067	4.69918e-10	4.12708e-08	1.33614e-10	2.66251e-10	1.19918e-09	2.60651e-09	1.29018e-10	8.07273e-07	3.61952e-09	7.70863e-10	3.30085e-13	0.00228547	0.00145518	0.000837735	0.0109074	0.00336927	0.00137411	0.00622808	0.00354686	0.00260483	0.00117171	0.000976878
6142	Current employment status	215945	1.12106	1.67435e-09	1.01439e-08	8.604e-10	3.57173e-10	1.29847e-10	2.36017e-09	6.16413e-09	7.3868e-08	5.73431e-09	1.15229e-09	3.15475e-16	1.91518e-12	9.21139e-12	4.02021e-12	2.88718e-12	1.18944e-13	1.72941e-12	6.94306e-10	2.98631e-11	1.9064e-12	4.68214e-13	3.49458e-15
6143	Transport type for commuting to job workplace	109916	0.559152	0.592608	0.523738	0.629229	0.358543	0.124265	0.515388	0.621982	0.407908	0.177305	0.577923	0.455373	0.12963	0.106399	0.124346	0.0913058	0.0796927	0.203386	0.168551	0.321831	0.119871	0.111551	0.200181
6144	Never eat eggs, dairy, wheat, sugar	215945	1.31039	2.52738e-13	8.65516e-12	8.84747e-13	2.88632e-14	6.06675e-12	1.13093e-13	2.88965e-13	7.37586e-10	9.50048e-13	3.79979e-15	2.26199e-22	5.49793e-16	1.17899e-15	1.0811e-15	2.65206e-16	5.18927e-14	8.29994e-15	3.12069e-15	1.89002e-12	2.56551e-17	4.78858e-15	1.16019e-18
6145	Illness, injury, bereavement, stress in last 2 years	215945	2.1256	9.49158e-25	8.96148e-26	1.45975e-24	1.30726e-26	4.72633e-27	4.68171e-27	4.93817e-26	6.24889e-28	7.51551e-25	4.80299e-26	7.56267e-32	1.34778e-63	3.0277e-75	1.3102e-61	3.6074e-72	4.5493e-73	2.75736e-63	1.13119e-66	3.8149e-72	2.5198e-65	7.07672e-64	5.92758e-36
104450	Apple intake	10347	1.23948	0.203919	0.154048	0.13076	0.100892	0.201513	0.259107	0.16638	0.206044	0.365395	0.173079	0.0905499	0.000129831	3.74111e-05	0.000103902	0.000300719	0.00106577	4.51345e-05	6.02983e-05	0.000177951	0.00112605	0.000101036	4.30331e-05
6146	Attendance/disability/mobility allowance	215945	1.00621	2.88248e-14	8.02773e-14	1.4604e-15	3.17612e-12	1.22622e-15	6.61494e-13	2.68639e-14	9.40941e-18	1.99113e-14	4.81471e-14	3.42359e-16	6.32994e-11	1.27385e-09	2.25398e-10	4.48058e-12	7.91789e-13	7.82463e-11	2.86083e-11	2.15609e-10	2.31881e-11	7.52179e-12	5.97261e-13
6148	Eye problems/disorders	69692	-4.01718	3.77121e-99	1.14591e-108	1.90148e-92	5.54839e-76	1.21235e-91	9.14174e-100	5.15353e-72	7.3427e-121	2.46667e-98	1.48075e-98	2.723e-96	6.21561e-124	7.49489e-136	5.13613e-121	6.2693e-89	2.32347e-118	4.74104e-128	4.85253e-53	5.2856e-136	7.66148e-154	2.02072e-123	2.43699e-119
6149	Mouth/teeth dental problems	215945	1.42803	3.73048e-27	6.10506e-32	5.85008e-29	6.12377e-29	7.40027e-30	1.33257e-26	3.53649e-27	1.37409e-30	1.18411e-30	2.21782e-28	4.82742e-12	4.20016e-17	9.29532e-20	1.58543e-16	3.1054e-19	1.27867e-19	3.48281e-16	2.09465e-17	2.55579e-19	4.59364e-17	8.18122e-17	2.26407e-09
6147	Reason for glasses/contact lenses	42505	0.817613	2.88071e-09	5.36897e-08	5.48844e-09	7.84283e-10	3.22876e-08	1.37758e-08	8.68909e-09	4.65088e-06	2.56003e-09	8.58679e-11	8.67586e-15	1.00175e-07	7.96148e-06	3.31702e-07	6.4559e-08	1.02688e-08	4.07138e-07	1.95326e-07	2.74656e-07	5.05036e-09	2.527e-09	7.15205e-10
6151	Fractured bone site(s)	22451	-1.76342	0.057184	0.074129	0.0886718	0.0200856	0.133081	0.0492485	0.0825058	0.181761	0.0614836	0.0553902	0.0210155	0.302563	0.197908	0.323374	0.101373	0.429087	0.405655	0.330576	0.486119	0.45735	0.283332	0.38558
6152	Blood clot, DVT, bronchitis, emphysema, asthma, rhinitis, eczema, allergy diagnosed by doctor	215945	1.20775	5.42115e-05	7.35732e-06	1.02148e-05	2.68987e-05	1.17539e-05	5.81186e-05	3.04473e-05	1.0792e-05	1.14943e-05	3.04796e-05	8.52457e-14	3.35464e-07	2.09069e-08	3.76806e-07	5.43086e-08	6.26236e-08	5.39628e-08	2.64799e-07	3.35363e-08	4.33717e-07	2.96617e-07	4.91958e-07
6153	Medication for cholesterol, blood pressure, diabetes, or take exogenous hormones	215941	-3.64077	1	1	1	1	1	1	1	1	1	1	1	1.26978e-39	2.04007e-37	1.29285e-37	6.0043e-37	1.20115e-41	3.0715e-38	6.3232e-21	8.90464e-53	2.07811e-45	3.2668e-38	1.43823e-43
6154	Medication for pain relief, constipation, heartburn	215945	0.477026	2.55956e-15	4.75029e-16	1.39082e-15	9.38367e-19	1.82911e-15	2.58805e-15	3.64734e-17	6.11539e-12	5.35081e-17	3.0502e-18	5.78872e-23	9.99153e-07	1.58319e-09	4.14692e-07	2.05895e-09	3.90044e-08	3.46674e-07	3.78555e-06	1.36104e-08	3.24728e-09	6.84209e-07	3.78016e-07
6150	Vascular/heart problems diagnosed by doctor	215945	-1.52698	5.95835e-16	1.4859e-18	4.38708e-18	7.07463e-17	2.68819e-06	6.32297e-16	8.33819e-16	5.03155e-20	4.1436e-18	4.78561e-17	2.92915e-21	3.25599e-13	5.73254e-16	6.82897e-14	9.726e-15	2.86027e-07	4.7427e-13	6.10977e-14	8.24268e-16	4.33009e-14	7.18828e-14	4.62789e-17
104460	Banana intake	13793	1.39801	0.0202491	0.0511597	0.0281354	0.0223546	0.0211153	0.0212006	0.0161698	0.0565547	0.0220604	0.0460445	0.0430724	0.0014526	0.0016695	0.00245748	0.00323717	0.0714685	0.00053074	0.00210739	0.00225532	0.00839555	0.000728321	0.0134504
6156	Manic/hyper symptoms	14105	-0.603012	0.0107268	0.0818119	0.0147209	0.0116115	0.0200907	0.0080435	0.014546	0.00394522	0.00167168	0.0158889	0.00430912	1.97067e-06	6.46585e-06	1.2657e-06	2.69482e-05	1.57486e-05	3.31125e-06	5.53096e-07	0.00111565	8.85754e-07	7.22984e-07	2.12991e-09
6155	Vitamin and mineral supplements	215945	0.850278	6.534e-14	1.58036e-12	3.22627e-12	3.61695e-15	1.10256e-13	2.02036e-14	4.3662e-14	2.09909e-09	4.74809e-14	3.65801e-14	1.47418e-24	8.29707e-07	1.58521e-10	7.77639e-07	4.12215e-08	1.41265e-05	2.04413e-07	1.07601e-07	9.62742e-05	1.97594e-07	8.44764e-08	2.28194e-07
6159	Pain type(s) experienced in last month	215945	1.99388	7.89823e-10	5.72447e-11	5.09234e-10	5.4205e-11	1.16689e-10	1.28732e-10	1.45866e-10	6.41369e-11	6.83155e-10	8.05003e-10	8.66457e-14	2.89051e-25	4.40924e-29	1.41442e-24	2.75477e-28	5.22843e-29	9.74969e-25	3.85829e-26	2.05706e-28	1.96769e-25	3.03522e-25	2.431e-10
6160	Leisure/social activities	215945	1.22269	0.0134991	0.0600792	0.0496794	0.012759	0.00166333	0.00622191	0.010306	0.00884177	0.0127088	0.010718	1.05574e-07	3.49206e-14	9.41424e-11	1.60293e-13	1.07439e-15	2.29709e-16	5.08912e-15	8.12546e-17	3.94376e-10	1.79382e-15	5.79346e-15	7.10592e-15
6158	Why reduced smoking	6174	0.872636	0.000258572	0.000187337	0.000106153	9.02209e-05	0.00111579	0.000323242	0.00103895	0.000167177	0.000130302	0.000115581	1.0759e-05	0.000909371	0.00503973	0.00140309	0.0011987	7.09547e-05	0.000603423	0.00140121	0.00460297	0.000990226	0.000545514	0.00115321
6162	Types of transport used (excluding work)	215224	-1.52332	0.0966722	0.0916931	0.0957351	0.170301	0.127505	0.104299	0.0776421	0.109411	0.0430142	0.091555	0.191096	0.0166857	0.0861905	0.0101198	0.00795265	0.0526061	0.00461713	0.0165336	0.20488	0.0230965	0.0234632	0.0186571
6157	Why stopped smoking	44608	0.732446	0.000748248	0.000774911	0.00235749	6.67608e-05	0.00145445	0.000711314	0.000279311	0.00021081	0.000271817	0.000899602	0.000760981	0.00188463	0.0181296	0.00190788	0.00013009	0.00162972	0.000984702	0.00265757	0.00429729	0.000931145	0.00222303	0.00117244
6164	Types of physical activity in last 4 weeks	215306	2.21609	0.00151987	0.00881683	0.00263881	0.000174646	0.00384258	0.000569076	0.00149493	0.000198655	0.000931801	0.000120424	4.33735e-07	1.14802e-12	3.59373e-13	7.96611e-13	1.32601e-10	8.01611e-15	2.37704e-12	2.78883e-16	5.96024e-12	1.60513e-12	4.86816e-13	6.542e-11
104470	Berry intake	6132	0.31173	0.0445264	0.0360507	0.0429911	0.0758307	0.0280119	0.0356556	0.0647317	0.00781836	0.0630197	0.0390963	0.138139	0.285867	0.26872	0.280421	0.208138	0.258819	0.198102	0.198463	0.0899619	0.297515	0.217828	0.274745
104480	Cherry intake	962	1.01505	0.160832	0.119235	0.350032	0.152308	0.103814	0.228081	0.160478	0.156604	0.170112	0.353819	0.26251	0.0155451	0.0325395	0.0180544	0.00472448	0.026045	0.005925	0.0102413	0.0558652	0.0248974	0.0122519	0.124331
6177	Medication for cholesterol, blood pressure or diabetes	0	0	2.2102e-22	3.0186e-21	2.78082e-22	2.40475e-23	4.60853e-25	2.25058e-22	5.52066e-24	2.11989e-25	3.34951e-22	9.44556e-26	7.00103e-36	1	1	1	1	1	1	1	1	1	1	1
6179	Mineral and other dietary supplements	215945	0.999598	9.88089e-09	8.01329e-07	1.10496e-08	6.74261e-09	7.70984e-09	4.86937e-09	4.38836e-09	4.64975e-08	1.19977e-08	7.67311e-09	1.11994e-17	4.82319e-06	1.113e-07	8.11542e-06	4.8165e-08	5.84963e-07	5.74842e-06	3.04693e-06	0.00356468	2.04568e-05	1.57216e-06	1.67107e-07
49	Hip circumference	215629	-0.0773139	0.134618	0.193914	2.81933e-23	0.160859	0.0199553	0.0720196	0.0528988	0.0243318	0.325017	0.402228	0.30847	4.30147e-21	1.9371e-25	7.95688e-85	7.03262e-28	3.89889e-24	1.57816e-25	3.10433e-22	1.73654e-26	1.74324e-23	1.30765e-24	7.56106e-23
6183	Number of cigarettes previously smoked daily (current cigar/pipe smokers)	63	0.588195	0.103579	0.58071	0.179334	0.0311641	0.514625	0.133748	0.0742579	0.00665522	0.0266336	0.120586	0.0355753	0.326376	0.458477	0.285162	0.266248	0.31305	0.31936	0.403607	0.805661	0.379434	0.340121	0.181271
104490	Grapefruit intake	1010	-4.19435	0.44582	0.80564	0.395863	0.194354	0.489788	0.391308	0.505169	0.235095	0.304534	0.570864	0.838915	0.11652	0.126054	0.0947333	0.184038	0.0380658	0.0858069	0.0929292	0.0645175	0.170608	0.133754	0.296346
6194	Age stopped smoking cigarettes (current cigar/pipe or previous cigarette smoker)	55	0.189032	0.0389676	0.0336549	0.0926406	0.0134336	0.0187721	0.0537904	0.0401267	0.0244269	0.11595	0.0196846	0.128475	0.765423	0.719646	0.674884	0.629534	0.667266	0.796388	0.586586	0.844903	0.614229	0.867663	0.915457
104500	Grape intake	6293	0.166055	0.000326553	0.00160389	0.000585116	0.000485156	0.000412963	9.55863e-05	0.000254383	0.00276219	0.000366542	8.2739e-05	0.0031381	0.127458	0.157687	0.13399	0.0780486	0.0504771	0.0536559	0.0905829	0.268996	0.0162927	0.138162	0.097914
6205	Which eye(s) affected by strabismus (squint)	988	0.147568	0.187388	0.227459	0.253337	0.15796	0.182871	0.295388	0.250194	0.20197	0.107973	0.310552	0.297406	0.587726	0.719447	0.485627	0.462633	0.922437	0.453253	0.512238	0.307014	0.615473	0.669795	0.579399
104510	Mango intake	763	-2.34614	0.726362	0.545923	0.551105	0.663568	0.790533	0.676456	0.659301	0.670468	0.531386	0.726566	0.485461	0.208825	0.283728	0.174685	0.197193	0.0808485	0.2384	0.170258	0.283682	0.227889	0.227445	0.142914
104520	Melon intake	1533	-1.75392	0.0862985	0.173087	0.056292	0.102424	0.071324	0.0678474	0.129006	0.0625444	0.0636907	0.188293	0.0579261	0.0932999	0.310937	0.130613	0.0564673	0.179693	0.116523	0.115689	0.048595	0.0834521	0.0644047	0.0273413
6218	Impedance of whole body, manual entry	12	0.706582	0.283287	0.176328	0.449616	0.147085	0.362385	0.373897	0.163173	0.518352	0.275929	0.208319	0.597423	0.587327	0.691909	0.703103	0.498383	0.688462	0.46037	0.393302	0.0898879	0.646678	0.589166	0.980772
6219	Impedance of leg, manual entry (right)	12	0.446168	0.239135	0.225232	0.446102	0.0692236	0.299371	0.279786	0.164839	0.295835	0.223593	0.163448	0.530601	0.73304	0.852433	0.882348	0.656327	0.78562	0.597619	0.553986	0.11436	0.81399	0.739918	0.874309
6220	Impedance of leg, manual entry (left)	12	0.600221	0.126554	0.138808	0.178446	0.0668678	0.13218	0.17738	0.105833	0.181345	0.0909691	0.0767052	0.291091	0.645508	0.74382	0.774218	0.5496	0.710825	0.521531	0.487295	0.0929733	0.714558	0.639256	0.953215
6221	Impedance of arm, manual entry (right)	12	0.672257	0.207045	0.0955509	0.242359	0.174454	0.383126	0.325582	0.106178	0.52827	0.245031	0.156616	0.613692	0.60588	0.722641	0.727952	0.496644	0.739708	0.461227	0.395289	0.0989775	0.681898	0.616316	0.994426
6222	Impedance of arm, manual entry (left)	12	0.744381	0.302667	0.165564	0.280047	0.32292	0.458342	0.435319	0.190259	0.674727	0.288791	0.238862	0.664812	0.567157	0.664186	0.684043	0.458828	0.687002	0.42428	0.381734	0.099263	0.59989	0.553287	0.949561
104530	Orange intake	3079	1.41126	0.467934	0.267872	0.312276	0.509578	0.378339	0.428368	0.523139	0.292933	0.50835	0.273327	0.458593	0.0392748	0.068732	0.0597243	0.0689572	0.096469	0.0217308	0.0303189	0.118382	0.0199717	0.0194561	0.0672973
104540	Satsuma intake	3938	-0.410988	0.254474	0.539628	0.372208	0.217199	0.216062	0.309336	0.182814	0.140464	0.124834	0.214178	0.118772	0.00182905	0.012422	0.000913988	0.00720125	0.0022232	0.00207236	0.00461489	0.000622672	0.000823736	0.00122114	0.0161807
104550	Peach/nectarine intake	2471	-0.860511	0.0100244	0.013093	0.00993331	0.0154352	0.00775501	0.0195984	0.00929381	0.0199141	0.00558449	0.0285853	0.031451	0.136686	0.203291	0.138747	0.131167	0.113221	0.15852	0.236889	0.0626156	0.128727	0.0963233	0.0176478
104560	Pear intake	3379	-0.876421	0.120101	0.0569127	0.17995	0.0540253	0.161978	0.113951	0.0468929	0.0616443	0.106833	0.107662	0.305927	0.316086	0.114846	0.286786	0.046472	0.415782	0.368777	0.431232	0.152554	0.237472	0.266391	0.243185
104570	Pineapple intake	1441	-0.610936	0.0168926	0.00404117	0.0223283	0.0287888	0.0182368	0.007423	0.0101769	0.064921	0.0282946	0.0223754	0.0857418	0.0848277	0.0492733	0.0742652	0.102085	0.186564	0.155369	0.103578	0.0798705	0.0761216	0.152879	0.0604594
104580	Plum intake	1822	-0.27495	0.046949	0.11463	0.0503301	0.0559355	0.0788628	0.0566796	0.0230178	0.0444288	0.140141	0.0427566	0.0287248	0.50681	0.40611	0.427562	0.564238	0.303838	0.616185	0.529166	0.287844	0.615269	0.49918	0.335509
104590	Other fruit intake	1551	0.26638	0.100734	0.116078	0.161931	0.060632	0.116156	0.074543	0.119129	0.219432	0.146323	0.145608	0.0794049	0.312434	0.231698	0.313814	0.4472	0.194211	0.276561	0.482283	0.477972	0.17792	0.162358	0.305916
50	Standing height	215603	0.57413	1e-255	1e-255	1e-255	1e-255	1e-255	1e-255	1e-255	1e-255	1e-255	1e-255	1e-255	1e-255	1e-255	1e-255	1e-255	1e-255	1e-255	1e-255	1e-255	1e-255	1e-255	1e-255
6312	Value entered	11665	-1.35459	0.175308	0.186389	0.0869647	0.146358	0.177124	0.271445	0.238301	0.353331	0.159146	0.210822	0.163672	0.00276749	0.00824134	0.00278303	0.000779878	0.0290598	0.00697313	0.00087624	0.0060022	0.00253896	0.00123284	0.00641938
6332	Item selected for each puzzle	11768	5.45249	0.403214	0.29962	0.395257	0.41104	0.244829	0.347749	0.446441	0.321557	0.273185	0.319785	0.255257	0.270862	0.18471	0.270122	0.172607	0.46571	0.25032	0.2757	0.413974	0.28459	0.25652	0.244343
6333	Duration spent answering each puzzle	11768	0.0493439	0.110651	0.565508	0.12836	0.110543	0.156613	0.152348	0.144655	0.00226672	0.189202	0.0691583	0.322464	0.126316	0.217934	0.219909	0.0802391	0.309854	0.0678715	0.200473	0.00934304	0.159085	0.105737	0.0936245
6334	Screen layout	68634	0	1	1	1	1	1	1	1	1	1	1	1	1	1	1	1	1	1	1	1	1	1	1
6348	Duration to complete numeric path (trail #1)	11895	-0.0945997	0.000303008	0.000207028	0.000666216	7.47915e-05	0.000193943	0.000435784	0.000180499	0.0429515	0.00059162	0.000147493	5.99107e-07	0.00329371	0.104285	0.00182043	0.000315052	4.16408e-05	0.00893844	0.0111629	0.19105	0.00237341	0.00279953	0.00014821
6349	Total errors traversing numeric path (trail #1)	11895	0.0041891	0.663536	0.80692	0.527473	0.773678	0.678242	0.444413	0.582821	0.788121	0.323155	0.762574	0.754615	0.896473	0.870909	0.987705	0.97376	0.902028	0.812253	0.467522	0.79238	0.70444	0.908175	0.909003
6350	Duration to complete alphanumeric path (trail #2)	11895	-0.138191	1.12212e-05	1.68154e-05	5.66443e-06	8.70296e-06	2.36458e-06	1.25957e-05	1.23572e-05	0.00447786	1.38897e-05	1.33889e-05	1.34428e-06	1.75455e-05	0.01322	4.16382e-06	1.09897e-07	4.7578e-07	3.64016e-05	4.74962e-05	0.0270227	2.96054e-05	8.18482e-06	5.90222e-08
6351	Total errors traversing alphanumeric path (trail #2)	11895	-0.0938989	0.00594746	0.0294459	0.00403248	0.00714352	0.0043913	0.00942515	0.0185116	0.0180608	0.00750248	0.00453349	0.00137906	0.0035327	0.103708	0.00230307	0.000706577	0.00119811	0.0102111	0.0078711	0.0225777	0.00608556	0.00185279	0.00010694
104660	Added salt to food	98520	0	1	1	1	1	1	1	1	1	1	1	1	1	1	1	1	1	1	1	1	1	1	1
6362	First code array presented	29555	0	1	1	1	1	1	1	1	1	1	1	1	1	1	1	1	1	1	1	1	1	1	1
104670	Vitamin supplement user	458607	0	1	1	1	1	1	1	1	1	1	1	1	1	1	1	1	1	1	1	1	1	1	1
6373	Number of puzzles correctly solved	11769	0.269195	2.45402e-10	4.43451e-09	4.50048e-12	2.10941e-13	4.90579e-10	1.27565e-10	8.36812e-10	6.82021e-05	1.56602e-10	1.16715e-09	5.65324e-13	6.65686e-17	7.71823e-10	2.18199e-18	2.15312e-21	1.41335e-21	9.97247e-18	8.63315e-17	1.69943e-08	3.17858e-15	2.28104e-17	3.55165e-21
6374	Number of puzzles viewed	11769	0.0413603	0.712486	0.308672	0.408497	0.833898	0.512985	0.692612	0.543421	0.265908	0.582144	0.919508	0.547673	0.200007	0.543343	0.125924	0.233824	0.0572952	0.259278	0.13319	0.936768	0.243991	0.173357	0.268961
6382	Number of puzzles correct	11895	0.224123	1.54275e-06	2.5367e-08	8.11874e-08	6.34344e-08	3.49694e-06	3.67966e-06	3.61847e-06	0.000941684	1.27207e-07	9.04454e-05	2.37166e-06	3.20072e-12	1.1071e-09	3.8006e-13	2.31572e-16	4.04555e-14	1.3949e-11	6.23467e-13	0.00014579	1.08952e-10	3.87316e-12	7.06499e-14
6383	Number of puzzles attempted	11895	0.100879	0.00619087	0.000139801	0.00591027	0.00271315	0.0103616	0.00888412	0.00607966	0.377335	0.00126328	0.0253726	0.00306837	0.00172397	0.0011367	0.00157912	0.000108371	8.42671e-05	0.00226039	0.000321979	0.533125	0.0071144	0.00456668	0.00466102
1269	Exposure to tobacco smoke at home	196711	-0.0266762	2.18595e-05	0.000920425	5.07157e-05	7.18998e-08	6.34128e-06	2.70132e-05	1.16058e-05	1.83587e-05	2.33456e-05	3.11636e-06	1.90849e-13	0.0016474	0.133683	0.00133927	3.93264e-05	0.000241138	0.00111467	0.000787883	0.00181228	0.000471732	0.000994334	4.6846e-06
51	Seated height	215596	0.57672	1e-255	1e-255	1e-255	1e-255	1e-255	1e-255	1e-255	1e-255	1e-255	1e-255	1e-255	1e-255	1e-255	1e-255	1e-255	1e-255	1e-255	1e-255	1e-255	1e-255	1e-255	1e-255
1279	Exposure to tobacco smoke outside home	182983	-0.0752521	9.98019e-10	2.19393e-06	1.29015e-08	1.47648e-10	2.90705e-12	3.68087e-09	4.62248e-10	4.05571e-13	8.7056e-11	3.7259e-12	4.13183e-23	8.3869e-18	8.18545e-10	6.67379e-18	1.7144e-22	1.28021e-24	2.82126e-18	1.91268e-16	1.47695e-14	1.61547e-17	3.45588e-20	3.55416e-30
1309	Fresh fruit intake	215378	0.0746316	3.78598e-10	2.51013e-24	2.6086e-07	0.000385788	3.03537e-08	7.42751e-12	6.05322e-08	0.001314	2.18562e-11	2.89516e-11	0.00432511	9.85869e-20	0.00158068	9.44178e-22	1.86704e-38	3.83144e-25	5.75137e-27	1.01053e-24	1.45711e-37	4.81313e-07	2.08899e-22	4.06352e-25
104900	Time spent doing vigorous physical activity	30087	-0.208406	0.142325	0.0438359	0.0797836	0.0993409	0.14603	0.0954156	0.0630467	0.00641539	0.121176	0.12251	0.0711149	0.0585091	0.0171422	0.0996827	0.156972	0.0532322	0.0702466	0.0796808	0.0438949	0.0444228	0.0771928	2.81797e-05
104910	Time spent doing moderate physical activity	30087	0.160534	0.00865336	0.0038959	0.0258986	0.00672385	0.00613608	0.010535	0.0128471	0.00118887	0.0052522	0.00295042	0.00121292	0.0139692	0.0398417	0.0146608	0.00956057	0.00890271	0.0226941	0.00658563	0.0283015	0.0144055	0.012123	0.0031386
104920	Time spent doing light physical activity	30087	-0.439641	0.00257318	0.00155279	0.0041244	0.00216957	0.000766891	0.00505161	0.000916229	0.0011076	0.00216728	0.00521146	0.00173849	0.0188917	0.00243391	0.028889	0.0182721	0.0285904	0.0457264	0.0289853	0.00136286	0.0270334	0.0283725	0.0528775
105010	When diet questionnaire completed	0	0	1	1	1	1	1	1	1	1	1	1	1	1	1	1	1	1	1	1	1	1	1	1
105030	When diet questionnaire started	0	0	1	1	1	1	1	1	1	1	1	1	1	1	1	1	1	1	1	1	1	1	1	1
6770	Errors before selecting correct item in numeric path (trail #1)	3971	-0.00849459	0.519684	0.579815	0.278213	0.779539	0.511591	0.402592	0.579446	0.73688	0.200927	0.513187	0.845604	0.878015	0.631834	0.624491	0.931299	0.908158	0.889431	0.705659	0.922913	0.918662	0.880942	0.790232
6771	Errors before selecting correct item in alphanumeric path (trail #2)	5204	-0.0501784	0.386043	0.673632	0.456041	0.48117	0.53926	0.367783	0.514981	0.509633	0.449702	0.256107	0.15159	0.313371	0.815633	0.298069	0.49296	0.139487	0.459295	0.32406	0.550795	0.351878	0.360631	0.087909
6772	Interval between previous point and current one in numeric path (trail #1)	11788	-0.0995563	0.267107	0.183367	0.338017	0.179367	0.25669	0.227101	0.275686	0.507366	0.430683	0.315865	0.310972	0.00202526	0.00105966	0.00130252	0.00201908	0.000240434	0.00258292	0.00486789	0.08197	0.00132596	0.00531343	0.00291187
6773	Interval between previous point and current one in alphanumeric path (trail #2)	11747	-0.042721	0.0594765	0.116424	0.0561562	0.0303052	0.0829348	0.0700763	0.0914753	0.111644	0.101226	0.0331745	0.00621706	0.186193	0.368638	0.153157	0.264991	0.0100556	0.217856	0.121045	0.654877	0.242174	0.303709	0.0328241
40000	Date of death	20502	0	1	1	1	1	1	1	1	1	1	1	1	1	1	1	1	1	1	1	1	1	1	1
40001	Underlying (primary) cause of death: ICD10	20492	0	1	1	1	1	1	1	1	1	1	1	1	1	1	1	1	1	1	1	1	1	1	1
40002	Contributory (secondary) causes of death: ICD10	27182	0	1	1	1	1	1	1	1	1	1	1	1	1	1	1	1	1	1	1	1	1	1	1
40005	Date of cancer diagnosis	118715	0	1	1	1	1	1	1	1	1	1	1	1	1	1	1	1	1	1	1	1	1	1	1
40006	Type of cancer: ICD10	103466	0	1	1	1	1	1	1	1	1	1	1	1	1	1	1	1	1	1	1	1	1	1	1
40007	Age at death	6459	0.371276	6.87441e-11	5.80202e-11	4.61211e-12	2.30795e-12	1.40146e-11	3.57011e-10	9.26139e-15	1.04379e-10	4.04949e-11	1.08929e-11	3.45827e-13	2.27682e-10	3.57187e-07	4.45369e-11	1.12984e-13	3.55573e-11	2.28892e-09	3.86602e-07	8.18759e-09	1.35037e-09	9.22066e-10	4.37407e-11
40008	Age at cancer diagnosis	41532	0.263939	2.63354e-88	2.57258e-85	8.81646e-95	2.63773e-92	2.84708e-102	3.73172e-92	8.0369e-88	1.55471e-92	1.79688e-96	2.93075e-91	6.15528e-06	3.36347e-42	2.59192e-40	1.1991e-44	5.95917e-52	6.60576e-49	3.70825e-48	5.12205e-40	3.16463e-46	4.32975e-44	5.51691e-46	7.76104e-13
40009	Reported occurrences of cancer	41517	-0.220129	1.21239e-36	3.23122e-37	3.70339e-36	2.54727e-32	2.74159e-38	2.6032e-37	6.26124e-36	3.57798e-39	5.2394e-40	1.49221e-35	2.90435e-08	7.65197e-30	1.29941e-29	1.18527e-29	1.49013e-29	4.68416e-31	2.48903e-37	1.59248e-30	2.11872e-32	1.18793e-33	5.98e-32	4.07569e-09
40010	Description of cause of death	17147	0	1	1	1	1	1	1	1	1	1	1	1	1	1	1	1	1	1	1	1	1	1	1
40011	Histology of cancer tumour	113834	0	1	1	1	1	1	1	1	1	1	1	1	1	1	1	1	1	1	1	1	1	1	1
40012	Behaviour of cancer tumour	38841	-0.320192	0.000287363	0.00107467	0.000526674	0.00115459	0.000882151	0.000325037	0.000458756	2.45959e-05	0.00011653	0.000679162	0.00161451	0.0647548	0.103429	0.0399729	0.126976	0.0970453	0.0414416	0.0332798	0.00559244	0.0454527	0.0430277	0.17407
40013	Type of cancer: ICD9	4234	-0.0350419	0.514819	0.335978	0.431931	0.358665	0.689214	0.559302	0.566804	0.555364	0.409007	0.753461	0.0851893	0.558865	0.392134	0.902865	0.904934	0.25968	0.665267	0.894661	0.8235	0.606043	0.8316	0.0224868
40018	Death report format	6449	3.71541	1.88434e-06	1.00913e-05	0.00494703	0.000152249	9.57527e-06	6.59919e-06	7.63278e-06	3.10694e-06	2.06077e-05	6.12036e-07	1.88412e-10	0.265078	0.242429	0.32927	0.255833	0.722298	0.330872	0.510037	0.204121	0.249049	0.274318	0.0511026
40019	Cancer report format	41543	0.382116	3.02121e-27	4.91095e-20	7.12374e-16	9.62206e-23	2.17339e-29	2.8437e-29	1.39374e-21	8.99503e-27	1.88767e-28	4.44166e-29	1.31128e-17	2.15139e-13	1.92518e-10	5.04849e-13	2.33809e-14	8.30548e-15	1.43029e-16	1.78164e-12	6.04132e-15	1.21443e-14	5.406e-16	9.22779e-14
40425	Volume of DNA held by UKB	75588	0.176431	1.27844e-18	0.00243197	1.89138e-17	4.90752e-22	9.56611e-20	9.62247e-19	1.00302e-18	9.42399e-23	3.02955e-19	1.2043e-20	6.49227e-23	7.72309e-36	1.33767e-11	8.41094e-34	1.33924e-36	2.06145e-36	3.97344e-40	3.70648e-32	2.87214e-36	6.08625e-38	3.19545e-38	2.84673e-38
41200	Operative procedures - main OPCS4	1655831	0	1	1	1	1	1	1	1	1	1	1	1	1	1	1	1	1	1	1	1	1	1	1
41201	External causes - ICD10	102832	0	1	1	1	1	1	1	1	1	1	1	1	1	1	1	1	1	1	1	1	1	1	1
41202	Diagnoses - main ICD10	1726267	0	1	1	1	1	1	1	1	1	1	1	1	1	1	1	1	1	1	1	1	1	1	1
41203	Diagnoses - main ICD9	42828	0	1	1	1	1	1	1	1	1	1	1	1	1	1	1	1	1	1	1	1	1	1	1
41204	Diagnoses - secondary ICD10	2511218	0	1	1	1	1	1	1	1	1	1	1	1	1	1	1	1	1	1	1	1	1	1	1
41205	Diagnoses - secondary ICD9	17289	0	1	1	1	1	1	1	1	1	1	1	1	1	1	1	1	1	1	1	1	1	1	1
41206	Intended management of patient (polymorphic)	166040	-0.0724414	1.39846e-36	1.14214e-28	2.55219e-34	2.66815e-32	8.03768e-29	3.14189e-34	9.06722e-37	3.69499e-42	4.93495e-35	6.02785e-38	2.23159e-80	1.90694e-14	4.67352e-08	6.41565e-13	1.47372e-11	1.48895e-11	4.74168e-16	2.03235e-14	1.8204e-19	1.70869e-17	2.54167e-15	1.91926e-23
41207	Main speciality of consultant (polymorphic)	1096529	0	1	1	1	1	1	1	1	1	1	1	1	1	1	1	1	1	1	1	1	1	1	1
41208	Treatment speciality of consultant (polymorphic)	1228027	0	1	1	1	1	1	1	1	1	1	1	1	1	1	1	1	1	1	1	1	1	1	1
41209	Patient classification on admission (polymorphic)	666551	0	1	1	1	1	1	1	1	1	1	1	1	1	1	1	1	1	1	1	1	1	1	1
41210	Operative procedures - secondary OPCS4	2041211	0	1	1	1	1	1	1	1	1	1	1	1	1	1	1	1	1	1	1	1	1	1	1
41211	Destinations on discharge from hospital (polymorphic)	540214	0	1	1	1	1	1	1	1	1	1	1	1	1	1	1	1	1	1	1	1	1	1	1
41212	Methods of admission to hospital (polymorphic)	1003664	0	1	1	1	1	1	1	1	1	1	1	1	1	1	1	1	1	1	1	1	1	1	1
41213	Methods of discharge from hospital (polymorphic)	180663	-0.091314	6.97236e-39	3.83579e-56	2.95257e-87	3.23193e-37	1.56143e-31	5.62863e-31	3.57859e-53	2.16268e-52	3.4075e-46	3.3841e-36	1.43116e-25	8.40363e-24	8.21638e-58	5.221e-36	1.60765e-15	5.1808e-27	2.04961e-24	2.68575e-32	1.16612e-37	4.95819e-30	4.11145e-19	1.94281e-09
41214	Carer support indicators	123651	0	1	1	1	1	1	1	1	1	1	1	1	1	1	1	1	1	1	1	1	1	1	1
41215	Detention categories	19945	0.575585	0.0100019	0.0598103	0.0876534	0.022477	0.00314529	0.00554921	0.0200046	0.000257367	0.0126926	0.0231531	0.250191	0.552122	0.512491	0.493216	0.0906173	0.529375	0.788327	0.81353	0.232286	0.30855	0.497872	0.450225
41216	Legal statuses	8	0	1	1	1	1	1	1	1	1	1	1	1	1	1	1	1	1	1	1	1	1	1	1
41217	Mental categories	9	-9.5882	0.446594	0.667884	0.309441	0.445697	0.35505	0.401767	0.68524	0.434851	0.454542	0.421619	0.890386	0.0425489	0.0840761	0.045671	0.0564041	0.0533576	0.291678	0.0511199	0.105022	0.0498522	0.0285251	0.109191
41218	History of psychiatric care on admission	158415	-1.01743	1.54201e-14	7.73436e-14	2.128e-15	3.8425e-15	2.8975e-14	2.68388e-13	2.8413e-16	2.12758e-12	8.7426e-17	8.22412e-16	4.03526e-18	1.0808e-07	5.62449e-08	5.87204e-07	5.60058e-07	7.06567e-13	1.39329e-07	4.94224e-07	4.60505e-06	7.04642e-08	1.41603e-06	3.61463e-07
41219	Anaesthetics administered during delivery	12197	-0.459355	1	1	1	1	1	1	1	1	1	1	1	0.069881	0.0172345	0.0502334	0.18264	0.0829564	0.0284547	0.0739832	0.15772	0.0927449	0.0463141	0.184721
41220	Anaesthetics administered post delivery	12197	1.53388	1	1	1	1	1	1	1	1	1	1	1	0.122685	0.0357449	0.11246	0.0749379	0.148779	0.0940299	0.252028	0.0418951	0.0939548	0.10448	0.193794
41221	Delivery methods	12195	-0.497642	1	1	1	1	1	1	1	1	1	1	1	3.05439e-05	0.0016798	9.77231e-06	2.39683e-06	1.09795e-05	1.83144e-05	4.15745e-05	4.31893e-07	7.92476e-06	6.49574e-06	0.000361573
41222	Delivery onset methods	12197	-0.539755	1	1	1	1	1	1	1	1	1	1	1	3.74468e-06	0.00128526	1.67387e-06	5.21244e-08	1.7081e-06	2.59565e-06	1.77181e-05	1.35945e-07	7.65493e-07	6.8413e-07	0.000209725
41223	Delivery places	12197	1.06902	1	1	1	1	1	1	1	1	1	1	1	0.0278685	0.0469894	0.0405463	0.1156	0.0698628	0.0223717	0.025316	0.0192571	0.0456634	0.0574284	0.0134399
41224	Intended delivery places	12197	-0.373949	1	1	1	1	1	1	1	1	1	1	1	0.0497122	0.0723602	0.0232402	0.0153023	0.0820782	0.0691269	0.0713559	0.134259	0.0530957	0.0657852	0.0470617
41225	Resuscitation methods	12197	-0.852495	1	1	1	1	1	1	1	1	1	1	1	0.0277097	0.0536131	0.032502	0.0192455	0.028289	0.0290371	0.0596158	0.05719	0.0295345	0.0227787	0.014463
41226	Sex of baby	11448	0.442958	1	1	1	1	1	1	1	1	1	1	1	0.552638	0.437992	0.507511	0.662593	0.389778	0.633462	0.803896	0.445762	0.477233	0.617014	0.366743
41227	Status of baby at birth	12197	-1.31098	1	1	1	1	1	1	1	1	1	1	1	0.198007	0.11931	0.127036	0.136166	0.113424	0.315817	0.253427	0.213902	0.322234	0.287481	0.21378
41228	Statuses of person conducting delivery	12197	0.513988	1	1	1	1	1	1	1	1	1	1	1	1.71158e-10	4.79731e-07	4.725e-11	4.93897e-10	2.12799e-10	6.41078e-10	6.16322e-10	2.34441e-14	1.05345e-10	7.47516e-12	9.08276e-07
41229	PCT responsible for patient data	337759	0	1	1	1	1	1	1	1	1	1	1	1	1	1	1	1	1	1	1	1	1	1	1
41230	PCT where patients GP was registered	522012	0	1	1	1	1	1	1	1	1	1	1	1	1	1	1	1	1	1	1	1	1	1	1
41231	Hospital episode type	158415	0.550098	0.0336385	0.0827049	0.0151224	0.0362321	0.00665152	0.0182935	0.0272253	0.016512	0.443496	0.0551003	0.0370302	6.97938e-08	6.90149e-05	9.06707e-09	1.52268e-08	1.61203e-07	4.13239e-09	8.3161e-06	8.05416e-08	4.23502e-07	1.06106e-08	1.47935e-08
41232	Administrative and legal statuses	153120	0	1	1	1	1	1	1	1	1	1	1	1	1	1	1	1	1	1	1	1	1	1	1
41233	Sources of admission to hospital (polymorphic)	180664	-0.207479	1.37625e-153	4.70255e-141	1.67368e-126	5.28011e-130	8.17339e-144	1.93737e-147	8.12799e-150	9.06733e-162	1.36714e-156	1.45022e-160	8.81234e-187	9.64787e-116	1.8356e-87	3.38093e-99	1.45124e-79	2.21562e-113	5.41646e-133	3.34921e-100	9.11388e-117	5.29607e-125	3.39089e-123	1.18398e-132
41235	Spells in hospital	145932	-0.257127	1.13356e-151	8.42997e-160	5.90803e-165	1.09712e-122	1.37421e-163	3.23585e-126	1.90993e-164	2.52128e-173	7.47999e-152	7.24053e-159	4.02832e-128	1.50759e-141	3.08185e-139	3.79975e-152	2.51054e-88	5.14111e-136	2.23854e-140	2.97496e-144	2.21249e-171	2.30706e-143	2.59154e-143	3.8898e-101
41244	Intended management of patient (recoded)	166041	0.560679	1.55541e-209	2.98922e-213	8.94916e-215	3.70796e-185	8.78359e-208	1.66903e-199	9.19967e-216	4.92867e-221	4.50713e-233	1.3369e-209	3.08236e-130	2.14457e-179	1.42842e-211	4.37911e-189	1.76751e-166	1.23664e-223	8.75661e-193	1.22348e-185	3.91984e-200	3.74525e-212	7.55314e-178	2.86079e-69
41245	Main speciality of consultant (recoded)	1096560	0	1	1	1	1	1	1	1	1	1	1	1	1	1	1	1	1	1	1	1	1	1	1
41246	Treatment speciality of consultant (recoded)	1214328	0	1	1	1	1	1	1	1	1	1	1	1	1	1	1	1	1	1	1	1	1	1	1
41247	Patient classification on admission (recoded)	666822	0	1	1	1	1	1	1	1	1	1	1	1	1	1	1	1	1	1	1	1	1	1	1
41248	Destinations on discharge from hospital (recoded)	538754	0	1	1	1	1	1	1	1	1	1	1	1	1	1	1	1	1	1	1	1	1	1	1
41249	Methods of admission to hospital (recoded)	999381	0	1	1	1	1	1	1	1	1	1	1	1	1	1	1	1	1	1	1	1	1	1	1
41250	Methods of discharge from hospital (recoded)	525999	0	1	1	1	1	1	1	1	1	1	1	1	1	1	1	1	1	1	1	1	1	1	1
41251	Sources of admission to hospital (recoded)	476112	0	1	1	1	1	1	1	1	1	1	1	1	1	1	1	1	1	1	1	1	1	1	1
41253	Inpatient record format	180665	-0.297496	1.07026e-22	5.10882e-11	4.11441e-11	3.95478e-15	9.1493e-28	6.77489e-25	6.82256e-15	4.73742e-18	3.55694e-19	6.62861e-27	7.60972e-61	2.06046e-14	1.23251e-15	5.37551e-13	6.2122e-14	7.1514e-14	1.04783e-18	3.84416e-12	7.22364e-14	2.2417e-16	1.5659e-19	8.26097e-45
41260	Date of first operative procedure - main OPCS4	1655848	0	1	1	1	1	1	1	1	1	1	1	1	1	1	1	1	1	1	1	1	1	1	1
41262	Date of first in-patient diagnosis - main ICD10	1726307	0	1	1	1	1	1	1	1	1	1	1	1	1	1	1	1	1	1	1	1	1	1	1
41270	Diagnoses - ICD10	4131460	0	1	1	1	1	1	1	1	1	1	1	1	1	1	1	1	1	1	1	1	1	1	1
41272	Operative procedures - OPCS4	3640192	0	1	1	1	1	1	1	1	1	1	1	1	1	1	1	1	1	1	1	1	1	1	1
41280	Date of first in-patient diagnosis - ICD10	4131560	0	1	1	1	1	1	1	1	1	1	1	1	1	1	1	1	1	1	1	1	1	1	1
41282	Date of first operative procedure - OPCS4	3640264	0	1	1	1	1	1	1	1	1	1	1	1	1	1	1	1	1	1	1	1	1	1	1
42000	Date of myocardial infarction	20815	0	1	1	1	1	1	1	1	1	1	1	1	1	1	1	1	1	1	1	1	1	1	1
42001	Source of myocardial infarction report	3940	0.693175	1.00477e-22	3.50184e-23	7.10482e-23	9.44519e-29	4.78876e-16	6.12299e-23	1.17702e-23	2.2374e-22	4.78071e-20	1.32535e-22	8.11561e-25	9.35008e-05	1.95194e-05	2.1816e-05	1.2819e-08	0.2228	0.00042987	2.0723e-06	7.69273e-06	0.00112121	6.30215e-05	4.33692e-05
42002	Date of STEMI	5711	0	1	1	1	1	1	1	1	1	1	1	1	1	1	1	1	1	1	1	1	1	1	1
42003	Source of STEMI report	884	0	1	1	1	1	1	1	1	1	1	1	1	1	1	1	1	1	1	1	1	1	1	1
42004	Date of NSTEMI	7084	0	1	1	1	1	1	1	1	1	1	1	1	1	1	1	1	1	1	1	1	1	1	1
42005	Source of NSTEMI report	1501	0.0591178	0.0703463	0.131067	0.0756529	0.0727772	0.0288674	0.100407	0.0943004	0.104159	0.0653191	0.138002	0.0899151	0.892524	0.7135	0.812033	0.30297	0.13116	0.909423	0.778999	0.796351	0.685675	0.793282	0.463973
42006	Date of stroke	13134	0	1	1	1	1	1	1	1	1	1	1	1	1	1	1	1	1	1	1	1	1	1	1
42007	Source of stroke report	4330	0.626043	1.32017e-05	2.72799e-08	1.67532e-05	7.75198e-08	8.94821e-05	1.42807e-05	1.9958e-06	4.74039e-08	9.2263e-06	7.38183e-06	0.000207601	1.11232e-05	9.20294e-08	4.63433e-06	2.01825e-08	0.00648694	1.56412e-06	4.56072e-06	1.49385e-07	2.31823e-05	1.05238e-05	4.10601e-05
42008	Date of ischaemic stroke	6087	0	1	1	1	1	1	1	1	1	1	1	1	1	1	1	1	1	1	1	1	1	1	1
42009	Source of ischaemic stroke report	1749	-0.175324	0.60891	0.643	0.748006	0.413012	0.26897	0.61735	0.564129	0.61261	0.559888	0.658271	0.571187	0.958356	0.803931	0.957181	0.868392	0.535091	0.974561	0.815537	0.73515	0.817047	0.682931	0.687183
42010	Date of intracerebral haemorrhage	1341	0	1	1	1	1	1	1	1	1	1	1	1	1	1	1	1	1	1	1	1	1	1	1
42011	Source of intracerebral haemorrhage report	448	0.872314	0.141651	0.0633012	0.207435	0.0929338	0.0297776	0.133711	0.115894	0.494715	0.289426	0.0534958	0.343858	0.189411	0.131687	0.0978268	0.0383988	0.0733104	0.115477	0.285152	0.364768	0.342275	0.164444	0.218692
42012	Date of subarachnoid haemorrhage	1441	0	1	1	1	1	1	1	1	1	1	1	1	1	1	1	1	1	1	1	1	1	1	1
42013	Source of subarachnoid haemorrhage report	703	0.421468	0.117544	0.0836934	0.166202	0.112499	0.22213	0.122555	0.202904	0.18572	0.127432	0.16119	0.102241	0.313863	0.0740208	0.283431	0.14677	0.885533	0.345318	0.243092	0.120535	0.221915	0.431137	0.549542
10004	Medication for pain relief, constipation, heartburn (pilot)	0	0	1	1	1	1	1	1	1	1	1	1	1	1	1	1	1	1	1	1	1	1	1	1
10005	Medication for smoking cessation, constipation, heartburn, allergies (pilot)	0	0	1	1	1	1	1	1	1	1	1	1	1	1	1	1	1	1	1	1	1	1	1	1
10006	Mouth/teeth dental problems (pilot)	0	0	1	1	1	1	1	1	1	1	1	1	1	1	1	1	1	1	1	1	1	1	1	1
10007	Vitamin and mineral supplements (pilot)	0	0	1	1	1	1	1	1	1	1	1	1	1	1	1	1	1	1	1	1	1	1	1	1
10016	Regular use of hands-free device/speakerphone with mobile phone (pilot)	2922	0	1	1	1	1	1	1	1	1	1	1	1	1	1	1	1	1	1	1	1	1	1	1
10105	Internet user (pilot)	3768	0	1	1	1	1	1	1	1	1	1	1	1	1	1	1	1	1	1	1	1	1	1	1
10114	Willing to be contacted by email (pilot)	3716	0	1	1	1	1	1	1	1	1	1	1	1	1	1	1	1	1	1	1	1	1	1	1
10115	Why stopped smoking (pilot)	0	0	1	1	1	1	1	1	1	1	1	1	1	1	1	1	1	1	1	1	1	1	1	1
10132	Type of progestan-only oral contraceptive used (pilot)	0	0	1	1	1	1	1	1	1	1	1	1	1	1	1	1	1	1	1	1	1	1	1	1
10133	Number of columns displayed in round (pilot)	0	0	1	1	1	1	1	1	1	1	1	1	1	1	1	1	1	1	1	1	1	1	1	1
10134	Number of rows displayed in round (pilot)	0	0	1	1	1	1	1	1	1	1	1	1	1	1	1	1	1	1	1	1	1	1	1	1
10136	Number of correct matches in round (pilot)	0	0	1	1	1	1	1	1	1	1	1	1	1	1	1	1	1	1	1	1	1	1	1	1
10137	Number of incorrect matches in round (pilot)	0	0	1	1	1	1	1	1	1	1	1	1	1	1	1	1	1	1	1	1	1	1	1	1
10138	Time to complete round (pilot)	0	0	1	1	1	1	1	1	1	1	1	1	1	1	1	1	1	1	1	1	1	1	1	1
10139	Index for card A in round (pilot)	74300	0	1	1	1	1	1	1	1	1	1	1	1	1	1	1	1	1	1	1	1	1	1	1
10140	Index for card B in round (pilot)	74300	0	1	1	1	1	1	1	1	1	1	1	1	1	1	1	1	1	1	1	1	1	1	1
10141	Number of times snap-button pressed (pilot)	0	0	1	1	1	1	1	1	1	1	1	1	1	1	1	1	1	1	1	1	1	1	1	1
10142	Number of columns displayed (pilot)	0	0	1	1	1	1	1	1	1	1	1	1	1	1	1	1	1	1	1	1	1	1	1	1
10143	Number of rows displayed (pilot)	0	0	1	1	1	1	1	1	1	1	1	1	1	1	1	1	1	1	1	1	1	1	1	1
10144	Time taken to complete lights test (pilot)	0	0	1	1	1	1	1	1	1	1	1	1	1	1	1	1	1	1	1	1	1	1	1	1
10145	Pattern of lights displayed (pilot)	0	0	1	1	1	1	1	1	1	1	1	1	1	1	1	1	1	1	1	1	1	1	1	1
10146	Pattern of lights as remembered (pilot)	11145	0	1	1	1	1	1	1	1	1	1	1	1	1	1	1	1	1	1	1	1	1	1	1
10147	Duration to first press of snap-button in each round (pilot)	0	0	1	1	1	1	1	1	1	1	1	1	1	1	1	1	1	1	1	1	1	1	1	1
10241	Touchscreen duration (pilot)	0	0	1	1	1	1	1	1	1	1	1	1	1	1	1	1	1	1	1	1	1	1	1	1
10609	Words answer array (pilot)	0	0	1	1	1	1	1	1	1	1	1	1	1	1	1	1	1	1	1	1	1	1	1	1
10610	Word count (pilot)	3599	0	1	1	1	1	1	1	1	1	1	1	1	1	1	1	1	1	1	1	1	1	1	1
10612	Number of words beginning with 'S' (pilot)	0	0	1	1	1	1	1	1	1	1	1	1	1	1	1	1	1	1	1	1	1	1	1	1
10691	Result ranking (pilot)	0	0	1	1	1	1	1	1	1	1	1	1	1	1	1	1	1	1	1	1	1	1	1	1
10693	Acceptability of each blow result (pilot)	0	0	1	1	1	1	1	1	1	1	1	1	1	1	1	1	1	1	1	1	1	1	1	1
10694	Forced vital capacity (FVC) (pilot)	0	0	1	1	1	1	1	1	1	1	1	1	1	1	1	1	1	1	1	1	1	1	1	1
10695	Forced expiratory volume in 1-second (FEV1) (pilot)	0	0	1	1	1	1	1	1	1	1	1	1	1	1	1	1	1	1	1	1	1	1	1	1
10696	Peak expiratory flow (PEF) (pilot)	0	0	1	1	1	1	1	1	1	1	1	1	1	1	1	1	1	1	1	1	1	1	1	1
10697	Data points for blow (pilot)	10183	0	1	1	1	1	1	1	1	1	1	1	1	1	1	1	1	1	1	1	1	1	1	1
10711	Spirometry method (pilot)	0	0	1	1	1	1	1	1	1	1	1	1	1	1	1	1	1	1	1	1	1	1	1	1
10714	Spirometry device serial number (pilot)	3427	0	1	1	1	1	1	1	1	1	1	1	1	1	1	1	1	1	1	1	1	1	1	1
10717	Number of measurements made (pilot)	0	0	1	1	1	1	1	1	1	1	1	1	1	1	1	1	1	1	1	1	1	1	1	1
10721	Illness, injury, bereavement, stress in last 2 years (pilot)	0	0	1	1	1	1	1	1	1	1	1	1	1	1	1	1	1	1	1	1	1	1	1	1
10722	Qualifications (pilot)	0	0	1	1	1	1	1	1	1	1	1	1	1	1	1	1	1	1	1	1	1	1	1	1
10723	Vitamin supplements (pilot)	0	0	1	1	1	1	1	1	1	1	1	1	1	1	1	1	1	1	1	1	1	1	1	1
10740	Frequency of friend/family visits (pilot)	0	0	1	1	1	1	1	1	1	1	1	1	1	1	1	1	1	1	1	1	1	1	1	1
10749	Time using mobile phone in last 3 months (pilot)	0	0	1	1	1	1	1	1	1	1	1	1	1	1	1	1	1	1	1	1	1	1	1	1
10767	Spread type (pilot)	0	0	1	1	1	1	1	1	1	1	1	1	1	1	1	1	1	1	1	1	1	1	1	1
10776	Bread type/intake (pilot)	0	0	1	1	1	1	1	1	1	1	1	1	1	1	1	1	1	1	1	1	1	1	1	1
10793	Hearing difficulty/problems (pilot)	3656	0	1	1	1	1	1	1	1	1	1	1	1	1	1	1	1	1	1	1	1	1	1	1
10818	Reason for reducing amount of alcohol drunk (pilot)	0	0	1	1	1	1	1	1	1	1	1	1	1	1	1	1	1	1	1	1	1	1	1	1
10827	Ever stopped smoking for 6+ months (pilot)	916	0	1	1	1	1	1	1	1	1	1	1	1	1	1	1	1	1	1	1	1	1	1	1
10844	Gestational diabetes only (pilot)	63	0	1	1	1	1	1	1	1	1	1	1	1	1	1	1	1	1	1	1	1	1	1	1
10853	Reason former drinker stopped drinking alcohol (pilot)	0	0	1	1	1	1	1	1	1	1	1	1	1	1	1	1	1	1	1	1	1	1	1	1
10854	Other dietary supplements (pilot)	0	0	1	1	1	1	1	1	1	1	1	1	1	1	1	1	1	1	1	1	1	1	1	1
10855	Never eat eggs, dairy, wheat, sugar (pilot)	0	0	1	1	1	1	1	1	1	1	1	1	1	1	1	1	1	1	1	1	1	1	1	1
10860	Gas or solid-fuel cooking/heating (pilot)	0	0	1	1	1	1	1	1	1	1	1	1	1	1	1	1	1	1	1	1	1	1	1	1
10877	Average total household income before tax (pilot)	0	0	1	1	1	1	1	1	1	1	1	1	1	1	1	1	1	1	1	1	1	1	1	1
10886	Difference in mobile phone use compared to one year previously (pilot)	0	0	1	1	1	1	1	1	1	1	1	1	1	1	1	1	1	1	1	1	1	1	1	1
10895	Light smokers, at least 100 smokes in lifetime (pilot)	935	0	1	1	1	1	1	1	1	1	1	1	1	1	1	1	1	1	1	1	1	1	1	1
10912	Variation in diet (pilot)	0	0	1	1	1	1	1	1	1	1	1	1	1	1	1	1	1	1	1	1	1	1	1	1
10953	Duration of walks (pilot)	0	0	1	1	1	1	1	1	1	1	1	1	1	1	1	1	1	1	1	1	1	1	1	1
10962	Duration of moderate physical activity (pilot)	0	0	1	1	1	1	1	1	1	1	1	1	1	1	1	1	1	1	1	1	1	1	1	1
10971	Duration of vigorous physical activity (pilot)	0	0	1	1	1	1	1	1	1	1	1	1	1	1	1	1	1	1	1	1	1	1	1	1
100008	Total sugars	30099	0.00593468	0.0464491	0.0567899	0.00103819	0.00171349	0.063261	0.0122563	0.142555	0.104233	0.467095	0.00634156	0.00480978	0.78166	0.0340344	0.169158	0.280316	0.246067	0.554495	0.287343	0.345294	0.921705	0.278058	0.620845
100018	Retinol	29359	-0.0732589	0.175313	0.107752	0.00709115	0.050568	0.681234	0.0236763	0.386104	0.24003	0.290759	0.052419	0.0799098	0.000731508	0.000511146	0.0211083	0.0111574	0.000109728	0.000351565	0.00872929	0.000206823	0.179797	0.0150186	0.00014556
110001	Invitation to complete online 24-hour recall dietary questionnaire, acceptance	141165	0.226174	0.00163377	0.201726	0.00155601	0.00388577	4.19596e-07	0.00109546	0.00220303	0.0042819	2.62644e-05	0.000768594	3.33292e-07	2.29002e-27	4.17504e-15	3.15089e-30	2.8688e-30	9.23121e-42	1.48664e-31	6.61675e-25	2.27501e-22	1.39737e-25	8.09669e-29	1.12373e-34
110002	Invitation to complete online 24-hour recall dietary questionnaire, date sent	1265219	0	1	1	1	1	1	1	1	1	1	1	1	1	1	1	1	1	1	1	1	1	1	1
110005	Invitation to physical activity study, acceptance	102604	0.341943	1.25755e-19	2.45717e-14	2.45933e-19	4.44342e-21	9.83564e-20	1.39778e-20	7.83526e-20	2.84353e-14	4.07407e-22	2.31816e-19	1.40157e-26	1.58694e-49	4.42941e-32	4.32603e-55	8.82343e-51	4.29641e-53	5.86386e-56	5.18849e-49	1.73661e-35	1.20721e-50	1.09802e-50	8.90088e-64
110006	Invitation to physical activity study, date sent	233455	0	1	1	1	1	1	1	1	1	1	1	1	1	1	1	1	1	1	1	1	1	1	1
110008	Invitation to assessment centre, date sent	107365	0	1	1	1	1	1	1	1	1	1	1	1	1	1	1	1	1	1	1	1	1	1	1
12139	Believed safe to perform brain MRI scan	18385	0.095135	0.052267	0.0571884	0.0841633	0.0610041	0.154357	0.0388124	0.0591595	0.318095	0.0562438	0.0461638	0.00544211	0.740343	0.827275	0.82081	0.719922	0.737868	0.783792	0.552466	0.944187	0.525059	0.579822	0.817932
12140	Believed safe to perform abdominal MRI scan	18385	0.129901	0.0409177	0.0495107	0.0569412	0.0536175	0.119422	0.0286638	0.0486491	0.312267	0.0436332	0.0356376	0.00425021	0.774275	0.910516	0.809488	0.705092	0.809192	0.81553	0.812319	0.876229	0.578067	0.599231	0.677322
12141	Believed safe to perform DXA scan	18385	-1.88448	0.317199	0.30855	0.212508	0.343613	0.431409	0.296456	0.331902	0.724579	0.230695	0.16167	0.33796	0.365115	0.285602	0.458802	0.228026	0.249523	0.269799	0.23533	0.697886	0.313984	0.490437	0.420789
12143	Weight (pre-imaging)	18385	0.147698	3.30084e-20	3.14098e-20	1.07674e-29	3.1921e-19	2.97551e-21	1.5206e-20	2.7638e-18	1.50379e-17	2.17671e-22	1.18794e-21	1.85223e-20	2.71323e-08	3.95772e-10	0.00553756	6.67047e-06	2.46209e-13	5.33213e-07	5.00635e-07	9.43668e-08	3.54579e-10	3.25697e-09	9.35403e-08
12144	Height	18385	0.490801	3.08017e-55	3.73895e-58	5.2541e-58	1.98768e-60	2.57812e-63	2.06613e-61	4.86274e-55	3.3933e-72	1.62633e-58	1.02315e-77	7.70837e-59	7.95248e-77	4.70328e-77	2.66129e-76	4.30616e-84	1.35646e-92	1.56697e-76	8.37521e-82	3.75766e-107	5.37273e-73	2.28056e-114	5.04365e-84
12148	Number of imaging stages blocked at screening	18385	-0.0870551	2.24672e-09	7.22106e-09	2.60714e-10	1.90415e-07	2.69866e-06	5.90612e-09	1.01056e-08	3.48871e-06	7.7668e-10	5.12377e-10	6.35931e-11	0.00105417	0.000185644	0.00167519	0.0192852	0.0292679	0.000518202	2.30911e-05	0.000385614	1.28094e-05	0.00113116	0.0483999
12187	Brain MRI measuring method	18139	-0.418636	0.319342	0.450835	0.379234	0.303515	0.227873	0.334647	0.296088	0.378537	0.527795	0.505388	0.0904924	0.00552417	0.0215896	0.00437923	0.00780303	0.0382514	0.00307665	0.00434616	0.00136375	0.00130936	0.00612189	0.0017585
12188	Brain MRI measurement completed	17413	-0.967107	0.328829	0.541112	0.485021	0.433941	0.383804	0.314667	0.247453	0.300492	0.541473	0.345793	0.191426	0.110391	0.893784	0.0890781	0.477518	0.128074	0.0426594	0.126073	0.0501789	0.165354	0.117614	0.0411392
12223	Abdominal MRI measuring method	18170	-0.496866	0.136676	0.185627	0.186517	0.257342	0.0769667	0.103549	0.0868367	0.187932	0.0867853	0.214582	0.313267	0.0101982	0.154097	0.0074628	0.0247834	0.0245091	0.00395638	0.0119395	0.014517	0.00643574	0.0084926	0.00206778
12224	Abdominal MRI measurement completed	42086	0	1	1	1	1	1	1	1	1	1	1	1	1	1	1	1	1	1	1	1	1	1	1
12253	DXA measuring method	18296	0.124024	0.0432317	0.138346	0.0915494	0.0306306	0.0180928	0.0363719	0.0709648	0.043137	0.0672773	0.0345917	0.0972901	0.525617	0.457045	0.612787	0.825601	0.663202	0.776971	0.283146	0.592822	0.46795	0.651722	0.4365
12254	DXA measurement completed	42443	0	1	1	1	1	1	1	1	1	1	1	1	1	1	1	1	1	1	1	1	1	1	1
12291	Carotid ultrasound measuring method	18286	0.135299	0.113615	0.0698037	0.0913807	0.0940057	0.0934773	0.112604	0.134658	0.1047	0.121267	0.111564	0.188043	0.504473	0.702857	0.496983	0.393547	0.38675	0.457355	0.572809	0.242015	0.612091	0.59304	0.763216
12292	Carotid ultrasound measurement completed	43021	0	1	1	1	1	1	1	1	1	1	1	1	1	1	1	1	1	1	1	1	1	1	1
12323	12-lead ECG measuring method	18197	0.0495306	0.0365638	0.00766948	0.193438	0.0418171	0.0249622	0.0449292	0.0318325	0.0179416	0.0236297	0.0428681	0.34445	0.658336	0.50113	0.650682	0.520942	0.63633	0.787027	0.580883	0.950135	0.498711	0.694651	0.160342
12336	Ventricular rate	15973	-0.154146	0.0150336	0.00168496	0.106039	0.325557	0.000291331	0.0445889	0.0604401	0.0356615	0.0935008	0.0166192	0.112646	7.58839e-08	2.29809e-05	7.62675e-10	2.7282e-13	0.244206	8.45953e-09	6.75807e-10	1.05495e-08	8.24066e-07	4.29258e-09	3.95985e-10
12338	P duration	15222	-0.00796274	0.488537	0.584381	0.630995	0.71406	0.786111	0.322232	0.421671	0.173108	0.272953	0.436166	0.65188	0.786498	0.908775	0.890638	0.893552	0.465383	0.934989	0.801533	0.692724	0.502226	0.87342	0.796607
12340	QRS duration	15972	-0.0141532	0.3934	0.327801	0.871915	0.16437	0.322483	0.578614	0.41973	0.0166514	0.622916	0.521258	0.817538	0.621715	0.220423	0.862459	0.398253	0.0853947	0.99553	0.538008	0.806747	0.539399	0.956065	0.872959
12624	Identifier for blood pressure device	41135	0	1	1	1	1	1	1	1	1	1	1	1	1	1	1	1	1	1	1	1	1	1	1
12651	Duration of eprime test	15008	0.0259347	0.485131	0.647634	0.66245	0.552235	0.503085	0.407162	0.630623	0.621872	0.255117	0.365896	0.324095	0.378804	0.455796	0.383384	0.455551	0.333144	0.286729	0.280331	0.491842	0.250716	0.336816	0.419687
12653	ECG automated diagnoses	217327	0	1	1	1	1	1	1	1	1	1	1	1	1	1	1	1	1	1	1	1	1	1	1
12654	Number of automated diagnostic comments recorded during 12-lead ECG	15971	-0.0839757	4.97461e-05	0.000559436	3.08371e-05	4.90943e-06	0.00967345	7.00397e-05	4.89493e-05	9.32769e-07	0.000193912	0.000333376	9.39877e-06	0.00341084	0.0426499	0.00238693	0.000458445	0.0187549	0.00427692	0.00214151	0.000695916	0.002404	0.00523488	0.00462621
12657	Suspicious flag for 12-lead ECG	847	0	1	1	1	1	1	1	1	1	1	1	1	1	1	1	1	1	1	1	1	1	1	1
12658	Identifier for 12-lead ECG device	40077	0	1	1	1	1	1	1	1	1	1	1	1	1	1	1	1	1	1	1	1	1	1	1
12671	PWA start time	72691	0	1	1	1	1	1	1	1	1	1	1	1	1	1	1	1	1	1	1	1	1	1	1
12673	Heart rate during PWA	15343	-0.154316	0.0884118	0.0311098	0.226282	0.671277	0.00708828	0.217227	0.210471	0.0962374	0.287636	0.0901866	0.368818	1.26588e-07	5.99157e-06	1.03945e-08	1.26122e-11	0.121006	5.13234e-08	5.85877e-09	1.17061e-06	5.16574e-07	7.61306e-09	1.23005e-10
12674	Systolic brachial blood pressure during PWA	15248	-0.309673	5.81958e-13	4.67667e-11	3.05189e-14	2.60278e-15	0.589876	2.82263e-14	1.72523e-14	4.60382e-15	1.12124e-14	9.25734e-15	5.27387e-18	3.77989e-26	1.26433e-21	6.53189e-27	8.02089e-32	0.220391	9.90464e-27	2.13649e-29	2.09912e-33	1.17962e-26	6.20133e-28	3.08287e-36
12675	Diastolic brachial blood pressure during PWA	15248	-0.0172529	0.907872	0.498394	0.675073	0.894316	0.370333	0.785934	0.634053	0.873906	0.587552	0.929648	0.955866	0.556369	0.432422	0.860028	0.226921	0.692077	0.917875	0.529073	0.131745	0.308368	0.525572	0.59462
12676	Peripheral pulse pressure during PWA	15245	-0.332179	2.58356e-17	4.92898e-16	7.27567e-20	1.46388e-20	0.976908	1.62043e-19	7.36673e-18	1.93584e-19	6.20783e-18	1.08673e-19	5.28131e-24	7.51058e-30	5.96454e-24	4.99784e-32	1.32926e-34	0.129122	5.27377e-32	1.35823e-33	1.28739e-35	4.05551e-29	7.32089e-32	3.1951e-42
12677	Central systolic blood pressure during PWA	15248	-0.308531	4.45005e-12	1.36407e-09	7.24423e-13	2.20127e-14	0.77966	2.10934e-13	5.79738e-14	1.04843e-14	8.68972e-14	1.01846e-13	8.33431e-17	5.73649e-26	1.50266e-20	1.49191e-26	2.77722e-31	0.0732882	7.5317e-27	5.67282e-29	8.58136e-34	1.18866e-26	8.98626e-28	6.91135e-36
12678	Central pulse pressure during PWA	15245	-0.335373	1.63678e-16	2.6534e-14	2.07006e-18	8.75154e-20	0.776076	8.83795e-19	1.39163e-17	1.96963e-19	3.53624e-17	9.84788e-19	6.03147e-23	2.13225e-30	2.92739e-23	2.05201e-32	7.63682e-35	0.0291929	5.42644e-33	6.07077e-34	5.64876e-37	7.3981e-30	1.73911e-32	6.85298e-43
12679	Number of beats in waveform average for PWA	15343	-0.14261	0.154752	0.0681582	0.320736	0.850648	0.00681566	0.275263	0.413866	0.0779425	0.46876	0.18537	0.332802	1.04717e-06	2.35282e-05	1.95033e-07	3.35276e-10	0.36622	7.96279e-07	1.43701e-08	1.44321e-05	3.5877e-06	9.79905e-08	3.30953e-09
12680	Central augmentation pressure during PWA	15244	-0.238443	1.7772e-05	0.00379554	2.63849e-05	9.03456e-07	0.107056	1.25339e-06	7.30165e-07	1.71833e-08	1.56259e-05	1.61326e-06	1.72303e-06	3.98808e-16	1.27842e-10	1.65879e-16	3.61688e-17	6.31056e-06	5.32378e-20	1.83776e-16	2.47454e-20	2.48172e-16	1.0683e-17	6.95707e-21
12681	Augmentation index for PWA	15341	-0.0768728	0.728165	0.0897084	0.427231	0.929618	0.294057	0.996035	0.602249	0.33051	0.714925	0.935267	0.68067	0.00850472	0.184392	0.0145741	0.0117388	3.64524e-06	0.000373012	0.025116	0.000622671	0.00690585	0.00353177	0.00714166
12682	Cardiac output during PWA	15009	-0.343737	2.42905e-12	5.1155e-11	7.68101e-15	4.81496e-16	0.541038	4.17319e-14	2.03875e-13	2.41192e-13	1.77268e-13	1.21413e-13	2.29249e-18	2.01163e-31	2.15997e-23	9.86406e-35	9.13923e-40	0.115162	7.575e-33	2.38788e-36	9.29207e-37	3.60135e-30	5.89528e-34	4.03884e-43
12683	End systolic pressure during PWA	15214	-0.220765	1.99119e-09	5.1157e-07	2.71863e-09	5.35292e-11	0.350241	3.05405e-10	4.83612e-11	1.15283e-11	3.42873e-10	1.34738e-11	1.49361e-11	5.23585e-14	4.29022e-12	1.19008e-13	6.64493e-18	0.0785522	4.024e-14	3.50895e-15	4.0585e-19	1.40729e-14	1.42947e-15	8.2712e-20
12684	End systolic pressure index during PWA	14986	0.0548722	0.00521567	0.0114058	0.00990902	0.00744178	0.000336242	0.00473066	0.00361812	0.00027917	0.050736	0.00011694	0.0114927	0.0635233	0.695292	0.0165754	0.00709004	0.0909008	0.101338	0.040293	0.0948534	0.0991224	0.130679	0.0479626
12685	Total peripheral resistance during PWA	15214	0.0381279	0.837798	0.827326	0.833802	0.722267	0.626144	0.922508	0.597905	0.946385	0.822264	0.716917	0.71779	0.194077	0.0328334	0.214163	0.392161	0.46109	0.230851	0.244181	0.558629	0.215881	0.264686	0.140084
12686	Stroke volume during PWA	15009	-0.30364	3.11829e-19	3.50703e-18	2.98817e-22	2.32883e-21	0.398758	5.54216e-21	6.17416e-20	1.68833e-20	1.1913e-19	3.48491e-21	3.14305e-26	7.36081e-25	9.63006e-19	5.40989e-27	3.85952e-29	0.307192	3.63712e-26	6.01039e-28	1.44624e-31	3.38621e-24	3.14106e-26	1.14662e-33
12687	Mean arterial pressure during PWA	15248	-0.213281	9.69732e-05	0.00183024	7.44774e-05	8.37095e-06	0.506406	4.8828e-05	2.91069e-06	5.47488e-06	6.07857e-06	2.13519e-05	2.64988e-06	3.38366e-13	2.89032e-11	9.48723e-13	7.49905e-17	0.225512	9.26852e-13	5.81513e-15	3.29984e-18	2.09322e-14	2.88465e-14	2.0706e-17
12695	Blood pressure test start time	36642	0	1	1	1	1	1	1	1	1	1	1	1	1	1	1	1	1	1	1	1	1	1	1
12697	Systolic brachial blood pressure	15400	-0.297283	7.26863e-14	3.0858e-11	7.98997e-15	5.15663e-16	0.919549	5.36184e-15	1.9905e-15	4.93397e-16	1.75541e-15	7.03056e-16	1.56869e-19	1.78395e-24	1.11217e-20	5.1142e-25	1.0392e-29	0.324432	3.54931e-25	8.01224e-27	1.42364e-31	9.06674e-25	5.49185e-26	1.14536e-34
12698	Diastolic brachial blood pressure	15400	-0.0165507	0.781799	0.661322	0.978438	0.786501	0.619852	0.940264	0.410996	0.514183	0.394162	0.77451	0.776648	0.570388	0.421534	0.868605	0.17941	0.752042	0.878402	0.570433	0.175194	0.287502	0.585186	0.653275
12699	Number of PWA tests performed	15452	-0.0386363	0.456444	0.30325	0.436552	0.334705	0.817921	0.444855	0.281696	0.76199	0.576089	0.471092	0.890366	0.184336	0.0496428	0.221496	0.522847	0.422982	0.137212	0.29786	0.0892084	0.456355	0.235239	0.248113
12700	Vicorder results plausible	36753	0	1	1	1	1	1	1	1	1	1	1	1	1	1	1	1	1	1	1	1	1	1	1
12702	Cardiac index during PWA	14392	-0.388031	1.18062e-14	5.46267e-13	2.52483e-18	2.55981e-18	0.124844	2.01568e-16	2.16998e-15	1.24795e-15	9.56649e-16	1.55281e-16	1.79066e-21	2.08909e-38	1.23495e-30	1.09638e-39	9.21336e-47	7.18051e-05	4.99495e-39	2.80412e-43	1.07782e-45	2.31165e-38	1.43533e-43	2.70336e-50
12706	Eprime error flag	128	0	1	1	1	1	1	1	1	1	1	1	1	1	1	1	1	1	1	1	1	1	1	1
20001	Cancer code, self-reported	52467	0	1	1	1	1	1	1	1	1	1	1	1	1	1	1	1	1	1	1	1	1	1	1
20002	Non-cancer illness code, self-reported	1104856	0	1	1	1	1	1	1	1	1	1	1	1	1	1	1	1	1	1	1	1	1	1	1
20003	Treatment/medication code	1368474	0	1	1	1	1	1	1	1	1	1	1	1	1	1	1	1	1	1	1	1	1	1	1
20004	Operation code	981722	0	1	1	1	1	1	1	1	1	1	1	1	1	1	1	1	1	1	1	1	1	1	1
20005	Email access	135349	-0.145939	0.0458219	0.188943	0.0612728	0.195482	0.0421836	0.0350473	0.0452607	0.00209088	0.0415649	0.0272886	0.000853249	0.000185404	0.00612475	7.21026e-05	0.00120603	3.00237e-06	0.000179498	0.000194304	0.000726389	0.000301114	0.000104501	6.88934e-08
20006	Interpolated Year when cancer first diagnosed	21412	0.133743	4.70164e-08	2.72473e-07	7.64374e-10	4.35231e-05	9.25207e-08	3.47532e-10	3.93176e-07	2.61644e-12	2.34354e-09	1.3869e-07	0.406391	7.61658e-07	0.000113721	3.07493e-06	4.66954e-07	1.30681e-06	1.63086e-10	8.58661e-08	5.37029e-08	1.81981e-06	5.54836e-07	0.0554996
20007	Interpolated Age of participant when cancer first diagnosed	21412	0.253183	6.50524e-12	2.13084e-09	4.74636e-14	6.20242e-10	1.88841e-12	2.46529e-13	3.71067e-11	2.92906e-16	6.42284e-15	1.09178e-11	0.00917913	7.39388e-21	1.4971e-13	9.5385e-21	2.68139e-22	4.04467e-23	1.04493e-23	4.74188e-18	1.09802e-21	8.07205e-20	3.25725e-22	1.35903e-12
20008	Interpolated Year when non-cancer illness first diagnosed	159453	-0.0861573	9.44648e-36	7.5615e-53	9.62269e-44	1.67358e-47	0.00116018	7.25272e-39	2.5271e-40	3.10532e-39	8.3011e-49	1.07827e-40	2.81685e-46	9.38734e-19	1.58732e-20	4.68047e-22	9.88916e-31	0.0373583	6.24921e-22	6.68666e-13	9.86619e-26	7.53259e-29	3.3429e-21	5.66248e-28
20009	Interpolated Age of participant when non-cancer illness first diagnosed	159453	-0.0559252	1.00355e-28	5.27723e-46	8.68782e-34	6.88251e-37	0.00830327	2.1158e-30	2.56538e-31	4.72977e-34	8.68999e-40	4.21908e-31	5.5713e-31	9.51844e-09	7.48523e-13	2.22271e-10	4.86254e-13	0.383258	3.57706e-11	2.60617e-06	6.00824e-14	8.11875e-20	1.25224e-09	2.43363e-11
20010	Interpolated Year when operation took place	176848	-0.137107	1.17262e-79	1.54431e-91	2.52684e-86	4.41489e-77	1.24033e-75	2.92524e-72	1.09719e-81	6.99641e-66	4.4803e-93	4.95062e-87	2.30604e-56	3.78865e-51	7.47686e-59	3.50931e-55	8.38521e-57	8.96953e-63	7.63938e-49	9.21544e-55	1.40477e-56	4.59566e-63	3.60632e-59	2.37382e-26
20011	Interpolated Age of participant when operation took place	176848	-0.102881	5.14089e-68	1.42101e-79	2.55746e-73	1.08648e-64	1.67041e-63	8.72708e-61	3.14685e-69	1.82107e-59	3.25309e-80	5.19656e-73	4.50924e-50	1.52223e-29	2.84484e-38	4.3089e-32	7.67401e-31	1.63272e-36	1.90546e-28	2.21061e-34	1.54641e-35	4.42004e-40	5.98926e-34	2.59395e-14
20012	Method of recording time when cancer first diagnosed	21460	-0.15832	0.787123	0.600532	0.928443	0.201398	0.62214	0.800566	0.750111	0.438671	0.776791	0.779274	0.742969	0.779108	0.895425	0.546673	0.911271	0.584982	0.653979	0.773172	0.699273	0.719479	0.793698	0.903478
20013	Method of recording time when non-cancer illness first diagnosed	161982	0.96949	1.34958e-72	1.571e-77	2.13177e-73	3.93618e-74	6.46093e-27	7.1724e-74	1.84273e-70	1.86905e-71	1.79272e-71	1.41609e-73	1.99298e-138	3.07232e-98	1.46129e-125	6.29744e-96	8.66975e-101	9.11219e-29	9.65403e-97	6.84677e-96	1.38182e-93	2.55349e-108	1.48971e-99	3.38157e-171
20014	Method of recording time when operation occurred	177421	0.696344	7.21849e-07	1.09845e-06	9.85212e-06	6.5372e-07	1.35966e-09	1.84209e-06	2.46567e-06	0.000158434	1.62711e-07	1.77012e-06	1.41837e-06	6.00042e-12	1.0019e-10	7.79843e-11	2.66504e-11	4.76699e-12	7.91333e-13	1.10667e-12	1.54098e-09	1.141e-12	1.9834e-12	1.2302e-10
20015	Sitting height	215596	0.757986	1e-255	1e-255	1e-255	1e-255	1e-255	1e-255	1e-255	1e-255	1e-255	1e-255	1e-255	1e-255	1e-255	1e-255	1e-255	1e-255	1e-255	1e-255	1e-255	1e-255	1e-255	1e-255
20016	Fluid intelligence score	67796	0.510448	1.78923e-231	4.7949e-256	7.97572e-240	5.41447e-234	1.08535e-246	1.88455e-235	3.38406e-236	1.18184e-56	1.12927e-244	1.47012e-240	1e-255	8.1173e-273	1.84805e-257	5.79633e-278	1.95992e-290	1e-255	1.86274e-288	1.05752e-286	1.73014e-92	1.11277e-284	7.9013e-290	1e-255
20018	Prospective memory result	69146	1.20256	6.40076e-52	1.41722e-50	1.39323e-48	1.39959e-52	2.09879e-55	3.08624e-53	1.91747e-54	4.15333e-22	7.16117e-56	1.91606e-55	7.77155e-66	2.12258e-52	1.57151e-47	1.12766e-52	1.71987e-55	1.86291e-65	1.19135e-55	4.6139e-56	5.24911e-19	5.38274e-53	8.87089e-56	7.88302e-62
20019	Speech-reception-threshold (SRT) estimate (left)	66332	-0.220983	5.11596e-37	8.43903e-30	1.22396e-34	5.37781e-39	5.88713e-43	2.04086e-36	2.70942e-39	3.09887e-21	1.57184e-37	5.7121e-39	1.68077e-46	3.52487e-51	3.07134e-39	6.98201e-48	7.12818e-51	5.28827e-60	7.28391e-52	4.51005e-50	2.60679e-29	1.29694e-57	6.39677e-50	3.72328e-53
20021	Speech-reception-threshold (SRT) estimate (right)	66273	-0.204929	1.2472e-44	1.4737e-35	8.01728e-42	2.79779e-43	1.58754e-49	2.61719e-44	1.32163e-48	1.04818e-25	2.70878e-44	1.01319e-45	2.51122e-56	2.49736e-44	1.20856e-30	7.46353e-42	3.80226e-46	1.2377e-53	1.4346e-44	1.05344e-43	3.4389e-23	2.6062e-50	6.75827e-46	2.36436e-44
20022	Birth weight	138575	0.360627	1.22203e-99	5.055e-98	2.73804e-119	3.94373e-87	3.2763e-87	1.29338e-99	2.21363e-110	7.49861e-103	2.37142e-107	3.30714e-96	2.65366e-107	3.05437e-278	1e-255	5.3138e-290	5.09586e-231	3.94499e-243	1.09839e-294	1.44362e-272	1.58282e-288	1.47745e-290	1e-255	2.58862e-308
20023	Mean time to correctly identify matches	214662	-0.900227	1e-255	1e-255	1e-255	1e-255	1e-255	1e-255	1e-255	1.98723e-140	1e-255	1e-255	1e-255	1e-255	1e-255	1e-255	1e-255	1e-255	1e-255	1e-255	6.44293e-142	1e-255	1e-255	1e-255
20024	Job code - deduced	14552	0	1	1	1	1	1	1	1	1	1	1	1	1	1	1	1	1	1	1	1	1	1	1
20025	Time saliva sample collected	0	0	1	1	1	1	1	1	1	1	1	1	1	1	1	1	1	1	1	1	1	1	1	1
20031	Acceptability of each blow result (text)	597486	0	1	1	1	1	1	1	1	1	1	1	1	1	1	1	1	1	1	1	1	1	1	1
20032	Acceptability of each blow result (text) (pilot)	6507	0	1	1	1	1	1	1	1	1	1	1	1	1	1	1	1	1	1	1	1	1	1	1
20035	Time urine sample collected	0	0	1	1	1	1	1	1	1	1	1	1	1	1	1	1	1	1	1	1	1	1	1	1
20041	Reason for skipping weight	1044	0	1	1	1	1	1	1	1	1	1	1	1	1	1	1	1	1	1	1	1	1	1	1
20042	Reason for skipping spirometry	2013	0	1	1	1	1	1	1	1	1	1	1	1	1	1	1	1	1	1	1	1	1	1	1
20043	Reason for skipping grip strength (right)	1628	0	1	1	1	1	1	1	1	1	1	1	1	1	1	1	1	1	1	1	1	1	1	1
20044	Reason for skipping grip strength (left)	1695	0	1	1	1	1	1	1	1	1	1	1	1	1	1	1	1	1	1	1	1	1	1	1
20045	Reason for skipping waist	445	0	1	1	1	1	1	1	1	1	1	1	1	1	1	1	1	1	1	1	1	1	1	1
20046	Reason for skipping hip measurement	504	0	1	1	1	1	1	1	1	1	1	1	1	1	1	1	1	1	1	1	1	1	1	1
20047	Reason for skipping standing height	824	0	1	1	1	1	1	1	1	1	1	1	1	1	1	1	1	1	1	1	1	1	1	1
20048	Reason for skipping sitting height	843	0	1	1	1	1	1	1	1	1	1	1	1	1	1	1	1	1	1	1	1	1	1	1
20049	Blood sample #, note contents	34926	0	1	1	1	1	1	1	1	1	1	1	1	1	1	1	1	1	1	1	1	1	1	1
20050	Reason blood sampling not attempted	1583	0	1	1	1	1	1	1	1	1	1	1	1	1	1	1	1	1	1	1	1	1	1	1
20051	Reason for skipping arterial stiffness	598	4.4793	0.137714	0.160475	0.152395	0.112404	0.128502	0.10096	0.0822407	0.0741482	0.151386	0.262353	0.37055	0.269114	0.196711	0.248434	0.557314	0.270358	0.330133	0.445642	0.187059	0.262751	0.308472	0.161066
20052	Reason for skipping refractometry (left)	1520	0	1	1	1	1	1	1	1	1	1	1	1	1	1	1	1	1	1	1	1	1	1	1
20053	Reason for skipping IOP (right)	2403	0	1	1	1	1	1	1	1	1	1	1	1	1	1	1	1	1	1	1	1	1	1	1
20054	Reason for skipping IOP (left)	2596	0	1	1	1	1	1	1	1	1	1	1	1	1	1	1	1	1	1	1	1	1	1	1
20055	Reason for skipping refractometry (right)	1399	0	1	1	1	1	1	1	1	1	1	1	1	1	1	1	1	1	1	1	1	1	1	1
20056	Reason for skipping visual acuity (right)	410	0	1	1	1	1	1	1	1	1	1	1	1	1	1	1	1	1	1	1	1	1	1	1
20057	Reason for skipping visual acuity (left)	449	0	1	1	1	1	1	1	1	1	1	1	1	1	1	1	1	1	1	1	1	1	1	1
20058	Reason for skipping ECG	358	0	1	1	1	1	1	1	1	1	1	1	1	1	1	1	1	1	1	1	1	1	1	1
20059	Reason ECG not completed	262	0	1	1	1	1	1	1	1	1	1	1	1	1	1	1	1	1	1	1	1	1	1	1
20060	Reason at-rest ECG performed without bicycle	518	2.01053	0.00202907	0.000193273	0.00910281	0.0117348	0.000511214	0.00505259	0.00184044	0.041659	0.00266652	0.00201331	0.00724613	0.00133197	0.00739093	0.00121823	0.00141143	0.00447764	0.00281673	0.00140461	0.000419898	0.000712138	0.000654432	0.000326026
20061	Reason for skipping OCT (right)	3164	0	1	1	1	1	1	1	1	1	1	1	1	1	1	1	1	1	1	1	1	1	1	1
20062	Reason for skipping OCT (left)	3360	0	1	1	1	1	1	1	1	1	1	1	1	1	1	1	1	1	1	1	1	1	1	1
20071	Reason no saliva sample collected	189	-9.75579	0.0730848	0.0468893	0.153671	0.0962976	0.0547848	0.123902	0.133923	0.0315536	0.197403	0.181533	0.0185152	0.0243	0.0277233	0.0171525	0.108988	0.00535566	0.0164743	0.0115035	0.0398977	0.0647578	0.017956	0.0907065
20072	Reason no urine sample collected	1059	-4.93713	0.00193243	0.0113307	0.000796673	0.00321782	0.00202173	0.0029726	0.00137016	0.0124144	0.00269941	0.00196944	0.000124554	1.15846e-08	3.65965e-08	3.03569e-09	0.000266799	6.97738e-07	3.72462e-08	2.63871e-08	4.17576e-10	9.90634e-09	1.73653e-08	2.89326e-07
20074	Home location at assessment - east co-ordinate (rounded)	214136	-0.0331465	8.98711e-10	0.00107494	0.1066	3.42079e-08	2.60388e-20	2.39703e-10	9.35981e-10	2.1693e-08	7.74261e-08	3.09688e-16	6.40373e-10	5.73552e-05	0.215748	0.961006	0.0144398	3.68418e-26	7.89737e-07	0.0369434	0.176093	3.68982e-05	1.00976e-06	5.03351e-07
20075	Home location at assessment - north co-ordinate (rounded)	214136	0.135514	2.17388e-142	3.12541e-83	1.39982e-59	1.6648e-142	5.97535e-180	1.22466e-149	1.50401e-133	5.52336e-177	5.03326e-135	1.05981e-168	2.98138e-42	7.84784e-61	3.84768e-10	3.47062e-32	1.42134e-62	5.16104e-88	1.28376e-76	2.01663e-47	4.30816e-47	4.53628e-71	9.75516e-79	9.94415e-12
20077	Number of diet questionnaires completed	93074	0.114413	6.93784e-07	0.000431912	4.8097e-06	1.46354e-05	8.08736e-11	2.66858e-07	1.67071e-07	3.18635e-05	1.62254e-08	1.61543e-07	1.92468e-10	2.08089e-21	3.11329e-11	7.03455e-23	4.03325e-23	1.56619e-35	1.56553e-24	1.65212e-19	1.07796e-15	3.80458e-21	7.79808e-24	4.48927e-29
20078	When diet questionnaire completion requested	458610	0	1	1	1	1	1	1	1	1	1	1	1	1	1	1	1	1	1	1	1	1	1	1
20079	Day-of-week questionnaire completion requested	30087	0.17726	0.0219698	0.0680036	0.0104222	0.0252965	0.0149391	0.0215492	0.0324255	0.0343339	0.0264455	0.00777622	0.0182947	0.0185418	0.0583188	0.0312711	0.00873955	0.051666	0.0516108	0.00646862	0.0247555	0.101853	0.02432	0.000584233
20080	Day-of-week questionnaire completed	30087	0.17726	0.0219698	0.0680036	0.0104222	0.0252965	0.0149391	0.0215492	0.0324255	0.0343339	0.0264455	0.00777622	0.0182947	0.0185418	0.0583188	0.0312711	0.00873955	0.051666	0.0516108	0.00646862	0.0247555	0.101853	0.02432	0.000584233
20081	Hour-of-day questionnaire completed	30087	-0.0169699	1.26752e-07	5.78496e-12	0.00259211	7.26538e-13	2.87024e-06	6.4179e-09	6.51722e-13	6.81947e-07	4.58677e-05	4.27943e-07	4.99249e-08	0.428167	1.2996e-06	0.894761	0.932492	0.292964	4.40958e-06	0.540772	0.834135	0.37155	0.950462	0.22412
20082	Duration of questionnaire	30087	-0.266995	6.23086e-39	1.80006e-52	4.30857e-38	1.10061e-41	6.23954e-39	3.92695e-38	1.23927e-42	1.39784e-06	1.2645e-41	6.20647e-38	1.0146e-43	9.33818e-36	1.38023e-54	1.42902e-32	2.13376e-34	8.68065e-36	5.75954e-33	4.75513e-36	2.13668e-07	1.91841e-36	7.98778e-34	9.97596e-41
20083	Delay between questionnaire request and completion	30087	0	1	1	1	1	1	1	1	1	1	1	1	1	1	1	1	1	1	1	1	1	1	1
20084	Vitamin and/or mineral supplement use	451443	0	1	1	1	1	1	1	1	1	1	1	1	1	1	1	1	1	1	1	1	1	1	1
20085	Reason for not eating or drinking normally	5887	-1.13193	0.256043	0.136884	0.369155	0.346096	0.427354	0.33245	0.333808	0.263226	0.419303	0.311009	0.0301082	2.0869e-05	0.0010297	1.44374e-05	6.0015e-05	2.25573e-05	3.30163e-07	5.85511e-05	0.00027903	0.000637543	7.76294e-06	4.3194e-05
20086	Type of special diet followed	8159	-0.640939	0.0263148	0.00543879	0.0454936	0.00273365	0.0380943	0.0204995	0.0262176	0.151305	0.125692	0.00513084	0.00878858	1.86065e-06	6.12826e-08	2.02235e-05	7.47889e-06	1.77411e-06	6.61201e-06	0.000577092	2.7452e-08	2.45563e-05	1.2086e-05	2.56719e-05
20087	Types of spread used on bread/crackers	617067	0	1	1	1	1	1	1	1	1	1	1	1	1	1	1	1	1	1	1	1	1	1	1
20088	Types of spreads/sauces consumed	443444	0	1	1	1	1	1	1	1	1	1	1	1	1	1	1	1	1	1	1	1	1	1	1
20089	Type of meals eaten	28682	0.262594	0.0201657	0.022577	0.0220429	0.00410881	0.023874	0.0164999	0.0201389	0.0867735	0.00737148	0.0279919	0.00018933	0.0667903	0.0975579	0.0594712	0.00975348	0.034929	0.0270617	0.0974342	0.0746808	0.029581	0.0617052	0.021427
20090	Type of fat/oil used in cooking	594827	0	1	1	1	1	1	1	1	1	1	1	1	1	1	1	1	1	1	1	1	1	1	1
20091	Type of sliced bread eaten	17630	0.308237	0.00103931	0.0147774	0.00244605	0.00154648	0.00241272	0.00204795	0.000618422	0.00203099	0.000541279	0.000506784	8.34885e-08	2.93559e-05	0.0113267	1.01288e-05	8.36362e-08	4.45723e-06	3.62242e-07	0.000143614	2.12051e-05	2.77587e-05	2.54829e-05	4.67003e-09
20092	Type of baguette eaten	2346	0.317569	0.480434	0.150127	0.412829	0.520573	0.41603	0.237422	0.445646	0.198437	0.367267	0.355423	0.197315	0.642403	0.616574	0.544456	0.237387	0.354321	0.749569	0.441633	0.657038	0.455338	0.638418	0.32876
20093	Type of large bap eaten	848	0.396388	0.310609	0.198612	0.40116	0.387761	0.379157	0.282065	0.324623	0.499147	0.232782	0.340425	0.503683	0.159816	0.476616	0.120169	0.0734004	0.0835577	0.110075	0.162258	0.0348533	0.268343	0.183786	0.0992755
20094	Type of bread roll eaten	3961	0.893627	0.0744441	0.0594038	0.0607216	0.0444491	0.0315395	0.0487179	0.0800414	0.0799987	0.0585341	0.0480685	0.061035	0.0971618	0.0852027	0.0836634	0.137766	0.0491269	0.067942	0.0640674	0.085149	0.132526	0.0844784	0.108797
20095	Size of white wine glass drunk	4667	0.0816561	0.306155	0.111645	0.233804	0.39927	0.146243	0.353059	0.424596	0.249674	0.468292	0.304635	0.390918	0.452907	0.397966	0.507346	0.663494	0.1035	0.563322	0.283263	0.847555	0.286488	0.364651	0.648391
20096	Size of red wine glass drunk	4416	-0.0792178	0.378343	0.514945	0.189478	0.310401	0.196235	0.333988	0.66341	0.394931	0.335689	0.492129	0.367202	0.720755	0.302174	0.651769	0.537256	0.776962	0.921209	0.902857	0.428328	0.561139	0.717497	0.577073
20097	Size of rose wine glass drunk	1080	0.483459	0.15984	0.148591	0.130324	0.258222	0.215718	0.137762	0.201238	0.144547	0.138022	0.154484	0.329175	0.0346209	0.021887	0.0356632	0.0339676	0.0286176	0.0634118	0.0433893	0.0709381	0.0418924	0.0268496	0.0542351
20098	Thickness of butter/margarine spread on sliced bread	10813	0.368635	0.235731	0.390748	0.467174	0.514571	0.161339	0.323046	0.214364	0.05789	0.392519	0.18773	0.0845646	0.0579584	0.0177538	0.0510076	0.0342483	0.336863	0.219394	0.0243637	0.321059	0.0114592	0.0713075	0.0717487
20099	Thickness of butter/margarine spread on baguettes	1049	0.241294	0.14435	0.101793	0.14446	0.219653	0.143748	0.169384	0.0943834	0.117469	0.0813344	0.0854564	0.303176	0.318766	0.290031	0.273927	0.319036	0.43915	0.213699	0.344557	0.37729	0.0804151	0.260653	0.483336
20100	Thickness of butter/margarine spread on large baps	255	-0.686042	0.360972	0.207245	0.275829	0.428703	0.31938	0.408695	0.198108	0.573395	0.400779	0.264502	0.379298	0.60998	0.81252	0.653261	0.634346	0.85127	0.786754	0.519171	0.631691	0.627756	0.623446	0.503158
20101	Thickness of butter/margarine spread on bread rolls	2047	0.252841	0.289388	0.181336	0.190664	0.265107	0.187682	0.334352	0.212848	0.392283	0.32406	0.427732	0.288313	0.56901	0.382513	0.406916	0.236509	0.864249	0.58454	0.460778	0.897213	0.254289	0.595244	0.84496
20102	Thickness of butter/margarine spread on crackers/crispbreads	1172	0.320015	0.232673	0.159088	0.142771	0.350057	0.4249	0.270769	0.256006	0.405233	0.129971	0.357278	0.396399	0.173724	0.0541396	0.114242	0.13366	0.375607	0.240211	0.0842995	0.643515	0.140738	0.14762	0.161174
20103	Thickness of butter/margarine spread on oatcakes	179	-0.79659	0.266716	0.271944	0.208019	0.348918	0.340239	0.320051	0.24049	0.129584	0.157452	0.366973	0.522957	0.59977	0.424331	0.525317	0.444701	0.338628	0.773841	0.494473	0.345542	0.687356	0.596183	0.820448
20104	Thickness of butter/margarine spread on other bread	595	0.331625	0.0505415	0.112518	0.0304233	0.056036	0.0730998	0.0627959	0.0883913	0.0407888	0.0310336	0.0702752	0.105516	0.32332	0.327977	0.290824	0.275938	0.170456	0.458067	0.18028	0.531765	0.131977	0.317076	0.346426
20105	Liquid used to make porridge	4852	-0.243232	0.0738331	0.0136617	0.0699014	0.0245393	0.0628566	0.0456872	0.079394	0.359046	0.216721	0.165526	0.270084	0.0216298	0.0494502	0.0125732	0.309786	0.146298	0.0291716	0.027722	0.00120213	0.012587	0.0141373	0.00194622
20106	Type of yogurt eaten	9876	0.257873	0.00121636	0.00044443	0.000518489	0.00224756	0.023134	0.00046131	0.00225485	0.0244043	0.000628867	0.000196452	0.000125824	0.0112311	0.00832144	0.00161175	0.0462792	0.104395	0.0043922	0.013059	0.0307674	0.00418168	0.00660648	0.00339453
20107	Illnesses of father	1230767	0	1	1	1	1	1	1	1	1	1	1	1	1	1	1	1	1	1	1	1	1	1	1
20108	Ingredients in canned soup	1313	0.694694	0.0762625	0.0412988	0.146063	0.050519	0.0826058	0.101192	0.0611397	0.0763283	0.132519	0.133718	0.136106	0.499522	0.681041	0.470075	0.46263	0.336728	0.694184	0.578534	0.333962	0.565653	0.567106	0.285049
20109	Ingredients in homemade soup	2030	-1.38489	0.217791	0.402391	0.406525	0.3142	0.207851	0.130498	0.240995	0.153784	0.274254	0.275293	0.499919	0.12062	0.289983	0.124401	0.17364	0.225835	0.195982	0.126079	0.0520232	0.103138	0.113783	0.133685
20110	Illnesses of mother	1239806	0	1	1	1	1	1	1	1	1	1	1	1	1	1	1	1	1	1	1	1	1	1	1
20111	Illnesses of siblings	1044378	0	1	1	1	1	1	1	1	1	1	1	1	1	1	1	1	1	1	1	1	1	1	1
20112	Illnesses of adopted father	12417	0	1	1	1	1	1	1	1	1	1	1	1	1	1	1	1	1	1	1	1	1	1	1
20113	Illnesses of adopted mother	13367	0	1	1	1	1	1	1	1	1	1	1	1	1	1	1	1	1	1	1	1	1	1	1
20114	Illnesses of adopted siblings	8704	0	1	1	1	1	1	1	1	1	1	1	1	1	1	1	1	1	1	1	1	1	1	1
20115	Country of Birth (non-UK origin)	40579	0	1	1	1	1	1	1	1	1	1	1	1	1	1	1	1	1	1	1	1	1	1	1
20116	Smoking status	215945	0.859151	4.61026e-05	0.000334298	0.000406907	2.48516e-05	2.28713e-05	6.08532e-06	2.89184e-05	2.46673e-06	3.73384e-05	8.24342e-06	9.54352e-08	6.40827e-10	1.49118e-09	5.47422e-09	4.50626e-11	6.4827e-13	3.83756e-11	1.91879e-09	1.09805e-07	4.03458e-10	2.94601e-10	5.45509e-11
20117	Alcohol drinker status	215945	0.889735	0.00125099	0.0202288	0.000580486	0.000304625	0.000967216	0.0019328	0.000468523	1.99018e-05	0.000617031	0.000159494	8.09735e-07	0.0014483	4.4329e-05	0.00364734	0.000280924	0.000418577	0.00354932	0.00256281	0.000216761	0.00623002	0.00196684	0.000144569
20118	Home area population density - urban or rural	497469	0	1	1	1	1	1	1	1	1	1	1	1	1	1	1	1	1	1	1	1	1	1	1
20119	Current employment status - corrected	1545	-4.49054	0.00164459	0.00232991	0.000449552	0.000225891	0.000662248	0.00222622	0.00229857	0.0128497	0.00825655	0.00153825	0.0278224	0.297244	0.330199	0.367031	0.175902	0.309164	0.205176	0.509035	0.50155	0.200671	0.293343	0.330988
20121	Cascot confidence score	6510	-0.0661414	0.731021	0.661823	0.642659	0.975866	0.544185	0.767468	0.621036	0.948084	0.820463	0.651083	0.628791	0.152435	0.125295	0.199952	0.252578	0.278302	0.388666	0.186199	0.138579	0.0973669	0.167165	0.156642
20122	Bipolar disorder status	516	-0.349524	0.886668	0.91036	0.735491	0.707029	0.569311	0.820805	0.815243	0.908781	0.690961	0.660002	0.799825	0.358281	0.576722	0.428201	0.418081	0.587377	0.432283	0.652514	0.199279	0.381927	0.366466	0.151318
20123	Single episode of probable major depression	9754	0	1	1	1	1	1	1	1	1	1	1	1	1	1	1	1	1	1	1	1	1	1	1
20124	Probable recurrent major depression (moderate)	15245	0	1	1	1	1	1	1	1	1	1	1	1	1	1	1	1	1	1	1	1	1	1	1
20125	Probable recurrent major depression (severe)	9400	0	1	1	1	1	1	1	1	1	1	1	1	1	1	1	1	1	1	1	1	1	1	1
20126	Bipolar and major depression status	49523	0.365563	3.64996e-13	1.81539e-10	4.35711e-12	5.12828e-16	4.49584e-10	3.24992e-13	1.58746e-12	0.00168272	1.20386e-12	2.17467e-12	1.71205e-19	6.20197e-15	1.41395e-18	4.87423e-13	1.29478e-14	2.40243e-08	1.84273e-15	2.36756e-16	0.00343838	2.52756e-17	4.45457e-13	2.12158e-18
20127	Neuroticism score	172897	0.181067	1.07986e-281	1.33484e-299	3.12583e-277	1.58293e-303	6.92741e-303	1.45395e-289	2.92628e-286	9.17007e-07	1.28321e-290	6.85892e-273	6.85892e-273	5.37833e-88	5.26031e-128	7.7142e-92	2.19002e-93	4.31447e-112	2.22047e-101	6.91127e-90	8.74166e-05	2.24882e-97	5.96211e-74	7.7615e-107
20128	Number of fluid intelligence questions attempted within time limit	67796	0.255442	9.81041e-115	2.3801e-139	6.01934e-123	5.23023e-112	3.72012e-127	1.17136e-118	1.6414e-120	8.47713e-11	7.40137e-123	4.62295e-114	6.10296e-145	2.47339e-69	1.73626e-88	3.27563e-70	4.92822e-74	1.01388e-91	1.2724e-69	1.39409e-76	0.00031695	2.77506e-73	1.077e-67	1.00605e-81
20129	Number of columns displayed in round	54138	0.0589669	0.447442	0.381153	0.432125	0.402158	0.284848	0.510026	0.240778	0.663513	0.313628	0.536566	0.16445	0.000134897	0.00285573	0.000128193	3.87617e-05	0.000109774	4.92874e-05	9.05247e-06	0.0556706	0.000395204	0.000134882	0.000102981
20130	Number of rows displayed in round	54138	0.0589669	0.447442	0.381153	0.432125	0.402158	0.284848	0.510026	0.240778	0.663513	0.313628	0.536566	0.16445	0.000134897	0.00285573	0.000128193	3.87617e-05	0.000109774	4.92874e-05	9.05247e-06	0.0556706	0.000395204	0.000134882	0.000102981
20131	Number of correct matches in round	54138	0.0493191	0.0625364	0.0924723	0.0533093	0.0454495	0.0343049	0.049717	0.0392008	0.741796	0.0533661	0.0525598	0.00540362	0.00140945	0.00821345	0.0010632	0.00221041	0.000709667	0.000781747	0.000380515	0.0752898	0.0136136	0.0034	0.000452197
20132	Number of incorrect matches in round	54138	-0.0555341	4.04209e-09	6.13198e-11	2.14023e-10	2.47772e-09	5.68235e-08	5.02382e-09	6.54174e-10	6.39099e-05	3.1968e-09	1.35479e-08	1.87342e-09	0.00032429	0.000667486	0.00073172	5.22496e-06	5.7161e-07	0.000108862	0.000299231	0.283322	0.000221626	0.00042644	4.6383e-05
20133	Time to complete round	52929	-0.12005	1.16184e-35	5.13429e-37	1.50666e-41	6.28277e-39	5.19716e-39	1.2655e-36	6.27817e-39	4.43756e-10	2.36541e-34	1.41753e-34	5.34641e-45	1.42305e-14	8.40009e-12	5.17295e-14	1.04465e-19	2.04017e-22	8.78372e-16	1.12069e-15	0.463157	1.24841e-14	4.00752e-13	3.43648e-19
20134	When pairs test completed	0	0	1	1	1	1	1	1	1	1	1	1	1	1	1	1	1	1	1	1	1	1	1	1
20135	When fluid intelligence test completed	0	0	1	1	1	1	1	1	1	1	1	1	1	1	1	1	1	1	1	1	1	1	1	1
20136	When trail making test completed	0	0	1	1	1	1	1	1	1	1	1	1	1	1	1	1	1	1	1	1	1	1	1	1
20137	When symbol digit substitution test completed	0	0	1	1	1	1	1	1	1	1	1	1	1	1	1	1	1	1	1	1	1	1	1	1
20138	When numeric memory test completed	0	0	1	1	1	1	1	1	1	1	1	1	1	1	1	1	1	1	1	1	1	1	1	1
20147	Errors before selecting correct item in numeric path (trail #1)	12926	-0.0173167	0.714922	0.924264	0.455098	0.601044	0.713204	0.781912	0.423063	0.820239	0.605385	0.755317	0.865888	0.586026	0.762538	0.723178	0.370708	0.298346	0.685702	0.569889	0.745248	0.47148	0.466165	0.397619
20148	Errors before selecting correct item in alphanumeric path (trail #2)	19971	-0.0501506	0.0201905	0.0200881	0.0369545	0.0246646	0.0278035	0.0117243	0.0167175	0.0544687	0.0361899	0.0162071	0.00464983	0.0513769	0.0370806	0.0569149	0.216952	0.0228022	0.0690304	0.0695114	0.101169	0.0492948	0.0589918	0.0601479
20149	Interval between previous point and current one in numeric path (trail #1)	52406	-0.11429	1.46001e-18	2.21212e-18	9.20214e-20	2.19227e-20	5.74742e-20	6.2955e-19	9.43864e-19	1.46975e-07	1.34638e-18	6.46848e-20	2.74679e-27	3.16525e-13	1.07508e-11	4.64536e-13	3.26698e-16	1.43403e-15	2.6131e-14	2.02011e-12	2.49312e-05	8.8163e-14	1.06023e-12	2.04156e-14
20150	Forced expiratory volume in 1-second (FEV1), Best measure	161555	1.29834	1e-255	1e-255	1e-255	1e-255	1e-255	1e-255	1e-255	1e-255	1e-255	1e-255	1e-255	1e-255	1e-255	1e-255	1e-255	1e-255	1e-255	1e-255	1e-255	1e-255	1e-255	1e-255
20151	Forced vital capacity (FVC), Best measure	161555	1.21438	1e-255	1e-255	1e-255	1e-255	1e-255	1e-255	1e-255	1e-255	1e-255	1e-255	1e-255	1e-255	1e-255	1e-255	1e-255	1e-255	1e-255	1e-255	1e-255	1e-255	1e-255	1e-255
20152	Reproduciblity of spirometry measurement using ERS/ATS criteria	353323	0	1	1	1	1	1	1	1	1	1	1	1	1	1	1	1	1	1	1	1	1	1	1
20153	Forced expiratory volume in 1-second (FEV1), predicted	75972	0.391135	4.0496e-178	8.32428e-143	4.96983e-194	3.23376e-188	1.95662e-189	1.78716e-187	1.56963e-182	1.75706e-209	2.50797e-196	3.08041e-212	1.18007e-199	7.77357e-182	3.81362e-168	7.43633e-183	2.83331e-198	6.03016e-202	9.00653e-179	8.05155e-204	4.91358e-196	4.64244e-195	3.53219e-239	9.58673e-203
20154	Forced expiratory volume in 1-second (FEV1), predicted percentage	75972	1.3518	1e-255	3.64579e-135	1e-255	1e-255	1e-255	1e-255	1e-255	1e-255	1e-255	1e-255	1e-255	1e-255	6.40795e-204	1e-255	1e-255	1e-255	1e-255	1e-255	1e-255	1e-255	1e-255	1e-255
20155	Interval between previous point and current one in alphanumeric path (trail #2)	50045	-0.069404	1.25522e-17	2.27001e-16	5.08713e-19	4.20095e-18	1.81246e-19	1.06026e-17	2.86119e-18	1.55516e-10	1.30587e-15	1.65093e-17	2.8649e-23	1.51669e-05	2.86812e-05	1.85214e-06	1.25838e-05	1.94405e-07	7.83388e-06	2.21534e-05	0.0148117	1.61583e-05	1.63614e-05	2.85447e-06
20156	Duration to complete numeric path (trail #1)	46863	-0.133104	4.68764e-36	2.65801e-35	3.52645e-40	4.02756e-39	6.45323e-41	1.06563e-35	3.59468e-37	4.1078e-15	7.50362e-37	3.98098e-37	1.21672e-47	8.28915e-16	6.60122e-15	3.61341e-16	1.37192e-19	7.72961e-19	1.91344e-16	1.20389e-15	0.000897526	6.78423e-17	1.68792e-14	8.11757e-21
20157	Duration to complete alphanumeric path (trail #2)	46863	-0.198196	6.19356e-59	1.59303e-63	2.55247e-65	1.08722e-60	5.11716e-63	9.31025e-60	2.79513e-62	6.13937e-25	9.03988e-59	2.11498e-59	9.23434e-76	3.93639e-33	1.33092e-28	2.29424e-34	8.50757e-40	2.65792e-40	1.92782e-35	3.71164e-35	1.32964e-10	1.3533e-36	4.67986e-32	1.57407e-39
20158	DXA images	32138	0	1	1	1	1	1	1	1	1	1	1	1	1	1	1	1	1	1	1	1	1	1	1
20159	Number of symbol digit matches made correctly	54096	0.206574	4.60402e-45	4.47198e-51	1.52011e-44	6.05154e-49	4.6313e-53	4.15863e-46	1.12761e-48	3.63375e-16	6.75416e-44	1.74349e-47	2.19657e-60	7.68145e-41	2.30264e-38	3.26922e-41	2.36212e-49	5.11875e-49	9.10546e-44	3.88163e-41	1.7287e-11	2.57337e-40	1.76592e-38	5.22995e-48
20160	Ever smoked	563469	0	1	1	1	1	1	1	1	1	1	1	1	1	1	1	1	1	1	1	1	1	1	1
20161	Pack years of smoking	58240	-0.526145	5.21066e-148	6.41748e-81	3.98853e-142	8.27408e-158	2.70341e-139	4.6734e-151	1.63297e-144	4.11497e-210	1.96816e-158	1.66266e-169	2.8265e-189	5.26006e-226	2.61953e-142	2.29177e-218	1.11676e-235	1.52714e-232	2.65079e-283	7.96398e-197	2.87859e-288	1.85986e-269	1.1326e-241	2.62514e-211
20162	Pack years adult smoking as proportion of life span exposed to smoking	58240	-0.561734	6.3835e-135	4.23369e-68	1.95881e-126	5.01832e-146	1.10998e-128	5.1469e-140	9.89154e-133	4.73422e-197	2.90042e-145	3.16914e-156	2.75336e-203	1.23687e-257	2.64563e-159	7.76394e-247	5.83026e-272	2.07458e-264	1e-255	2.68865e-207	1e-255	1.77091e-293	5.62619e-272	7.15229e-263
20165	FI1 : numeric addition test	56181	-0.736109	0.0795254	0.139324	0.144543	0.0625743	0.0598429	0.083282	0.0613727	0.179475	0.105562	0.0916258	0.12586	0.0407487	0.00390079	0.0309007	0.0538952	0.0878968	0.0470617	0.0760044	0.0424125	0.0183104	0.0494517	0.070073
20167	FI2 : identify largest number	56183	0.900125	0.299298	0.308995	0.226292	0.206539	0.388964	0.311214	0.392498	0.604274	0.178097	0.198135	0.309585	0.564061	0.515433	0.605642	0.55307	0.204687	0.647364	0.45153	0.651805	0.489282	0.498699	0.253961
20169	FI3 : word interpolation	56180	0.518623	6.78972e-18	4.50658e-15	1.44666e-18	1.37034e-18	2.77767e-21	5.55987e-19	1.42437e-17	1.2078e-09	1.996e-19	6.69133e-18	3.38249e-19	2.30163e-21	3.88599e-16	8.87299e-23	5.34176e-21	6.80777e-25	2.45289e-23	3.64722e-22	1.28934e-12	1.12518e-21	2.13364e-23	2.96651e-23
20171	FI4 : positional arithmetic	55908	0.286876	0.000186415	0.00323957	0.000155175	0.000227316	4.49997e-06	0.000246935	8.18756e-05	0.00258998	5.84828e-05	1.77501e-05	1.93158e-05	1.54958e-05	0.000340926	1.09917e-05	3.14768e-06	2.56752e-07	1.75014e-06	4.77659e-06	0.000244518	1.65286e-06	1.61567e-06	7.78379e-06
20173	FI5 : family relationship calculation	54975	0.181708	0.000142605	0.000973827	3.08082e-05	0.00016036	0.00246286	3.54094e-05	0.000276558	0.000400776	2.42788e-05	0.000171558	5.32651e-06	0.000942873	0.00684273	0.000409113	0.00221613	0.000857815	0.000541415	0.000365758	0.0061596	0.000350513	0.000426996	0.000362491
20175	FI6 : conditional arithmetic	49368	0.63571	0.0373095	0.0494623	0.0205079	0.0835919	0.00458532	0.0427543	0.0425016	0.173724	0.0202755	0.0291999	0.0709953	0.000745853	0.006933	0.000728981	0.000442141	2.34224e-05	0.000115235	0.000473385	0.00274927	0.000745387	0.000802204	0.00241336
20177	FI7 : synonym	40024	0.339972	1.0152e-05	1.10743e-05	4.14763e-06	1.05075e-05	2.12508e-06	6.36376e-06	1.2319e-05	0.00281964	1.13549e-05	2.0334e-05	6.62704e-07	0.000403345	0.00311037	0.000300943	3.90403e-05	0.000238807	0.000625977	0.000286978	0.000940797	0.00061279	0.000165463	0.000654603
20179	FI8 : chained arithmetic	36482	-0.51004	0.000304696	0.000112193	0.000775266	0.000616945	0.000756324	0.000919549	0.000404808	0.00456619	0.000219671	6.80482e-05	8.99896e-07	2.29601e-05	5.43647e-05	9.74947e-06	7.14117e-05	2.54108e-05	1.95946e-05	2.73653e-05	0.000627647	8.94116e-06	1.93525e-05	7.00573e-05
20181	FI9 : concept interpolation	13755	0.525604	0.000708286	0.00938646	0.000109714	0.000170099	0.000309822	0.000384971	0.000589041	0.0221028	0.000592343	0.00133859	0.000291014	0.0204267	0.0328399	0.0146768	0.00395193	0.0143797	0.0252327	0.172643	0.0562498	0.0123269	0.0162779	0.00904048
20183	FI10 : arithmetic sequence recognition	8924	0.342364	0.00062904	0.00179243	0.000527316	0.000738786	0.00105436	0.000879558	0.000254664	0.00408606	0.000819013	5.57278e-05	0.000271331	0.065406	0.193997	0.0459811	0.016398	0.0584105	0.0570677	0.0644574	0.0730951	0.0592678	0.0624807	0.0739516
20185	FI11 : antonym	3818	0.978219	0.439471	0.70837	0.49416	0.362013	0.347556	0.508144	0.670082	0.106196	0.411996	0.355103	0.535539	0.0356327	0.140081	0.0270684	0.00686887	0.0165346	0.0280499	0.0614314	0.169087	0.0670082	0.0265235	0.0478043
20187	FI12 : square sequence recognition	2459	0.594122	0.0101836	0.00370105	0.00580713	0.00520507	0.00338065	0.00438265	0.00194219	0.104291	0.0269344	0.0281028	0.00836362	0.00116235	0.0166809	0.000536767	0.000214535	0.00122722	0.000662939	0.00134041	0.00319197	0.00271253	0.000816476	0.000595634
20189	FI13 : subset inclusion logic	494	-1.42787	0.00247078	0.00248114	0.00646218	0.00456426	0.00862573	0.00314784	0.00400709	0.00509124	0.00146605	0.000283685	0.00300835	0.0144262	0.147942	0.014422	0.00148784	0.019379	0.00337491	0.0346346	0.0270216	0.00708626	0.0121594	0.0290705
20191	Fluid intelligence score	56373	0.297856	1.34047e-80	1.19385e-93	3.30965e-88	1.21202e-83	6.04206e-84	3.20093e-81	1.98918e-82	1.90727e-23	5.86798e-85	1.69454e-82	1.59562e-104	2.15031e-86	2.7576e-78	2.80662e-92	1.35152e-98	1.0861e-99	4.52251e-94	2.5609e-92	8.80252e-34	4.45669e-92	6.12072e-90	3.1953e-94
20193	FI14 : alphanumeric substitution	188	-1.91116	0.025274	0.00995816	0.0216696	0.025066	0.027457	0.0354439	0.0297299	0.00562994	0.0182951	0.0312966	0.019179	0.0317287	0.028303	0.0348721	0.0923953	0.0321311	0.0483045	0.0199064	0.0471133	0.014659	0.0289968	0.0657267
20195	Number of symbol digit matches attempted	54096	0.21017	6.91017e-49	1.51001e-55	1.90376e-48	5.75067e-53	2.52918e-57	7.14831e-50	5.18808e-53	3.49464e-16	2.33307e-48	8.25958e-52	6.32994e-65	3.23604e-42	1.79619e-40	8.64198e-43	5.83994e-51	7.30462e-52	2.42898e-45	1.1084e-43	5.34044e-10	6.06055e-42	4.66064e-39	2.3981e-50
20196	First code array presented	116650	0	1	1	1	1	1	1	1	1	1	1	1	1	1	1	1	1	1	1	1	1	1	1
20198	Test array presented	3276543	0	1	1	1	1	1	1	1	1	1	1	1	1	1	1	1	1	1	1	1	1	1	1
20200	Values wanted	54234	0.0137712	0.504399	0.755103	0.472248	0.24487	0.421387	0.434547	0.343191	0.73599	0.388573	0.56642	0.428765	0.372095	0.594068	0.579057	0.146025	0.304426	0.352595	0.413918	0.555389	0.588781	0.334538	0.241404
20201	Dixon technique for internal fat - DICOM	38929	0	1	1	1	1	1	1	1	1	1	1	1	1	1	1	1	1	1	1	1	1	1	1
20202	Pancreatic fat - DICOM	37391	0	1	1	1	1	1	1	1	1	1	1	1	1	1	1	1	1	1	1	1	1	1	1
20203	Liver images - gradient echo - DICOM	10130	0	1	1	1	1	1	1	1	1	1	1	1	1	1	1	1	1	1	1	1	1	1	1
20204	Liver Imaging - T1 ShMoLLI - DICOM	38555	0	1	1	1	1	1	1	1	1	1	1	1	1	1	1	1	1	1	1	1	1	1	1
20205	ECG datasets	37623	0	1	1	1	1	1	1	1	1	1	1	1	1	1	1	1	1	1	1	1	1	1	1
20206	Measurements of pancreas volume - DICOM	21734	0	1	1	1	1	1	1	1	1	1	1	1	1	1	1	1	1	1	1	1	1	1	1
20207	Scout images for heart MRI - DICOM	39845	0	1	1	1	1	1	1	1	1	1	1	1	1	1	1	1	1	1	1	1	1	1	1
20208	Long axis heart images - DICOM	39756	0	1	1	1	1	1	1	1	1	1	1	1	1	1	1	1	1	1	1	1	1	1	1
20209	Short axis heart images - DICOM	39593	0	1	1	1	1	1	1	1	1	1	1	1	1	1	1	1	1	1	1	1	1	1	1
20210	Aortic distensibilty images - DICOM	37914	0	1	1	1	1	1	1	1	1	1	1	1	1	1	1	1	1	1	1	1	1	1	1
20211	Cine tagging images - DICOM	37763	0	1	1	1	1	1	1	1	1	1	1	1	1	1	1	1	1	1	1	1	1	1	1
20212	Left ventricular outflow tract images - DICOM	37855	0	1	1	1	1	1	1	1	1	1	1	1	1	1	1	1	1	1	1	1	1	1	1
20213	Blood flow images - DICOM	37636	0	1	1	1	1	1	1	1	1	1	1	1	1	1	1	1	1	1	1	1	1	1	1
20214	Experimental shMOLLI sequence images - DICOM	37862	0	1	1	1	1	1	1	1	1	1	1	1	1	1	1	1	1	1	1	1	1	1	1
20219	Susceptibility weighted brain images - DICOM	35982	0	1	1	1	1	1	1	1	1	1	1	1	1	1	1	1	1	1	1	1	1	1	1
20229	Values entered	54234	0.0227433	0.610059	0.310078	0.596919	0.599315	0.569928	0.616713	0.685962	0.276612	0.643707	0.7851	0.682045	0.140461	0.10711	0.143673	0.0342984	0.0810655	0.126548	0.211271	0.241404	0.275069	0.102131	0.0461337
20230	Duration to entering value	54234	-0.200662	1.20465e-50	6.36681e-58	4.44112e-52	2.72479e-55	6.33847e-55	4.2867e-52	6.33302e-54	1.52361e-19	9.03121e-50	3.68785e-53	3.80829e-65	9.95942e-39	2.84548e-41	1.33609e-39	1.77836e-43	2.18978e-45	5.66811e-43	1.10844e-40	9.07011e-10	2.81558e-40	1.34608e-37	2.1338e-44
20240	Maximum digits remembered correctly	50792	0.186152	2.55272e-17	8.02644e-15	4.16858e-20	2.10583e-16	3.53461e-17	9.5906e-18	1.71409e-19	3.84925e-08	3.61563e-17	8.46226e-19	1.2127e-24	9.88842e-32	1.19676e-21	3.02704e-34	1.14671e-36	1.63147e-35	4.15937e-35	2.60709e-32	9.81245e-19	1.21734e-33	1.06584e-32	4.58997e-36
20242	Fluid intelligence completion status	56373	-0.247254	0.0205447	0.0111689	0.00244678	0.0276126	0.0377007	0.0427815	0.035233	0.0730426	0.0101795	0.024068	0.0132087	0.00806226	0.00451705	0.0027667	0.0141635	0.0297196	0.0181897	0.00522619	0.0252561	0.00730576	0.00406626	0.0022511
20244	Pairs matching completion status	54138	-0.134073	0.077826	0.117111	0.0597753	0.0606673	0.0650441	0.055823	0.0751142	0.879345	0.102577	0.0588213	0.0117596	0.158164	0.207694	0.129531	0.117067	0.112828	0.138312	0.135165	0.423286	0.260892	0.282509	0.0885794
20245	Symbol digit completion status	54885	-0.288133	0.614972	0.875025	0.940006	0.466321	0.768276	0.760037	0.672787	0.541531	0.552604	0.724951	0.594238	0.00860161	0.0241414	0.00460588	0.0154359	0.00439988	0.00794323	0.0158255	0.0309861	0.00359522	0.00378161	0.0094434
20246	Trail making completion status	54979	-0.377278	1.35129e-06	7.70554e-08	4.80135e-06	1.54437e-07	3.85706e-07	3.30001e-07	1.10593e-06	0.00521059	5.40284e-06	9.249e-07	6.8372e-09	7.55201e-11	5.26834e-08	2.00834e-11	1.10619e-10	9.0218e-13	4.28273e-12	2.15326e-10	1.92396e-05	3.82527e-11	2.32427e-11	9.04846e-13
20247	Total errors traversing numeric path (trail #1)	12926	-0.00385217	0.263005	0.41599	0.352783	0.159716	0.545747	0.314083	0.225491	0.457364	0.195819	0.245509	0.23447	0.903574	0.836042	0.925151	0.923086	0.613778	0.948621	0.866137	0.653818	0.804556	0.66677	0.697975
20248	Total errors traversing alphanumeric path (trail #2)	19971	-0.122786	0.000533907	0.00014951	0.000280717	0.000940831	0.00105267	0.000308754	8.47917e-05	0.0107177	0.000639588	0.00100702	0.000195783	1.83048e-06	2.85226e-06	2.08823e-06	0.000339824	2.74675e-07	2.83092e-06	6.49317e-06	1.56061e-05	1.44381e-06	1.02063e-06	7.40324e-06
20251	Susceptibility weighted brain images - NIFTI	19650	0	1	1	1	1	1	1	1	1	1	1	1	1	1	1	1	1	1	1	1	1	1	1
20252	T1 structural brain images - NIFTI	22392	0	1	1	1	1	1	1	1	1	1	1	1	1	1	1	1	1	1	1	1	1	1	1
20253	T2 FLAIR structural brain images - NIFTI	21708	0	1	1	1	1	1	1	1	1	1	1	1	1	1	1	1	1	1	1	1	1	1	1
20254	Liver images - IDEAL protocol - DICOM	30113	0	1	1	1	1	1	1	1	1	1	1	1	1	1	1	1	1	1	1	1	1	1	1
20400	Date of completing mental health questionnaire	157383	0	1	1	1	1	1	1	1	1	1	1	1	1	1	1	1	1	1	1	1	1	1	1
20401	Ever addicted to any substance or behaviour	72617	-0.215592	0.382978	0.202794	0.155988	0.567566	0.637302	0.423701	0.382536	0.259797	0.298224	0.563513	0.211247	0.121789	0.0846896	0.0756293	0.128057	0.0657995	0.0776305	0.262957	0.447685	0.0406345	0.167633	0.0725668
20403	Amount of alcohol drunk on a typical drinking day	65459	0.812274	0.000159355	0.00050008	0.000246972	0.000194612	8.34064e-05	0.000292079	6.29706e-05	0.000182254	1.6983e-05	2.41068e-05	0.000154494	0.000323779	0.00501514	9.99475e-05	0.000341718	0.00246377	0.000408083	0.00158583	0.000168728	0.000167853	0.000406047	0.000172698
20404	Ever physically dependent on alcohol	1229	3.04115	0.671384	0.714459	0.501016	0.348087	0.33272	0.668486	0.630282	0.612511	0.573411	0.619827	0.660673	0.260127	0.446149	0.169243	0.264798	0.228299	0.267982	0.226924	0.203704	0.316033	0.21419	0.512774
20405	Ever had known person concerned about, or recommend reduction of, alcohol consumption	72617	-0.26948	0.182626	0.322517	0.318757	0.0206572	0.0903538	0.217935	0.163086	0.0745572	0.109503	0.204464	0.169565	0.488831	0.664184	0.507925	0.529344	0.708544	0.704277	0.338581	0.286483	0.365175	0.628581	0.666384
20406	Ever addicted to alcohol	3531	-0.414291	0.0430278	0.163161	0.0848234	0.0612956	0.0951848	0.0556144	0.0633048	0.00437296	0.0417265	0.0422822	0.0260994	0.157814	0.0756929	0.106863	0.343127	0.346478	0.168305	0.26957	0.282854	0.0622602	0.149757	0.0377109
20407	Frequency of failure to fulfil normal expectations due to drinking alcohol in last year	32567	-1.01597	0.0841348	0.258708	0.0994609	0.139253	0.115347	0.103075	0.0432242	0.0241937	0.368558	0.0813551	0.0698146	0.242133	0.534827	0.213727	0.157737	0.484266	0.106013	0.427168	0.0816528	0.288401	0.250841	0.368501
20408	Frequency of memory loss due to drinking alcohol in last year	32567	0.509903	0.240179	0.391953	0.262807	0.0569794	0.192194	0.241474	0.318058	0.237431	0.468159	0.239091	0.160965	0.337354	0.304538	0.547238	0.195573	0.286467	0.275588	0.400845	0.316008	0.313709	0.32662	0.225216
20409	Frequency of feeling guilt or remorse after drinking alcohol in last year	32567	0.632629	0.44658	0.51429	0.479595	0.439801	0.525615	0.430289	0.483013	0.426898	0.666402	0.481829	0.236522	0.177005	0.452467	0.211684	0.240846	0.0421136	0.074665	0.170253	0.236383	0.17792	0.0971531	0.168518
20410	Age when known person last commented about drinking habits	1698	0.0257831	0.181495	0.29282	0.0735162	0.221586	0.0988275	0.180493	0.294133	0.449628	0.201995	0.169698	0.270541	0.775469	0.190189	0.683964	0.795999	0.701326	0.877784	0.840808	0.891659	0.333778	0.961383	0.904353
20411	Ever been injured or injured someone else through drinking alcohol	72617	0.332938	0.502912	0.222705	0.419997	0.560714	0.511146	0.499201	0.453803	0.675239	0.477806	0.432435	0.321128	0.602237	0.557845	0.713254	0.191189	0.890844	0.903964	0.851673	0.506904	0.663758	0.346949	0.835828
20412	Frequency of needing morning drink of alcohol after heavy drinking session in last year	32567	-2.12278	0.0388304	0.0463075	0.0165888	0.0406085	0.0287593	0.0397526	0.038912	0.298585	0.0475027	0.0398575	0.0226638	0.238544	0.0471314	0.167239	0.179608	0.673305	0.130794	0.382337	0.194522	0.345016	0.373372	0.240395
20413	Frequency of inability to cease drinking in last year	32567	0.63973	0.0998431	0.139604	0.142338	0.257728	0.0508753	0.147393	0.0846001	0.137057	0.0561303	0.109667	0.1455	0.146729	0.30735	0.166165	0.265855	0.327728	0.283914	0.0765135	0.100287	0.145934	0.0906972	0.0775542
20414	Frequency of drinking alcohol	72617	0.670352	0.222118	0.510895	0.176878	0.149158	0.304369	0.227445	0.320163	0.173537	0.106174	0.0360771	0.14488	0.108471	0.0386317	0.0548636	0.039193	0.449708	0.149011	0.0844528	0.131491	0.109473	0.104691	0.117457
20415	Ongoing addiction to alcohol	1229	0.80737	0.490583	0.65593	0.647713	0.522977	0.377954	0.382992	0.598364	0.586283	0.479705	0.326053	0.398159	0.395573	0.340208	0.349305	0.429104	0.380675	0.591935	0.447757	0.410166	0.438446	0.584006	0.226476
20416	Frequency of consuming six or more units of alcohol	65459	0.920509	0.0169436	0.0199346	0.0791123	0.00435203	0.0405267	0.0166501	0.00681973	0.00566163	0.00535617	0.006377	0.0158543	0.0220713	0.00789913	0.0126798	0.0160288	0.328453	0.00904347	0.00585397	0.0250359	0.0316924	0.0232086	0.0383008
20417	Tense, sore, or aching muscles during worst period of anxiety	25603	0.0425335	0.305635	0.0576884	0.183057	0.254824	0.146668	0.263836	0.229808	0.327632	0.256034	0.194094	0.404544	0.612474	0.202939	0.723095	0.48006	0.422689	0.758002	0.81794	0.279005	0.532249	0.552712	0.928483
20418	Impact on normal roles during worst period of anxiety	25603	-0.27938	0.526691	0.225	0.388666	0.624057	0.320056	0.61195	0.614692	0.625338	0.61127	0.586547	0.45205	0.633336	0.550026	0.546751	0.633297	0.587168	0.771563	0.685332	0.721092	0.623401	0.68602	0.319398
20419	Difficulty concentrating during worst period of anxiety	25603	-0.168229	0.0468051	0.126503	0.0248101	0.00938788	0.0546475	0.0811935	0.0401264	0.200815	0.111881	0.09015	0.0429976	0.13511	0.340631	0.0937647	0.152032	0.479952	0.117739	0.298995	0.706517	0.142033	0.167402	0.0248455
20420	Longest period spent worried or anxious	20527	-0.0467098	0.000153256	8.43611e-05	0.000282648	0.00350198	3.74733e-05	0.000226369	0.000460323	0.354802	1.43567e-05	0.000146462	4.39061e-05	0.068178	0.0731845	0.082872	0.0785153	0.00191215	0.0401132	0.0598646	0.147432	0.0422181	0.058536	0.134546
20421	Ever felt worried, tense, or anxious for most of a month or longer	72617	-0.175349	0.000199213	0.00108709	1.49168e-05	0.000670731	0.00228389	0.000111786	0.000192325	0.142459	0.000147756	0.00154524	1.90576e-05	0.00077955	0.000122673	0.000513367	0.00260199	0.00453204	6.26844e-05	0.00359596	0.00529188	4.27668e-05	0.000858586	0.00017991
20422	More irritable than usual during worst period of anxiety	25603	0.0939434	0.00579968	0.00249693	0.00502262	0.0265724	0.0149235	0.00938754	0.00374738	0.0439105	0.00739403	0.00886254	0.016642	0.285094	0.0551489	0.290514	0.157418	0.492867	0.459976	0.432845	0.113481	0.262347	0.199973	0.642794
20423	Keyed up or on edge during worst period of anxiety	25603	-0.187915	0.101354	0.0840666	0.0798664	0.256126	0.215953	0.0943979	0.11171	0.180033	0.0624489	0.126907	0.134066	0.106676	0.243197	0.0871097	0.147948	0.261501	0.0610008	0.212251	0.0982984	0.0618824	0.109688	0.0342251
20425	Ever worried more than most people would in similar situation	72617	0.134247	1.1405e-11	2.87979e-11	1.50525e-11	1.32839e-11	5.50645e-11	1.08712e-11	3.29051e-10	0.0120186	1.17741e-12	4.17687e-12	2.22545e-12	0.00156504	0.000311676	0.000912096	0.000206691	0.000259065	0.000647005	0.0016137	0.0176523	9.39647e-05	0.00349592	5.98811e-05
20426	Restless during period of worst anxiety	25603	-0.106024	0.259833	0.295314	0.138618	0.502421	0.409697	0.318606	0.195032	0.460367	0.249453	0.423691	0.329203	0.234369	0.166567	0.180659	0.410031	0.595765	0.15192	0.390484	0.502907	0.228012	0.268968	0.069459
20427	Frequent trouble falling or staying asleep during worst period of anxiety	25603	0.132614	0.806151	0.902214	0.45884	0.880322	0.72925	0.795352	0.910042	0.450422	0.538138	0.901559	0.614274	0.36034	0.437399	0.365323	0.162407	0.114512	0.21842	0.262191	0.268188	0.357887	0.338976	0.204238
20428	Professional informed about anxiety	25603	-1.10327	0.152358	0.142557	0.218779	0.212149	0.215781	0.162671	0.161237	0.144056	0.0999867	0.14017	0.130768	0.137221	0.0420901	0.118356	0.389912	0.157139	0.229141	0.153383	0.225974	0.272286	0.0824811	0.0665759
20429	Easily tired during worst period of anxiety	25603	0.161156	0.122612	0.0704502	0.0656117	0.190017	0.269564	0.114066	0.235638	0.192029	0.137263	0.111672	0.0962951	0.0839569	0.07066	0.165028	0.0377624	0.133463	0.109618	0.167008	0.401565	0.0340183	0.0997096	0.144589
20431	Ever addicted to a behaviour or miscellanous	3531	1.35887	0.0994796	0.106693	0.0372152	0.119372	0.230231	0.0666278	0.173648	0.223336	0.114286	0.125618	0.179759	0.647638	0.500583	0.718031	0.574369	0.488953	0.521825	0.427662	0.602051	0.700995	0.576637	0.677059
20432	Ongoing behavioural or miscellanous addiction	606	1.69911	0.319055	0.378476	0.451535	0.511368	0.248	0.315039	0.212985	0.116187	0.464384	0.802507	0.136269	0.108959	0.393769	0.129401	0.160528	0.157628	0.0631048	0.0466157	0.084195	0.208326	0.147618	0.151038
20433	Age at first episode of depression	42683	-0.0163429	0.597377	0.509583	0.290441	0.547752	0.954885	0.702769	0.891184	0.584409	0.547709	0.793632	0.0240109	0.355159	0.727655	0.184826	0.28084	0.953047	0.0722498	0.769963	0.636114	0.318688	0.305893	0.0827885
20434	Age at last episode of depression	41404	0.123931	6.23325e-12	3.97368e-11	3.39073e-11	8.77447e-12	4.76578e-12	4.9988e-12	2.41436e-12	0.00568046	8.47542e-14	2.20114e-11	6.12778e-14	4.59504e-12	1.04563e-16	6.12072e-11	1.92922e-11	4.63879e-12	7.14697e-12	3.11027e-12	0.00403304	3.74385e-15	2.17441e-11	1.03961e-10
20435	Difficulty concentrating during worst depression	46526	-0.229645	0.0309048	0.0272912	0.0501101	0.0761236	0.0222282	0.0328573	0.0544098	0.517288	0.0148589	0.0519176	0.0542819	0.000270307	0.000103587	8.78505e-05	6.82588e-05	0.00537552	0.000324174	0.00106688	0.0275322	0.000349932	0.000442485	3.05511e-05
20436	Fraction of day affected during worst episode of depression	46526	0.28688	0.00182578	0.00572224	0.00134231	0.00181478	0.00673478	0.00246142	0.00076837	0.442534	0.00107261	0.000737638	1.87745e-05	0.000181668	2.50934e-05	0.000644836	3.8671e-05	0.00028941	0.000572096	9.81154e-05	0.0838054	6.08819e-05	0.000619737	0.000145549
20437	Thoughts of death during worst depression	46526	-0.712734	0.00218185	0.00368767	0.00111828	0.0012007	0.00390102	0.00157984	0.00301036	0.00846598	0.000730475	0.0042103	0.00079033	0.00599988	0.00648099	0.00933569	0.00650405	0.0400748	0.0026448	0.00450887	0.0291225	0.00542439	0.00326845	0.0193406
20438	Duration of worst depression	46526	0.407737	0.192969	0.193214	0.156935	0.20605	0.320048	0.17848	0.243518	0.622325	0.139253	0.0668708	0.145482	0.00249959	0.000319733	0.00345534	0.0048178	0.0243723	0.00374795	0.00302718	0.0113496	0.00527913	0.00270218	0.00400509
20439	Frequency of depressed days during worst episode of depression	46526	0.250554	0.00185479	0.000532706	0.0107642	0.00188675	0.000781786	0.00422559	0.00310411	0.137119	0.00165827	0.00105932	0.000233048	0.0158738	0.00807964	0.014644	0.0049652	0.0109054	0.0137694	0.00622941	0.0809647	0.0104527	0.00749922	0.00387476
20440	Impact on normal roles during worst period of depression	46526	0.94181	0.0773229	0.109471	0.0464193	0.0926823	0.136536	0.135376	0.169254	0.142979	0.0383813	0.0664813	0.0108195	0.00319432	0.00108266	0.00868235	0.00705645	0.0154617	0.00524815	0.00438885	0.0258766	0.00372182	0.00262845	0.000835055
20441	Ever had prolonged loss of interest in normal activities	72617	-0.15056	0.00679656	0.0376525	0.00885791	0.00407489	0.0037129	0.00420997	0.00782809	0.0597195	0.00583985	0.00674469	0.00444753	0.514351	0.0745711	0.400741	0.464277	0.285982	0.442385	0.546433	0.719748	0.518357	0.54923	0.492323
20442	Lifetime number of depressed periods	44022	-0.0434101	3.0322e-07	9.69893e-08	4.33091e-07	1.54934e-06	1.54312e-06	3.25893e-07	1.92035e-08	0.876299	1.11452e-07	1.24993e-06	8.12066e-08	0.0126069	0.000410049	0.00971541	0.0122069	0.0965556	0.00133796	0.00912331	0.000163261	0.000804378	0.00885817	0.0024257
20445	Depression possibly related to childbirth	46526	-0.626896	0.196936	0.126874	0.332892	0.452245	0.170053	0.171338	0.160751	0.681077	0.144326	0.11145	0.0904369	0.111442	0.215145	0.107676	0.0858182	0.130964	0.117753	0.163708	0.294898	0.109525	0.196429	0.102876
20446	Ever had prolonged feelings of sadness or depression	72617	0.564419	0.234491	0.32975	0.271242	0.27715	0.347298	0.151892	0.186278	0.36163	0.283933	0.122029	0.106737	0.0219048	0.140646	0.0337278	0.0412343	0.00225561	0.00476561	0.0108502	0.161651	0.0435565	0.0335603	0.0316643
20447	Depression possibly related to stressful or traumatic event	46526	0.179054	0.221585	0.483814	0.143322	0.159409	0.24282	0.328034	0.235975	0.0825099	0.128452	0.0802141	0.260751	0.512423	0.218918	0.585928	0.182929	0.659142	0.620525	0.259982	0.86818	0.592041	0.609075	0.713229
20448	Professional informed about depression	46526	0.207829	0.360702	0.405889	0.484884	0.118139	0.234853	0.32724	0.470503	0.487892	0.358415	0.297403	0.135542	0.498767	0.270801	0.456187	0.174874	0.669029	0.554042	0.238294	0.629035	0.377794	0.534673	0.203188
20449	Feelings of tiredness during worst episode of depression	46526	-0.261146	0.00675849	0.0130659	0.0152311	0.011921	0.00255392	0.00579693	0.00426631	0.36292	0.00214369	0.0121688	0.0111945	0.000235116	0.00100516	8.50079e-05	8.38555e-05	0.00183367	4.60613e-05	0.000310946	0.0136647	5.9999e-05	0.000391936	2.80868e-05
20450	Feelings of worthlessness during worst period of depression	46526	-0.202126	0.000537764	0.00125742	0.000935513	0.00012144	0.00114994	0.000529166	0.000516221	0.0241333	0.0002775	0.000898712	0.000574151	0.00339564	0.00253248	0.00182578	0.00670348	0.030741	0.00165848	0.00448695	0.00621591	0.00376475	0.00298012	0.00598639
20453	Ever taken cannabis	72617	0.70578	0.215511	0.154936	0.280958	0.0544521	0.282605	0.219324	0.158242	0.358626	0.346636	0.159554	0.0404515	0.0796684	0.106819	0.0732208	0.207907	0.102316	0.0565574	0.042661	0.148825	0.0640928	0.0599027	0.129366
20454	Maximum frequency of taking cannabis	13346	-0.624158	0.0830738	0.0684135	0.0996579	0.0856856	0.0673647	0.134079	0.134677	0.0203029	0.150939	0.0562634	0.0111716	0.0508566	0.0105017	0.0401724	0.107968	0.0266792	0.0420394	0.0601466	0.104167	0.0416697	0.0388763	0.242818
20455	Age when last took cannabis	13346	0.0799464	0.726052	0.322012	0.526946	0.712496	0.767838	0.827347	0.616382	0.0277227	0.766365	0.556338	0.551439	0.0112807	7.69487e-05	0.00389401	0.013094	0.334748	0.0985663	0.00106351	0.869015	0.00327455	0.0196194	0.0742691
20456	Ever addicted to illicit or recreational drugs	3531	-4.32713	0.154789	0.248804	0.275085	0.176574	0.061073	0.12284	0.10869	0.586579	0.185991	0.110784	0.168895	0.026186	0.0378824	0.0314618	0.0309018	0.0981428	0.0140093	0.0128479	0.0440563	0.0215129	0.0445436	0.0262539
20457	Ongoing addiction or dependence on illicit or recreational drugs	194	2.03973	0.659505	0.59269	0.497121	0.588693	0.424664	0.649293	0.671684	0.766967	0.340581	0.8501	0.470057	0.23387	0.527397	0.3208	0.37069	0.278883	0.0577933	0.29814	0.385792	0.107645	0.21171	0.496963
20458	General happiness	72617	0.416636	0.00677391	0.0138257	0.00134316	0.00976026	0.0102801	0.00548796	0.0075841	0.0170736	0.0199584	0.00445854	0.014574	0.0306093	0.0135265	0.0232007	0.0292766	0.0253063	0.0272653	0.0342167	0.00816311	0.0244295	0.0240125	0.0297399
20459	General happiness with own health	72617	0.643071	0.0995116	0.029272	0.101166	0.150749	0.141975	0.177029	0.044847	0.120396	0.237084	0.124081	0.181107	0.0243085	0.128708	0.0178681	0.0132616	0.0462108	0.0427247	0.00983324	0.000320917	0.0563042	0.0128081	0.140706
20460	Belief that own life is meaningful	72617	0.309184	0.000251181	0.00115486	4.65773e-05	0.00142864	0.000829222	0.000328561	0.000216064	0.0373838	1.56887e-05	0.000374996	0.0049034	0.00809499	0.00105235	0.00679657	0.00246448	0.00865818	0.0171602	0.00101736	0.0246775	0.0115272	0.00738313	0.0076418
20461	Age when first had unusual or psychotic experience	3263	0.0236778	0.312903	0.681625	0.418474	0.150224	0.428463	0.261789	0.297931	0.375666	0.272912	0.291042	0.201351	0.712312	0.839737	0.579429	0.482525	0.568736	0.519163	0.6842	0.313793	0.869058	0.640394	0.283155
20462	Distress caused by unusual or psychotic experiences	3782	0.846969	0.0424935	0.0722477	0.0316364	0.0309466	0.0144274	0.0803667	0.0547738	0.0729745	0.24587	0.0382004	0.0896955	0.0532593	0.125315	0.0353143	0.104975	0.0765681	0.0380272	0.0410272	0.0624904	0.0555702	0.0500599	0.044913
20463	Ever heard an un-real voice	72617	-0.628236	0.409261	0.329913	0.507362	0.194044	0.287341	0.633193	0.500183	0.156823	0.400676	0.222412	0.519982	0.274864	0.117272	0.155673	0.29716	0.379679	0.33853	0.200263	0.244699	0.395972	0.23031	0.334067
20465	Number of times heard an un-real voice	1033	0.176483	0.18073	0.6503	0.200209	0.239341	0.0974972	0.156468	0.297948	0.136782	0.12422	0.151935	0.272445	0.133126	0.285827	0.0963831	0.0608469	0.305392	0.0633801	0.329018	0.00554558	0.130862	0.206229	0.0890657
20466	Ever prescribed a medication for unusual or psychotic experiences	3782	1.10833	0.0624563	0.0123173	0.0756465	0.148864	0.0873629	0.0387053	0.0500285	0.0302623	0.0196778	0.0826097	0.221567	0.0882737	0.0972724	0.0874864	0.0393193	0.102133	0.0935988	0.0488373	0.334717	0.10751	0.080113	0.140424
20467	Frequency of unusual or psychotic experiences in past year	3782	1.36476	0.685578	0.655178	0.419987	0.793566	0.445296	0.761747	0.738185	0.600177	0.535536	0.762409	0.732102	0.14775	0.463536	0.157958	0.231143	0.22562	0.113884	0.10984	0.0651097	0.110963	0.114938	0.379699
20468	Ever believed in an un-real conspiracy against self	72617	0.303195	0.52978	0.23094	0.804165	0.424554	0.767882	0.369066	0.227774	0.276913	0.671321	0.763532	0.686562	0.72397	0.63693	0.742384	0.478873	0.468332	0.701809	0.83851	0.701047	0.529535	0.50816	0.611474
20470	Number of times believed in an un-real conspiracy against self	379	-0.38816	0.921832	0.371957	0.910764	0.660557	0.92637	0.983935	0.709603	0.846511	0.760653	0.910612	0.994563	0.0583948	0.0872238	0.0790526	0.043829	0.0272919	0.0774361	0.0205984	0.182535	0.110037	0.0699438	0.0488126
20471	Ever seen an un-real vision	72617	0.226485	0.462127	0.602591	0.502355	0.650682	0.321265	0.466814	0.615745	0.375925	0.394274	0.474707	0.668842	0.139735	0.0410561	0.106455	0.223093	0.0576863	0.248285	0.142137	0.0374172	0.172861	0.195804	0.257019
20473	Number of times seen an un-real vision	2160	0.00946567	0.0170114	0.11989	0.0356839	0.0164726	0.0134779	0.0204688	0.0173982	0.00422329	0.0653036	0.0182934	0.00758717	0.904794	0.97285	0.693438	0.653291	0.509786	0.732616	0.805574	0.487944	0.611742	0.826955	0.418735
20474	Ever believed in un-real communications or signs	72617	0.551669	0.599123	0.691882	0.405169	0.346086	0.411188	0.609609	0.583758	0.346894	0.489586	0.493276	0.458983	0.0906033	0.175962	0.0911362	0.0646343	0.0543833	0.117274	0.112962	0.207861	0.115773	0.0480835	0.10482
20476	Number of times believed in un-real communications or signs	393	-0.465587	0.724887	0.49243	0.909287	0.919386	0.974546	0.694168	0.818335	0.585242	0.468775	0.664331	0.539744	0.0121605	0.272369	0.0138422	0.0105387	0.0041511	0.0308033	0.000458853	0.057028	0.0329152	0.0105409	0.0745504
20477	Ever talked to a health professional about unusual or psychotic experiences	3782	1.15773	0.521785	0.190614	0.585941	0.488696	0.543177	0.564227	0.511372	0.241979	0.365815	0.458395	0.484056	0.120799	0.157156	0.0652621	0.031986	0.0464474	0.215946	0.115055	0.0694872	0.220925	0.130197	0.419367
20479	Ever thought that life not worth living	72617	0.27519	0.000575611	0.00038366	0.00122202	0.00132481	0.00101479	0.00150923	0.00178243	0.00771372	0.000656289	0.000465799	4.79967e-05	0.0688256	0.10533	0.105845	0.0246189	0.00612529	0.0703418	0.164433	0.243122	0.0519173	0.0501515	0.136259
20480	Ever self-harmed	72617	0.233711	0.460592	0.536203	0.484894	0.301788	0.491605	0.45802	0.346434	0.802225	0.46205	0.435071	0.225229	0.312232	0.575134	0.326856	0.25005	0.125064	0.273236	0.220955	0.257619	0.213893	0.30651	0.594116
20481	Self-harmed in past year	3753	0.254016	0.0658434	0.132697	0.0800871	0.0664029	0.0288319	0.0744811	0.0504475	0.232643	0.07072	0.0856692	0.133791	0.808225	0.731326	0.618867	0.579226	0.761787	0.891922	0.804529	0.750915	0.603681	0.86152	0.614756
20482	Number of times self-harmed	3753	0.127499	0.085352	0.184978	0.152849	0.0966222	0.037849	0.111354	0.0351125	0.111545	0.237344	0.0909372	0.0740648	0.793112	0.694002	0.701624	0.775423	0.621718	0.77459	0.723086	0.628891	0.743574	0.778333	0.429154
20483	Ever attempted suicide	3753	0.458436	0.0921492	0.0962219	0.0518091	0.0945979	0.0334448	0.105954	0.188733	0.136771	0.0521653	0.0947991	0.290608	0.190241	0.387851	0.165194	0.257408	0.257203	0.093735	0.235491	0.0862013	0.148858	0.270333	0.219052
20484	Attempted suicide in past year	1909	-4.8526	0.828108	0.766421	0.736568	0.778025	0.833608	0.697307	0.64458	0.538617	0.747073	0.778385	0.756242	0.0350023	0.0862795	0.0590248	0.0578039	0.0636864	0.0331542	0.0618064	0.091821	0.0381924	0.022902	0.0131975
20485	Ever contemplated self-harm	72617	-0.247259	0.0963381	0.170464	0.180791	0.0831229	0.12181	0.0925835	0.124704	0.0973877	0.0740987	0.0666158	0.0528112	0.214152	0.304032	0.148353	0.149219	0.390126	0.181963	0.295177	0.78837	0.156697	0.251719	0.135195
20486	Contemplated self-harm in past year	12174	0.0761126	0.559103	0.373077	0.559336	0.785844	0.644477	0.651712	0.623791	0.350512	0.433708	0.508002	0.880925	0.875156	0.762525	0.631252	0.684918	0.778205	0.662865	0.77841	0.735184	0.696492	0.539095	0.798712
20487	Felt hated by family member as a child	72617	0.300823	0.183142	0.0222612	0.337498	0.262726	0.170056	0.156241	0.267343	0.450438	0.349181	0.366374	0.423124	0.211728	0.0771582	0.204334	0.109436	0.0683396	0.179232	0.237389	0.525962	0.23012	0.221324	0.353716
20488	Physically abused by family as a child	72617	0.638319	0.258705	0.525794	0.121615	0.174071	0.26659	0.216756	0.170362	0.112762	0.194188	0.231775	0.520957	0.0258836	0.00506465	0.0303165	0.0612003	0.0169202	0.019597	0.0976308	0.0727549	0.0207488	0.0197611	0.0568629
20489	Felt loved as a child	72617	0.385698	0.152175	0.243046	0.128783	0.202648	0.156951	0.28984	0.0887154	0.0303969	0.0933907	0.197289	0.149351	0.0959724	0.102575	0.104497	0.0449399	0.0406001	0.0642501	0.1415	0.602288	0.207221	0.0722873	0.0876333
20490	Sexually molested as a child	72617	0.547886	0.150089	0.297135	0.200439	0.0466003	0.154115	0.145359	0.0788204	0.470755	0.122756	0.0914413	0.0064666	9.27944e-06	6.27388e-05	1.72315e-06	2.05909e-07	2.0482e-05	9.34072e-06	2.89286e-05	0.00140621	1.28239e-05	2.80765e-06	3.19372e-06
20491	Someone to take to doctor when needed as a child	72617	0.41319	0.304786	0.203049	0.455913	0.323216	0.093306	0.337543	0.281072	0.266715	0.426142	0.216478	0.107002	0.00932776	0.0317223	0.0166348	0.0031506	0.00500906	0.00774778	0.0426164	0.0514643	0.0156706	0.00392763	0.00626729
20492	Longest period of mania or irritability	19633	0.125893	0.0595821	0.127939	0.0580473	0.0350695	0.0494397	0.0641123	0.030535	0.0497081	0.0833263	0.0825015	0.083664	0.157672	0.103324	0.189665	0.142783	0.0389887	0.152867	0.270191	0.143556	0.189815	0.179009	0.277754
20493	Severity of problems due to mania or irritability	19633	-0.49567	0.0295486	0.00814517	0.0127958	0.117055	0.101134	0.0355717	0.0345154	0.612912	0.00681527	0.0675257	0.0455339	0.0566104	0.152241	0.0378492	0.0790014	0.0526355	0.133782	0.0578978	0.0157275	0.0534881	0.0766684	0.0231871
20494	Felt irritable or had angry outbursts in past month	36625	0.505766	0.00392177	0.0144998	0.00476849	0.00723972	0.0196589	0.00892775	0.00220726	0.000974123	0.000503655	0.00233746	0.0246173	0.250889	0.660758	0.359179	0.586777	0.139451	0.208669	0.258718	0.306805	0.304313	0.172126	0.306602
20495	Avoided activities or situations because of previous stressful experience in past month	72617	0.328619	0.542288	0.164984	0.664191	0.627672	0.574335	0.44657	0.573099	0.854672	0.702904	0.477272	0.317261	0.345903	0.3906	0.440939	0.659297	0.190117	0.438851	0.327626	0.467533	0.334392	0.393341	0.332904
20496	Felt distant from other people in past month	36625	1.04533	0.134638	0.343091	0.140202	0.141208	0.4128	0.231891	0.138297	0.0535356	0.0322012	0.100269	0.188463	0.020286	0.0653799	0.0221723	0.0415783	0.045777	0.0273638	0.0214063	0.0296911	0.00877869	0.00875837	0.0838029
20497	Repeated disturbing thoughts of stressful experience in past month	72617	0.382779	0.096175	0.256335	0.100658	0.220031	0.19777	0.145041	0.0674016	0.0679979	0.0369607	0.0764658	0.034596	0.259336	0.270716	0.280207	0.251523	0.0899544	0.342709	0.467926	0.721159	0.264098	0.29498	0.0812547
20498	Felt very upset when reminded of stressful experience in past month	72617	0.258669	0.0497577	0.184779	0.039669	0.0376907	0.0562474	0.0713186	0.0533765	0.0313347	0.0268684	0.0374447	0.108717	0.421181	0.165156	0.384905	0.558518	0.171208	0.64639	0.482323	0.605796	0.390361	0.387102	0.423061
20499	Ever sought or received professional help for mental distress	72617	-0.813523	0.401864	0.224975	0.484273	0.371106	0.269741	0.218942	0.531404	0.716566	0.6403	0.212103	0.313761	0.0735482	0.163105	0.0986376	0.205086	0.101768	0.0894156	0.0671563	0.0576715	0.0865799	0.0468695	0.055692
20500	Ever suffered mental distress preventing usual activities	72617	-0.183008	0.355071	0.359829	0.19352	0.365359	0.315327	0.321084	0.356526	0.620719	0.243584	0.330396	0.07596	0.185713	0.0233241	0.177262	0.0698244	0.125394	0.128695	0.139753	0.293857	0.189882	0.218722	0.155307
20501	Ever had period of mania / excitability	72617	0.205591	0.324423	0.352198	0.152906	0.301615	0.361459	0.404324	0.0810379	0.154712	0.185093	0.46813	0.165405	0.0949632	0.0642767	0.111627	0.061608	0.11654	0.066622	0.038919	0.0174913	0.0929113	0.101047	0.143199
20502	Ever had period extreme irritability	72617	-1.25567	0.000318674	0.000201129	8.02068e-05	0.000419605	0.00342201	0.000328864	0.000156383	0.115196	0.00019752	0.000998215	5.7305e-05	4.36528e-05	0.000167124	0.000160122	8.65611e-05	0.000429259	3.08523e-06	6.78043e-05	1.83576e-05	0.00012342	0.000202708	0.000430062
20503	Ever addicted to prescription or over-the-counter medication	3531	-3.17083	0.279485	0.390089	0.435663	0.168908	0.202211	0.249989	0.344734	0.498667	0.431698	0.357418	0.0714724	0.274541	0.268578	0.290543	0.12637	0.134694	0.195501	0.210306	0.131257	0.456829	0.358988	0.290538
20504	Ongoing addiction or dependence to over-the-counter medication	616	4.55294	0.751358	0.921897	0.766406	0.820554	0.519296	0.717454	0.595643	0.610387	0.820943	0.64232	0.924546	0.0213377	0.119437	0.0404936	0.0788943	0.0625671	0.0192624	0.0170544	0.0233553	0.0506829	0.0101876	0.00275003
20505	Recent easy annoyance or irritability	72617	0.340238	0.00140092	0.00619279	0.00156422	0.00457529	0.000513119	0.00221267	0.00215271	0.0873569	0.000907226	0.000649129	0.000479005	0.0970216	0.0298617	0.131571	0.0320004	0.202728	0.0901157	0.0946634	0.37756	0.0668598	0.112324	0.265442
20506	Recent feelings or nervousness or anxiety	72617	0.548519	0.0816914	0.216953	0.125035	0.104048	0.163354	0.0819178	0.035508	0.565171	0.0312573	0.0241741	0.0146472	0.010985	0.0375819	0.0129143	0.002008	0.00706914	0.0104367	0.0117861	0.0498494	0.00647668	0.012514	0.0431936
20507	Recent feelings of inadequacy	72617	0.473287	0.0784973	0.063363	0.254404	0.0292598	0.050284	0.0391765	0.0735628	0.78931	0.0696583	0.0450554	0.022739	0.0177117	0.0134882	0.0354827	0.00892292	0.0148572	0.0247255	0.00690138	0.049849	0.00776326	0.0142348	0.100411
20508	Recent trouble concentrating on things	72617	0.397797	0.0618585	0.147072	0.0554851	0.0450095	0.106954	0.0591456	0.0466834	0.174622	0.0200036	0.0812538	0.130586	0.252743	0.166555	0.24138	0.146205	0.294688	0.267275	0.14072	0.529058	0.254016	0.222245	0.494498
20509	Recent inability to stop or control worrying	72617	0.489847	0.0677953	0.230614	0.0762145	0.109655	0.0546331	0.0494492	0.045027	0.324043	0.04461	0.0341534	0.0484177	0.018742	0.0362378	0.028738	0.00862827	0.00450172	0.0181631	0.0258345	0.104446	0.00477538	0.0368401	0.112074
20510	Recent feelings of depression	72617	0.476786	0.000184614	0.000183346	0.000778415	0.000461073	9.92389e-05	0.000495044	5.21949e-05	0.00173804	3.12192e-05	0.000100782	0.000565436	0.0239965	0.0315043	0.035363	0.0624944	0.0127542	0.0112565	0.0349793	0.0738532	0.0147381	0.0170187	0.110348
20511	Recent poor appetite or overeating	72617	0.36961	0.000152126	0.00082628	0.000330294	4.38313e-05	5.51981e-05	0.000204934	0.000218277	0.00395639	6.28872e-05	0.000108235	0.00100267	0.261057	0.242854	0.192041	0.0713164	0.419159	0.328902	0.281887	0.0778034	0.209418	0.173707	0.435382
20512	Recent feelings of foreboding	72617	0.414786	0.0239804	0.00994819	0.0770266	0.0206921	0.0247968	0.0499983	0.0376779	0.117138	0.0111446	0.0117555	0.0344529	0.0377924	0.0765594	0.0541464	0.0688416	0.00499169	0.0228747	0.0186042	0.549351	0.0519903	0.0686913	0.0395625
20513	Recent thoughts of suicide or self-harm	72617	0.449808	0.105874	0.0660045	0.0958889	0.0484258	0.117398	0.0750413	0.0948209	0.364199	0.0856767	0.0739561	0.0527875	0.00647485	0.0234313	0.00598676	0.00349617	0.000736465	0.00151454	0.00778987	0.115951	0.00786263	0.0108529	0.00411068
20514	Recent lack of interest or pleasure in doing things	72617	0.54722	0.00560755	0.00817657	0.0152364	0.00603436	0.00146778	0.00795313	0.00158947	0.0370906	0.00037088	0.0059691	0.0204247	0.0354623	0.0143518	0.0504341	0.00722441	0.0433451	0.0212051	0.0744068	0.135144	0.0189019	0.0221835	0.164712
20515	Recent trouble relaxing	72617	0.598996	0.000689153	0.0110292	0.00220198	0.000146059	0.00375701	0.00107497	0.000734179	0.00908867	0.000623898	0.000174576	0.000145982	0.0104103	0.0261147	0.0100392	0.00849855	0.00336686	0.00732829	0.00714476	0.0393886	0.00919697	0.00506911	0.079837
20516	Recent restlessness	72617	0.318859	0.000508216	0.00323073	0.00318566	0.000550344	0.00134576	0.000787032	0.000710679	0.00285598	9.61974e-05	0.000236863	5.04951e-05	0.237508	0.0894279	0.222951	0.23483	0.267578	0.149977	0.219935	0.455251	0.355034	0.192504	0.34475
20517	Trouble falling or staying asleep, or sleeping too much	72617	-0.236276	4.55765e-06	3.58701e-06	1.60932e-05	2.01826e-06	6.24309e-06	2.02539e-06	2.08981e-06	6.25924e-05	1.19669e-05	7.5005e-07	0.00010336	0.425326	0.408334	0.408198	0.167939	0.180174	0.367862	0.429851	0.361596	0.178783	0.339339	0.277526
20518	Recent changes in speed/amount of moving or speaking	72617	0.87436	0.0164106	0.0196187	0.0517704	0.0192549	0.0166812	0.0377614	0.00838325	0.0167876	0.00911901	0.00291162	0.0134081	0.00464261	0.00988385	0.0056357	0.000503936	0.00594953	0.00317041	0.00740256	0.0018756	0.00434392	0.00417633	0.0428978
20519	Recent feelings of tiredness or low energy	72617	0.574918	0.00102165	0.000606953	0.001516	0.000414918	0.0013379	0.000899526	0.000701687	0.0399739	0.0014621	0.000113649	0.016585	0.0459104	0.0124737	0.0399558	0.0157578	0.0158334	0.0223276	0.0475768	0.281189	0.0864776	0.0709227	0.0348231
20520	Recent worrying too much about different things	72617	0.930904	0.0514634	0.321448	0.06121	0.134642	0.0749467	0.0654407	0.0196894	0.166218	0.0210341	0.0301164	0.0161875	7.2197e-06	1.66508e-05	9.13563e-06	2.3408e-07	1.73336e-05	1.14265e-05	9.02899e-06	0.00156931	3.26712e-06	1.04196e-05	0.00060067
20521	Belittlement by partner or ex-partner as an adult	72617	0.749239	1.3678e-05	2.94208e-05	4.83376e-06	1.56159e-05	7.65446e-05	1.89943e-05	9.81852e-06	4.22632e-05	1.7476e-05	1.78636e-05	3.78917e-05	0.00179867	0.000186588	0.00199584	0.000484065	0.00234082	0.0054847	0.00886987	0.03166	0.00450994	0.00219265	0.00103479
20522	Been in a confiding relationship as an adult	72617	0.392399	0.0298281	0.0132402	0.0148271	0.024463	0.0274673	0.0491139	0.0322747	0.049585	0.00463958	0.0259459	0.0138422	2.55637e-06	2.01884e-06	2.97312e-06	5.53357e-06	6.56378e-06	4.98101e-06	6.15867e-07	6.48394e-05	4.86445e-06	5.22124e-06	4.01809e-06
20523	Physical violence by partner or ex-partner as an adult	72617	0.707902	7.20149e-05	0.000200446	0.00011367	3.05286e-05	0.000167172	8.08205e-05	2.69562e-05	0.00111665	2.92603e-05	8.58525e-05	9.10984e-06	0.00222253	0.000411604	0.00532706	0.000459927	0.000494496	0.00684225	0.000944194	0.106478	0.00286654	0.00199447	0.00324308
20524	Sexual interference by partner or ex-partner without consent as an adult	72617	0.726836	0.00100617	0.00423236	0.00510491	0.00170885	0.010446	0.00126726	0.000460075	0.00211812	0.000309108	0.000834637	0.000181096	0.00103288	0.000315441	0.00121564	0.000341839	0.00140144	0.00250172	0.00288519	0.00608538	0.000375914	0.00119365	0.00216324
20525	Able to pay rent/mortgage as an adult	72617	0.504948	0.000684173	0.00200671	0.00049947	7.07403e-05	4.63695e-05	0.00172894	0.000332044	0.00840411	0.000664261	0.000457215	0.000106204	3.48736e-06	6.72897e-07	1.14768e-05	2.91785e-07	2.08842e-05	8.53695e-06	1.77886e-05	0.000389152	2.68249e-05	1.03638e-06	5.65246e-07
20526	Been in serious accident believed to be life-threatening	72617	1.5645	0.0276778	0.0118452	0.0498481	0.0446307	0.0588002	0.0331266	0.0296572	0.0138556	0.0261989	0.0110154	0.103051	0.00101728	0.000987556	0.00108552	0.00351778	0.000690995	0.00165128	0.000530602	0.00748368	0.00151387	0.000998871	0.00141898
20527	Been involved in combat or exposed to war-zone	72617	0.400957	0.128507	0.168302	0.181666	0.115047	0.0979209	0.159701	0.138927	0.144995	0.130612	0.0783027	0.299768	0.48202	0.658299	0.635321	0.475733	0.5088	0.390785	0.48255	0.464802	0.481256	0.293378	0.390447
20528	Diagnosed with life-threatening illness	72617	0.877768	0.0469748	0.0355243	0.144626	0.00575165	0.0294472	0.0601167	0.153938	0.00367972	0.0443548	0.0404375	0.00983485	6.72615e-06	5.9324e-06	1.0131e-05	1.04767e-05	1.57675e-05	3.01752e-06	1.6701e-05	1.4342e-06	5.26711e-06	3.19312e-06	0.000147841
20529	Victim of physically violent crime	72617	0.888966	0.101076	0.10081	0.136765	0.064699	0.187749	0.147213	0.148213	0.0334567	0.191078	0.139951	0.0428115	0.00146894	0.00132792	0.00195339	0.000302957	0.000903418	0.00159483	0.00195651	0.00511024	0.0025111	0.000573491	0.00451674
20530	Witnessed sudden violent death	72617	0.560983	0.0713458	0.0387804	0.143025	0.0123572	0.045702	0.121754	0.0607815	0.0433989	0.0450109	0.0667079	0.186571	0.0775719	0.269496	0.0746472	0.0820233	0.00190116	0.0970586	0.127027	0.260978	0.07331	0.0956208	0.0490959
20531	Victim of sexual assault	72617	0.525678	0.0146795	0.030312	0.00819571	0.0302755	0.0189417	0.0141859	0.0119865	0.0438447	0.01576	0.0111084	0.00783703	1.0457e-06	4.93394e-06	6.42954e-07	1.56918e-07	2.69838e-06	1.8147e-06	6.1806e-06	6.54785e-05	3.68079e-07	6.22491e-07	1.8138e-06
20532	Did your sleep change?	46526	-0.308187	0.0726178	0.0805591	0.133177	0.0556413	0.0110144	0.0866483	0.0268955	0.0445571	0.128045	0.0399307	0.0956904	1.05335e-06	1.59945e-05	1.9854e-07	1.25873e-05	3.10228e-06	2.00103e-06	3.32261e-07	1.6514e-05	6.26941e-07	4.25501e-07	1.07624e-06
20533	Trouble falling asleep	33093	-0.0274582	0.596155	0.100325	0.446656	0.783699	0.432543	0.635597	0.593173	0.599999	0.355948	0.847177	0.306642	0.56109	0.583335	0.523194	0.189621	0.45161	0.608559	0.609183	0.436992	0.845226	0.518421	0.0878268
20534	Sleeping too much	33093	0.0866962	0.00666058	0.015348	0.00498042	0.00402947	0.0247183	0.00590946	0.0127055	0.438692	0.0163022	0.00619078	9.93836e-05	0.0814727	0.00705759	0.156136	0.214778	0.431224	0.07312	0.0272005	0.00200736	0.0347063	0.138315	0.00524345
20535	Waking too early	33093	0.0932495	0.557169	0.999188	0.779294	0.91143	0.478268	0.712995	0.495107	0.0227244	0.857837	0.988326	0.240646	0.0492704	0.0752611	0.0552257	0.0655498	0.0458319	0.0434103	0.134756	1.62308e-06	0.0737183	0.0631005	0.129997
20536	Weight change during worst episode of depression	46526	-1.62581	0.000183062	0.000140717	0.000982406	1.36373e-06	0.000267825	0.000162408	0.000165043	0.0833782	8.0343e-06	0.00114827	0.00466995	0.00865691	0.00494452	0.00895225	0.018629	0.0103292	0.00556781	0.00406887	0.00725745	0.00832139	0.0167575	0.0064461
20537	Frequency of difficulty controlling worry during worst period of anxiety	25603	0.214137	0.421268	0.372344	0.364187	0.361706	0.352474	0.404886	0.369005	0.332678	0.248291	0.354871	0.296571	0.323295	0.266766	0.419595	0.341359	0.419865	0.28776	0.113502	0.510853	0.211593	0.352872	0.203657
20538	Worried most days during period of worst anxiety	25603	-0.101263	0.0978545	0.118666	0.117127	0.122525	0.160182	0.119335	0.15378	0.166431	0.100733	0.0811705	0.164179	0.483614	0.449912	0.472242	0.283154	0.492849	0.323896	0.461909	0.734597	0.149078	0.322042	0.529382
20539	Frequency of inability to stop worrying during worst period of anxiety	25603	0.360702	0.292913	0.187853	0.376184	0.484906	0.550007	0.276938	0.258434	0.118853	0.161727	0.358427	0.384762	0.158377	0.0756641	0.218744	0.180021	0.187362	0.107312	0.0665981	0.537497	0.174647	0.162751	0.265173
20540	Multiple worries during worst period of anxiety	25603	-0.314959	0.246414	0.126514	0.208367	0.282766	0.15184	0.221673	0.331763	0.248222	0.284044	0.210802	0.251658	0.0103469	0.0182803	0.00726977	0.0354999	0.107986	0.00398338	0.00484409	0.0254125	0.00542433	0.00450013	0.0276012
20541	Difficulty stopping worrying during worst period of anxiety	25603	-1.57901	0.235655	0.151259	0.207634	0.147797	0.187026	0.251797	0.264458	0.510158	0.222406	0.149213	0.0735298	0.0347537	0.0341741	0.0404208	0.0598324	0.0651166	0.0308986	0.022382	0.0125942	0.0144751	0.0286444	0.0234504
20542	Stronger worrying (than other people) during period of worst anxiety	25603	0.123809	0.037769	0.0460442	0.0374062	0.200713	0.0287963	0.0537159	0.0239317	0.090579	0.0158617	0.026271	0.0170365	0.0155472	0.0146466	0.0258888	0.0114409	0.0145729	0.00847175	0.00796902	0.00392762	0.0544731	0.0339016	0.00659374
20543	Number of things worried about during worst period of anxiety	25603	-0.659025	0.0396346	0.127957	0.103205	0.0169169	0.0196481	0.0309027	0.0603786	0.293869	0.0266485	0.0235461	0.101076	0.264564	0.294022	0.242963	0.227879	0.35569	0.216453	0.167694	0.287736	0.294913	0.242271	0.408002
20544	Mental health problems ever diagnosed by a professional	74887	0	1	1	1	1	1	1	1	1	1	1	1	1	1	1	1	1	1	1	1	1	1	1
20546	Substances taken for depression	25051	1.14701	0.0247411	0.0496227	0.0273134	0.00619984	0.0144881	0.0373197	0.0200778	0.249821	0.00982431	0.0111973	0.00105185	6.76648e-05	0.000554896	0.000241956	5.24287e-05	0.00173487	1.63611e-05	1.67589e-05	0.00194991	0.000176329	3.04242e-05	5.56479e-06
20547	Activities undertaken to treat depression	22793	0.774567	0.369375	0.365275	0.499952	0.510418	0.203883	0.254241	0.345846	0.508978	0.386455	0.477733	0.0291242	0.0354855	0.0246884	0.0699009	0.0747806	0.0365815	0.0144692	0.0162879	0.355488	0.0335648	0.0353149	0.0148012
20548	Manifestations of mania or irritability	12724	0.284161	0.110837	0.148725	0.175092	0.209069	0.206647	0.0971778	0.174513	0.0147562	0.129396	0.0579013	0.0702481	0.492919	0.452399	0.500541	0.472752	0.246549	0.670108	0.330809	0.215995	0.37194	0.590071	0.255892
20549	Substances taken for anxiety	14076	1.00973	0.0120459	0.020714	0.017808	0.00537669	0.0146262	0.00740116	0.0130815	0.0813202	0.006784	0.0130007	0.0103898	0.013671	0.0133616	0.0147694	0.00930004	0.0387467	0.0286332	0.0189104	0.0418583	0.024026	0.00697211	0.0115723
20550	Activities undertaken to treat anxiety	13598	1.29232	0.00543189	0.0485753	0.0122019	0.00271233	0.0140716	0.0024104	0.00955569	0.0189051	0.0024564	0.00301225	0.00654256	0.00878118	0.0231523	0.019228	0.0115733	0.0018483	0.00906449	0.00420182	0.0466072	0.0107299	0.00906645	0.0076709
20551	Substance of prescription or over-the-counter medication addiction	616	-3.33834	0.200205	0.555961	0.141459	0.119822	0.426067	0.212329	0.255749	0.293483	0.132525	0.253283	0.0393776	0.142671	0.1894	0.148944	0.24005	0.131336	0.106645	0.116164	0.110899	0.248131	0.181994	0.0776665
20552	Behavioural and miscellaneous addictions	606	-0.873171	0.0494576	0.120197	0.0670384	0.0266648	0.0623454	0.0853478	0.0576901	0.0168722	0.0865391	0.0406421	0.0648094	0.631455	0.609768	0.544127	0.12813	0.878982	0.7302	0.982196	0.784164	0.629169	0.640149	0.830807
20553	Methods of self-harm used	3753	-1.71591	0.369526	0.402614	0.472823	0.286841	0.449656	0.221333	0.339774	0.29102	0.163528	0.422737	0.310502	0.105617	0.153904	0.163403	0.294808	0.255525	0.168479	0.0301128	0.0182494	0.115617	0.0875132	0.267987
20554	Actions taken following self-harm	2394	1.16034	0.152077	0.165037	0.156834	0.17457	0.195169	0.180993	0.0803623	0.484087	0.199037	0.148418	0.453271	0.228051	0.227878	0.167507	0.609932	0.387905	0.159604	0.139316	0.163572	0.370165	0.256395	0.115332
21000	Ethnic background	533628	0	1	1	1	1	1	1	1	1	1	1	1	1	1	1	1	1	1	1	1	1	1	1
21001	Body mass index (BMI)	215388	-0.211734	2.25527e-35	1.30354e-48	6.61903e-09	7.61959e-35	6.97635e-33	3.58945e-36	8.24299e-32	3.39213e-33	2.68245e-41	3.67745e-50	7.71532e-45	4.06563e-147	6.5883e-191	7.39084e-302	1.90692e-172	2.05777e-162	1.91017e-154	2.15731e-160	3.41717e-179	2.56002e-151	1.60942e-181	1.21889e-161
21002	Weight	215447	0.0182413	6.63525e-65	1.16153e-67	9.72427e-131	2.2466e-74	2.58847e-78	6.49549e-72	2.27214e-70	1.37802e-79	3.89798e-67	1.09813e-71	2.02802e-75	0.0261897	0.0391459	7.50577e-18	0.0837159	0.00376834	0.117113	0.0151953	0.201143	0.0242858	0.000131932	0.0224804
21003	Age when attended assessment centre	215945	-5.05457e-06	0.994272	0.986282	0.956572	0.904658	0.991273	0.988182	0.861829	0.988657	0.90018	0.983384	0.986225	0.999508	0.948973	0.949141	0.95374	0.99674	0.785753	0.932002	0.995753	0.936993	0.991127	0.962867
21004	Number of puzzles correct	11665	0.196636	5.54123e-08	2.79805e-10	1.53409e-09	1.0281e-09	1.22465e-07	6.27764e-08	1.18284e-07	0.000182723	1.02855e-08	1.23433e-05	1.09681e-07	1.22657e-09	1.63084e-07	7.45148e-11	1.41244e-12	1.43819e-11	3.0808e-09	2.75585e-10	0.00126837	1.81081e-08	1.94223e-09	6.11513e-11
21021	Pulse wave Arterial Stiffness index	68049	-0.107306	0.377428	0.195991	0.536161	0.954105	0.463786	0.300315	0.0920794	0.0336342	0.0318113	0.223684	0.2978	1.55492e-13	8.55764e-09	1.50706e-11	1.63377e-12	3.59463e-15	1.76586e-14	3.00479e-11	1.02803e-16	7.93208e-17	6.37738e-14	2.30921e-14
21022	Age at recruitment	215945	-4.24859e-05	0.997864	0.982626	0.952827	0.901826	0.99431	0.991765	0.858666	0.985347	0.896524	0.979091	0.982792	0.995868	0.945653	0.94579	0.947447	0.994374	0.781697	0.928606	0.999294	0.934396	0.98697	0.961789
21023	When digestive health questionnaire completed	0	0	1	1	1	1	1	1	1	1	1	1	1	1	1	1	1	1	1	1	1	1	1	1
21024	Ever diagnosed with IBS	80946	-0.238465	0.0683975	0.118009	0.0201202	0.145661	0.246406	0.0862302	0.0380275	0.417708	0.177235	0.112088	0.000557313	0.631981	0.177653	0.389664	0.49284	0.151411	0.621239	0.746572	0.27519	0.408249	0.609815	0.272327
21025	Frequency of discomfort/pain in abdomen in last 3 months	80946	0.88998	0.199666	0.225375	0.329606	0.377279	0.10183	0.203174	0.172581	0.320074	0.231921	0.24475	0.115338	0.0143097	0.065768	0.0219393	0.0911239	0.00539833	0.0149295	0.00621799	0.0206134	0.0191526	0.0134603	0.0327518
21026	Discomfort/pain occurring only during menstrual bleed	49827	-1.66009	1	1	1	1	1	1	1	1	1	1	1	0.0688742	0.0503405	0.113483	0.123228	0.0993896	0.0656898	0.0389797	0.137367	0.0385889	0.16534	0.0808944
21027	Abdominal discomfort/pain for 6 months or longer	49827	0.406162	0.164975	0.203993	0.240136	0.108873	0.257787	0.165826	0.209845	0.140605	0.151719	0.103862	0.16872	0.130288	0.170938	0.169978	0.0473187	0.276718	0.181896	0.265755	0.280931	0.248607	0.151292	0.0966166
21028	Frequency of discomfort/pain getting better or stopping after a bowel movement	49827	-0.14704	0.00353828	0.00491169	0.0167792	0.00334361	0.0297301	0.00213836	0.00178411	0.0818478	0.000300701	0.00192331	0.029392	0.0110651	0.00429818	0.0020615	0.00214205	0.0678163	0.011897	0.0252933	0.0843262	0.00700907	0.0221727	0.00400204
21029	More frequent bowel movements when abdominal discomfort/pain started	49827	-0.322244	0.0523903	0.0357823	0.0501509	0.0425272	0.174991	0.0589241	0.0598129	0.154672	0.109918	0.163848	0.0114556	1.54225e-05	0.00634085	1.37018e-06	1.00041e-07	1.28107e-06	1.13459e-06	8.61602e-06	2.77804e-09	7.64836e-05	7.49249e-06	0.000195615
21030	Less frequent bowel movements when abdominal discomfort/pain started	49827	0.26694	0.416163	0.50984	0.274868	0.233116	0.299417	0.410481	0.352886	0.119155	0.485436	0.318945	0.161534	0.000622175	0.000391375	0.000860721	0.00209947	0.00059474	0.000407334	0.00144298	0.00230587	0.000989375	0.00178851	0.000159502
21031	Stools looser when abdominal discomfort/pain started	49827	-0.271921	0.113676	0.0288539	0.0772484	0.0861941	0.182359	0.0771158	0.0496596	0.0934092	0.0431973	0.184058	0.100714	7.09462e-05	0.0254179	1.95769e-05	3.98795e-07	6.07019e-06	1.08836e-05	5.76067e-06	9.52178e-09	0.000632329	1.01272e-05	1.04122e-05
21032	Frequency of harder stools when abdominal discomfort/pain started	49827	0.278788	0.263963	0.191131	0.29307	0.0597588	0.170006	0.293873	0.19488	0.0165906	0.206737	0.213386	0.168922	0.00019731	8.0435e-05	0.00065374	0.00241405	0.000574943	0.000193805	9.21309e-05	0.00143503	0.000513446	0.000455702	8.79232e-05
21033	Frequency of hard/lumpy stools in the last 3 months	80946	0.345882	0.000610266	0.000580658	0.00085259	0.00123535	0.00314613	0.000164487	0.000972797	0.0230992	0.00233965	0.000941319	1.48258e-05	4.66714e-15	5.73215e-15	3.35031e-13	2.24711e-14	7.46736e-11	1.01238e-16	6.80838e-17	3.34445e-06	1.35489e-14	7.15715e-14	9.15154e-20
21034	Frequency of loose/mushy/watery stools in the last 3 months	80946	-1.36389	2.55117e-06	1.62719e-08	4.25417e-07	2.27689e-06	3.30136e-05	4.98339e-06	2.4641e-06	0.0613509	9.83761e-06	9.83713e-05	1.44954e-07	0.00278985	8.18187e-05	0.00388648	0.00186243	0.00058226	0.00525399	0.00228959	9.05219e-07	0.00346082	0.00249173	0.000206825
21035	Currently (in last 3 months) suffer from abdominal pain	80946	0.641181	0.183697	0.252818	0.263506	0.308775	0.159755	0.15222	0.134276	0.193717	0.130416	0.217735	0.0982209	0.00753989	0.00253728	0.00822127	0.0563975	0.0512853	0.0230941	0.0215045	0.0023457	0.0156395	0.00821941	0.00356677
21036	Severity of current abdominal pain	28735	0.320436	0.0474667	0.0617948	0.0336615	0.0180082	0.0851727	0.0710142	0.0364551	0.122207	0.0428988	0.0750344	0.0240629	0.359652	0.600881	0.447487	0.105469	0.0973994	0.199285	0.528766	0.331524	0.544208	0.331571	0.486684
21037	Number of days (out of 10) with abdominal pain	28735	0.510032	0.368114	0.527864	0.301906	0.489773	0.392106	0.448293	0.57364	0.434115	0.162062	0.461973	0.140481	0.0555048	0.043055	0.108995	0.160832	0.0171654	0.0300491	0.0750674	0.185115	0.0807038	0.0874733	0.0323961
21038	Currently suffer from abdominal distension	80946	0.516132	0.304658	0.310568	0.235441	0.48831	0.311651	0.282044	0.322638	0.476329	0.232613	0.376844	0.399253	0.027162	0.0163669	0.0312141	0.0806872	0.00236528	0.044167	0.0895807	0.168997	0.0216228	0.0166701	0.081514
21039	Severity of current abdominal distension/tightness	24953	0.773264	0.126842	0.0449376	0.240155	0.158375	0.0801986	0.102802	0.0300794	0.393773	0.169684	0.0919554	0.216932	0.0626622	0.0552855	0.0521136	0.0565986	0.0357948	0.075959	0.0349138	0.311114	0.0590591	0.0554233	0.115654
21040	Satisfaction with bowel habits	80946	0.366809	0.0167189	0.0462819	0.00723674	0.0170255	0.012278	0.0203751	0.014194	0.0854819	0.0110517	0.00330711	0.00115573	0.0395375	0.0216027	0.0663963	0.0220518	0.040714	0.0640041	0.0565808	0.294564	0.0407847	0.031057	0.0597709
21041	Degree to which abdominal pain/discomfort/altered bowel habits affect/interfere with life in general	80946	-0.391468	0.000582015	0.00694692	0.000605863	0.000826417	0.000212224	0.000419865	0.000393251	0.00283185	0.00151365	0.00032353	0.0179784	0.0569664	0.0212969	0.0296521	0.0226719	0.0418193	0.0389971	0.0306343	0.000741584	0.0923392	0.0684473	0.18631
21042	Greatest number of times bowels opened per day	80416	-0.0268911	0.551968	0.30384	0.853057	0.766487	0.143598	0.606492	0.274931	0.000125528	0.337372	0.182503	0.265726	0.0349677	0.638433	0.0544183	0.00698873	0.000839448	0.043663	0.118441	7.81767e-08	0.0559592	0.0387741	0.267619
21043	Least number of times bowels opened per week	79774	-0.0936024	3.0749e-07	0.000211888	1.64029e-05	1.91549e-05	3.13071e-07	1.89059e-07	1.10762e-08	2.70829e-11	1.44618e-06	1.06115e-07	7.42336e-05	2.56177e-13	1.23479e-09	1.78535e-11	3.48017e-13	2.16841e-14	1.37811e-14	7.83829e-13	1.0172e-16	3.46043e-10	7.58497e-14	5.24217e-12
21044	Average number of times bowels opened per day	80173	-0.116141	3.33785e-09	0.00137812	2.22135e-07	6.31419e-07	2.9449e-11	1.01316e-08	9.81992e-12	7.22713e-21	9.36646e-10	2.20625e-11	2.00759e-06	9.10582e-20	9.73732e-10	2.34158e-17	1.61551e-22	1.63017e-26	6.79851e-21	1.34638e-18	7.12623e-35	1.3966e-17	4.87789e-21	1.0603e-15
21045	Number of weeks absent from work due to IBS, in the last year	12796	0.0409752	0.97846	0.609086	0.93834	0.839267	0.316002	0.978457	0.863236	0.460931	0.862499	0.805566	0.958474	0.203379	0.313041	0.11744	0.0515873	0.524858	0.174566	0.174262	0.0292225	0.301443	0.268469	0.842934
21046	When gave up work due to IBS	150	0	1	1	1	1	1	1	1	1	1	1	1	1	1	1	1	1	1	1	1	1	1	1
21047	Number of weeks (in the last year) at work suffering because of IBS	4743	0.0567914	0.61881	0.807755	0.353129	0.440675	0.681671	0.570145	0.466295	0.670686	0.635257	0.645122	0.920626	0.27628	0.860178	0.348642	0.300841	0.0870046	0.338189	0.0987719	0.83324	0.20567	0.267045	0.276598
21048	Degree bothered by back pain in the past 3 months	80946	0.0979295	6.51762e-10	3.49851e-08	1.85281e-11	1.98513e-12	8.95777e-10	9.98396e-10	1.47427e-11	4.97611e-05	2.12024e-11	1.45323e-10	2.30943e-12	0.000433642	9.54526e-06	0.000371885	0.00047876	6.1347e-05	0.000737865	0.000175536	1.48773e-10	0.000322889	0.0015174	1.12861e-05
21049	Degree bothered by pain in arms/legs/joints in the past 3 months	80946	-0.111984	0.0118528	0.00818373	0.00131187	0.00909503	0.00426543	0.00800165	0.00637075	0.00117356	0.00277087	0.00978615	0.0021136	0.00217428	0.0111657	6.90163e-05	0.000271523	0.00226084	0.0016819	3.26934e-05	3.00901e-20	0.00799408	0.00380008	0.0009144
21050	Degree bothered by menstrual cramps or other problems with period in the last 3 months	80946	0.0586654	1	1	1	1	1	1	1	1	1	1	1	0.0446993	0.079159	0.0226368	0.0085317	0.293199	0.0820594	0.0413345	7.43024e-07	0.119442	0.0426368	0.357396
21051	Degree bothered by headaches in the last 3 months	80946	0.673129	2.18128e-24	1.66499e-26	1.03644e-23	1.29707e-26	4.96641e-18	2.77427e-26	6.89863e-25	4.88958e-17	1.12584e-26	4.57788e-24	2.13937e-19	4.60017e-35	5.07993e-48	4.35031e-32	8.6398e-35	3.63268e-28	4.98524e-36	4.50959e-34	2.77837e-24	2.9133e-37	8.1884e-32	9.20673e-16
21052	Degree bothered by chest pain in the last 3 months	80946	-0.0757598	0.0469598	0.334909	0.0551752	0.0264124	0.783708	0.0475431	0.0430934	1.56116e-07	0.0282405	0.0184055	0.000175584	0.0522428	0.452506	0.0258861	0.00101582	0.114886	0.0371828	0.0234214	4.51802e-07	0.220079	0.00390931	0.00525959
21053	Degree bothered by dizziness in the last 3 months	80946	0.105187	0.00649328	0.0137791	0.0105577	0.0034809	0.00347049	0.00191738	0.00171789	0.0909125	0.00301731	0.00535617	0.113464	0.00025085	6.65234e-08	0.00177766	0.000819433	3.1248e-05	0.000768462	0.000316228	0.00287285	8.29401e-05	0.00107445	0.00444773
21054	Degree bothered by fainting spells in the last 3 months	80946	-0.911869	0.104619	0.170088	0.154428	0.0563194	0.117237	0.124432	0.0394388	0.0279379	0.144809	0.0334229	0.187632	0.00437349	0.00519188	0.00367975	0.00410373	0.00460307	0.00178857	0.00913771	0.0054729	0.00211316	0.00213391	0.0151185
21055	Degree bothered by feeling heart pound/race in the last 3 months	80946	-1.40413	0.202981	0.182439	0.157771	0.122784	1.3565e-05	0.21295	0.161212	0.00110944	0.18946	0.216932	0.187772	0.0119107	0.000527858	0.0229618	0.0073793	1.2058e-10	0.0371823	0.0185098	0.000672149	0.00838461	0.0116324	0.0167043
21056	Degree bothered by shortness of breath in the last 3 months	80946	-0.551595	6.35689e-11	0.000444423	3.10983e-10	3.34359e-12	3.50289e-10	5.78256e-11	8.45526e-11	1.36599e-27	8.7004e-10	3.86812e-12	7.6358e-25	5.37984e-17	0.0375349	2.90581e-19	8.24499e-19	4.86939e-18	1.73084e-21	6.57279e-18	8.54851e-44	7.70495e-17	5.13298e-18	1.29948e-23
21057	Degree bothered by pain/problems during intercourse in the last 3 months	80946	-0.388259	5.04213e-08	2.57195e-07	1.83164e-08	2.59488e-08	3.54699e-08	1.29123e-07	8.03722e-10	4.61622e-09	7.72749e-08	6.04497e-06	9.50283e-08	6.67167e-07	3.43546e-06	7.80365e-08	2.66799e-06	0.000384814	1.84658e-06	6.23261e-09	1.16789e-06	9.72946e-08	2.31909e-07	2.14151e-05
21058	Degree bothered by urinary frequency/bladder irritability in the last 3 months	80946	-0.676026	0.000555299	1.42243e-05	1.13183e-05	0.000625828	0.00687854	0.000699333	0.000751442	0.00133775	0.00159722	0.000690352	1.0427e-05	0.0948878	0.000212453	0.130257	0.108036	0.100599	0.0572155	0.0750001	0.00125673	0.13053	0.0970834	0.0104749
21059	Degree bothered by nausea in the last 3 months	80946	0.0761291	0.010747	0.0500482	0.0235058	0.00312413	0.0047648	0.0209781	0.00269395	0.00861534	0.0226129	0.00413028	0.011715	0.0226069	2.66414e-06	0.0273784	0.00766226	0.00687243	0.0114088	0.0420262	0.00570592	0.0247437	0.0182629	0.0287594
21060	Degree bothered by feeling tired all the time in the last 3 months	80946	0.285495	2.03537e-20	2.27297e-27	1.49172e-22	1.18947e-19	9.56953e-20	2.56398e-21	1.86108e-19	0.070804	2.1326e-19	7.86473e-20	5.29221e-24	1.04657e-14	1.98733e-30	1.29657e-11	2.2705e-13	2.63975e-16	1.15852e-14	1.33818e-15	4.06427e-13	2.14992e-15	1.91104e-12	1.39784e-22
21061	Degree bothered by trouble sleeping in the last 3 months	80946	0.372198	3.99544e-12	1.1885e-12	1.98677e-12	3.63783e-10	9.13622e-11	2.84044e-12	4.72043e-12	6.08586e-08	4.60939e-12	2.93691e-10	3.63952e-12	4.00455e-24	2.53818e-24	8.18254e-21	3.42052e-19	2.84469e-28	1.35391e-24	3.85702e-22	8.41737e-06	3.77761e-25	2.84009e-19	3.53624e-32
21062	Ever been offered/sought treatment for anxiety	80946	0.728665	0.240147	0.205397	0.395913	0.103979	0.204236	0.279212	0.261481	0.89634	0.344864	0.233697	0.207987	0.000978343	0.00118973	0.00153817	0.00166916	0.00194224	0.00125945	0.00362564	0.00566939	0.000997672	0.000803014	0.000145632
21063	Ever been offered/sought treatment for depression	80946	0.291729	0.0131798	0.0151026	0.0223398	0.0151333	0.00946467	0.0207722	0.0117374	0.120069	0.0309842	0.0140925	0.0234453	0.153511	0.0204257	0.14451	0.121217	0.267727	0.355326	0.221203	0.840972	0.0866965	0.145151	0.0347366
21064	Sensitive stomach	80946	-1.93866	0.111502	0.0276674	0.221045	0.0833802	0.203582	0.145248	0.223606	0.473867	0.105818	0.0794532	0.0529718	0.00339173	0.00258893	0.00280305	0.00349883	0.00530085	0.00308678	0.0140588	0.0473972	0.00499255	0.00360891	0.000476995
21065	Family history of IBS	80946	-0.148589	6.37381e-05	4.36729e-06	2.46402e-05	4.33825e-05	0.000828725	0.000109027	2.27274e-05	0.072531	0.000261219	0.000204495	9.24687e-06	8.89398e-05	1.20443e-07	0.000115921	0.00144621	0.00228314	0.000101402	0.00149888	0.286445	1.75806e-05	0.000553581	5.2858e-06
21066	Born by caesarian section	80946	0.211791	0.000463876	0.0353606	0.000260018	0.000274521	2.57805e-05	0.000721095	0.000436603	0.000441224	8.38596e-05	0.00434385	2.32984e-07	0.00709186	0.00495441	0.00491912	0.00344074	0.0021842	0.00224703	0.0143057	0.0051142	0.00638245	0.00224353	0.00181635
21067	Long-term/recurrent antibiotics as child or teenager	80946	-4.30349	0.0924786	0.153366	0.069125	0.155906	0.25571	0.0704377	0.0532262	0.0157011	0.10341	0.174522	0.018099	0.00357474	0.000937172	0.00784026	0.0102728	0.0157421	0.00602879	0.00288008	4.65949e-05	0.00127243	0.00351102	0.00186214
21068	Diagnosed with coeliac disease or gluten sensitivity	80946	0.36773	0.473661	0.385411	0.38284	0.292356	0.403585	0.473259	0.477575	0.1345	0.524166	0.380735	0.153151	0.0493933	0.0524808	0.0418886	0.0636441	0.0370898	0.0297498	0.0185861	0.0183	0.279688	0.05977	0.0552085
21069	Method of coeliac disease/gluten sensitivity diagnosis	1886	-0.586914	0.159996	0.176392	0.141643	0.0534689	0.205743	0.201234	0.0723256	0.135562	0.0591855	0.0966416	0.0867683	0.0174284	0.0466739	0.0215326	0.0218056	0.0144978	0.00730339	0.00246084	0.0083257	0.00695354	0.0238928	0.0270116
21070	Speed of onset of IBS symptoms	12894	-0.864204	0.38944	0.457002	0.20852	0.378763	0.480204	0.339818	0.292564	0.476699	0.374194	0.358442	0.25308	0.137377	0.0585163	0.136542	0.224047	0.144012	0.104434	0.0390785	0.249495	0.137747	0.135699	0.0597539
21071	Infectious illness diagnosis status when IBS symptoms first began	12894	-0.363972	0.666358	0.362419	0.416996	0.695324	0.897747	0.838656	0.525513	0.874351	0.660572	0.455826	0.478851	0.0502788	0.0298796	0.0453917	0.0415777	0.0646189	0.06829	0.0828196	0.158953	0.0220824	0.0556098	0.224139
21072	Infection diagnosed alongside IBS when IBS symptoms began	1269	6.83284	0.123844	0.276766	0.139752	0.0548382	0.0612987	0.190529	0.118436	0.0724874	0.135228	0.104225	0.142038	0.0643128	0.0514806	0.0776754	0.414902	0.0434523	0.0840357	0.0618576	0.0875884	0.112686	0.0672631	0.0298755
21073	Fever when IBS symptoms first began	12894	-0.459666	0.296058	0.168407	0.164654	0.284899	0.239294	0.303429	0.225638	0.543851	0.401255	0.280696	0.503517	0.0123039	0.0131007	0.0123161	0.0166973	0.0104208	0.0152099	0.0437319	0.0573321	0.00180611	0.0146409	0.0635283
21074	Diarrhoea when IBS symptoms first began	12894	-0.609416	0.365577	0.350488	0.230647	0.303831	0.472091	0.35326	0.279008	0.310301	0.392939	0.26039	0.359318	0.00141495	0.00837925	0.000974324	0.000227593	0.00163208	0.00108816	0.0065228	0.00471493	0.000486796	0.000850112	0.00822443
21075	Bloody diarrhoea when IBS symptoms first began	6452	0.788489	0.575361	0.469254	0.487841	0.657131	0.383693	0.563088	0.43695	0.655289	0.487543	0.838889	0.235833	0.281297	0.269049	0.363078	0.139593	0.33935	0.339334	0.349886	0.414619	0.26109	0.390286	0.340228
21076	Vomiting when IBS symptoms first began	12894	-0.440007	0.368918	0.517	0.507861	0.365099	0.704539	0.303793	0.579341	0.182658	0.266383	0.52478	0.315676	0.0724997	0.0460118	0.0334321	0.0418387	0.0569816	0.0665413	0.111357	0.128713	0.0324081	0.0606281	0.159351
4246	Time to press last digit (right)	67392	-0.2349	4.03035e-61	3.17121e-64	1.03824e-66	7.34399e-63	3.47367e-58	1.54014e-63	3.01504e-62	4.64706e-15	4.31681e-62	4.86587e-64	1.18651e-83	1.54775e-58	3.63322e-67	3.58403e-59	2.28105e-60	1.60849e-63	2.61531e-60	1.22511e-61	2.2648e-16	2.85286e-61	1.80243e-56	1.24385e-60
22000	Genotype measurement batch	488278	0	1	1	1	1	1	1	1	1	1	1	1	1	1	1	1	1	1	1	1	1	1	1
22001	Genetic sex	215945	0.615606	9.68632e-32	3.76484e-24	2.36322e-34	1.05091e-29	1.21577e-37	1.40449e-29	2.33246e-31	1.91037e-29	1.07672e-22	2.79697e-31	3.24307e-32	0.0769781	0.807477	0.00250253	0.000618241	0.0646456	0.202003	0.306229	0.00911547	0.133467	0.275105	0.190557
22002	CEL files	488278	0	1	1	1	1	1	1	1	1	1	1	1	1	1	1	1	1	1	1	1	1	1	1
22003	Heterozygosity	215945	0.0243593	1.55976e-05	3.16181e-06	6.61078e-06	1.76888e-05	2.35269e-07	0.000117559	1.376e-06	0.000658341	1.44991e-06	3.52663e-05	3.0129e-05	0.00298374	0.000477975	0.00140989	0.0642538	0.00100511	0.00213488	0.000886036	0.00207471	0.000807766	0.00643801	0.00357727
22004	Heterozygosity, PCA corrected	215945	0.0206985	7.9648e-06	2.59389e-06	9.66263e-06	8.5842e-06	5.54515e-08	6.00641e-05	8.07044e-07	0.00123582	1.05588e-06	2.71051e-05	2.14043e-05	0.011631	0.00366774	0.00889616	0.0829666	0.00456804	0.00932999	0.00640885	0.0244585	0.00452236	0.0256756	0.00997781
22005	Missingness	215945	0.0114841	0.015897	0.240653	0.0189907	0.0464538	0.0095421	0.022786	0.0201658	0.00830153	0.00338963	0.0268579	0.00225069	0.161541	0.880016	0.191476	0.151436	0.0540426	0.213842	0.30826	0.0809337	0.135927	0.064551	0.0769985
22006	Genetic ethnic grouping	204981	0	1	1	1	1	1	1	1	1	1	1	1	1	1	1	1	1	1	1	1	1	1	1
22007	Genotype measurement plate	488278	0	1	1	1	1	1	1	1	1	1	1	1	1	1	1	1	1	1	1	1	1	1	1
22008	Genotype measurement well	488278	0	1	1	1	1	1	1	1	1	1	1	1	1	1	1	1	1	1	1	1	1	1	1
22009	Genetic principal components	215945	0.0202119	2.81453e-10	4.78916e-07	0.1823	2.00694e-08	2.94909e-15	1.39932e-08	1.20543e-08	3.95647e-15	2.53476e-09	6.43054e-08	0.020938	0.0137462	0.50198	0.968654	0.636363	2.46522e-07	0.0046529	0.196348	0.172859	0.0112552	0.00760388	0.84625
22010	Recommended genomic analysis exclusions	173	0	1	1	1	1	1	1	1	1	1	1	1	1	1	1	1	1	1	1	1	1	1	1
22011	Genetic relatedness pairing	8456	0.0408004	0.773306	0.878005	0.64546	0.706996	0.815531	0.597864	0.94708	0.833156	0.815259	0.551443	0.475177	0.339381	0.489397	0.212455	0.188614	0.348215	0.37704	0.660745	0.343936	0.291119	0.634706	0.255207
22012	Genetic relatedness factor	8456	0.0794474	0.944608	0.960381	0.740658	0.856144	0.933141	0.832119	0.715476	0.883956	0.98054	0.502285	0.316903	0.0628154	0.0987428	0.0445775	0.0853317	0.0462861	0.0511841	0.0409739	0.0172714	0.091431	0.128593	0.0559395
22013	Genetic relatedness IBS0	8456	-0.0515154	0.607856	0.752986	0.963582	0.572633	0.607575	0.515478	0.409137	0.802649	0.754341	0.299317	0.607086	0.227697	0.267786	0.17697	0.277408	0.178957	0.260633	0.141632	0.0935155	0.310782	0.349892	0.24201
22018	Genetic relatedness exclusions	320	1.99523	0.59172	0.956712	0.50849	0.561755	0.370518	0.659529	0.612104	0.706804	0.66878	0.672012	0.465671	0.59377	0.423948	0.733229	0.151128	0.620881	0.542938	0.795367	0.328629	0.734175	0.605396	0.879339
22019	Sex chromosome aneuploidy	227	0	1	1	1	1	1	1	1	1	1	1	1	1	1	1	1	1	1	1	1	1	1	1
22020	Used in genetic principal components	177439	0	1	1	1	1	1	1	1	1	1	1	1	1	1	1	1	1	1	1	1	1	1	1
22021	Genetic kinship to other participants	215945	-5.15269	0.863448	0.851242	0.926561	0.735178	0.810391	0.678835	0.834601	0.754236	0.776068	0.581434	0.94972	0.179177	0.21115	0.138134	0.100042	0.1898	0.188557	0.238367	0.331981	0.147307	0.21641	0.141031
22022	Sex inference X probe-intensity	215945	-0.0537305	2.8444e-07	0.016206	8.75951e-07	1.78738e-07	1.90181e-07	5.32442e-07	3.11114e-08	1.1044e-08	6.00873e-07	2.50214e-08	1.47255e-10	5.7525e-11	0.0157286	4.54392e-10	5.67009e-12	1.98924e-10	1.42176e-13	4.28397e-09	3.40897e-14	5.5621e-12	1.60737e-10	2.27556e-12
22023	Sex inference Y probe-intensity	215945	-0.0658998	1.62403e-06	0.048811	6.2446e-06	1.40993e-06	1.93304e-06	4.55946e-06	1.73763e-07	6.17975e-08	1.53912e-06	1.76644e-07	1.03797e-09	9.4555e-16	0.000999402	2.93774e-14	8.1334e-16	3.00431e-15	1.23293e-19	1.31237e-13	3.53591e-19	2.09694e-17	1.42314e-15	3.95343e-18
22024	DNA concentration	215945	0.00872577	1.67096e-24	2.5794e-17	6.5677e-31	2.61516e-36	1.43967e-28	1.32082e-34	3.16369e-30	1.33053e-27	2.08786e-23	3.24792e-27	2.70468e-26	0.287481	0.000144032	0.169452	0.639203	0.342014	1.31155e-48	0.0137188	0.0115691	0.666128	0.259122	0.250144
22025	Affymetrix quality control metric "Cluster.CR"	215945	0.0168145	0.76439	0.738955	0.749307	0.418695	0.836267	0.613062	0.752573	0.581058	0.847242	0.499747	0.877404	0.0403955	0.0490532	0.036344	0.0608341	0.114398	0.0108199	0.0236286	0.0958795	0.0350512	0.0888442	0.067356
22026	Affymetrix quality control metric "dQC"	215945	0.0412269	0.00347799	0.737235	0.000947464	0.00027476	0.00163901	0.00206656	0.00940172	0.0033252	0.00119101	0.00322252	0.000331758	5.01679e-07	0.000148762	9.0159e-08	1.07231e-06	4.66589e-07	7.99802e-08	2.49904e-06	1.18658e-05	2.14074e-06	7.6383e-07	8.52267e-08
22027	Outliers for heterozygosity or missing rate	0	0	1	1	1	1	1	1	1	1	1	1	1	1	1	1	1	1	1	1	1	1	1	1
22028	Use in phasing Chromosomes 1-22	215945	0	1	1	1	1	1	1	1	1	1	1	1	1	1	1	1	1	1	1	1	1	1	1
22029	Use in phasing Chromosome X	215945	2.0267	4.16249e-41	3.05754e-26	2.56018e-36	9.48941e-39	5.46353e-47	5.11943e-36	4.49887e-40	5.58735e-32	1.83672e-33	3.80158e-40	4.73064e-47	1.18143e-15	5.14156e-13	3.27754e-14	3.61504e-13	3.91063e-16	2.75511e-13	2.93492e-17	3.54353e-12	1.69251e-17	9.26477e-16	3.77423e-15
22030	Use in phasing Chromosome XY	215945	1.65714	2.63876e-30	3.93547e-20	7.44535e-28	1.71282e-30	1.40471e-34	1.73109e-27	1.01013e-29	2.43554e-25	2.86107e-24	7.74651e-31	2.83832e-33	2.46089e-12	2.41438e-11	4.25088e-11	3.49209e-10	8.45479e-13	1.19395e-10	1.09061e-13	9.20983e-09	4.27373e-14	1.46032e-12	3.80182e-12
22032	IPAQ activity group	168019	-0.147508	1.74915e-05	2.59935e-13	5.45468e-13	9.92686e-08	6.13406e-05	2.00879e-05	2.52905e-05	8.28823e-13	7.61488e-07	1.22364e-12	0.322	8.65181e-09	3.72338e-19	5.00239e-09	3.86225e-11	3.4172e-09	6.73301e-08	3.1209e-11	1.34627e-09	8.94495e-09	1.11612e-08	2.49962e-27
22033	Summed days activity	173775	-0.109784	5.46305e-12	5.63804e-31	6.11899e-25	8.39525e-15	1.0679e-12	4.39915e-08	7.68473e-15	1.79574e-34	2.39911e-17	4.91541e-27	0.0423989	8.43984e-34	5.71212e-51	3.02402e-35	9.57283e-42	3.17538e-42	6.66922e-28	1.74976e-37	1.30399e-45	4.70958e-33	7.85997e-33	1.53631e-43
22034	Summed minutes activity	168019	0.00172624	1.24095e-08	1.64658e-06	0.000564782	4.24669e-06	3.66631e-08	1.46195e-15	1.11085e-06	9.73781e-05	2.82634e-06	0.0106799	0.649791	0.851416	0.14489	0.458364	0.707198	0.92476	0.235576	0.548272	0.000455514	0.220176	0.379802	4.57293e-78
22035	Above moderate/vigorous recommendation	402391	0	1	1	1	1	1	1	1	1	1	1	1	1	1	1	1	1	1	1	1	1	1	1
22036	Above moderate/vigorous/walking recommendation	402279	0	1	1	1	1	1	1	1	1	1	1	1	1	1	1	1	1	1	1	1	1	1	1
22037	MET minutes per week for walking	168019	-0.00659588	5.02877e-05	7.08134e-29	0.0503217	0.000776745	0.000217753	5.08986e-09	0.00198833	0.0699732	0.00205769	0.147575	9.75825e-71	0.47417	0.0796232	0.562295	0.251038	0.527219	0.782878	0.373775	0.630083	0.748685	0.722696	2.75676e-128
22038	MET minutes per week for moderate activity	168019	-0.130559	3.85687e-78	2.18313e-95	1.5301e-100	6.40169e-95	6.77435e-93	8.89506e-63	2.48032e-92	1.38399e-121	3.15544e-94	4.29338e-114	5.25045e-20	1.38564e-45	3.2395e-60	1.09881e-43	2.06512e-56	3.63137e-56	5.42224e-45	2.08561e-47	1.86439e-38	2.1762e-41	1.83744e-41	4.61511e-69
22039	MET minutes per week for vigorous activity	168019	0.0659911	5.03148e-167	6.43641e-85	3.82478e-154	1.54811e-172	3.4952e-175	9.64177e-197	1.01012e-161	6.3196e-158	4.88764e-165	1.16769e-141	1.28849e-173	8.00005e-13	1.18335e-12	1.57281e-15	1.25445e-16	2.59395e-13	6.67975e-16	3.70399e-16	6.94996e-19	4.15221e-15	4.95e-14	2.14641e-13
22040	Summed MET minutes per week for all activity	168019	-0.0392231	3.99217e-10	1.45621e-05	0.000119738	8.27207e-08	1.30266e-08	6.11585e-19	6.83444e-07	0.00259643	5.72181e-07	0.011393	0.0157016	2.0797e-05	7.12928e-09	0.000199669	1.66575e-06	7.82106e-07	0.000649936	4.64324e-05	0.0137935	0.00051992	0.000295119	2.60837e-106
22051	UKBiLEVE genotype quality control for samples	21804	0.271149	0.0255046	0.126911	0.0175347	0.0129404	0.00911716	0.0454076	0.0169652	0.0563377	0.027435	0.0292169	0.03457	0.356331	0.374003	0.457719	0.345895	0.241292	0.191789	0.145504	0.906923	0.348172	0.308274	0.174528
22052	UKBiLEVE unrelatedness indicator	21804	0.277	0.0254477	0.128078	0.01746	0.0129332	0.00902172	0.0453119	0.0169177	0.0569248	0.0270983	0.0289591	0.0342278	0.346044	0.366825	0.445859	0.334644	0.235334	0.184652	0.140976	0.344811	0.306329	0.298219	0.167453
22100	Chromosome XY genotype results	488278	0	1	1	1	1	1	1	1	1	1	1	1	1	1	1	1	1	1	1	1	1	1	1
22101	Chromosome 1 genotype results	488278	0	1	1	1	1	1	1	1	1	1	1	1	1	1	1	1	1	1	1	1	1	1	1
22102	Chromosome 2 genotype results	488278	0	1	1	1	1	1	1	1	1	1	1	1	1	1	1	1	1	1	1	1	1	1	1
22103	Chromosome 3 genotype results	488278	0	1	1	1	1	1	1	1	1	1	1	1	1	1	1	1	1	1	1	1	1	1	1
22104	Chromosome 4 genotype results	488278	0	1	1	1	1	1	1	1	1	1	1	1	1	1	1	1	1	1	1	1	1	1	1
22105	Chromosome 5 genotype results	488278	0	1	1	1	1	1	1	1	1	1	1	1	1	1	1	1	1	1	1	1	1	1	1
22106	Chromosome 6 genotype results	488278	0	1	1	1	1	1	1	1	1	1	1	1	1	1	1	1	1	1	1	1	1	1	1
22107	Chromosome 7 genotype results	488278	0	1	1	1	1	1	1	1	1	1	1	1	1	1	1	1	1	1	1	1	1	1	1
22108	Chromosome 8 genotype results	488278	0	1	1	1	1	1	1	1	1	1	1	1	1	1	1	1	1	1	1	1	1	1	1
22109	Chromosome 9 genotype results	488278	0	1	1	1	1	1	1	1	1	1	1	1	1	1	1	1	1	1	1	1	1	1	1
22110	Chromosome 10 genotype results	488278	0	1	1	1	1	1	1	1	1	1	1	1	1	1	1	1	1	1	1	1	1	1	1
22111	Chromosome 11 genotype results	488278	0	1	1	1	1	1	1	1	1	1	1	1	1	1	1	1	1	1	1	1	1	1	1
22112	Chromosome 12 genotype results	488278	0	1	1	1	1	1	1	1	1	1	1	1	1	1	1	1	1	1	1	1	1	1	1
22113	Chromosome 13 genotype results	488278	0	1	1	1	1	1	1	1	1	1	1	1	1	1	1	1	1	1	1	1	1	1	1
22114	Chromosome 14 genotype results	488278	0	1	1	1	1	1	1	1	1	1	1	1	1	1	1	1	1	1	1	1	1	1	1
22115	Chromosome 15 genotype results	488278	0	1	1	1	1	1	1	1	1	1	1	1	1	1	1	1	1	1	1	1	1	1	1
22116	Chromosome 16 genotype results	488278	0	1	1	1	1	1	1	1	1	1	1	1	1	1	1	1	1	1	1	1	1	1	1
22117	Chromosome 17 genotype results	488278	0	1	1	1	1	1	1	1	1	1	1	1	1	1	1	1	1	1	1	1	1	1	1
22118	Chromosome 18 genotype results	488278	0	1	1	1	1	1	1	1	1	1	1	1	1	1	1	1	1	1	1	1	1	1	1
22119	Chromosome 19 genotype results	488278	0	1	1	1	1	1	1	1	1	1	1	1	1	1	1	1	1	1	1	1	1	1	1
22120	Chromosome 20 genotype results	488278	0	1	1	1	1	1	1	1	1	1	1	1	1	1	1	1	1	1	1	1	1	1	1
22121	Chromosome 21 genotype results	488278	0	1	1	1	1	1	1	1	1	1	1	1	1	1	1	1	1	1	1	1	1	1	1
22122	Chromosome 22 genotype results	488278	0	1	1	1	1	1	1	1	1	1	1	1	1	1	1	1	1	1	1	1	1	1	1
22123	Chromosome X genotype results	488278	0	1	1	1	1	1	1	1	1	1	1	1	1	1	1	1	1	1	1	1	1	1	1
22124	Chromosome Y genotype results	488278	0	1	1	1	1	1	1	1	1	1	1	1	1	1	1	1	1	1	1	1	1	1	1
22125	Mitochondrial genotype results	488278	0	1	1	1	1	1	1	1	1	1	1	1	1	1	1	1	1	1	1	1	1	1	1
22126	Doctor diagnosed hayfever or allergic rhinitis	121280	0	1	1	1	1	1	1	1	1	1	1	1	1	1	1	1	1	1	1	1	1	1	1
22127	Doctor diagnosed asthma	121280	0	1	1	1	1	1	1	1	1	1	1	1	1	1	1	1	1	1	1	1	1	1	1
22128	Doctor diagnosed emphysema	121280	0	1	1	1	1	1	1	1	1	1	1	1	1	1	1	1	1	1	1	1	1	1	1
22129	Doctor diagnosed chronic bronchitis	121280	0	1	1	1	1	1	1	1	1	1	1	1	1	1	1	1	1	1	1	1	1	1	1
22130	Doctor diagnosed COPD (chronic obstructive pulmonary disease)	121280	0	1	1	1	1	1	1	1	1	1	1	1	1	1	1	1	1	1	1	1	1	1	1
22131	Doctor diagnosed cystic fibrosis	121280	0	1	1	1	1	1	1	1	1	1	1	1	1	1	1	1	1	1	1	1	1	1	1
22132	Doctor diagnosed alpha-1 antitrypsin deficiency	121280	0	1	1	1	1	1	1	1	1	1	1	1	1	1	1	1	1	1	1	1	1	1	1
22133	Doctor diagnosed sarcoidosis	121280	0	1	1	1	1	1	1	1	1	1	1	1	1	1	1	1	1	1	1	1	1	1	1
22134	Doctor diagnosed bronchiectasis	121280	0	1	1	1	1	1	1	1	1	1	1	1	1	1	1	1	1	1	1	1	1	1	1
22135	Doctor diagnosed idiopathic pulmonary fibrosis	121280	0	1	1	1	1	1	1	1	1	1	1	1	1	1	1	1	1	1	1	1	1	1	1
22136	Doctor diagnosed fibrosing alveolitis/unspecified alveolitis	121280	0	1	1	1	1	1	1	1	1	1	1	1	1	1	1	1	1	1	1	1	1	1	1
22137	Doctor diagnosed tuberculosis	121280	0	1	1	1	1	1	1	1	1	1	1	1	1	1	1	1	1	1	1	1	1	1	1
22138	Doctor diagnosed silicosis	121280	0	1	1	1	1	1	1	1	1	1	1	1	1	1	1	1	1	1	1	1	1	1	1
22139	Doctor diagnosed asbestosis	121280	0	1	1	1	1	1	1	1	1	1	1	1	1	1	1	1	1	1	1	1	1	1	1
22140	Doctor diagnosed lung cancer (not mesothelioma)	121280	0	1	1	1	1	1	1	1	1	1	1	1	1	1	1	1	1	1	1	1	1	1	1
22141	Doctor diagnosed mesothelioma of the lung	121280	0	1	1	1	1	1	1	1	1	1	1	1	1	1	1	1	1	1	1	1	1	1	1
22146	Age hayfever or allergic rhinitis diagnosed by doctor	13012	0.0310069	0.437305	0.394744	0.445325	0.294168	0.121516	0.306163	0.371559	0.344433	0.619804	0.321274	0.0991795	0.316853	0.259143	0.474054	0.576775	0.11752	0.526386	0.313475	0.806667	0.159155	0.409514	0.0145274
22147	Age asthma diagnosed by doctor	7332	0.120734	0.236513	0.836743	0.0986804	0.36472	0.597992	0.270587	0.304499	0.432201	0.264761	0.308118	0.00295031	0.00493551	0.0556376	0.0166298	0.00953488	0.0156262	0.00438461	0.000382322	0.27228	0.00941872	0.0192948	1.33805e-06
22148	Age emphysema diagnosed by doctor	121	-0.260787	0.236506	0.262073	0.261703	0.144227	0.409963	0.285335	0.294576	0.432912	0.272601	0.159711	0.253826	0.479789	0.804374	0.337627	0.485605	0.412587	0.630907	0.533776	0.538046	0.297493	0.378306	0.534884
22149	Age chronic bronchitis diagnosed by doctor	631	-0.0634752	0.470638	0.295387	0.760554	0.558631	0.374631	0.373276	0.596424	0.808167	0.306706	0.256022	0.640229	0.671628	0.974242	0.735064	0.485963	0.670864	0.606171	0.957152	0.402152	0.822847	0.592198	0.997163
22150	Age COPD (Chronic Obstructive Pulmonary Disease) diagnosed by doctor	617	0.45239	0.427905	0.153554	0.363304	0.218401	0.423812	0.540254	0.562452	0.188457	0.768102	0.505688	0.380101	0.00755643	0.00121862	0.0106626	0.00388218	0.0261602	0.00219815	0.0100154	0.0322349	0.0142929	0.00899775	0.00266709
22151	Age cystic fibrosis diagnosed by doctor	NA	NA	1	1	1	1	1	1	1	1	1	1	1	2	2	2	2	2	2	2	2	2	2	2
22152	Age alpha-1 antitrypsin deficiency diagnosed by doctor	23	-0.284399	0.342331	0.62826	0.404443	0.532381	0.376196	0.372477	0.310255	0.151564	0.381107	0.350756	0.222259	0.764977	0.923776	0.803771	0.303526	0.735345	0.930663	0.918248	0.963078	0.541476	0.681132	0.97339
22153	Age sarcoidosis diagnosed by doctor	233	-0.634138	0.224135	0.247651	0.419326	0.0887278	0.0978874	0.208428	0.125008	0.413209	0.251995	0.205622	0.691806	0.00895893	0.0080492	0.0081824	0.056901	0.0537549	0.0096373	0.00541347	0.00339609	0.00536176	0.00726546	0.010938
22154	Age bronchiectasis diagnosed by doctor	516	0.405184	0.318868	0.374245	0.446043	0.488498	0.628983	0.382966	0.292109	0.474159	0.206911	0.221893	0.491213	0.0166895	0.0797604	0.0127732	0.00276857	0.0627601	0.00832499	0.00639531	0.0525046	0.0163423	0.0189964	0.0148443
22155	Age idiopathic pulmonary fibrosis diagnosed by doctor	40	-0.595474	0.92063	0.940386	0.898389	0.842508	0.967947	0.803169	0.998297	0.538613	0.622156	0.591225	0.853835	0.329022	0.569211	0.256034	0.337451	0.496688	0.477113	0.456001	0.301028	0.141855	0.292365	0.759076
22156	Age fibrosing alveolitis/unspecified alveolitis diagnosed by doctor	22	0.268337	0.753124	0.495522	0.932015	0.681322	0.407469	0.578992	0.941646	0.899527	0.914126	0.929516	0.463679	0.786427	0.67562	0.825718	0.886037	0.911267	0.67037	0.701803	0.896994	0.780056	0.86526	0.619188
22157	Age tuberculosis diagnosed by doctor	283	-0.165593	0.542741	0.346268	0.573008	0.840286	0.672778	0.579426	0.447665	0.264719	0.615825	0.637886	0.703095	0.446449	0.685165	0.425735	0.423069	0.39406	0.548909	0.601382	0.566994	0.588755	0.471097	0.197381
22158	Age silicosis diagnosed by doctor	NA	NA	0.51833	0.520646	0.327763	0.411103	0.775587	0.586976	0.426333	0.39193	0.494685	0.616118	0.819629	2	2	2	2	2	2	2	2	2	2	2
22159	Age asbestosis diagnosed by doctor	3	2.58636	0.364903	0.241285	0.461436	0.62174	0.302096	0.414832	0.305007	0.30852	0.43079	0.284498	0.48139	0.306964	0.12533	0.275689	0.632971	0.448917	0.250483	0.310682	0.12494	0.436655	0.326405	0.146955
22160	Age lung cancer (not mesothelioma) diagnosed by doctor	80	0.960168	0.120498	0.15308	0.119849	0.157017	0.116641	0.122807	0.133231	0.117904	0.155781	0.0837098	0.185016	0.00930412	0.0737569	0.00593045	0.0777237	0.00336403	0.0143704	0.000318637	0.00471845	0.0334105	0.0131492	0.0159926
22161	Age mesothelioma of the lung diagnosed by doctor	5	2.45168	0.156898	0.0840206	0.111512	0.201401	0.154156	0.0803703	0.284676	0.342439	0.295687	0.0754478	0.305766	0.294552	0.156787	0.302565	0.697254	0.387586	0.280234	0.2008	0.3122	0.333894	0.326517	0.197725
22166	Recent medication for hayfever or allergic rhinitis	27704	0	1	1	1	1	1	1	1	1	1	1	1	1	1	1	1	1	1	1	1	1	1	1
22167	Recent medication for asthma	15492	0	1	1	1	1	1	1	1	1	1	1	1	1	1	1	1	1	1	1	1	1	1	1
22168	Recent medication for emphysema	365	0	1	1	1	1	1	1	1	1	1	1	1	1	1	1	1	1	1	1	1	1	1	1
22169	Recent medication for chronic bronchitis	1383	0	1	1	1	1	1	1	1	1	1	1	1	1	1	1	1	1	1	1	1	1	1	1
22170	Recent medication for COPD (Chronic Obstructive Pulmonary Disease)	1768	0	1	1	1	1	1	1	1	1	1	1	1	1	1	1	1	1	1	1	1	1	1	1
22171	Recent medication for cystic fibrosis	9	0	1	1	1	1	1	1	1	1	1	1	1	1	1	1	1	1	1	1	1	1	1	1
22172	Recent medication for alpha-1 antitrypsin deficiency	48	0	1	1	1	1	1	1	1	1	1	1	1	1	1	1	1	1	1	1	1	1	1	1
22173	Recent medication for sarcoidosis	529	0	1	1	1	1	1	1	1	1	1	1	1	1	1	1	1	1	1	1	1	1	1	1
22174	Recent medication for bronchiectasis	1073	0	1	1	1	1	1	1	1	1	1	1	1	1	1	1	1	1	1	1	1	1	1	1
22175	Recent medication for idiopathic pulmonary fibrosis	108	0	1	1	1	1	1	1	1	1	1	1	1	1	1	1	1	1	1	1	1	1	1	1
22176	Recent medication for fibrosing alveolitis/unspecified alveolitis	46	0	1	1	1	1	1	1	1	1	1	1	1	1	1	1	1	1	1	1	1	1	1	1
22177	Recent medication for tuberculosis	654	0	1	1	1	1	1	1	1	1	1	1	1	1	1	1	1	1	1	1	1	1	1	1
22178	Recent medication for silicosis	8	0	1	1	1	1	1	1	1	1	1	1	1	1	1	1	1	1	1	1	1	1	1	1
22179	Recent medication for asbestosis	85	0	1	1	1	1	1	1	1	1	1	1	1	1	1	1	1	1	1	1	1	1	1	1
22180	Recent medication for lung cancer (not mesothelioma)	156	0	1	1	1	1	1	1	1	1	1	1	1	1	1	1	1	1	1	1	1	1	1	1
22181	Recent medication for mesothelioma of the lung	14	0	1	1	1	1	1	1	1	1	1	1	1	1	1	1	1	1	1	1	1	1	1	1
22182	HLA imputation values	488278	0	1	1	1	1	1	1	1	1	1	1	1	1	1	1	1	1	1	1	1	1	1	1
22200	Year of birth	55577	-0.12149	5.1253e-19	4.14733e-22	9.61916e-21	2.44435e-15	8.88317e-18	7.31988e-19	1.88092e-18	1.39695e-14	4.11723e-19	1.22582e-19	1.58161e-14	1.23378e-15	8.81498e-25	1.39572e-15	3.33919e-11	1.408e-16	6.85727e-16	2.44143e-21	1.07444e-09	1.14257e-21	5.81132e-16	2.02425e-09
22330	PQ interval	10176	0.115732	0.0798202	0.35473	0.0354485	0.014494	0.0449691	0.0659443	0.0812208	0.0846779	0.136449	0.0671156	0.013124	0.0014427	0.00672584	0.00271851	0.000328614	0.00506808	0.000202373	0.00153089	0.0011961	0.00247099	0.000972305	0.000691014
22331	QT interval	10658	0.128694	0.000489057	1.7509e-05	0.00278045	0.0303529	0.000448705	0.00104951	0.000484066	0.000167942	0.0210566	0.000650457	0.00138057	0.00028174	0.00336685	2.16021e-05	1.6017e-06	0.0884811	0.000276198	0.000479657	0.00023228	0.000227251	5.11819e-05	1.05043e-05
22332	QTC interval	10658	-0.0797839	0.171581	0.100037	0.100591	0.0407003	0.780823	0.120441	0.0743126	0.0400663	0.546437	0.177843	0.106713	0.0243889	0.0484831	0.013457	0.00174588	0.978407	0.00960067	0.00142546	0.0091023	0.0740598	0.0204832	0.0473721
22333	RR interval	10658	0.171727	0.0175128	0.00283644	0.0853104	0.450718	0.00033909	0.0423493	0.0400827	0.0315943	0.0711426	0.0198507	0.0462532	1.25313e-06	6.94142e-05	2.02156e-08	3.82718e-11	0.152572	3.21179e-07	5.01457e-08	3.68714e-07	7.57421e-06	1.1906e-07	1.04435e-07
22334	PP interval	10658	0.154244	0.130059	0.0141968	0.343828	0.852051	0.00741239	0.189346	0.199489	0.143282	0.299325	0.235132	0.369192	1.34221e-05	0.000280458	2.77675e-07	3.44149e-09	0.308049	5.33672e-06	7.30743e-07	1.24566e-06	5.0362e-05	2.177e-06	1.1956e-06
22335	P axis	10187	-0.00648884	0.797856	0.274642	0.962098	0.846464	0.684129	0.67354	0.84701	0.869568	0.91318	0.512363	0.97569	0.858156	0.212352	0.974377	0.784194	0.835014	0.790949	0.888631	0.668966	0.578263	0.715918	0.893098
22336	R axis	10658	0.0329786	0.11903	0.162753	0.0168261	0.0854548	0.10146	0.129998	0.201432	0.325057	0.120097	0.0720367	0.678143	0.352199	0.875437	0.29054	0.124919	0.185972	0.225155	0.17047	0.0510777	0.620273	0.470815	0.282076
22337	T axis	10658	-0.0168187	0.341189	0.716028	0.0763771	0.338034	0.716667	0.309462	0.264238	0.225696	0.674707	0.361628	0.123394	0.635177	0.724819	0.650413	0.971663	0.992897	0.769976	0.568601	0.46973	0.687947	0.583737	0.966411
22338	QRS num	10658	-0.172	0.0592988	0.0124249	0.22708	0.847426	0.00253558	0.112738	0.108002	0.0757574	0.178722	0.0814084	0.0707364	1.20536e-06	8.41113e-05	3.64542e-08	5.39601e-10	0.215158	3.16908e-07	1.58349e-07	1.49865e-07	1.25246e-06	1.44541e-07	1.74094e-08
22400	Liver iron (Fe)	506	-0.236633	0.178984	0.37613	0.162841	0.0603807	0.321879	0.19484	0.316409	0.143046	0.445376	0.137562	0.347375	0.129643	0.579208	0.0959671	0.12613	0.0933916	0.131777	0.0759624	0.0358714	0.186909	0.19517	0.17202
22401	Liver inflammation factor (LIF)	501	-0.15461	0.644259	0.616452	0.515394	0.461432	0.596452	0.636891	0.704664	0.873344	0.698763	0.753487	0.701231	0.323898	0.129242	0.336886	0.160197	0.367286	0.324475	0.681164	0.37909	0.311547	0.319439	0.197993
22402	Proton density fat fraction (PDFF)	2057	-0.242075	0.69369	0.218715	0.438011	0.742181	0.786193	0.736296	0.655199	0.917004	0.535021	0.424152	0.226803	0.00785975	0.0276213	0.00403296	0.00141988	0.0132479	0.00658831	0.0124302	0.000665932	0.0051327	0.00173199	0.00557171
22403	Anterior thigh lean muscle volume (right)	2628	0.275834	0.000180052	0.00078141	2.27746e-07	0.000206938	1.32238e-05	9.59678e-05	5.05687e-05	0.000244716	0.00110746	9.31031e-06	7.05657e-06	0.000447975	0.153265	2.36177e-05	0.000807761	0.000143908	0.000468871	0.000231955	1.17631e-05	6.96636e-05	2.71156e-06	7.04621e-05
22404	Posterior thigh lean muscle volume (right)	2628	0.460623	7.2838e-07	8.39972e-05	9.75514e-12	7.05748e-07	3.79126e-08	4.25976e-07	5.6061e-07	3.40953e-07	2.25208e-06	1.0222e-07	9.35023e-08	4.2555e-09	0.000137103	1.57007e-11	1.39109e-08	6.16005e-09	3.21019e-09	3.19638e-09	2.14885e-11	5.38154e-10	4.13564e-12	3.58788e-10
22405	Anterior thigh lean muscle volume (left)	2623	0.276924	1.73364e-05	0.000179976	8.26222e-09	2.76049e-05	2.96917e-06	1.39313e-05	3.21712e-06	2.55138e-05	8.6033e-05	7.12201e-07	1.53528e-07	0.00043052	0.0859777	2.8818e-05	0.000523136	0.0001498	0.000588021	0.000125306	5.54005e-06	0.000108379	4.33611e-06	5.01658e-05
22406	Posterior thigh lean muscle volume (left)	2623	0.465037	4.76885e-07	3.73176e-05	6.22961e-12	3.78661e-07	7.87263e-08	4.06486e-07	2.67681e-07	1.83583e-07	2.93048e-06	3.79456e-08	5.98869e-08	3.1231e-09	8.23402e-05	1.0514e-11	8.19596e-09	2.8956e-09	5.43428e-09	1.0826e-09	4.38235e-12	4.49932e-10	3.87237e-12	2.14976e-10
22407	Visceral adipose tissue volume (VAT)	2655	-0.114423	0.375987	0.0510606	0.0303904	0.441708	0.78344	0.527581	0.755752	0.953752	0.894744	0.53295	0.16152	0.14301	0.776992	0.028947	0.0125049	0.0696978	0.0608488	0.104962	0.0138838	0.194938	0.0425153	0.224033
22408	Abdominal subcutaneous adipose tissue volume (ASAT)	2655	-0.0850366	0.230212	0.0179878	0.0939279	0.219359	0.736948	0.256257	0.402638	0.596621	0.212382	0.326563	0.214064	0.276411	0.742191	0.0180774	0.0699748	0.185718	0.215068	0.195858	0.169931	0.326747	0.114261	0.383709
22409	Total thigh muscle volume	2616	0.405496	9.27149e-07	4.07327e-05	2.00995e-11	9.2935e-07	8.50734e-08	7.28093e-07	3.75146e-07	7.66043e-07	5.69803e-06	4.26217e-08	3.57664e-08	2.47857e-07	0.00169954	1.66795e-09	5.60499e-07	1.43824e-07	2.80845e-07	9.70387e-08	9.11259e-10	3.02099e-08	2.9482e-10	2.17472e-08
22410	Total trunk fat volume	2655	-0.0990399	0.252879	0.0181426	0.0370802	0.272017	0.738163	0.330284	0.524538	0.741788	0.438934	0.377714	0.150388	0.204905	0.740094	0.0150134	0.0332027	0.120664	0.130926	0.142094	0.0724648	0.256536	0.0705643	0.303648
22411	VAT/ASAT error indicator	12	-4.68332	0.163889	0.21529	0.182462	0.240992	0.114804	0.184409	0.147471	0.178476	0.252263	0.211408	0.124007	0.260292	0.168979	0.243967	0.224708	0.355454	0.181165	0.210565	0.456548	0.328827	0.190956	0.335132
22412	Thigh error indicator (left)	44	2.45385	0.210173	0.188429	0.227737	0.264525	0.251944	0.224032	0.189632	0.0308234	0.260783	0.184467	0.240968	0.122759	0.065839	0.125599	0.194198	0.157708	0.135121	0.130221	0.200096	0.193024	0.0906938	0.145669
22413	Thigh error indicator (right)	39	5.38144	0.298696	0.230606	0.278771	0.283847	0.441662	0.299464	0.334749	0.549887	0.357183	0.310901	0.427815	0.0153909	0.0063587	0.0383072	0.0129221	0.026003	0.0144337	0.0225054	0.0249391	0.0189649	0.0053478	0.00878584
22414	Image quality indicator	10	-2.49139	0.263171	0.258951	0.185382	0.31675	0.146571	0.25264	0.21818	0.39829	0.149699	0.279434	0.134639	0.303749	0.0353104	0.276671	0.213612	0.546056	0.119623	0.437101	0.272524	0.473408	0.274158	0.124388
22420	LV ejection fraction	2142	-0.109543	0.0629808	0.054743	0.0710431	0.0861792	0.289816	0.0253252	0.0724494	0.0663691	0.0257871	0.103891	0.274511	0.215197	0.247471	0.240431	0.134339	0.92268	0.176823	0.0911525	0.362484	0.146402	0.153168	0.0457219
22421	LV end diastolic volume	2142	0.163419	0.746928	0.850359	0.545147	0.77155	0.254257	0.700269	0.596445	0.977645	0.527229	0.503179	0.89791	0.0644044	0.255893	0.050112	0.0239739	0.0143708	0.0677538	0.0957697	0.00753016	0.0517579	0.0191844	0.0788649
22422	LV end systolic volume	2142	0.135451	0.611093	0.886134	0.511883	0.621507	0.33473	0.5367	0.509629	0.814869	0.381434	0.505864	0.761872	0.125357	0.247972	0.113324	0.0699729	0.11121	0.132471	0.102779	0.0417406	0.0895583	0.0619138	0.11992
22423	LV stroke volume	2142	0.134305	0.769802	0.316584	0.806192	0.724422	0.242975	0.707811	0.986418	0.585259	0.818388	0.676359	0.700489	0.128587	0.660946	0.0898089	0.0447189	0.00234389	0.127402	0.431077	0.00867543	0.159265	0.0353659	0.238277
22424	Cardiac output	2142	0.0319051	0.471419	0.787267	0.218861	0.798334	0.0133791	0.631825	0.497377	0.648272	0.717214	0.2453	0.537971	0.718157	0.62932	0.594602	0.994345	0.00778931	0.778248	0.87905	0.109621	0.917123	0.415024	0.786741
22425	Cardiac index	2142	-0.125122	0.32009	0.107862	0.382837	0.136198	0.404247	0.211204	0.282448	0.179694	0.239957	0.49327	0.296866	0.156852	0.0356705	0.309311	0.0975548	0.305852	0.139968	0.0438625	0.595049	0.0921004	0.232295	0.117354
22426	Average heart rate	2142	-0.115533	0.108506	0.03765	0.100967	0.359192	0.0363616	0.180467	0.275435	0.160651	0.292778	0.260199	0.134805	0.191144	0.250778	0.199999	0.0208947	0.883082	0.141189	0.305906	0.243493	0.120718	0.147876	0.318951
22427	Body surface area	2142	0.38831	7.34909e-08	5.52256e-09	4.08706e-11	8.00387e-08	2.0376e-08	7.79908e-08	4.66668e-08	9.62152e-08	2.26469e-06	3.89961e-09	9.47887e-08	1.06956e-05	8.72051e-05	9.33779e-05	3.84049e-05	1.07804e-05	1.59679e-05	7.15951e-06	8.949e-08	1.20845e-05	4.3e-07	8.50782e-06
22499	Device used to enter occupational data	55577	0.747823	0.72415	0.746094	0.640394	0.53475	0.689226	0.685544	0.548004	0.819844	0.657203	0.718557	0.300409	0.00948048	0.00946698	0.0208138	0.00473615	0.00287708	0.00736586	0.00890598	0.0443591	0.0262875	0.0202003	0.00696883
22500	When occupational data entered	121280	0	1	1	1	1	1	1	1	1	1	1	1	1	1	1	1	1	1	1	1	1	1	1
22501	Year ended full time education	55572	-0.00598047	0.000728281	0.000284829	0.000451593	0.0412925	0.00196451	0.0010943	0.000500416	7.81792e-06	0.00117141	0.00038636	0.202419	0.69379	0.00110747	0.753764	0.124816	0.350014	0.996802	0.0407107	0.890172	0.169332	0.92219	0.0622156
22502	Cough on most days	121280	0	1	1	1	1	1	1	1	1	1	1	1	1	1	1	1	1	1	1	1	1	1	1
22503	Years of cough on most days	7111	0.0185396	0.589058	0.764978	0.815053	0.983304	0.383895	0.766567	0.459368	0.614452	0.449457	0.450704	0.0307391	0.676211	0.273616	0.606706	0.98198	0.888342	0.958059	0.748183	0.643807	0.700453	0.567501	0.304381
22504	Bring up phlegm/sputum/mucus on most days	121280	0	1	1	1	1	1	1	1	1	1	1	1	1	1	1	1	1	1	1	1	1	1	1
22505	Years of bringing up phlegm/sputum/mucus on most days	3589	-0.0210889	0.623877	0.773162	0.791037	0.926013	0.720666	0.73859	0.714742	0.329541	0.514784	0.80961	0.136415	0.742356	0.651685	0.712725	0.436445	0.676033	0.577086	0.642836	0.916026	0.638594	0.866519	0.48376
22506	Tobacco smoking	55577	0.703673	0.0122192	0.0229567	0.00798947	0.013398	0.00250772	0.0199227	0.00769056	0.00416449	0.0043461	0.00204591	0.0117509	0.000656368	0.0125955	0.00124084	0.00222693	1.13044e-05	0.000170827	0.00105173	0.000333232	0.000616814	0.00102668	7.55145e-05
22507	Age of stopping smoking	17978	-0.241358	2.83685e-22	1.29258e-08	4.94663e-22	1.27361e-24	9.88091e-22	3.51186e-25	1.97129e-22	8.39841e-37	1.14336e-23	1.60116e-25	7.26464e-25	7.99768e-19	8.48347e-08	2.42057e-18	4.5925e-21	1.50119e-26	1.15873e-26	5.54083e-13	2.71234e-24	1.35768e-20	2.37136e-21	4.91479e-17
22508	Amount of tobacco currently smoked	1095	-0.316102	0.474583	0.580657	0.42289	0.126335	0.910499	0.315425	0.574115	0.132096	0.304316	0.606196	0.396534	0.00788131	0.0122432	0.0148861	0.0146544	0.0154021	0.00367594	0.0252019	8.0039e-05	0.0123569	0.00642057	0.00840367
22599	Number of jobs held	54663	0.0599954	0.00127016	0.00285016	8.35089e-06	0.000237577	0.00273843	0.00216536	0.00225801	0.0182741	0.000855844	0.00386413	7.46818e-07	9.06529e-05	3.30663e-05	1.34965e-05	5.02239e-05	0.00115187	0.000323975	0.000139292	0.0044256	0.000101726	0.00020314	1.9707e-06
22601	Job coding	402697	0	1	1	1	1	1	1	1	1	1	1	1	1	1	1	1	1	1	1	1	1	1	1
22602	Year job started	55195	0.0297728	0.403598	0.422537	0.57228	0.742884	0.461979	0.3626	0.273795	0.0849619	0.363843	0.350911	0.0979156	0.0506827	0.963907	0.00592835	0.000413804	0.285133	0.023051	0.449596	0.0394766	0.320663	0.0343082	0.000940446
22603	Year job ended	55195	-0.0235684	0.10579	0.161143	0.103318	0.347289	0.168465	0.0928363	0.103805	0.0163763	0.0806082	0.179845	0.0606369	0.121883	0.232885	0.175065	0.0559931	0.658416	0.179362	0.682606	0.00388092	0.758514	0.10711	0.391138
22604	Work hours - lumped category	47158	-0.0982777	0.13987	0.0411692	0.0709122	0.0703263	0.246353	0.136263	0.170827	0.130294	0.137247	0.213099	0.248051	0.235982	0.182826	0.334973	0.263978	0.412722	0.165156	0.241742	0.156868	0.248495	0.228122	0.0746715
22605	Work hours per week - exact value	19384	0.151478	0.0537826	0.0126283	0.0125619	0.0298991	0.0721288	0.0535403	0.0288687	0.0257161	0.0554319	0.146911	0.340306	4.51975e-09	1.42228e-08	3.83153e-09	3.32594e-09	1.14957e-07	1.40162e-08	4.51521e-10	1.99815e-06	2.14841e-08	8.3331e-09	2.02793e-08
22606	Workplace very noisy	55105	0.45186	0.473222	0.45563	0.392634	0.671734	0.238121	0.482786	0.457552	0.57168	0.524306	0.510798	0.717756	0.121724	0.273784	0.0830744	0.0954275	0.0228639	0.11347	0.117922	0.193489	0.107371	0.164869	0.30958
22607	Workplace very cold	55033	0.167977	0.515654	0.321223	0.355941	0.398454	0.356421	0.548961	0.66775	0.805551	0.610833	0.704448	0.684936	0.295455	0.475531	0.274109	0.30492	0.0954963	0.293933	0.322666	0.0585494	0.127035	0.413111	0.229593
22608	Workplace very hot	55053	0.228769	0.0248541	0.0161224	0.0884641	0.0748243	0.0369859	0.0313007	0.0181425	0.0528653	0.0158767	0.0177942	0.0353428	0.133882	0.622436	0.129766	0.183154	0.0791524	0.118312	0.144281	0.0141299	0.0617327	0.180563	0.134566
22609	Workplace very dusty	55019	-0.335984	0.444214	0.560989	0.532286	0.156384	0.581664	0.323491	0.509918	0.143936	0.735295	0.358522	0.407135	0.0226941	0.0115875	0.0178022	0.0407509	0.0570735	0.01643	0.0176678	0.0455904	0.0427578	0.017452	0.0124979
22610	Workplace full of chemical or other fumes	55020	0.105111	0.103006	0.209944	0.138837	0.108837	0.0451439	0.107627	0.119029	0.130114	0.0911483	0.0418622	0.0283095	0.329255	0.962043	0.218948	0.2519	0.369411	0.208653	0.129209	0.204513	0.327153	0.210008	0.266773
22611	Workplace had a lot of cigarette smoke from other people smoking	55042	-0.0299473	0.0819132	0.0959238	0.20503	0.0844276	0.0414972	0.0676439	0.143871	0.0549398	0.0977684	0.0640102	0.122201	0.83187	0.632204	0.808581	0.770501	0.410838	0.576162	0.943782	0.255462	0.879289	0.645495	0.863136
22612	Worked with materials containing asbestos	54996	-0.336348	0.106165	0.593809	0.154335	0.216243	0.0469859	0.0875333	0.0465878	0.00640564	0.0941478	0.087064	0.658285	0.38605	0.183422	0.335243	0.259972	0.209017	0.232745	0.258865	0.212847	0.22697	0.394224	0.348574
22613	Worked with paints, thinners or glues	55008	-0.136247	0.357479	0.0486181	0.438278	0.599883	0.427848	0.339388	0.335875	0.524813	0.527478	0.617216	0.387071	0.485746	0.117325	0.630703	0.506325	0.698287	0.509276	0.672371	0.46263	0.540875	0.444887	0.415768
22614	Worked with pesticides	54973	0.25888	0.0358403	0.0111913	0.0607998	0.0327777	0.0139294	0.0298379	0.0369291	0.125438	0.0867295	0.0414508	0.12111	0.029316	0.203977	0.0105569	0.00949029	0.0245521	0.0077992	0.016901	0.0134158	0.015159	0.00822858	0.154492
[truncated: 1,635 more rows]
